# Supplementary material for: 17-β-Estradiol—β-Cyclodextrin Complex as Solid: Synthesis, Structural and Physicochemical Characterization
Source: MDPI journal article supplement (doi:10.3390/molecules28093747), 2023-04-26

---

The following ALERTS were generated. Each ALERT has the format

**test-name\_ALERT\_alert-type\_alert-level.**

Click on the hyperlinks for more details of the test.

---

### Alert level B

|                   |                                          |                |         |       |
|-------------------|------------------------------------------|----------------|---------|-------|
| PLAT306_ALERT_2_B | Isolated Oxygen Atom (H-atoms Missing ?) | .....          | O5W     | Check |
| PLAT306_ALERT_2_B | Isolated Oxygen Atom (H-atoms Missing ?) | .....          | O6W     | Check |
| PLAT306_ALERT_2_B | Isolated Oxygen Atom (H-atoms Missing ?) | .....          | O7W     | Check |
| PLAT306_ALERT_2_B | Isolated Oxygen Atom (H-atoms Missing ?) | .....          | O10W    | Check |
| PLAT306_ALERT_2_B | Isolated Oxygen Atom (H-atoms Missing ?) | .....          | O11W    | Check |
| PLAT306_ALERT_2_B | Isolated Oxygen Atom (H-atoms Missing ?) | .....          | O12W    | Check |
| PLAT340_ALERT_3_B | Low Bond Precision on C-C Bonds          | .....          | 0.01238 | Ang.  |
| PLAT430_ALERT_2_B | Short Inter D...A Contact                | O5W ..04WA .   | 2.79    | Ang.  |
|                   |                                          | x,y,z =        | 1_555   | Check |
| PLAT430_ALERT_2_B | Short Inter D...A Contact                | O5W ..011W .   | 2.80    | Ang.  |
|                   |                                          | -1+x,y,z =     | 1_455   | Check |
| PLAT430_ALERT_2_B | Short Inter D...A Contact                | O6W ..02WA .   | 2.66    | Ang.  |
|                   |                                          | x,y,z =        | 1_555   | Check |
| PLAT430_ALERT_2_B | Short Inter D...A Contact                | O6W ..02WB .   | 2.70    | Ang.  |
|                   |                                          | x,y,z =        | 1_555   | Check |
| PLAT430_ALERT_2_B | Short Inter D...A Contact                | O6W ..07W .    | 2.75    | Ang.  |
|                   |                                          | x,y,z =        | 1_555   | Check |
| PLAT430_ALERT_2_B | Short Inter D...A Contact                | O6W ..04WA .   | 2.80    | Ang.  |
|                   |                                          | 1+x,y,z =      | 1_655   | Check |
| PLAT430_ALERT_2_B | Short Inter D...A Contact                | O7W ..010W .   | 2.77    | Ang.  |
|                   |                                          | 1+x,y,z =      | 1_655   | Check |
| PLAT430_ALERT_2_B | Short Inter D...A Contact                | O13W ..057_1 . | 2.73    | Ang.  |
|                   |                                          | x,y,z =        | 1_555   | Check |

---

### Alert level C

|                   |                                                   |                     |        |        |
|-------------------|---------------------------------------------------|---------------------|--------|--------|
| DIFMX02_ALERT_1_C | The maximum difference density is > 0.1*ZMAX*0.75 |                     |        |        |
|                   | The relevant atom site should be identified.      |                     |        |        |
| PLAT042_ALERT_1_C | Calc. and Reported MoietyFormula Strings Differ   |                     | Please | Check  |
| PLAT084_ALERT_3_C | High wR2 Value (i.e. > 0.25)                      | .....               | 0.27   | Report |
| PLAT089_ALERT_3_C | Poor Data / Parameter Ratio (Zmax < 18)           | .....               | 6.54   | Note   |
| PLAT097_ALERT_2_C | Large Reported Max. (Positive) Residual Density   |                     | 0.77   | eA-3   |
| PLAT202_ALERT_3_C | Isotropic non-H Atoms in Anion/Solvent            | .....               | 6      | Check  |
|                   | O5W O7W O11W O12W O8WA O9WA                       |                     |        |        |
| PLAT220_ALERT_2_C | NonSolvent Resd 1 O Ueq(max)/Ueq(min) Range       |                     | 3.8    | Ratio  |
| PLAT222_ALERT_3_C | NonSolvent Resd 1 H Uiso(max)/Uiso(min) Range     |                     | 5.1    | Ratio  |
| PLAT234_ALERT_4_C | Large Hirshfeld Difference O61_1 --C61_1 .        |                     | 0.21   | Ang.   |
| PLAT234_ALERT_4_C | Large Hirshfeld Difference C56_1 --C66_1 .        |                     | 0.16   | Ang.   |
| PLAT242_ALERT_2_C | Low 'MainMol' Ueq as Compared to Neighbors of     |                     | C61_1  | Check  |
| PLAT260_ALERT_2_C | Large Average Ueq of Residue Including            | O3W                 | 0.173  | Check  |
| PLAT430_ALERT_2_C | Short Inter D...A Contact                         | O5W ..09WA .        | 2.89   | Ang.   |
|                   |                                                   | -1/2+x,1/2+y,z =    | 3_455  | Check  |
| PLAT430_ALERT_2_C | Short Inter D...A Contact                         | O6W ..04WB .        | 2.86   | Ang.   |
|                   |                                                   | 1+x,y,z =           | 1_655  | Check  |
| PLAT911_ALERT_3_C | Missing FCF Refl Between Thmin & STh/L=           | 0.595               | 17     | Report |
| PLAT975_ALERT_2_C | Check Calcd Resid. Dens.                          | 0.64Ang From O9WB . | 0.45   | eA-3   |
| PLAT975_ALERT_2_C | Check Calcd Resid. Dens.                          | 1.02Ang From O9WA . | 0.41   | eA-3   |
| PLAT976_ALERT_2_C | Check Calcd Resid. Dens.                          | 0.49Ang From O11W . | -0.42  | eA-3   |

---

## ● Alert level G

|                   |                                                  |       |        |
|-------------------|--------------------------------------------------|-------|--------|
| PLAT002_ALERT_2_G | Number of Distance or Angle Restraints on AtSite | 59    | Note   |
| PLAT003_ALERT_2_G | Number of Uiso or Uij Restrained non-H Atoms ... | 40    | Report |
| PLAT007_ALERT_5_G | Number of Unrefined Donor-H Atoms .....          | 27    | Report |
| PLAT045_ALERT_1_G | Calculated and Reported Z Differ by a Factor ... | 0.250 | Check  |
| PLAT072_ALERT_2_G | SHELXL First Parameter in WGHT Unusually Large   | 0.18  | Report |
| PLAT083_ALERT_2_G | SHELXL Second Parameter in WGHT Unusually Large  | 15.85 | Why ?  |
| PLAT172_ALERT_4_G | The CIF-Embedded .res File Contains DFIX Records | 56    | Report |
| PLAT173_ALERT_4_G | The CIF-Embedded .res File Contains DANG Records | 81    | Report |
| PLAT174_ALERT_4_G | The CIF-Embedded .res File Contains FLAT Records | 18    | Report |
| PLAT175_ALERT_4_G | The CIF-Embedded .res File Contains SAME Records | 2     | Report |
| PLAT178_ALERT_4_G | The CIF-Embedded .res File Contains SIMU Records | 2     | Report |
| PLAT300_ALERT_4_G | Atom Site Occupancy of O64A_1 Constrained at     | 0.5   | Check  |
| PLAT300_ALERT_4_G | Atom Site Occupancy of O64B_1 Constrained at     | 0.5   | Check  |
| PLAT300_ALERT_4_G | Atom Site Occupancy of O67A_1 Constrained at     | 0.6   | Check  |
| PLAT300_ALERT_4_G | Atom Site Occupancy of O67B_1 Constrained at     | 0.4   | Check  |
| PLAT300_ALERT_4_G | Atom Site Occupancy of C64A_1 Constrained at     | 0.5   | Check  |
| PLAT300_ALERT_4_G | Atom Site Occupancy of C64B_1 Constrained at     | 0.5   | Check  |
| PLAT300_ALERT_4_G | Atom Site Occupancy of H64A_1 Constrained at     | 0.5   | Check  |
| PLAT300_ALERT_4_G | Atom Site Occupancy of H64B_1 Constrained at     | 0.5   | Check  |
| PLAT300_ALERT_4_G | Atom Site Occupancy of H64C_1 Constrained at     | 0.5   | Check  |
| PLAT300_ALERT_4_G | Atom Site Occupancy of H64D_1 Constrained at     | 0.5   | Check  |
| PLAT300_ALERT_4_G | Atom Site Occupancy of H64E_1 Constrained at     | 0.5   | Check  |
| PLAT300_ALERT_4_G | Atom Site Occupancy of H64F_1 Constrained at     | 0.5   | Check  |
| PLAT300_ALERT_4_G | Atom Site Occupancy of H67C_1 Constrained at     | 0.6   | Check  |
| PLAT300_ALERT_4_G | Atom Site Occupancy of H67D_1 Constrained at     | 0.4   | Check  |
| PLAT300_ALERT_4_G | Atom Site Occupancy of O2_2 Constrained at       | 0.25  | Check  |
| PLAT300_ALERT_4_G | Atom Site Occupancy of O1_2 Constrained at       | 0.25  | Check  |
| PLAT300_ALERT_4_G | Atom Site Occupancy of C11_2 Constrained at      | 0.25  | Check  |
| PLAT300_ALERT_4_G | Atom Site Occupancy of C1_2 Constrained at       | 0.25  | Check  |
| PLAT300_ALERT_4_G | Atom Site Occupancy of C6_2 Constrained at       | 0.25  | Check  |
| PLAT300_ALERT_4_G | Atom Site Occupancy of C8_2 Constrained at       | 0.25  | Check  |
| PLAT300_ALERT_4_G | Atom Site Occupancy of C4_2 Constrained at       | 0.25  | Check  |
| PLAT300_ALERT_4_G | Atom Site Occupancy of C12_2 Constrained at      | 0.25  | Check  |
| PLAT300_ALERT_4_G | Atom Site Occupancy of C15_2 Constrained at      | 0.25  | Check  |
| PLAT300_ALERT_4_G | Atom Site Occupancy of C17_2 Constrained at      | 0.25  | Check  |
| PLAT300_ALERT_4_G | Atom Site Occupancy of C18_2 Constrained at      | 0.25  | Check  |
| PLAT300_ALERT_4_G | Atom Site Occupancy of C16_2 Constrained at      | 0.25  | Check  |
| PLAT300_ALERT_4_G | Atom Site Occupancy of C14_2 Constrained at      | 0.25  | Check  |
| PLAT300_ALERT_4_G | Atom Site Occupancy of C13_2 Constrained at      | 0.25  | Check  |
| PLAT300_ALERT_4_G | Atom Site Occupancy of C10_2 Constrained at      | 0.25  | Check  |
| PLAT300_ALERT_4_G | Atom Site Occupancy of C3_2 Constrained at       | 0.25  | Check  |
| PLAT300_ALERT_4_G | Atom Site Occupancy of C2_2 Constrained at       | 0.25  | Check  |
| PLAT300_ALERT_4_G | Atom Site Occupancy of C7_2 Constrained at       | 0.25  | Check  |
| PLAT300_ALERT_4_G | Atom Site Occupancy of C9_2 Constrained at       | 0.25  | Check  |
| PLAT300_ALERT_4_G | Atom Site Occupancy of C5_2 Constrained at       | 0.25  | Check  |
| PLAT300_ALERT_4_G | Atom Site Occupancy of H11A_2 Constrained at     | 0.25  | Check  |
| PLAT300_ALERT_4_G | Atom Site Occupancy of H11B_2 Constrained at     | 0.25  | Check  |
| PLAT300_ALERT_4_G | Atom Site Occupancy of H11C_2 Constrained at     | 0.25  | Check  |
| PLAT300_ALERT_4_G | Atom Site Occupancy of H6A_2 Constrained at      | 0.25  | Check  |
| PLAT300_ALERT_4_G | Atom Site Occupancy of H6B_2 Constrained at      | 0.25  | Check  |
| PLAT300_ALERT_4_G | Atom Site Occupancy of H8A_2 Constrained at      | 0.25  | Check  |
| PLAT300_ALERT_4_G | Atom Site Occupancy of H8B_2 Constrained at      | 0.25  | Check  |
| PLAT300_ALERT_4_G | Atom Site Occupancy of H4_2 Constrained at       | 0.25  | Check  |
| PLAT300_ALERT_4_G | Atom Site Occupancy of H15_2 Constrained at      | 0.25  | Check  |
| PLAT300_ALERT_4_G | Atom Site Occupancy of H17_2 Constrained at      | 0.25  | Check  |
| PLAT300_ALERT_4_G | Atom Site Occupancy of H2K_2 Constrained at      | 0.25  | Check  |

[illegible]

|                   |                                            |                   |           |       |
|-------------------|--------------------------------------------|-------------------|-----------|-------|
| PLAT300_ALERT_4_G | Atom Site Occupancy of O1W                 | Constrained at    | 0.5       | Check |
| PLAT300_ALERT_4_G | Atom Site Occupancy of O3W                 | Constrained at    | 0.5       | Check |
| PLAT300_ALERT_4_G | Atom Site Occupancy of O13W                | Constrained at    | 0.5       | Check |
| PLAT300_ALERT_4_G | Atom Site Occupancy of O2WA                | Constrained at    | 0.5       | Check |
| PLAT300_ALERT_4_G | Atom Site Occupancy of O2WB                | Constrained at    | 0.5       | Check |
| PLAT300_ALERT_4_G | Atom Site Occupancy of O4WA                | Constrained at    | 0.5       | Check |
| PLAT300_ALERT_4_G | Atom Site Occupancy of O4WB                | Constrained at    | 0.5       | Check |
| PLAT300_ALERT_4_G | Atom Site Occupancy of O8WA                | Constrained at    | 0.7       | Check |
| PLAT300_ALERT_4_G | Atom Site Occupancy of O9WA                | Constrained at    | 0.6       | Check |
| PLAT300_ALERT_4_G | Atom Site Occupancy of Ow8B                | Constrained at    | 0.3       | Check |
| PLAT300_ALERT_4_G | Atom Site Occupancy of O9WB                | Constrained at    | 0.4       | Check |
| PLAT301_ALERT_3_G | Main Residue Disorder .....                | (Resd 1 )         | 4%        | Note  |
| PLAT302_ALERT_4_G | Anion/Solvent/Minor-Residue Disorder       | (Resd 2 )         | 100%      | Note  |
| PLAT302_ALERT_4_G | Anion/Solvent/Minor-Residue Disorder       | (Resd 3 )         | 100%      | Note  |
| PLAT302_ALERT_4_G | Anion/Solvent/Minor-Residue Disorder       | (Resd 4 )         | 100%      | Note  |
| PLAT302_ALERT_4_G | Anion/Solvent/Minor-Residue Disorder       | (Resd 5 )         | 100%      | Note  |
| PLAT302_ALERT_4_G | Anion/Solvent/Minor-Residue Disorder       | (Resd 12 )        | 100%      | Note  |
| PLAT302_ALERT_4_G | Anion/Solvent/Minor-Residue Disorder       | (Resd 13 )        | 100%      | Note  |
| PLAT302_ALERT_4_G | Anion/Solvent/Minor-Residue Disorder       | (Resd 14 )        | 100%      | Note  |
| PLAT302_ALERT_4_G | Anion/Solvent/Minor-Residue Disorder       | (Resd 15 )        | 100%      | Note  |
| PLAT302_ALERT_4_G | Anion/Solvent/Minor-Residue Disorder       | (Resd 16 )        | 100%      | Note  |
| PLAT302_ALERT_4_G | Anion/Solvent/Minor-Residue Disorder       | (Resd 17 )        | 100%      | Note  |
| PLAT302_ALERT_4_G | Anion/Solvent/Minor-Residue Disorder       | (Resd 18 )        | 100%      | Note  |
| PLAT302_ALERT_4_G | Anion/Solvent/Minor-Residue Disorder       | (Resd 19 )        | 100%      | Note  |
| PLAT302_ALERT_4_G | Anion/Solvent/Minor-Residue Disorder       | (Resd 20 )        | 100%      | Note  |
| PLAT304_ALERT_4_G | Non-Integer Number of Atoms in .....       | (Resd 5 )         | 0.50      | Check |
| PLAT304_ALERT_4_G | Non-Integer Number of Atoms in .....       | (Resd 9 )         | 0.50      | Check |
| PLAT304_ALERT_4_G | Non-Integer Number of Atoms in .....       | (Resd 11 )        | 0.50      | Check |
| PLAT304_ALERT_4_G | Non-Integer Number of Atoms in .....       | (Resd 12 )        | 0.50      | Check |
| PLAT304_ALERT_4_G | Non-Integer Number of Atoms in .....       | (Resd 13 )        | 0.50      | Check |
| PLAT304_ALERT_4_G | Non-Integer Number of Atoms in .....       | (Resd 14 )        | 0.50      | Check |
| PLAT304_ALERT_4_G | Non-Integer Number of Atoms in .....       | (Resd 15 )        | 0.50      | Check |
| PLAT304_ALERT_4_G | Non-Integer Number of Atoms in .....       | (Resd 16 )        | 0.50      | Check |
| PLAT304_ALERT_4_G | Non-Integer Number of Atoms in .....       | (Resd 17 )        | 0.70      | Check |
| PLAT304_ALERT_4_G | Non-Integer Number of Atoms in .....       | (Resd 18 )        | 0.60      | Check |
| PLAT304_ALERT_4_G | Non-Integer Number of Atoms in .....       | (Resd 19 )        | 0.30      | Check |
| PLAT304_ALERT_4_G | Non-Integer Number of Atoms in .....       | (Resd 20 )        | 0.40      | Check |
| PLAT311_ALERT_2_G | Isolated Disordered Oxygen Atom (No H's ?) | .....             | O1W       | Check |
| PLAT311_ALERT_2_G | Isolated Disordered Oxygen Atom (No H's ?) | .....             | O3W       | Check |
| PLAT311_ALERT_2_G | Isolated Disordered Oxygen Atom (No H's ?) | .....             | O13W      | Check |
| PLAT311_ALERT_2_G | Isolated Disordered Oxygen Atom (No H's ?) | .....             | O2WA      | Check |
| PLAT311_ALERT_2_G | Isolated Disordered Oxygen Atom (No H's ?) | .....             | O2WB      | Check |
| PLAT311_ALERT_2_G | Isolated Disordered Oxygen Atom (No H's ?) | .....             | O4WA      | Check |
| PLAT311_ALERT_2_G | Isolated Disordered Oxygen Atom (No H's ?) | .....             | O4WB      | Check |
| PLAT311_ALERT_2_G | Isolated Disordered Oxygen Atom (No H's ?) | .....             | O8WA      | Check |
| PLAT311_ALERT_2_G | Isolated Disordered Oxygen Atom (No H's ?) | .....             | O9WA      | Check |
| PLAT311_ALERT_2_G | Isolated Disordered Oxygen Atom (No H's ?) | .....             | Ow8B      | Check |
| PLAT311_ALERT_2_G | Isolated Disordered Oxygen Atom (No H's ?) | .....             | O9WB      | Check |
| PLAT411_ALERT_2_G | Short Inter H...H Contact                  | H35_1 ..H8B_2 .   | 2.11 Ang. |       |
|                   |                                            | x,y,z =           | 1_555     | Check |
| PLAT414_ALERT_2_G | Short Intra D-H..H-X                       | H67A_1 ..H67D_1 . | 1.00 Ang. |       |
|                   |                                            | x,y,z =           | 1_555     | Check |
| PLAT414_ALERT_2_G | Short Intra D-H..H-X                       | H67B_1 ..H67C_1 . | 2.08 Ang. |       |
|                   |                                            | x,y,z =           | 1_555     | Check |
| PLAT415_ALERT_2_G | Short Inter D-H..H-X                       | H61_1 ..H64A_1 .  | 1.86 Ang. |       |
|                   |                                            | 1-x,y,1-z =       | 2_656     | Check |
| PLAT415_ALERT_2_G | Short Inter D-H..H-X                       | H66A_1 ..H67D_1 . | 1.75 Ang. |       |

|                                                                    |             |             |
|--------------------------------------------------------------------|-------------|-------------|
|                                                                    | 1-x,y,1-z = | 2_656 Check |
| PLAT432_ALERT_2_G Short Inter X...Y Contact O13W ..C66_1 .         |             | 3.02 Ang.   |
|                                                                    | 1-x,y,1-z = | 2_656 Check |
| PLAT650_ALERT_4_G SWAT Instruction Used to Model Solvent Disorder  |             | ! Report    |
| PLAT720_ALERT_4_G Number of Unusual/Non-Standard Labels .....      |             | 250 Note    |
| PLAT789_ALERT_4_G Atoms with Negative _atom_site_disorder_group #  |             | 88 Check    |
| PLAT791_ALERT_4_G Model has Chirality at C11_1 (Sohnke SpGr)       |             | S Verify    |
| PLAT791_ALERT_4_G Model has Chirality at C21_1 (Sohnke SpGr)       |             | R Verify    |
| PLAT791_ALERT_4_G Model has Chirality at C31_1 (Sohnke SpGr)       |             | S Verify    |
| PLAT791_ALERT_4_G Model has Chirality at C41_1 (Sohnke SpGr)       |             | S Verify    |
| PLAT791_ALERT_4_G Model has Chirality at C51_1 (Sohnke SpGr)       |             | R Verify    |
| PLAT791_ALERT_4_G Model has Chirality at C12_1 (Sohnke SpGr)       |             | S Verify    |
| PLAT791_ALERT_4_G Model has Chirality at C22_1 (Sohnke SpGr)       |             | R Verify    |
| PLAT791_ALERT_4_G Model has Chirality at C32_1 (Sohnke SpGr)       |             | S Verify    |
| PLAT791_ALERT_4_G Model has Chirality at C42_1 (Sohnke SpGr)       |             | S Verify    |
| PLAT791_ALERT_4_G Model has Chirality at C52_1 (Sohnke SpGr)       |             | R Verify    |
| PLAT791_ALERT_4_G Model has Chirality at C13_1 (Sohnke SpGr)       |             | S Verify    |
| PLAT791_ALERT_4_G Model has Chirality at C23_1 (Sohnke SpGr)       |             | R Verify    |
| PLAT791_ALERT_4_G Model has Chirality at C33_1 (Sohnke SpGr)       |             | S Verify    |
| PLAT791_ALERT_4_G Model has Chirality at C43_1 (Sohnke SpGr)       |             | S Verify    |
| PLAT791_ALERT_4_G Model has Chirality at C53_1 (Sohnke SpGr)       |             | R Verify    |
| PLAT791_ALERT_4_G Model has Chirality at C24_1 (Sohnke SpGr)       |             | R Verify    |
| PLAT791_ALERT_4_G Model has Chirality at C34_1 (Sohnke SpGr)       |             | S Verify    |
| PLAT791_ALERT_4_G Model has Chirality at C15_1 (Sohnke SpGr)       |             | S Verify    |
| PLAT791_ALERT_4_G Model has Chirality at C25_1 (Sohnke SpGr)       |             | R Verify    |
| PLAT791_ALERT_4_G Model has Chirality at C35_1 (Sohnke SpGr)       |             | S Verify    |
| PLAT791_ALERT_4_G Model has Chirality at C45_1 (Sohnke SpGr)       |             | S Verify    |
| PLAT791_ALERT_4_G Model has Chirality at C55_1 (Sohnke SpGr)       |             | R Verify    |
| PLAT791_ALERT_4_G Model has Chirality at C16_1 (Sohnke SpGr)       |             | S Verify    |
| PLAT791_ALERT_4_G Model has Chirality at C26_1 (Sohnke SpGr)       |             | R Verify    |
| PLAT791_ALERT_4_G Model has Chirality at C36_1 (Sohnke SpGr)       |             | S Verify    |
| PLAT791_ALERT_4_G Model has Chirality at C46_1 (Sohnke SpGr)       |             | S Verify    |
| PLAT791_ALERT_4_G Model has Chirality at C56_1 (Sohnke SpGr)       |             | R Verify    |
| PLAT791_ALERT_4_G Model has Chirality at C27_1 (Sohnke SpGr)       |             | R Verify    |
| PLAT791_ALERT_4_G Model has Chirality at C37_1 (Sohnke SpGr)       |             | S Verify    |
| PLAT791_ALERT_4_G Model has Chirality at C1_2 (Sohnke SpGr)        |             | S Verify    |
| PLAT791_ALERT_4_G Model has Chirality at C4_2 (Sohnke SpGr)        |             | S Verify    |
| PLAT791_ALERT_4_G Model has Chirality at C3_2 (Sohnke SpGr)        |             | R Verify    |
| PLAT791_ALERT_4_G Model has Chirality at C2_2 (Sohnke SpGr)        |             | S Verify    |
| PLAT791_ALERT_4_G Model has Chirality at C5_2 (Sohnke SpGr)        |             | S Verify    |
| PLAT791_ALERT_4_G Model has Chirality at C3_3 (Sohnke SpGr)        |             | R Verify    |
| PLAT791_ALERT_4_G Model has Chirality at C2_3 (Sohnke SpGr)        |             | S Verify    |
| PLAT791_ALERT_4_G Model has Chirality at C5_3 (Sohnke SpGr)        |             | S Verify    |
| PLAT791_ALERT_4_G Model has Chirality at C1_3 (Sohnke SpGr)        |             | S Verify    |
| PLAT791_ALERT_4_G Model has Chirality at C4_3 (Sohnke SpGr)        |             | S Verify    |
| PLAT811_ALERT_5_G No ADDSYM Analysis: Too Many Excluded Atoms .... |             | ! Info      |
| PLAT860_ALERT_3_G Number of Least-Squares Restraints .....         |             | 202 Note    |
| PLAT883_ALERT_1_G No Info/Value for _atom_sites_solution_primary . |             | Please Do ! |
| PLAT909_ALERT_3_G Percentage of I>2sig(I) Data at Theta(Max) Still |             | 59% Note    |
| PLAT933_ALERT_2_G Number of HKL-OMIT Records in Embedded .res File |             | 17 Note     |
| PLAT978_ALERT_2_G Number C-C Bonds with Positive Residual Density. |             | 0 Info      |

---

0 **ALERT level A** = Most likely a serious problem - resolve or explain  
 15 **ALERT level B** = A potentially serious problem, consider carefully  
 18 **ALERT level C** = Check. Ensure it is not caused by an omission or oversight  
 215 **ALERT level G** = General information/check it is not something unexpected

4 ALERT type 1 CIF construction/syntax error, inconsistent or missing data  
46 ALERT type 2 Indicator that the structure model may be wrong or deficient  
9 ALERT type 3 Indicator that the structure quality may be low  
187 ALERT type 4 Improvement, methodology, query or suggestion  
2 ALERT type 5 Informative message, check

---

It is advisable to attempt to resolve as many as possible of the alerts in all categories. Often the minor alerts point to easily fixed oversights, errors and omissions in your CIF or refinement strategy, so attention to these fine details can be worthwhile. In order to resolve some of the more serious problems it may be necessary to carry out additional measurements or structure refinements. However, the purpose of your study may justify the reported deviations and the more serious of these should normally be commented upon in the discussion or experimental section of a paper or in the "special\_details" fields of the CIF. checkCIF was carefully designed to identify outliers and unusual parameters, but every test has its limitations and alerts that are not important in a particular case may appear. Conversely, the absence of alerts does not guarantee there are no aspects of the results needing attention. It is up to the individual to critically assess their own results and, if necessary, seek expert advice.

### **Publication of your CIF in IUCr journals**

A basic structural check has been run on your CIF. These basic checks will be run on all CIFs submitted for publication in IUCr journals (*Acta Crystallographica*, *Journal of Applied Crystallography*, *Journal of Synchrotron Radiation*); however, if you intend to submit to *Acta Crystallographica Section C* or *E* or *IUCrData*, you should make sure that full publication checks are run on the final version of your CIF prior to submission.

### **Publication of your CIF in other journals**

Please refer to the *Notes for Authors* of the relevant journal for any special instructions relating to CIF submission.

---

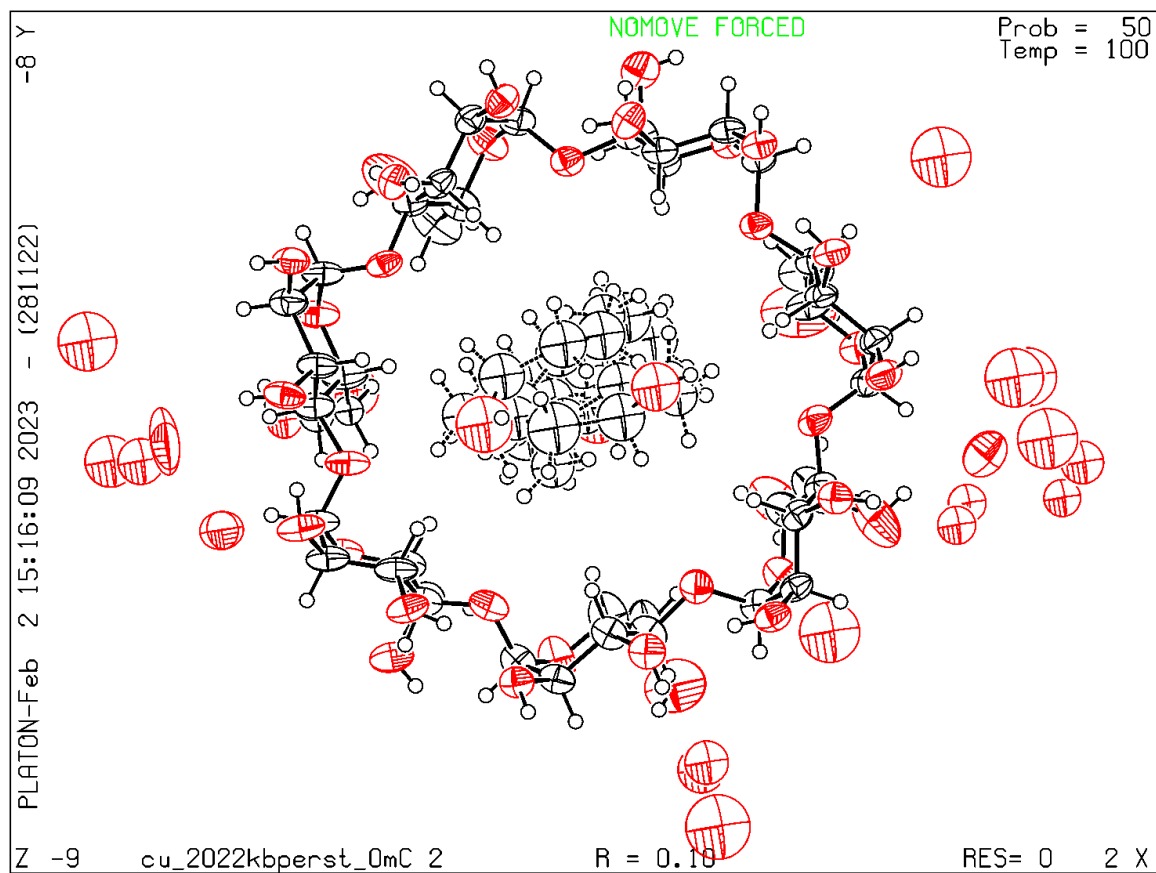

Supplement: s1 [file s1]
