# Supplementary material for: 17-β-Estradiol—β-Cyclodextrin Complex as Solid: Synthesis, Structural and Physicochemical Characterization
Source: MDPI journal article supplement (doi:10.3390/molecules28093747), 2023-04-26
Supplement: s1 [file s1]

**Table S1:** Geometric parameters of the  $\beta$ -CD host molecule in the Est/ $\beta$ -CD crystal structure.

The glucosidic O4 $n$  atoms form a nearly regular heptagon and their mean plane forms an angle of 9.76(7)° with the crystallographic  $ab$  plane. The O64 and O67 atoms of the primary rim hydroxyls are disordered over two sites (A and B). The torsion angle  $t$  (O5 $n$ -C5 $n$ -C6 $n$ -O6 $n$ ) values for these residues indicate that they adopt both gauche-gauche ( $gg$ ) and gauche-trans ( $gt$ ) conformations in the crystal lattice. All remaining glucose units, with the exception of G1 ( $gt$ ) adopt the  $gg$  conformation, their O6 $n$  atoms point outwards the CD cavity, aiding the H-bond formation between the CD macrocycle and the neighboring water molecules.

|                | $D$ (Å)  | $D_K$ (Å) | $d$ (Å)     | $\Phi_n$ (°) | $\Phi_K$ (°) | $\tau$ (°)  | $t$ (°)                     | C    |
|----------------|----------|-----------|-------------|--------------|--------------|-------------|-----------------------------|------|
| Residue number |          |           |             |              |              |             |                             |      |
| $n=1$          | 4.281(3) | 5.155(3)  | 0.055(4)    | 125.610(18)  | 50.375(2)    | 10.5737(12) | 61.659(5)                   | $gt$ |
| $n=2$          | 4.485(3) | 4.889(4)  | 0.004(3)    | 131.860(5)   | 54.123(4)    | 4.1786(4)   | -65.538(2)                  | $gg$ |
| $n=3$          | 4.333(3) | 4.968(3)  | -0.0711(5)  | 129.610(2)   | 50.380(4)    | 11.5198(11) | -60.109(5)                  | $gg$ |
| $n=4$          | 4.295(2) | 5.201(4)  | 0.044(3)    | 124.807(5)   | 49.715(2)    | 12.8987(13) | -64.482(2)<br>(siteA: 0.5)  | $gg$ |
|                |          |           |             |              |              |             | 76.014(4)<br>(siteB: 0.5)   | $gt$ |
| $n=5$          | 4.455(4) | 5.007(3)  | 0.035(3)    | 129.554(3)   | 53.428(5)    | 8.248(8)    | -61.453(5)                  | $gg$ |
| $n=6$          | 4.362(2) | 4.902(3)  | -0.046(4)   | 130.753(4)   | 51.767(4)    | 12.6513(13) | -69.684(5)                  | $gg$ |
| $n=7$          | 4.347(3) | 5.084(4)  | -0.0199(15) | 127.690(4)   | 50.247(5)    | 12.4335(11) | -57.571(4)<br>(siteA: 0.6)  | $gg$ |
|                |          |           |             |              |              |             | 70.7795(13)<br>(siteA: 0.4) | $gt$ |

(a)  $D$ : O4 $n$ ...O4( $n+1$ ) distances; (b)  $D_K$ : K...O4 distances of the approximate center K of the O4 $n$  heptagon from the O4 $n$  atoms; (c)  $d$ : deviations of the O4 $n$  atoms from their least-squares plane; (d)  $\Phi_n$ : O4( $n-1$ )...O4 $n$ ...O4( $n+1$ ) angles; (e)  $\Phi_K$ : O4 $n$ ...K...O4( $n+1$ ) angles; (f)  $\tau$ : tilt angles between the optimum O4 $n$  plane and the mean plane of the O4( $n-1$ )...C1 $n$ ...C4 $n$ ...O4 $n$  atoms; (g)  $t$ : O5 $n$ ...C5 $n$ ...C6 $n$ ...O6 $n$  torsion angles; (h) C: conformation of the primary methoxy groups. All distances are given in Å and angles in (°). The O4 $n$  atoms plane equation is: 0.169\*X -0.008\*Y -0.986\*Z -10.399 = 0

**Table S2.** Main H-bonds in the crystal structure of Est/ $\beta$ -CD inclusion complex as found by Olex2 with a maximum distance of 2.9 Å and a minimum angle of 120°.

| Atom 1  | Atom 2                    | Distance (Å) | Atom 1  | Atom 2                 | Distance (Å) |
|---------|---------------------------|--------------|---------|------------------------|--------------|
| O2 (S1) | O61<br>(1-x,y,1-z)        | 2.92(6)      | O2 (S2) | O61<br>(1-x,y,1-z)     | 2.62(6)      |
| O2 (S1) | O67B<br>(1-x,y,1-z)       | 2.81(6)      | O2 (S2) | O2 (S1)<br>(1-x,y,1-z) | 2.83(7)      |
| O2 (S1) | O2 (S2)<br>(1-x,y,1-z)    | 2.83(7)      | O2 (S2) | O2 (S2)<br>(1-x,y,1-z) | 2.66(11)     |
| O21     | O1W                       | 2.796(2)     | O31     | O22                    | 2.779(3)     |
| O61     | O64B<br>(1-x,y,1-z)       | 2.887(2)     | O32     | O23                    | 2.763(3)     |
| O22     | O27<br>(3/2x,1/2+y,2-z)   | 2.746(2)     | O25     | O34                    | 2.866(2)     |
| O62     | O65<br>(1/2+x,1/2+y,z)    | 2.8198(17)   | O35     | O26                    | 2.816(2)     |
| O23     | O8WA<br>(-1/2+x,1/2+y,z)  | 2.659(1)     |         |                        |              |
| O23     | OW8B<br>(-1/2+x,1/2+y,z)  | 2.839(1)     |         |                        |              |
| O33     | O32<br>(1-x,y,2-z)        | 2.776(2)     |         |                        |              |
| O24     | O9WA<br>(-1/2+x,1/2+y,z)  | 2.828(2)     |         |                        |              |
| O64A    | O12W<br>(-1/2+x,1/2+y,z)  | 2.791(2)     |         |                        |              |
| O64B    | O4WB<br>(-x,y,1-z)        | 2.835(2)     |         |                        |              |
| O65     | O63<br>(1/2-x,-1/2+y,1-z) | 2.765(1)     |         |                        |              |
| O26     | O9WB<br>(1-x,y,2-z)       | 2.7819(16)   |         |                        |              |
| O36     | O9WA                      | 2.816(2)     |         |                        |              |
| O66     | O11W<br>(3/2-x,-1/2+y,z)  | 2.822(2)     |         |                        |              |
| O27     | O36                       | 2.792(2)     |         |                        |              |
| O37     | O8WA                      | 2.844(2)     |         |                        |              |
| O37     | OW8B                      | 2.669(2)     |         |                        |              |
| O67A    | O6W                       | 2.772(2)     |         |                        |              |

**$D = O4n \dots O4(n+1)$  distances (Å)**

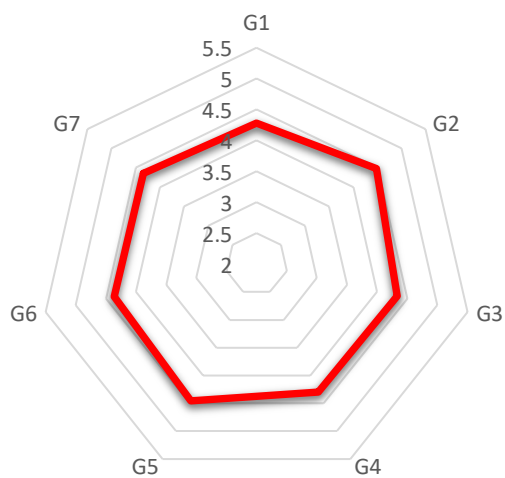

**(a)**

**$D_K$  = distances between the approximate center K of the  $O4n$  heptagon and the  $O4n$  atoms (Å)**

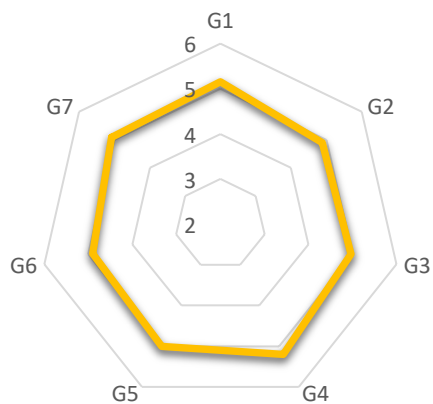

**(b)**

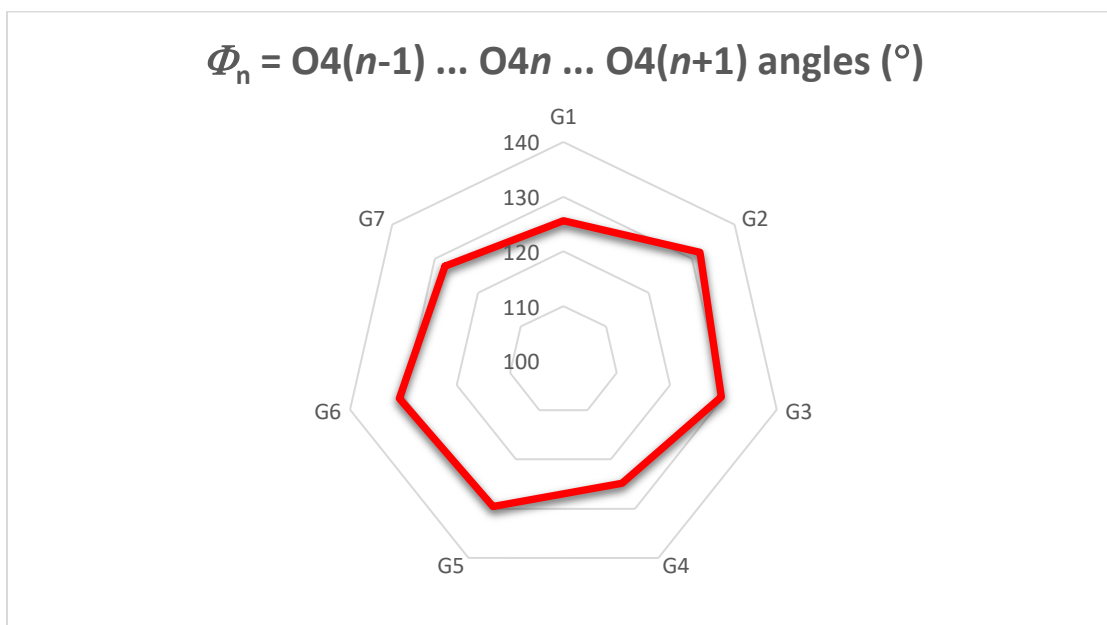

(c)

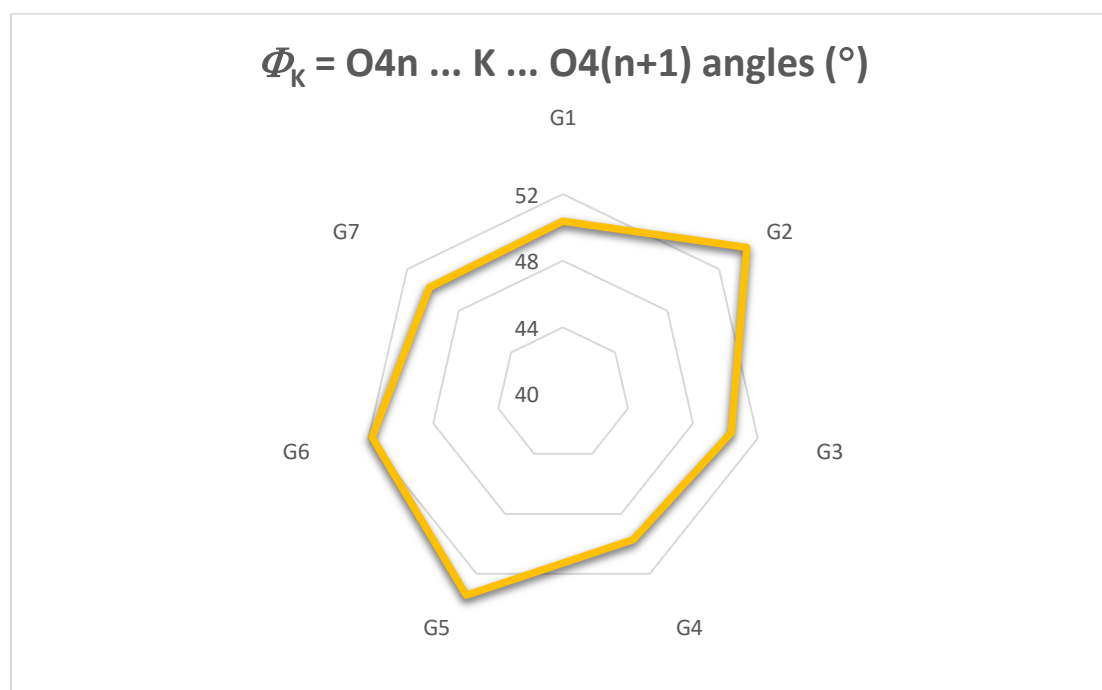

(d)

**Figure S1:** Radar plots of distances and angles as defined in Table S1. (a)  $D$ :  $\text{O4}n \dots \text{O4}(n+1)$  distances; (b)  $D_K$ :  $K \dots \text{O4}$  distances of the approximate center  $K$  of the  $\text{O4}n$  heptagon from the  $\text{O4}n$  atoms; (c)  $\Phi_n$ :  $\text{O4}(n-1) \dots \text{O4}n \dots \text{O4}(n+1)$  angles; (d)  $\Phi_K$ :  $\text{O4}n \dots K \dots \text{O4}(n+1)$  angles.

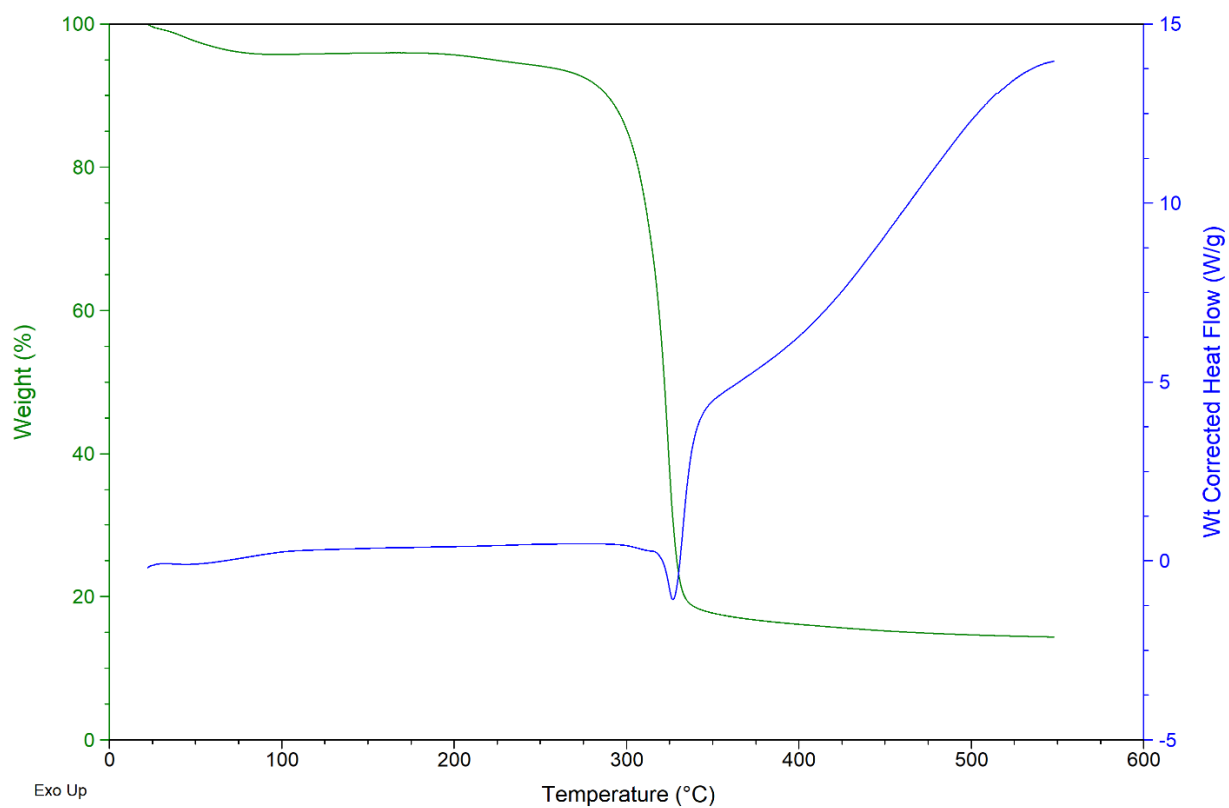

**Figure S2:** DSC/TGA curve of LYS.

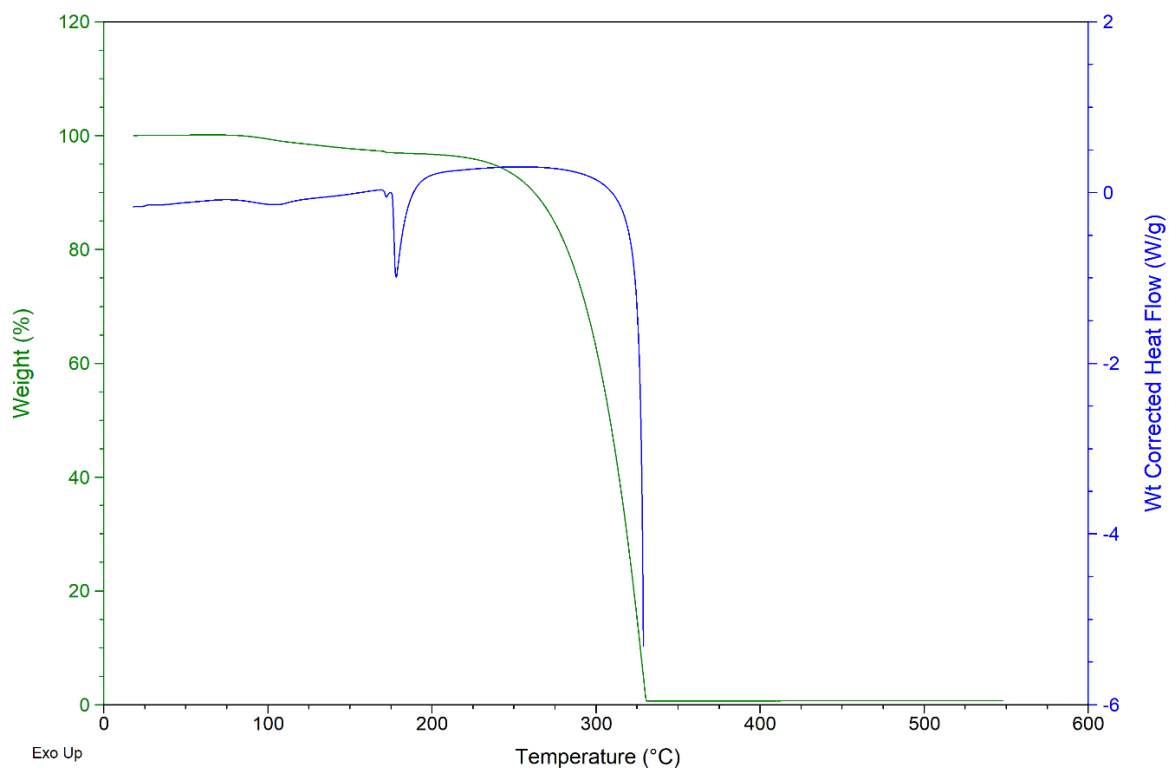

**Figure S3:** DSC/TGA curve of EST.

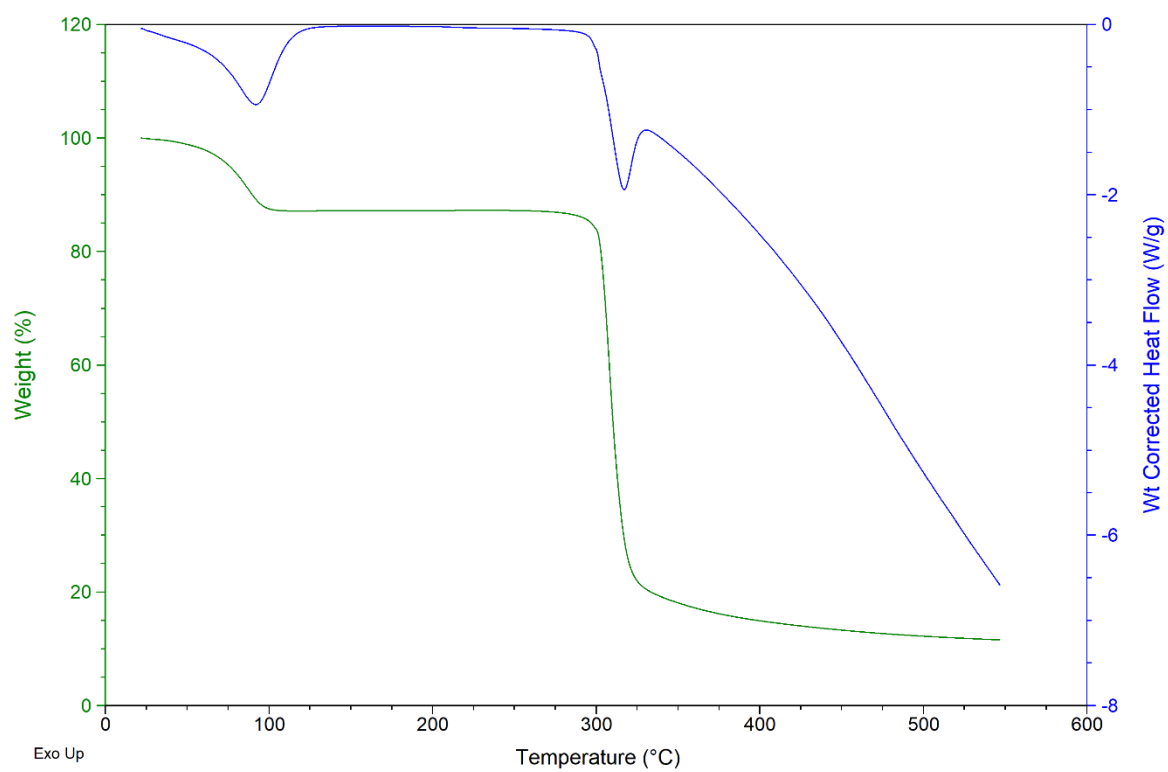

**Figure S4:** DSC/TGA curve of  $\beta$ -CD.

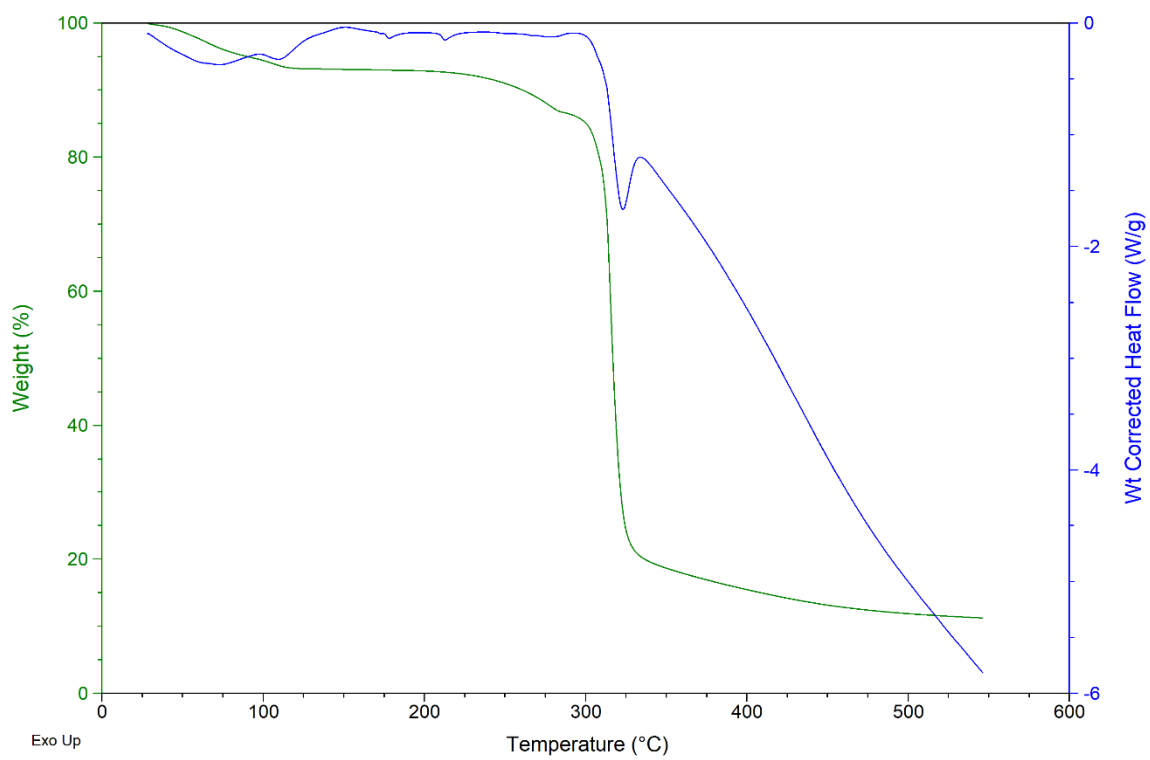

**Figure S5:** DSC/TGA curve of STAND.

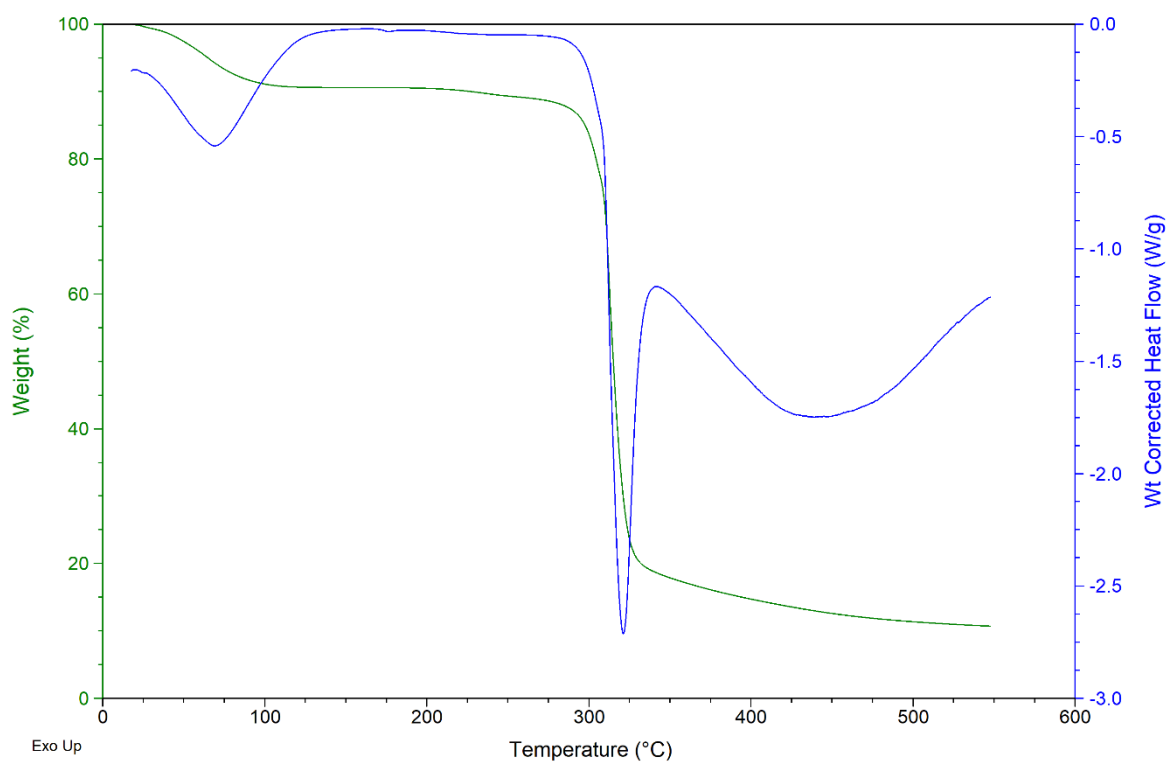

**Figure S6:** DSC/TGA curve of MECH.

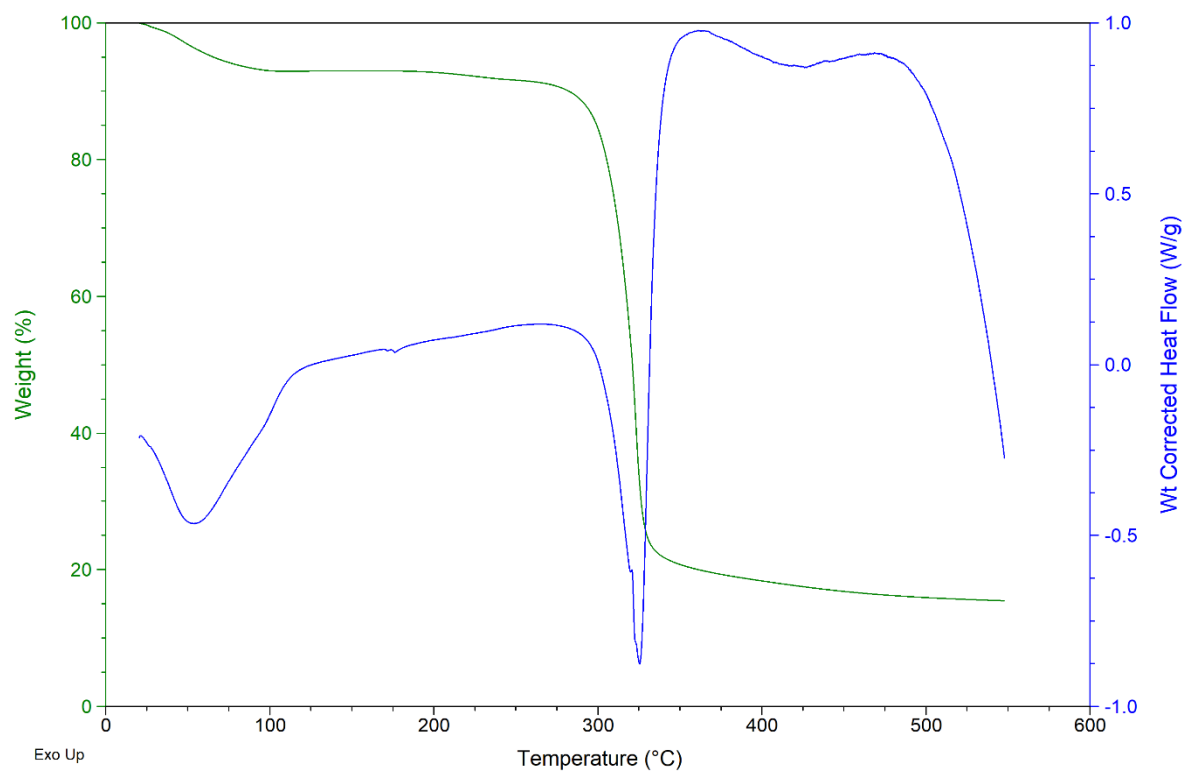

**Figure S7:** DSC/TGA curve of STANDSHORT.
