# Supplementary material for: 17-β-Estradiol—β-Cyclodextrin Complex as Solid: Synthesis, Structural and Physicochemical Characterization
Source: Molecules. 2023 Apr 26;28(9):3747. doi: 10.3390/molecules28093747 (PMC10180119; doi:10.3390/molecules28093747)
Supplement: Supplementary file 1 [file molecules-28-03747-s001.zip]

Archive with 7 entries (7 files):
- ADAD.cif
- ADADopt.cif
- checkcif-1.pdf
- DAAD.cif
- DAADopt.cif
- estradiol_beta-CD.cif
- molecules-2348482-supplementary.pdf
