# Supplementary material for: 17-β-Estradiol—β-Cyclodextrin Complex as Solid: Synthesis, Structural and Physicochemical Characterization
Source: Molecules. 2023 Apr 26;28(9):3747. doi: 10.3390/molecules28093747 (PMC10180119; doi:10.3390/molecules28093747)
Supplement: Supplementary file 1 [file molecules-28-03747-s001.zip › ADAD.cif]

data_ABABfinal
_audit_creation_date              2023-03-31
_audit_creation_method            'owner'
_symmetry_space_group_name_H-M    'P1'
_symmetry_Int_Tables_number       1
_symmetry_cell_setting            triclinic
loop_
_symmetry_equiv_pos_as_xyz
  x,y,z
_cell_length_a                    15.5150
_cell_length_b                    15.5150
_cell_length_c                    15.5942
_cell_angle_alpha                 101.8670
_cell_angle_beta                  101.8670
_cell_angle_gamma                 103.8466
loop_
_atom_site_label
_atom_site_type_symbol
_atom_site_fract_x
_atom_site_fract_y
_atom_site_fract_z
_atom_site_U_iso_or_equiv
_atom_site_adp_type
_atom_site_occupancy
C1     C     1.31030   1.28850   0.82060   0.05800  Uani   1.00
H2     H     1.37614   1.29651   0.82001   0.06900  Uiso   1.00
C3     C     1.30770   1.35310   0.90640   0.05483  Uani   1.00
H4     H     1.33878   1.41752   0.90641   0.06600  Uiso   1.00
O5     O     1.35550   1.33530   0.98510   0.06092  Uani   1.00
H6     H     1.38544   1.38543   1.02398   0.09100  Uiso   1.00
C7     C     1.20810   1.34630   0.90730   0.04537  Uani   1.00
H8     H     1.17701   1.28317   0.91058   0.05400  Uiso   1.00
O9     O     1.20650   1.41210   0.98480   0.04979  Uani   1.00
H10    H     1.15170   1.41030   0.98341   0.07500  Uiso   1.00
C11    C     1.15930   1.36170   0.82070   0.05142  Uani   1.00
H12    H     1.18420   1.42747   0.82085   0.06200  Uiso   1.00
O13    O     1.06340   1.34260   0.81930   0.04542  Uani   1.00
C14    C     1.16740   1.29900   0.73600   0.06417  Uani   1.00
H15    H     1.13576   1.23384   0.73318   0.07700  Uiso   1.00
O16    O     1.26450   1.30830   0.74340   0.06925  Uani   1.00
C17    C     1.12570   1.31890   0.65080   0.09033  Uani   1.00
H18    H     1.06061   1.31532   0.64789   0.10800  Uiso   1.00
H19    H     1.15810   1.38283   0.65272   0.10800  Uiso   1.00
O20    O     1.12890   1.25910   0.57090   0.17446  Uani   1.00
H21    H     1.17045   1.28604   0.55034   0.26200  Uiso   1.00
C22    C     1.02010   1.41390   0.81400   0.04608  Uani   1.00
H23    H     1.06781   1.47326   0.82205   0.05600  Uiso   1.00
C24    C     0.97420   1.42380   0.88800   0.04367  Uani   1.00
H25    H     0.94256   1.47247   0.88346   0.05300  Uiso   1.00
O26    O     1.03970   1.45230   0.97520   0.04725  Uani   1.00
H27    H     1.02625   1.49263   1.01042   0.07100  Uiso   1.00
C28    C     0.90170   1.33450   0.87810   0.04558  Uani   1.00
H29    H     0.93210   1.28501   0.88282   0.05500  Uiso   1.00
O30    O     0.85510   1.34530   0.94750   0.05329  Uani   1.00
H31    H     0.80465   1.30356   0.93166   0.08000  Uiso   1.00
C32    C     0.83420   1.30820   0.78450   0.04604  Uani   1.00
H33    H     0.79757   1.35301   0.78162   0.05600  Uiso   1.00
O34    O     0.77430   1.21790   0.77190   0.04821  Uani   1.00
C35    C     0.88340   1.30420   0.70920   0.04892  Uani   1.00
H36    H     0.91129   1.25227   0.70596   0.05900  Uiso   1.00
O37    O     0.95520   1.39040   0.72870   0.04979  Uani   1.00
C38    C     0.82080   1.29340   0.61690   0.05896  Uani   1.00
H39    H     0.85771   1.29654   0.57227   0.07100  Uiso   1.00
H40    H     0.77433   1.23201   0.59677   0.07100  Uiso   1.00
O41    O     0.77500   1.36240   0.61830   0.06375  Uani   1.00
H42    H     0.80587   1.40679   0.60393   0.09500  Uiso   1.00
C43    C     0.67830   1.20630   0.74160   0.04996  Uani   1.00
H44    H     0.66857   1.26690   0.73768   0.06000  Uiso   1.00
C45    C     0.63180   1.17220   0.81050   0.04708  Uani   1.00
H46    H     0.56542   1.16994   0.79253   0.05600  Uiso   1.00
O47    O     0.67400   1.23500   0.89690   0.05413  Uani   1.00
H48    H     0.63385   1.25325   0.91796   0.08100  Uiso   1.00
C49    C     0.63770   1.07510   0.81140   0.04488  Uani   1.00
H50    H     0.70386   1.07762   0.83170   0.05400  Uiso   1.00
O51    O     0.59030   1.04090   0.87250   0.05042  Uani   1.00
H52    H     0.62509   1.06105   0.92570   0.07600  Uiso   1.00
C53    C     0.59670   1.01270   0.71730   0.04733  Uani   1.00
H54    H     0.52994   1.00818   0.69720   0.05700  Uiso   1.00
O55    O     0.60620   0.92360   0.71870   0.04746  Uani   1.00
C56    C     0.64650   1.04990   0.65170   0.05863  Uani   1.00
H57    H     0.71307   1.05405   0.67314   0.07100  Uiso   1.00
O58    O     0.64020   1.14180   0.65400   0.06096  Uani   1.00
C59    C     0.61210   0.99590   0.55540   0.09046  Uani   1.00
H60    H     0.65082   1.02484   0.51979   0.10800  Uiso   1.00
H61    H     0.61740   0.93291   0.55056   0.10800  Uiso   1.00
O62    O     0.51950   0.99070   0.51820   0.12684  Uani   1.00
H63    H     0.48999   0.93619   0.48849   0.19000  Uiso   1.00
C64    C     0.53000   0.84840   0.68360   0.05392  Uani   1.00
H65    H     0.47469   0.87026   0.66793   0.06500  Uiso   1.00
C66    C     0.51830   0.79450   0.75490   0.05608  Uani   1.00
H67    H     0.46176   0.74049   0.72869   0.06700  Uiso   1.00
O68    O     0.50820   0.85180   0.83300   0.05679  Uani   1.00
H69    H     0.47183   0.82014   0.85569   0.08600  Uiso   1.00
C70    C     0.60270   0.75970   0.77720   0.05050  Uani   1.00
H71    H     0.65942   0.81367   0.80349   0.06100  Uiso   1.00
O72    O     0.59430   0.70650   0.84090   0.05783  Uani   1.00
H73    H     0.54510   0.66290   0.82028   0.08700  Uiso   1.00
C74    C     0.61070   0.70150   0.69150   0.05546  Uani   1.00
H75    H     0.55749   0.64404   0.66834   0.06600  Uiso   1.00
O76    O     0.69500   0.67840   0.71220   0.05642  Uani   1.00
C77    C     0.61320   0.75440   0.61760   0.06546  Uani   1.00
H78    H     0.66795   0.81029   0.64497   0.07900  Uiso   1.00
O79    O     0.53480   0.78880   0.60420   0.06113  Uani   1.00
C80    C     0.62790   0.70770   0.53200   0.04400  Uiso   1.00
H81    H     0.63369   0.74890   0.49139   0.05300  Uiso   1.00
H82    H     0.68397   0.68744   0.54370   0.05300  Uiso   1.00
O83    O     0.54620   0.62960   0.49270   0.06100  Uiso   1.00
H84    H     0.49912   0.64769   0.49012   0.09100  Uiso   1.00
C85    C     0.69310   0.58390   0.68880   0.05492  Uani   1.00
H86    H     0.62816   0.54334   0.67181   0.06600  Uiso   1.00
C87    C     0.74800   0.56860   0.77270   0.05521  Uani   1.00
H88    H     0.74814   0.50276   0.75830   0.06600  Uiso   1.00
O89    O     0.70580   0.58380   0.84590   0.06254  Uani   1.00
H90    H     0.67810   0.62352   0.84062   0.09400  Uiso   1.00
C91    C     0.84530   0.62750   0.79920   0.05025  Uani   1.00
H92    H     0.84677   0.69373   0.81565   0.06000  Uiso   1.00
O93    O     0.90020   0.60880   0.87440   0.05283  Uani   1.00
H94    H     0.95619   0.63129   0.87834   0.07900  Uiso   1.00
C95    C     0.88510   0.60910   0.71830   0.05017  Uani   1.00
H96    H     0.89072   0.54510   0.70676   0.06000  Uiso   1.00
O97    O     0.97500   0.67320   0.74220   0.05192  Uani   1.00
C98    C     0.82540   0.61880   0.63390   0.04988  Uani   1.00
H99    H     0.82719   0.68497   0.64299   0.06000  Uiso   1.00
O100   O     0.73280   0.56520   0.61600   0.05684  Uani   1.00
C101   C     0.85550   0.58770   0.54710   0.06117  Uani   1.00
H102   H     0.81465   0.59716   0.49438   0.07300  Uiso   1.00
H103   H     0.91937   0.62497   0.55438   0.07300  Uiso   1.00
O104   O     0.85090   0.49330   0.53180   0.05900  Uani   1.00
H105   H     0.88965   0.48253   0.50386   0.08800  Uiso   1.00
C106   C     1.04890   0.63970   0.72720   0.05713  Uani   1.00
H107   H     1.02733   0.57083   0.70972   0.06900  Uiso   1.00
C108   C     1.12450   0.67330   0.81570   0.04838  Uani   1.00
H109   H     1.17518   0.64603   0.80647   0.05800  Uiso   1.00
O110   O     1.08890   0.64050   0.88500   0.04779  Uani   1.00
H111   H     1.12943   0.62531   0.91813   0.07100  Uiso   1.00
C112   C     1.16310   0.77550   0.84200   0.04863  Uani   1.00
H113   H     1.11368   0.80445   0.85247   0.05900  Uiso   1.00
O114   O     1.23820   0.80620   0.92340   0.05367  Uani   1.00
H115   H     1.27995   0.78251   0.91415   0.08000  Uiso   1.00
C116   C     1.19780   0.80280   0.76400   0.05596  Uani   1.00
H117   H     1.24949   0.77682   0.75557   0.06700  Uiso   1.00
O118   O     1.23010   0.90270   0.78790   0.05254  Uani   1.00
C119   C     1.12100   0.76840   0.67770   0.07983  Uani   1.00
H120   H     1.07191   0.79912   0.68351   0.09600  Uiso   1.00
O121   O     1.08310   0.66870   0.65870   0.07567  Uani   1.00
C122   C     1.15640   0.78200   0.58960   0.09446  Uani   1.00
H123   H     1.10635   0.74786   0.53362   0.11300  Uiso   1.00
H124   H     1.17321   0.84809   0.59117   0.11300  Uiso   1.00
O125   O     1.23390   0.74930   0.58830   0.15146  Uani   1.00
H126   H     1.23567   0.71313   0.62153   0.22700  Uiso   1.00
C127   C     1.32010   0.94390   0.78310   0.05004  Uani   1.00
H128   H     1.35196   0.89536   0.77263   0.06000  Uiso   1.00
C129   C     1.37060   1.01260   0.87290   0.04621  Uani   1.00
H130   H     1.43511   1.04033   0.87070   0.05500  Uiso   1.00
O131   O     1.37530   0.96870   0.94580   0.05017  Uani   1.00
H132   H     1.33083   0.92038   0.93086   0.07500  Uiso   1.00
C133   C     1.32650   1.09030   0.89030   0.04279  Uani   1.00
H134   H     1.26251   1.06402   0.89462   0.05100  Uiso   1.00
O135   O     1.37640   1.15740   0.97030   0.04917  Uani   1.00
H136   H     1.42477   1.18891   0.96236   0.07400  Uiso   1.00
C137   C     1.32170   1.13170   0.80960   0.04817  Uani   1.00
H138   H     1.38556   1.16460   0.80956   0.05800  Uiso   1.00
O139   O     1.27090   1.19770   0.82360   0.05175  Uani   1.00
C140   C     1.27490   1.05910   0.71890   0.05654  Uani   1.00
H141   H     1.20801   1.03338   0.71419   0.06800  Uiso   1.00
O142   O     1.31730   0.98630   0.71160   0.06175  Uani   1.00
C143   C     1.28550   1.09870   0.63740   0.09109  Uani   1.00
H144   H     1.25222   1.05111   0.57947   0.11000  Uiso   1.00
H145   H     1.26022   1.15168   0.63948   0.11000  Uiso   1.00
O146   O     1.38250   1.12770   0.64420   0.10825  Uani   1.00
H147   H     1.40285   1.18529   0.66432   0.16300  Uiso   1.00
O148   O     0.87600   0.01200   0.53600   0.23000  Uiso   1.00
H149   H     0.91437   0.05192   0.52326   0.34900  Uiso   1.00
C150   C     0.86540  -0.05540   0.66200   0.11500  Uiso   1.00
H151   H     0.80701  -0.09824   0.62917   0.13700  Uiso   1.00
C152   C     0.91380  -0.00180   0.61700   0.12200  Uiso   1.00
C153   C     1.00100   0.05300   0.66300   0.15000  Uiso   1.00
H154   H     1.03829   0.08527   0.63157   0.18000  Uiso   1.00
C155   C     1.03500   0.06300   0.75500   0.12000  Uiso   1.00
H156   H     1.09483   0.10393   0.78657   0.14400  Uiso   1.00
C157   C     0.98440   0.01300   0.80280   0.09100  Uiso   1.00
C158   C     0.89860  -0.04920   0.75500   0.09100  Uiso   1.00
C159   C     0.84570  -0.10830   0.79300   0.09700  Uiso   1.00
H160   H     0.82810  -0.17158   0.75255   0.11600  Uiso   1.00
H161   H     0.78817  -0.09135   0.79301   0.11600  Uiso   1.00
C162   C     0.88800  -0.11200   0.88800   0.15000  Uiso   1.00
H163   H     0.92498  -0.15503   0.88548   0.17700  Uiso   1.00
H164   H     0.83819  -0.13337   0.91637   0.17700  Uiso   1.00
C165   C     0.94730  -0.01670   0.94300   0.09600  Uiso   1.00
H166   H     0.90620   0.02394   0.94725   0.11500  Uiso   1.00
C167   C     0.99400  -0.01400   1.03790   0.09400  Uiso   1.00
H168   H     1.04027  -0.04938   1.03222   0.11300  Uiso   1.00
C169   C     0.94200  -0.05200   1.10000   0.11400  Uiso   1.00
H170   H     0.92224  -0.11998   1.08172   0.13700  Uiso   1.00
H171   H     0.88694  -0.02981   1.09897   0.13700  Uiso   1.00
C172   C     1.01300  -0.01300   1.19400   0.14000  Uiso   1.00
H173   H     0.98421   0.01197   1.24083   0.17400  Uiso   1.00
H174   H     1.03847  -0.06092   1.21193   0.17400  Uiso   1.00
C175   C     1.08700   0.06300   1.18300   0.13000  Uiso   1.00
H176   H     1.13681   0.03462   1.17198   0.15500  Uiso   1.00
O177   O     1.13100   0.13900   1.26100   0.13600  Uiso   1.00
H178   H     1.16333   0.18245   1.24674   0.20400  Uiso   1.00
C179   C     1.04920   0.08280   1.09400   0.11200  Uiso   1.00
C180   C     0.98540   0.14260   1.10600   0.18000  Uiso   1.00
H181   H     0.93990   0.11527   1.13518   0.26700  Uiso   1.00
H182   H     1.02156   0.20455   1.14338   0.26700  Uiso   1.00
H183   H     0.95350   0.14624   1.04591   0.26700  Uiso   1.00
C184   C     1.12000   0.12200   1.04800   0.11000  Uiso   1.00
H185   H     1.16724   0.08800   1.05205   0.13200  Uiso   1.00
H186   H     1.15249   0.18719   1.08206   0.13200  Uiso   1.00
C187   C     1.01670   0.02270   0.89480   0.08300  Uiso   1.00
H188   H     1.05804  -0.01788   0.89679   0.09900  Uiso   1.00
C189   C     1.08080   0.11680   0.94900   0.08900  Uiso   1.00
H190   H     1.04688   0.16300   0.94607   0.10600  Uiso   1.00
H191   H     1.13214   0.13277   0.92092   0.10600  Uiso   1.00
O192   O     0.48370   0.54650   0.88500   0.17184  Uani   1.00
O193   O     0.58200   0.41600   0.87300   0.18100  Uiso   1.00
O194   O     0.39600   0.44400   0.68400   0.13600  Uiso   1.00
O195   O     0.29500   0.55640   0.75640   0.17500  Uiso   1.00
O196   O     0.48490   0.31230   0.70570   0.10013  Uani   1.00
O197   O     0.58910   0.32470   0.58390   0.06700  Uiso   1.00
O198   O     0.54450   0.28010   0.96940   0.07400  Uiso   1.00
O199   O     0.38180   0.73140   0.89490   0.10600  Uiso   1.00
O200   O     0.20460   0.56180   0.58440   0.18200  Uiso   1.00
O201   O     0.38300   0.95700   0.56300   0.21300  Uiso   1.00
C202   C    -0.28850  -0.31030   0.17940   0.05800  Uani   1.00
H203   H    -0.29651  -0.37614   0.17999   0.06900  Uiso   1.00
C204   C    -0.35310  -0.30770   0.09360   0.05483  Uani   1.00
H205   H    -0.41752  -0.33878   0.09359   0.06600  Uiso   1.00
O206   O    -0.33530  -0.35550   0.01490   0.06092  Uani   1.00
H207   H    -0.38543  -0.38544  -0.02398   0.09100  Uiso   1.00
C208   C    -0.34630  -0.20810   0.09270   0.04537  Uani   1.00
H209   H    -0.28317  -0.17701   0.08942   0.05400  Uiso   1.00
O210   O    -0.41210  -0.20650   0.01520   0.04979  Uani   1.00
H211   H    -0.41030  -0.15170   0.01658   0.07500  Uiso   1.00
C212   C    -0.36170  -0.15930   0.17930   0.05142  Uani   1.00
H213   H    -0.42747  -0.18420   0.17915   0.06200  Uiso   1.00
O214   O    -0.34260  -0.06340   0.18070   0.04542  Uani   1.00
C215   C    -0.29900  -0.16740   0.26400   0.06417  Uani   1.00
H216   H    -0.23384  -0.13576   0.26682   0.07700  Uiso   1.00
O217   O    -0.30830  -0.26450   0.25660   0.06925  Uani   1.00
C218   C    -0.31890  -0.12570   0.34920   0.09033  Uani   1.00
H219   H    -0.31532  -0.06061   0.35211   0.10800  Uiso   1.00
H220   H    -0.38283  -0.15810   0.34728   0.10800  Uiso   1.00
O221   O    -0.25910  -0.12890   0.42910   0.17446  Uani   1.00
H222   H    -0.28604  -0.17045   0.44966   0.26200  Uiso   1.00
C223   C    -0.41390  -0.02010   0.18600   0.04608  Uani   1.00
H224   H    -0.47326  -0.06782   0.17795   0.05600  Uiso   1.00
C225   C    -0.42380   0.02580   0.11200   0.04367  Uani   1.00
H226   H    -0.47247   0.05744   0.11654   0.05300  Uiso   1.00
O227   O    -0.45230  -0.03970   0.02480   0.04725  Uani   1.00
H228   H    -0.49263  -0.02626  -0.01042   0.07100  Uiso   1.00
C229   C    -0.33450   0.09830   0.12190   0.04558  Uani   1.00
H230   H    -0.28501   0.06790   0.11718   0.05500  Uiso   1.00
O231   O    -0.34530   0.14490   0.05250   0.05329  Uani   1.00
H232   H    -0.30356   0.19535   0.06834   0.08000  Uiso   1.00
C233   C    -0.30820   0.16580   0.21550   0.04604  Uani   1.00
H234   H    -0.35301   0.20243   0.21838   0.05600  Uiso   1.00
O235   O    -0.21790   0.22570   0.22810   0.04821  Uani   1.00
C236   C    -0.30420   0.11660   0.29080   0.04892  Uani   1.00
H237   H    -0.25227   0.08871   0.29404   0.05900  Uiso   1.00
O238   O    -0.39040   0.04480   0.27130   0.04979  Uani   1.00
C239   C    -0.29340   0.17920   0.38310   0.05896  Uani   1.00
H240   H    -0.29654   0.14229   0.42773   0.07100  Uiso   1.00
H241   H    -0.23201   0.22567   0.40323   0.07100  Uiso   1.00
O242   O    -0.36240   0.22500   0.38170   0.06375  Uani   1.00
H243   H    -0.40679   0.19413   0.39607   0.09500  Uiso   1.00
C244   C    -0.20630   0.32170   0.25840   0.04996  Uani   1.00
H245   H    -0.26690   0.33143   0.26232   0.06000  Uiso   1.00
C246   C    -0.17220   0.36820   0.18950   0.04708  Uani   1.00
H247   H    -0.16994   0.43458   0.20746   0.05600  Uiso   1.00
O248   O    -0.23500   0.32600   0.10310   0.05413  Uani   1.00
H249   H    -0.25325   0.36615   0.08204   0.08100  Uiso   1.00
C250   C    -0.07510   0.36230   0.18860   0.04488  Uani   1.00
H251   H    -0.07762   0.29614   0.16830   0.05400  Uiso   1.00
O252   O    -0.04090   0.40970   0.12750   0.05042  Uani   1.00
H253   H    -0.06105   0.37491   0.07430   0.07600  Uiso   1.00
C254   C    -0.01270   0.40330   0.28270   0.04733  Uani   1.00
H255   H    -0.00818   0.47006   0.30280   0.05700  Uiso   1.00
O256   O     0.07640   0.39380   0.28130   0.04746  Uani   1.00
C257   C    -0.04990   0.35350   0.34830   0.05863  Uani   1.00
H258   H    -0.05405   0.28693   0.32686   0.07100  Uiso   1.00
O259   O    -0.14180   0.35980   0.34600   0.06096  Uani   1.00
C260   C     0.00410   0.38790   0.44460   0.09046  Uani   1.00
H261   H    -0.02484   0.34918   0.48021   0.10800  Uiso   1.00
H262   H     0.06709   0.38260   0.44943   0.10800  Uiso   1.00
O263   O     0.00930   0.48050   0.48180   0.12684  Uani   1.00
H264   H     0.06380   0.51001   0.51150   0.19000  Uiso   1.00
C265   C     0.15160   0.47000   0.31640   0.05392  Uani   1.00
H266   H     0.12974   0.52531   0.33207   0.06500  Uiso   1.00
C267   C     0.20550   0.48170   0.24510   0.05608  Uani   1.00
H268   H     0.25951   0.53824   0.27131   0.06700  Uiso   1.00
O269   O     0.14820   0.49180   0.16700   0.05679  Uani   1.00
H270   H     0.17986   0.52817   0.14431   0.08600  Uiso   1.00
C271   C     0.24030   0.39730   0.22280   0.05050  Uani   1.00
H272   H     0.18633   0.34058   0.19651   0.06100  Uiso   1.00
O273   O     0.29350   0.40570   0.15910   0.05783  Uani   1.00
H274   H     0.33710   0.45490   0.17972   0.08700  Uiso   1.00
C275   C     0.29850   0.38930   0.30850   0.05546  Uani   1.00
H276   H     0.35596   0.44251   0.33166   0.06600  Uiso   1.00
O277   O     0.32160   0.30500   0.28780   0.05642  Uani   1.00
C278   C     0.24560   0.38680   0.38240   0.06546  Uani   1.00
H279   H     0.18971   0.33205   0.35503   0.07900  Uiso   1.00
O280   O     0.21120   0.46520   0.39580   0.06113  Uani   1.00
C281   C     0.29230   0.37210   0.46800   0.04400  Uiso   1.00
H282   H     0.25110   0.36631   0.50861   0.05300  Uiso   1.00
H283   H     0.31256   0.31603   0.45630   0.05300  Uiso   1.00
O284   O     0.37040   0.45380   0.50730   0.06100  Uiso   1.00
H285   H     0.35231   0.50088   0.50988   0.09100  Uiso   1.00
C286   C     0.41610   0.30690   0.31120   0.05492  Uani   1.00
H287   H     0.45666   0.37183   0.32819   0.06600  Uiso   1.00
C288   C     0.43140   0.25200   0.22730   0.05521  Uani   1.00
H289   H     0.49724   0.25186   0.24170   0.06600  Uiso   1.00
O290   O     0.41620   0.29420   0.15410   0.06254  Uani   1.00
H291   H     0.37647   0.32189   0.15938   0.09400  Uiso   1.00
C292   C     0.37250   0.15470   0.20080   0.05025  Uani   1.00
H293   H     0.30627   0.15323   0.18435   0.06000  Uiso   1.00
O294   O     0.39120   0.09980   0.12560   0.05283  Uani   1.00
H295   H     0.36871   0.04381   0.12166   0.07900  Uiso   1.00
C296   C     0.39090   0.11490   0.28170   0.05017  Uani   1.00
H297   H     0.45490   0.10928   0.29324   0.06000  Uiso   1.00
O298   O     0.32680   0.02500   0.25780   0.05192  Uani   1.00
C299   C     0.38120   0.17460   0.36610   0.04988  Uani   1.00
H300   H     0.31503   0.17281   0.35700   0.06000  Uiso   1.00
O301   O     0.43480   0.26720   0.38400   0.05684  Uani   1.00
C302   C     0.41230   0.14450   0.45290   0.06117  Uani   1.00
H303   H     0.40284   0.18535   0.50562   0.07300  Uiso   1.00
H304   H     0.37503   0.08063   0.44562   0.07300  Uiso   1.00
O305   O     0.50670   0.14910   0.46820   0.05900  Uani   1.00
H306   H     0.51747   0.11035   0.49614   0.08800  Uiso   1.00
C307   C     0.36030  -0.04890   0.27280   0.05713  Uani   1.00
H308   H     0.42917  -0.02733   0.29028   0.06900  Uiso   1.00
C309   C     0.32670  -0.12450   0.18430   0.04838  Uani   1.00
H310   H     0.35397  -0.17518   0.19353   0.05800  Uiso   1.00
O311   O     0.35950  -0.08890   0.11500   0.04779  Uani   1.00
H312   H     0.37469  -0.12943   0.08187   0.07100  Uiso   1.00
C313   C     0.22450  -0.16310   0.15800   0.04863  Uani   1.00
H314   H     0.19555  -0.11368   0.14753   0.05900  Uiso   1.00
O315   O     0.19380  -0.23820   0.07660   0.05367  Uani   1.00
H316   H     0.21749  -0.27995   0.08585   0.08000  Uiso   1.00
C317   C     0.19720  -0.19780   0.23600   0.05596  Uani   1.00
H318   H     0.22318  -0.24949   0.24443   0.06700  Uiso   1.00
O319   O     0.09730  -0.23010   0.21210   0.05254  Uani   1.00
C320   C     0.23160  -0.12100   0.32230   0.07983  Uani   1.00
H321   H     0.20088  -0.07192   0.31649   0.09600  Uiso   1.00
O322   O     0.33130  -0.08310   0.34130   0.07567  Uani   1.00
C323   C     0.21800  -0.15640   0.41040   0.09446  Uani   1.00
H324   H     0.25214  -0.10635   0.46638   0.11300  Uiso   1.00
H325   H     0.15191  -0.17321   0.40883   0.11300  Uiso   1.00
O326   O     0.25070  -0.23390   0.41170   0.15146  Uani   1.00
H327   H     0.28687  -0.23567   0.37847   0.22700  Uiso   1.00
C328   C     0.05610  -0.32010   0.21690   0.05004  Uani   1.00
H329   H     0.10464  -0.35196   0.22737   0.06000  Uiso   1.00
C330   C    -0.01260  -0.37060   0.12710   0.04621  Uani   1.00
H331   H    -0.04033  -0.43511   0.12930   0.05500  Uiso   1.00
O332   O     0.03130  -0.37530   0.05420   0.05017  Uani   1.00
H333   H     0.07962  -0.33083   0.06914   0.07500  Uiso   1.00
C334   C    -0.09030  -0.32650   0.10970   0.04279  Uani   1.00
H335   H    -0.06402  -0.26251   0.10539   0.05100  Uiso   1.00
O336   O    -0.15740  -0.37640   0.02970   0.04917  Uani   1.00
H337   H    -0.18891  -0.42477   0.03764   0.07400  Uiso   1.00
C338   C    -0.13170  -0.32170   0.19040   0.04817  Uani   1.00
H339   H    -0.16460  -0.38556   0.19044   0.05800  Uiso   1.00
O340   O    -0.19770  -0.27090   0.17640   0.05175  Uani   1.00
C341   C    -0.05910  -0.27490   0.28110   0.05654  Uani   1.00
H342   H    -0.03338  -0.20801   0.28581   0.06800  Uiso   1.00
O343   O     0.01370  -0.31730   0.28840   0.06175  Uani   1.00
C344   C    -0.09870  -0.28550   0.36260   0.09109  Uani   1.00
H345   H    -0.05111  -0.25221   0.42053   0.11000  Uiso   1.00
H346   H    -0.15168  -0.26022   0.36052   0.11000  Uiso   1.00
O347   O    -0.12770  -0.38250   0.35580   0.10825  Uani   1.00
H348   H    -0.18529  -0.40285   0.33568   0.16300  Uiso   1.00
O349   O     0.45350   0.51630   0.11500   0.17184  Uani   1.00
O350   O     0.58400   0.41800   0.12700   0.18100  Uiso   1.00
O351   O     0.55600   0.60400   0.31600   0.13600  Uiso   1.00
O352   O     0.44360   0.70500   0.24360   0.17500  Uiso   1.00
O353   O     0.68770   0.51510   0.29430   0.10013  Uani   1.00
O354   O     0.67530   0.41090   0.41610   0.06700  Uiso   1.00
O355   O     0.71990   0.45550   0.03060   0.07400  Uiso   1.00
O356   O     0.26860   0.61820   0.10510   0.10600  Uiso   1.00
O357   O     0.43820   0.79540   0.41560   0.18200  Uiso   1.00
O358   O     0.04300   0.61700   0.43700   0.21300  Uiso   1.00
O359   O     0.54510   0.45490   0.50000   0.09338  Uani   1.00
O360   O     0.36840   0.63160   0.50000   0.20900  Uiso   1.00
H361   H     0.35630   0.77264   0.94557   0.00000  Uiso   1.00
H362   H     0.45829   0.75389   0.91515   0.00000  Uiso   1.00
H363   H     0.26950   0.59764   0.80707   0.00000  Uiso   1.00
H364   H     0.37149   0.57889   0.77665   0.00000  Uiso   1.00
H365   H     0.17910   0.60304   0.63507   0.00000  Uiso   1.00
H366   H     0.28109   0.58429   0.60465   0.00000  Uiso   1.00
H367   H     0.37050   0.48524   0.73467   0.00000  Uiso   1.00
H368   H     0.47249   0.46649   0.70425   0.00000  Uiso   1.00
H369   H     0.45940   0.35354   0.75637   0.00000  Uiso   1.00
H370   H     0.56139   0.33479   0.72595   0.00000  Uiso   1.00
H371   H     0.45820   0.58774   0.93567   0.00000  Uiso   1.00
H372   H     0.56019   0.56899   0.90525   0.00000  Uiso   1.00
H373   H     0.51900   0.32134   1.02007   0.00000  Uiso   1.00
H374   H     0.62099   0.30259   0.98965   0.00000  Uiso   1.00
H375   H     0.55650   0.45724   0.92367   0.00000  Uiso   1.00
H376   H     0.65849   0.43849   0.89325   0.00000  Uiso   1.00
H377   H     0.35750   0.99824   0.61367   0.00000  Uiso   1.00
H378   H     0.45949   0.97949   0.58325   0.00000  Uiso   1.00
H379   H     0.56360   0.36594   0.63457   0.00000  Uiso   1.00
H380   H     0.66559   0.34719   0.60415   0.00000  Uiso   1.00
H381   H     0.51960   0.49614   0.55067   0.00000  Uiso   1.00
H382   H     0.62159   0.47739   0.52025   0.00000  Uiso   1.00
H383   H     0.64980   0.45214   0.46677   0.00000  Uiso   1.00
H384   H     0.75179   0.43339   0.43635   0.00000  Uiso   1.00
H385   H     0.66220   0.55634   0.34497   0.00000  Uiso   1.00
H386   H     0.76419   0.53759   0.31455   0.00000  Uiso   1.00
H387   H     0.69440   0.49674   0.08127   0.00000  Uiso   1.00
H388   H     0.79639   0.47799   0.05085   0.00000  Uiso   1.00
H389   H     0.55850   0.45924   0.17767   0.00000  Uiso   1.00
H390   H     0.66049   0.44049   0.14725   0.00000  Uiso   1.00
H391   H     0.53050   0.64524   0.36667   0.00000  Uiso   1.00
H392   H     0.63249   0.62649   0.33625   0.00000  Uiso   1.00
H393   H     0.42800   0.55754   0.16567   0.00000  Uiso   1.00
H394   H     0.52999   0.53879   0.13525   0.00000  Uiso   1.00
H395   H     0.24310   0.65944   0.15577   0.00000  Uiso   1.00
H396   H     0.34509   0.64069   0.12535   0.00000  Uiso   1.00
H397   H     0.41810   0.74624   0.29427   0.00000  Uiso   1.00
H398   H     0.52009   0.72749   0.26385   0.00000  Uiso   1.00
H399   H     0.41270   0.83664   0.46627   0.00000  Uiso   1.00
H400   H     0.51469   0.81789   0.43585   0.00000  Uiso   1.00
H401   H     0.34290   0.67284   0.55067   0.00000  Uiso   1.00
H402   H     0.44489   0.65409   0.52025   0.00000  Uiso   1.00
H403   H     0.01750   0.65824   0.48767   0.00000  Uiso   1.00
H404   H     0.11949   0.63949   0.45725   0.00000  Uiso   1.00
loop_
_atom_site_aniso_label
_atom_site_aniso_U_11
_atom_site_aniso_U_22
_atom_site_aniso_U_33
_atom_site_aniso_U_12
_atom_site_aniso_U_13
_atom_site_aniso_U_23
C1        0.06128   0.06319   0.07600   0.02835   0.04578   0.03627
C3        0.04707   0.06045   0.07000   0.02129   0.02735   0.02735
O5        0.04966   0.07069   0.07500   0.02911   0.01840   0.03147
C7        0.05360   0.05169   0.05400   0.03147   0.03154   0.02798
O9        0.05062   0.06209   0.05100   0.03164   0.01794   0.02388
C11       0.06116   0.06307   0.05400   0.03105   0.03616   0.03141
O13       0.05582   0.04818   0.04600   0.02306   0.02095   0.02570
C14       0.09175   0.08601   0.05500   0.05994   0.04501   0.04026
O16       0.08419   0.09757   0.07100   0.05276   0.05529   0.05410
C17       0.13407   0.12451   0.04800   0.07776   0.04336   0.03386
O20       0.25561   0.21356   0.10300   0.14069   0.06025   0.05075
C22       0.05090   0.04898   0.04900   0.02382   0.01455   0.02406
C24       0.05420   0.05038   0.03700   0.03182   0.01011   0.01724
O26       0.05450   0.05068   0.04400   0.02506   0.01647   0.01409
C28       0.06160   0.05204   0.03600   0.02858   0.01931   0.01931
O30       0.04732   0.07409   0.04100   0.01694   0.01749   0.01630
C32       0.05712   0.04947   0.04300   0.02435   0.01654   0.02367
O34       0.05850   0.05468   0.04100   0.02623   0.01116   0.02423
C35       0.05678   0.05487   0.03900   0.02053   0.01151   0.01745
O37       0.05746   0.05937   0.04000   0.02311   0.01235   0.02304
C38       0.07015   0.06632   0.04100   0.01458   0.01672   0.02028
O41       0.06302   0.08404   0.05000   0.02482   0.00606   0.03577
C43       0.05529   0.05529   0.04100   0.02494   0.00252   0.01678
C45       0.04107   0.05445   0.04800   0.01953   0.00612   0.01801
O47       0.05088   0.06618   0.04800   0.02041   0.01885   0.01172
C49       0.03938   0.06615   0.04000   0.02100   0.01378   0.02804
O51       0.04747   0.06276   0.04100   0.01347   0.01388   0.01507
C53       0.04922   0.05113   0.05100   0.02617   0.00857   0.02521
O55       0.04866   0.06204   0.04800   0.03135   0.01599   0.02906
C56       0.08444   0.06532   0.03800   0.03252   0.02112   0.02231
O58       0.08901   0.04887   0.04700   0.02164   0.00501   0.02877
C59       0.14491   0.07992   0.05000   0.03123   0.01763   0.03546
O62       0.19035   0.08330   0.07200   0.03658  -0.03160   0.01712
C64       0.07482   0.05953   0.04200   0.04670   0.01032   0.01864
C66       0.06742   0.05787   0.06300   0.03441   0.02718   0.03074
O68       0.06982   0.05453   0.07200   0.03747   0.03756   0.03162
C70       0.07147   0.05618   0.04100   0.03841   0.01675   0.02507
O72       0.08803   0.05362   0.05200   0.04047   0.02773   0.02536
C74       0.06803   0.06420   0.04700   0.04000   0.01273   0.02105
O76       0.08229   0.05935   0.04000   0.04823   0.00969   0.01444
C77       0.08684   0.08492   0.04700   0.05129   0.02179   0.03130
O79       0.08632   0.06720   0.04600   0.05135   0.01273   0.02105
C85       0.07963   0.05860   0.04300   0.04864   0.01906   0.01312
C87       0.08036   0.06316   0.04100   0.04988   0.01791   0.01909
O89       0.08772   0.08581   0.04200   0.06205   0.02633   0.02515
C91       0.07326   0.06179   0.03200   0.04635   0.01231   0.01825
O93       0.06406   0.07935   0.03700   0.04347   0.02375   0.02612
C95       0.07512   0.05218   0.03400   0.03470   0.01707   0.01350
O97       0.07957   0.04325   0.03400   0.02400   0.00927   0.01165
C98       0.06760   0.05040   0.03400   0.02511   0.01402   0.00689
O100      0.08038   0.06126   0.03600   0.04047   0.01046   0.01046
C101      0.07969   0.07396   0.03400   0.02670   0.01808   0.01570
O104      0.07640   0.07831   0.03700   0.04558   0.02126   0.01413
C106      0.08085   0.05409   0.04400   0.01664   0.03504   0.01484
C108      0.06569   0.05231   0.03600   0.02511   0.02126   0.01413
O110      0.05903   0.05521   0.03800   0.02182   0.01633   0.02228
C112      0.06765   0.05235   0.02900   0.01764   0.01469   0.01588
O114      0.06493   0.06684   0.03600   0.02211   0.01515   0.02346
C116      0.07598   0.05496   0.03400   0.01605   0.01266   0.01147
O118      0.05481   0.05672   0.04700   0.01411   0.00896   0.02322
C119      0.10084   0.08364   0.04000  -0.00165   0.00484   0.03217
O121      0.09771   0.08241   0.03300   0.00182   0.02500   0.00718
C122      0.08903   0.09286   0.08900  -0.00295   0.01805   0.03825
O125      0.19632   0.18485   0.10900   0.07340   0.07253   0.06421
C127      0.06090   0.05898   0.04600   0.02676   0.02930   0.02218
C129      0.04300   0.06594   0.04500   0.02835   0.02133   0.02371
O131      0.05273   0.06420   0.04600   0.02953   0.01536   0.02486
C133      0.04215   0.05362   0.03900   0.01682   0.01749   0.01630
O135      0.06073   0.05691   0.04000   0.02141   0.02231   0.02112
C137      0.05012   0.05776   0.05100   0.02500   0.02710   0.02116
O139      0.05121   0.07032   0.05900   0.03111   0.03361   0.03717
C140      0.07257   0.05919   0.04700   0.02211   0.01857   0.02808
O142      0.09228   0.05596   0.04200   0.01905   0.02668   0.01836
C143      0.14497   0.06468   0.04800   0.01940   0.00570   0.01521
O146      0.18004   0.07490   0.07900   0.01099   0.07507   0.03111
O192      0.12462   0.09021   0.26000  -0.04789   0.12952  -0.02495
O196      0.08656   0.12862   0.09600   0.03346   0.03781   0.03781
C202      0.06319   0.06128   0.07600   0.02835   0.03627   0.04578
C204      0.06045   0.04707   0.07000   0.02129   0.02735   0.02735
O206      0.07069   0.04966   0.07500   0.02911   0.03147   0.01840
C208      0.05169   0.05360   0.05400   0.03147   0.02798   0.03154
O210      0.06209   0.05062   0.05100   0.03164   0.02388   0.01794
C212      0.06307   0.06116   0.05400   0.03105   0.03141   0.03616
O214      0.04818   0.05582   0.04600   0.02306   0.02570   0.02095
C215      0.08601   0.09175   0.05500   0.05994   0.04026   0.04501
O217      0.09757   0.08419   0.07100   0.05276   0.05410   0.05529
C218      0.12451   0.13407   0.04800   0.07776   0.03386   0.04336
O221      0.21356   0.25561   0.10300   0.14069   0.05075   0.06025
C223      0.04898   0.05090   0.04900   0.02382   0.02406   0.01455
C225      0.05038   0.05420   0.03700   0.03182   0.01724   0.01011
O227      0.05068   0.05450   0.04400   0.02506   0.01409   0.01647
C229      0.05204   0.06160   0.03600   0.02858   0.01931   0.01931
O231      0.07409   0.04732   0.04100   0.01694   0.01630   0.01749
C233      0.04947   0.05712   0.04300   0.02435   0.02367   0.01654
O235      0.05468   0.05850   0.04100   0.02623   0.02423   0.01116
C236      0.05487   0.05678   0.03900   0.02053   0.01745   0.01151
O238      0.05937   0.05746   0.04000   0.02311   0.02304   0.01235
C239      0.06632   0.07015   0.04100   0.01458   0.02028   0.01672
O242      0.08404   0.06302   0.05000   0.02482   0.03577   0.00606
C244      0.05529   0.05529   0.04100   0.02494   0.01678   0.00252
C246      0.05445   0.04107   0.04800   0.01953   0.01801   0.00612
O248      0.06618   0.05088   0.04800   0.02041   0.01172   0.01885
C250      0.06615   0.03938   0.04000   0.02100   0.02804   0.01378
O252      0.06276   0.04747   0.04100   0.01347   0.01507   0.01388
C254      0.05113   0.04922   0.05100   0.02617   0.02521   0.00857
O256      0.06204   0.04866   0.04800   0.03135   0.02906   0.01599
C257      0.06532   0.08444   0.03800   0.03252   0.02231   0.02112
O259      0.04887   0.08901   0.04700   0.02164   0.02877   0.00501
C260      0.07992   0.14491   0.05000   0.03123   0.03546   0.01763
O263      0.08330   0.19035   0.07200   0.03658   0.01712  -0.03160
C265      0.05953   0.07482   0.04200   0.04670   0.01864   0.01032
C267      0.05787   0.06742   0.06300   0.03441   0.03074   0.02718
O269      0.05453   0.06982   0.07200   0.03747   0.03162   0.03756
C271      0.05618   0.07147   0.04100   0.03841   0.02507   0.01675
O273      0.05362   0.08803   0.05200   0.04047   0.02536   0.02773
C275      0.06420   0.06803   0.04700   0.04000   0.02105   0.01273
O277      0.05935   0.08229   0.04000   0.04823   0.01444   0.00969
C278      0.08492   0.08684   0.04700   0.05129   0.03130   0.02179
O280      0.06720   0.08632   0.04600   0.05135   0.02105   0.01273
C286      0.05860   0.07963   0.04300   0.04864   0.01312   0.01906
C288      0.06316   0.08036   0.04100   0.04988   0.01909   0.01791
O290      0.08581   0.08772   0.04200   0.06205   0.02515   0.02633
C292      0.06179   0.07326   0.03200   0.04635   0.01825   0.01231
O294      0.07935   0.06406   0.03700   0.04347   0.02612   0.02375
C296      0.05218   0.07512   0.03400   0.03470   0.01350   0.01707
O298      0.04325   0.07957   0.03400   0.02400   0.01165   0.00927
C299      0.05040   0.06760   0.03400   0.02511   0.00689   0.01402
O301      0.06126   0.08038   0.03600   0.04047   0.01046   0.01046
C302      0.07396   0.07969   0.03400   0.02670   0.01570   0.01808
O305      0.07831   0.07640   0.03700   0.04558   0.01413   0.02126
C307      0.05409   0.08085   0.04400   0.01664   0.01484   0.03504
C309      0.05231   0.06569   0.03600   0.02511   0.01413   0.02126
O311      0.05521   0.05903   0.03800   0.02182   0.02228   0.01633
C313      0.05235   0.06765   0.02900   0.01764   0.01588   0.01469
O315      0.06684   0.06493   0.03600   0.02211   0.02346   0.01515
C317      0.05496   0.07598   0.03400   0.01605   0.01147   0.01266
O319      0.05672   0.05481   0.04700   0.01411   0.02322   0.00896
C320      0.08364   0.10084   0.04000  -0.00165   0.03217   0.00484
O322      0.08241   0.09771   0.03300   0.00182   0.00718   0.02500
C323      0.09286   0.08903   0.08900  -0.00295   0.03825   0.01805
O326      0.18485   0.19632   0.10900   0.07340   0.06421   0.07253
C328      0.05898   0.06090   0.04600   0.02676   0.02218   0.02930
C330      0.06594   0.04300   0.04500   0.02835   0.02371   0.02133
O332      0.06420   0.05273   0.04600   0.02953   0.02486   0.01536
C334      0.05362   0.04215   0.03900   0.01682   0.01630   0.01749
O336      0.05691   0.06073   0.04000   0.02141   0.02112   0.02231
C338      0.05776   0.05012   0.05100   0.02500   0.02116   0.02710
O340      0.07032   0.05121   0.05900   0.03111   0.03717   0.03361
C341      0.05919   0.07257   0.04700   0.02211   0.02808   0.01857
O343      0.05596   0.09228   0.04200   0.01905   0.01836   0.02668
C344      0.06468   0.14497   0.04800   0.01940   0.01521   0.00570
O347      0.07490   0.18004   0.07900   0.01099   0.03111   0.07507
O349      0.09021   0.12462   0.26000  -0.04789  -0.02495   0.12952
O353      0.12862   0.08656   0.09600   0.03346   0.03781   0.03781
O359      0.08647   0.08647   0.10700   0.03776   0.01850   0.01850
loop_
_geom_bond_atom_site_label_1
_geom_bond_atom_site_label_2
_geom_bond_distance
_geom_bond_site_symmetry_2
_ccdc_geom_bond_type
C1     O16     1.398   .     S
C1     O139    1.410   .     S
C1     C3      1.512   .     S
C1     H2      1.001   .     S
C3     O5      1.413   .     S
C3     C7      1.527   .     S
C3     H4      1.000   .     S
O5     H6      0.840   .     S
C7     O9      1.421   .     S
C7     C11     1.501   .     S
C7     H8      1.000   .     S
O9     H10     0.840   .     S
C11    O13     1.441   .     S
C11    C14     1.518   .     S
C11    H12     1.000   .     S
O13    C22     1.433   .     S
C14    O16     1.456   .     S
C14    C17     1.480   .     S
C14    H15     1.000   .     S
C17    O20     1.410   .     S
C17    H18     0.989   .     S
C17    H19     0.990   .     S
O20    H21     0.839   .     S
C22    O37     1.411   .     S
C22    C24     1.476   .     S
C22    H23     1.000   .     S
C24    O26     1.431   .     S
C24    C28     1.518   .     S
C24    H25     1.001   .     S
O26    H27     0.840   .     S
C28    O30     1.424   .     S
C28    C32     1.522   .     S
C28    H29     1.000   .     S
O30    H31     0.840   .     S
C32    O34     1.433   .     S
C32    C35     1.525   .     S
C32    H33     1.000   .     S
O34    C43     1.422   .     S
C35    O37     1.450   .     S
C35    C38     1.514   .     S
C35    H36     0.999   .     S
C38    O41     1.419   .     S
C38    H40     0.990   .     S
C38    H39     0.989   .     S
O41    H42     0.839   .     S
C43    O58     1.428   .     S
C43    C45     1.525   .     S
C43    H44     0.999   .     S
C45    O47     1.409   .     S
C45    C49     1.534   .     S
C45    H46     1.000   .     S
O47    H48     0.840   .     S
C49    O51     1.428   .     S
C49    C53     1.494   .     S
C49    H50     0.999   .     S
O51    H52     0.840   .     S
C53    O55     1.429   .     S
C53    C56     1.527   .     S
C53    H54     0.999   .     S
O55    C64     1.367   .     S
C56    O58     1.446   .     S
C56    C59     1.477   .     S
C56    H57     1.000   .     S
C59    O62     1.411   .     S
C59    H60     0.991   .     S
C59    H61     0.989   .     S
O62    H63     0.840   .     S
C64    O79     1.412   .     S
C64    C66     1.537   .     S
C64    H65     0.999   .     S
C66    O68     1.414   .     S
C66    C70     1.535   .     S
C66    H67     0.999   .     S
O68    H69     0.840   .     S
C70    O72     1.423   .     S
C70    C74     1.497   .     S
C70    H71     1.001   .     S
O72    H73     0.840   .     S
C74    O76     1.429   .     S
C74    C77     1.548   .     S
C74    H75     1.000   .     S
O76    C85     1.428   .     S
C77    O79     1.435   .     S
C77    C80     1.472   .     S
C77    H78     1.001   .     S
C80    O83     1.446   .     S
C80    H82     0.989   .     S
C80    H81     0.990   .     S
O83    H84     0.839   .     S
C85    O100    1.411   .     S
C85    C87     1.503   .     S
C85    H86     1.000   .     S
C87    O89     1.435   .     S
C87    C91     1.487   .     S
C87    H88     1.000   .     S
O89    H90     0.839   .     S
C91    O93     1.426   .     S
C91    C95     1.520   .     S
C91    H92     1.000   .     S
O93    H94     0.839   .     S
C95    O97     1.429   .     S
C95    C98     1.503   .     S
C95    H96     1.000   .     S
O97    C106    1.409   .     S
C98    O100    1.415   .     S
C98    C101    1.543   .     S
C98    H99     1.000   .     S
C101   O104    1.416   .     S
C101   H102    0.989   .     S
C101   H103    0.991   .     S
O104   H105    0.840   .     S
C106   O121    1.393   .     S
C106   C108    1.516   .     S
C106   H107    1.000   .     S
C108   O110    1.438   .     S
C108   C112    1.489   .     S
C108   H109    0.999   .     S
O110   H111    0.840   .     S
C112   O114    1.440   .     S
C112   C116    1.523   .     S
C112   H113    1.001   .     S
O114   H115    0.840   .     S
C116   O118    1.451   .     S
C116   C119    1.502   .     S
C116   H117    1.000   .     S
O118   C127    1.414   .     S
C119   O121    1.460   .     S
C119   C122    1.615   .     S
C119   H120    1.000   .     S
C122   O125    1.415   .     S
C122   H123    0.990   .     S
C122   H124    0.990   .     S
O125   H126    0.840   .     S
C127   O142    1.405   .     S
C127   C129    1.499   .     S
C127   H128    1.000   .     S
C129   O131    1.439   .     S
C129   C133    1.527   .     S
C129   H130    1.001   .     S
O131   H132    0.841   .     S
C133   O135    1.386   .     S
C133   C137    1.523   .     S
C133   H134    1.001   .     S
O135   H136    0.840   .     S
C137   O139    1.443   .     S
C137   C140    1.526   .     S
C137   H138    1.000   .     S
C140   O142    1.434   .     S
C140   C143    1.542   .     S
C140   H141    1.000   .     S
C143   O146    1.438   .     S
C143   H145    0.989   .     S
C143   H144    0.990   .     S
O146   H147    0.840   .     S
O148   C152    1.361   .     S
O148   H149    0.837   .     S
C150   C152    1.380   .     S
C150   C158    1.410   .     D
C150   H151    0.952   .     S
C152   C153    1.366   .     D
C153   C155    1.385   .     S
C153   H154    0.951   .     S
C155   C157    1.400   .     D
C155   H156    0.953   .     S
C157   C187    1.383   .     S
C157   C158    1.393   .     S
C158   C159    1.389   .     S
C159   C162    1.511   .     S
C159   H161    0.989   .     S
C159   H160    0.991   .     S
C162   C165    1.507   .     S
C162   H163    0.979   .     S
C162   H164    0.990   .     S
C165   C167    1.495   .     S
C165   C187    1.518   .     S
C165   H166    1.001   .     S
C167   C169    1.505   .     S
C167   C179    1.513   .     S
C167   H168    1.010   .     S
C169   C172    1.543   .     S
C169   H170    0.987   .     S
C169   H171    0.993   .     S
C172   C175    1.501   .     S
C172   H174    0.984   .     S
C172   H173    0.992   .     S
C175   O177    1.421   .     S
C175   C179    1.514   .     S
C175   H176    1.003   .     S
O177   H178    0.837   .     S
C179   C184    1.508   .     S
C179   C180    1.523   .     S
C180   H183    0.985   .     S
C180   H182    0.977   .     S
C180   H181    0.976   .     S
C184   C189    1.516   .     S
C184   H186    0.992   .     S
C184   H185    1.000   .     S
C187   C189    1.512   .     S
C187   H188    1.001   .     S
C189   H190    0.988   .     S
C189   H191    0.991   .     S
O192   H371    1.110   .     S
O192   H372    1.110   .     S
O193   H375    1.110   .     S
O193   H376    1.110   .     S
O194   H367    1.110   .     S
O194   H368    1.110   .     S
O195   H363    1.110   .     S
O195   H364    1.110   .     S
O196   H369    1.110   .     S
O196   H370    1.110   .     S
O197   H379    1.110   .     S
O197   H380    1.110   .     S
O198   H373    1.110   .     S
O198   H374    1.110   .     S
O199   H361    1.110   .     S
O199   H362    1.110   .     S
O200   H365    1.110   .     S
O200   H366    1.110   .     S
O201   H377    1.110   .     S
O201   H378    1.110   .     S
C202   O217    1.398   .     S
C202   O340    1.410   .     S
C202   C204    1.512   .     S
C202   H203    1.001   .     S
C204   O206    1.413   .     S
C204   C208    1.527   .     S
C204   H205    1.000   .     S
O206   H207    0.840   .     S
C208   O210    1.421   .     S
C208   C212    1.501   .     S
C208   H209    1.000   .     S
O210   H211    0.840   .     S
C212   O214    1.441   .     S
C212   C215    1.518   .     S
C212   H213    1.000   .     S
O214   C223    1.433   .     S
C215   O217    1.456   .     S
C215   C218    1.480   .     S
C215   H216    1.000   .     S
C218   O221    1.410   .     S
C218   H219    0.989   .     S
C218   H220    0.990   .     S
O221   H222    0.839   .     S
C223   O238    1.411   .     S
C223   C225    1.476   .     S
C223   H224    1.000   .     S
C225   O227    1.431   .     S
C225   C229    1.518   .     S
C225   H226    1.001   .     S
O227   H228    0.840   .     S
C229   O231    1.424   .     S
C229   C233    1.522   .     S
C229   H230    1.000   .     S
O231   H232    0.840   .     S
C233   O235    1.433   .     S
C233   C236    1.525   .     S
C233   H234    1.000   .     S
O235   C244    1.422   .     S
C236   O238    1.450   .     S
C236   C239    1.514   .     S
C236   H237    0.999   .     S
C239   O242    1.419   .     S
C239   H241    0.990   .     S
C239   H240    0.989   .     S
O242   H243    0.839   .     S
C244   O259    1.428   .     S
C244   C246    1.525   .     S
C244   H245    0.999   .     S
C246   O248    1.409   .     S
C246   C250    1.534   .     S
C246   H247    1.000   .     S
O248   H249    0.840   .     S
C250   O252    1.428   .     S
C250   C254    1.494   .     S
C250   H251    0.999   .     S
O252   H253    0.840   .     S
C254   O256    1.429   .     S
C254   C257    1.527   .     S
C254   H255    0.999   .     S
O256   C265    1.367   .     S
C257   O259    1.446   .     S
C257   C260    1.477   .     S
C257   H258    1.000   .     S
C260   O263    1.411   .     S
C260   H261    0.991   .     S
C260   H262    0.989   .     S
O263   H264    0.840   .     S
C265   O280    1.412   .     S
C265   C267    1.537   .     S
C265   H266    0.999   .     S
C267   O269    1.414   .     S
C267   C271    1.535   .     S
C267   H268    0.999   .     S
O269   H270    0.840   .     S
C271   O273    1.423   .     S
C271   C275    1.497   .     S
C271   H272    1.001   .     S
O273   H274    0.840   .     S
C275   O277    1.429   .     S
C275   C278    1.548   .     S
C275   H276    1.000   .     S
O277   C286    1.428   .     S
C278   O280    1.435   .     S
C278   C281    1.472   .     S
C278   H279    1.001   .     S
C281   O284    1.446   .     S
C281   H283    0.989   .     S
C281   H282    0.990   .     S
O284   H285    0.839   .     S
C286   O301    1.411   .     S
C286   C288    1.503   .     S
C286   H287    1.000   .     S
C288   O290    1.435   .     S
C288   C292    1.487   .     S
C288   H289    1.000   .     S
O290   H291    0.839   .     S
C292   O294    1.426   .     S
C292   C296    1.520   .     S
C292   H293    1.000   .     S
O294   H295    0.839   .     S
C296   O298    1.429   .     S
C296   C299    1.503   .     S
C296   H297    1.000   .     S
O298   C307    1.409   .     S
C299   O301    1.415   .     S
C299   C302    1.543   .     S
C299   H300    1.000   .     S
C302   O305    1.416   .     S
C302   H303    0.989   .     S
C302   H304    0.991   .     S
O305   H306    0.840   .     S
C307   O322    1.393   .     S
C307   C309    1.516   .     S
C307   H308    1.000   .     S
C309   O311    1.438   .     S
C309   C313    1.489   .     S
C309   H310    0.999   .     S
O311   H312    0.840   .     S
C313   O315    1.440   .     S
C313   C317    1.523   .     S
C313   H314    1.001   .     S
O315   H316    0.840   .     S
C317   O319    1.451   .     S
C317   C320    1.502   .     S
C317   H318    1.000   .     S
O319   C328    1.414   .     S
C320   O322    1.460   .     S
C320   C323    1.615   .     S
C320   H321    1.000   .     S
C323   O326    1.415   .     S
C323   H324    0.990   .     S
C323   H325    0.990   .     S
O326   H327    0.840   .     S
C328   O343    1.405   .     S
C328   C330    1.499   .     S
C328   H329    1.000   .     S
C330   O332    1.439   .     S
C330   C334    1.527   .     S
C330   H331    1.001   .     S
O332   H333    0.841   .     S
C334   O336    1.386   .     S
C334   C338    1.523   .     S
C334   H335    1.001   .     S
O336   H337    0.840   .     S
C338   O340    1.443   .     S
C338   C341    1.526   .     S
C338   H339    1.000   .     S
C341   O343    1.434   .     S
C341   C344    1.542   .     S
C341   H342    1.000   .     S
C344   O347    1.438   .     S
C344   H346    0.989   .     S
C344   H345    0.990   .     S
O347   H348    0.840   .     S
O349   H393    1.110   .     S
O349   H394    1.110   .     S
O350   H389    1.110   .     S
O350   H390    1.110   .     S
O351   H391    1.110   .     S
O351   H392    1.110   .     S
O352   H397    1.110   .     S
O352   H398    1.110   .     S
O353   H385    1.110   .     S
O353   H386    1.110   .     S
O354   H383    1.110   .     S
O354   H384    1.110   .     S
O355   H387    1.110   .     S
O355   H388    1.110   .     S
O356   H395    1.110   .     S
O356   H396    1.110   .     S
O357   H399    1.110   .     S
O357   H400    1.110   .     S
O358   H403    1.110   .     S
O358   H404    1.110   .     S
O359   H381    1.110   .     S
O359   H382    1.110   .     S
O360   H401    1.110   .     S
O360   H402    1.110   .     S
