# Supplementary material for: 17-β-Estradiol—β-Cyclodextrin Complex as Solid: Synthesis, Structural and Physicochemical Characterization
Source: Molecules. 2023 Apr 26;28(9):3747. doi: 10.3390/molecules28093747 (PMC10180119; doi:10.3390/molecules28093747)
Supplement: Supplementary file 1 [file molecules-28-03747-s001.zip › ADADopt.cif]

data_zoptymalizowanyABAB
_audit_creation_date              2023-03-31
_audit_creation_method            'owner'
_symmetry_space_group_name_H-M    'P1'
_symmetry_Int_Tables_number       1
_symmetry_cell_setting            triclinic
loop_
_symmetry_equiv_pos_as_xyz
  x,y,z
_cell_length_a                    15.7427
_cell_length_b                    15.3144
_cell_length_c                    31.7184
_cell_angle_alpha                 100.9316
_cell_angle_beta                  99.8354
_cell_angle_gamma                 104.4298
loop_
_atom_site_label
_atom_site_type_symbol
_atom_site_fract_x
_atom_site_fract_y
_atom_site_fract_z
_atom_site_U_iso_or_equiv
_atom_site_adp_type
_atom_site_occupancy
C1     C     1.32268   1.28613   0.40931   0.06026  Uani   1.00
H2     H     1.39315   1.29875   0.40665   0.06900  Uiso   1.00
C3     C     1.31713   1.35558   0.44972   0.05643  Uani   1.00
H4     H     1.34659   1.42499   0.44462   0.06600  Uiso   1.00
O5     O     1.36753   1.34407   0.48835   0.06229  Uani   1.00
H6     H     1.40171   1.40760   0.50592   0.09100  Uiso   1.00
C7     C     1.21931   1.34672   0.45144   0.04694  Uani   1.00
H8     H     1.18631   1.27630   0.45428   0.05400  Uiso   1.00
O9     O     1.21779   1.41392   0.48934   0.05084  Uani   1.00
H10    H     1.15601   1.41969   0.48726   0.07500  Uiso   1.00
C11    C     1.17053   1.36162   0.40869   0.05310  Uani   1.00
H12    H     1.19775   1.43471   0.40748   0.06200  Uiso   1.00
O13    O     1.07701   1.34152   0.40931   0.04675  Uani   1.00
C14    C     1.18215   1.29599   0.36831   0.06606  Uani   1.00
H15    H     1.14701   1.22422   0.36833   0.07700  Uiso   1.00
O16    O     1.27641   1.30409   0.37022   0.07159  Uani   1.00
C17    C     1.14514   1.31510   0.32457   0.09199  Uani   1.00
H18    H     1.07527   1.31639   0.32282   0.10800  Uiso   1.00
H19    H     1.18488   1.38388   0.32246   0.10800  Uiso   1.00
O20    O     1.14282   1.24418   0.28736   0.17740  Uani   1.00
H21    H     1.20488   1.24809   0.28596   0.26200  Uiso   1.00
C22    C     1.03519   1.41235   0.40609   0.04722  Uani   1.00
H23    H     1.08641   1.47794   0.40859   0.05600  Uiso   1.00
C24    C     0.98587   1.42341   0.44335   0.04444  Uani   1.00
H25    H     0.95183   1.47703   0.43981   0.05300  Uiso   1.00
O26    O     1.04972   1.45190   0.48489   0.04827  Uani   1.00
H27    H     1.03844   1.50601   0.50270   0.07100  Uiso   1.00
C28    C     0.91471   1.33191   0.43824   0.04666  Uani   1.00
H29    H     0.94684   1.27597   0.44036   0.05500  Uiso   1.00
O30    O     0.86789   1.34203   0.47293   0.05407  Uani   1.00
H31    H     0.80771   1.29385   0.46409   0.08000  Uiso   1.00
C32    C     0.85091   1.30769   0.39274   0.04720  Uani   1.00
H33    H     0.81358   1.35979   0.39206   0.05600  Uiso   1.00
O34    O     0.79010   1.21755   0.38691   0.04918  Uani   1.00
C35    C     0.90244   1.30729   0.35551   0.04982  Uani   1.00
H36    H     0.93068   1.24766   0.35341   0.05900  Uiso   1.00
O37    O     0.97480   1.39243   0.36450   0.05073  Uani   1.00
C38    C     0.84349   1.29604   0.31019   0.06012  Uani   1.00
H39    H     0.88679   1.29956   0.28629   0.07100  Uiso   1.00
H40    H     0.79463   1.22634   0.30061   0.07100  Uiso   1.00
O41    O     0.79400   1.36220   0.30892   0.06463  Uani   1.00
H42    H     0.82392   1.41341   0.29680   0.09500  Uiso   1.00
C43    C     0.69627   1.20701   0.37334   0.05062  Uani   1.00
H44    H     0.68577   1.27251   0.36750   0.06000  Uiso   1.00
C45    C     0.64904   1.17797   0.40897   0.04782  Uani   1.00
H46    H     0.57882   1.17981   0.39969   0.05600  Uiso   1.00
O47    O     0.69293   1.24130   0.45053   0.05506  Uani   1.00
H48    H     0.64879   1.26933   0.46293   0.08100  Uiso   1.00
C49    C     0.64865   1.07905   0.41179   0.04565  Uani   1.00
H50    H     0.71948   1.07798   0.42122   0.05400  Uiso   1.00
O51    O     0.60001   1.04947   0.44242   0.05124  Uani   1.00
H52    H     0.62740   1.09184   0.47202   0.07600  Uiso   1.00
C53    C     0.60627   1.01235   0.36628   0.04832  Uani   1.00
H54    H     0.53466   1.00954   0.35647   0.05700  Uiso   1.00
O55    O     0.61174   0.92110   0.37037   0.04846  Uani   1.00
C56    C     0.65869   1.04729   0.33266   0.05990  Uani   1.00
H57    H     0.72865   1.04457   0.34314   0.07100  Uiso   1.00
O58    O     0.65856   1.14120   0.33262   0.06236  Uani   1.00
C59    C     0.62534   0.99387   0.28422   0.09251  Uani   1.00
H60    H     0.67739   1.02057   0.26698   0.10800  Uiso   1.00
H61    H     0.61973   0.91990   0.28152   0.10800  Uiso   1.00
O62    O     0.54388   1.00502   0.26162   0.12831  Uani   1.00
H63    H     0.49116   0.97086   0.27122   0.19000  Uiso   1.00
C64    C     0.53570   0.84542   0.35233   0.05480  Uani   1.00
H65    H     0.47555   0.86827   0.34321   0.06500  Uiso   1.00
C66    C     0.51890   0.77922   0.38330   0.05778  Uani   1.00
H67    H     0.45950   0.72012   0.36437   0.06700  Uiso   1.00
O68    O     0.49733   0.82380   0.42144   0.05888  Uani   1.00
H69    H     0.53082   0.81228   0.44785   0.08600  Uiso   1.00
C70    C     0.60040   0.74289   0.39214   0.05164  Uani   1.00
H71    H     0.66064   0.80238   0.40789   0.06100  Uiso   1.00
O72    O     0.59532   0.68579   0.42309   0.05956  Uani   1.00
H73    H     0.53536   0.64170   0.42037   0.08700  Uiso   1.00
C74    C     0.61634   0.69245   0.34876   0.05642  Uani   1.00
H75    H     0.56188   0.62675   0.33400   0.06600  Uiso   1.00
O76    O     0.70077   0.67400   0.35990   0.05728  Uani   1.00
C77    C     0.62178   0.75617   0.31651   0.06666  Uani   1.00
H78    H     0.68195   0.81652   0.33123   0.07900  Uiso   1.00
O79    O     0.54344   0.79059   0.31130   0.06216  Uani   1.00
C80    C     0.63133   0.71585   0.27059   0.04400  Uiso   1.00
H81    H     0.64358   0.77297   0.25382   0.05300  Uiso   1.00
H82    H     0.69036   0.68957   0.27355   0.05300  Uiso   1.00
O83    O     0.55712   0.63884   0.24405   0.06100  Uiso   1.00
H84    H     0.50083   0.65398   0.24497   0.09100  Uiso   1.00
C85    C     0.70590   0.58199   0.34347   0.05599  Uani   1.00
H86    H     0.63823   0.53459   0.32763   0.06600  Uiso   1.00
C87    C     0.75020   0.55169   0.38281   0.05625  Uani   1.00
H88    H     0.74884   0.47880   0.37124   0.06600  Uiso   1.00
O89    O     0.69914   0.55361   0.41585   0.06362  Uani   1.00
H90    H     0.67816   0.60939   0.41822   0.09400  Uiso   1.00
C91    C     0.84779   0.61192   0.40060   0.05101  Uani   1.00
H92    H     0.84847   0.68449   0.41345   0.06000  Uiso   1.00
O93    O     0.88825   0.57755   0.43467   0.05374  Uani   1.00
H94    H     0.94821   0.62091   0.44893   0.07900  Uiso   1.00
C95    C     0.89749   0.60867   0.36310   0.05120  Uani   1.00
H96    H     0.90562   0.53849   0.35443   0.06000  Uiso   1.00
O97    O     0.98552   0.67597   0.37920   0.05298  Uani   1.00
C98    C     0.84799   0.62987   0.32195   0.05078  Uani   1.00
H99    H     0.85672   0.70559   0.32878   0.06000  Uiso   1.00
O100   O     0.75368   0.57901   0.30987   0.05764  Uani   1.00
C101   C     0.88328   0.60280   0.28117   0.06215  Uani   1.00
H102   H     0.85246   0.62969   0.25448   0.07300  Uiso   1.00
H103   H     0.95666   0.63448   0.28871   0.07300  Uiso   1.00
O104   O     0.86205   0.50297   0.26699   0.05985  Uani   1.00
H105   H     0.91347   0.48898   0.25499   0.08800  Uiso   1.00
C106   C     1.05950   0.63993   0.38063   0.05889  Uani   1.00
H107   H     1.03532   0.56370   0.37372   0.06900  Uiso   1.00
C108   C     1.12614   0.67857   0.42613   0.04951  Uani   1.00
H109   H     1.17349   0.63570   0.42605   0.05800  Uiso   1.00
O110   O     1.07786   0.66648   0.45938   0.04885  Uani   1.00
H111   H     1.11711   0.70395   0.48825   0.07100  Uiso   1.00
C112   C     1.18011   0.77964   0.43280   0.04962  Uani   1.00
H113   H     1.13582   0.82405   0.43853   0.05900  Uiso   1.00
O114   O     1.25313   0.81080   0.47143   0.05464  Uani   1.00
H115   H     1.29012   0.76596   0.47267   0.08000  Uiso   1.00
C116   C     1.21792   0.79720   0.39320   0.05700  Uani   1.00
H117   H     1.27494   0.76765   0.39201   0.06700  Uiso   1.00
O118   O     1.24925   0.89602   0.40104   0.05357  Uani   1.00
C119   C     1.14770   0.75398   0.34953   0.08116  Uani   1.00
H120   H     1.09617   0.79161   0.34762   0.09600  Uiso   1.00
O121   O     1.10538   0.65715   0.34682   0.07701  Uani   1.00
C122   C     1.18822   0.75650   0.30931   0.09656  Uani   1.00
H123   H     1.13487   0.71639   0.27999   0.11300  Uiso   1.00
H124   H     1.21038   0.82869   0.30661   0.11300  Uiso   1.00
O125   O     1.26520   0.72193   0.31163   0.15504  Uani   1.00
H126   H     1.24684   0.65524   0.31434   0.22700  Uiso   1.00
C127   C     1.33628   0.93630   0.39487   0.05144  Uani   1.00
H128   H     1.36978   0.88222   0.38718   0.06000  Uiso   1.00
C129   C     1.39131   1.00890   0.43674   0.04715  Uani   1.00
H130   H     1.46150   1.03098   0.43347   0.05500  Uiso   1.00
O131   O     1.39316   0.96890   0.47398   0.05112  Uani   1.00
H132   H     1.33737   0.91773   0.46944   0.07500  Uiso   1.00
C133   C     1.35731   1.09442   0.44525   0.04369  Uani   1.00
H134   H     1.29250   1.07530   0.45516   0.05100  Uiso   1.00
O135   O     1.42132   1.16582   0.47967   0.05038  Uani   1.00
H136   H     1.40893   1.15739   0.50823   0.07400  Uiso   1.00
C137   C     1.33990   1.13046   0.40373   0.04947  Uani   1.00
H138   H     1.40428   1.16681   0.39706   0.05800  Uiso   1.00
O139   O     1.28711   1.19376   0.41154   0.05333  Uani   1.00
C140   C     1.28553   1.04912   0.36393   0.05795  Uani   1.00
H141   H     1.21909   1.02026   0.37070   0.06800  Uiso   1.00
O142   O     1.33022   0.97743   0.35868   0.06344  Uani   1.00
C143   C     1.26812   1.07318   0.31925   0.09285  Uani   1.00
H144   H     1.21050   1.01736   0.29720   0.11000  Uiso   1.00
H145   H     1.24790   1.13758   0.32360   0.11000  Uiso   1.00
O146   O     1.34068   1.08004   0.29780   0.11250  Uani   1.00
H147   H     1.39299   1.13894   0.31260   0.16300  Uiso   1.00
O148   O    -0.09309  -0.02562   0.26538   0.23000  Uiso   1.00
H149   H    -0.05127   0.01795   0.25441   0.34900  Uiso   1.00
C150   C    -0.10980  -0.06459   0.33321   0.11500  Uiso   1.00
H151   H    -0.17595  -0.11205   0.31571   0.13700  Uiso   1.00
C152   C    -0.05825  -0.01347   0.30957   0.12200  Uiso   1.00
C153   C     0.02640   0.04802   0.33114   0.15000  Uiso   1.00
H154   H     0.06681   0.08936   0.31305   0.18000  Uiso   1.00
C155   C     0.05780   0.05702   0.37595   0.12000  Uiso   1.00
H156   H     0.12408   0.10505   0.39222   0.14400  Uiso   1.00
C157   C     0.00731   0.00692   0.40051   0.09100  Uiso   1.00
C158   C    -0.07818  -0.05482   0.37842   0.09100  Uiso   1.00
C159   C    -0.13832  -0.10912   0.40283   0.09700  Uiso   1.00
H160   H    -0.17136  -0.18040   0.38268   0.11600  Uiso   1.00
H161   H    -0.19352  -0.07751   0.40632   0.11600  Uiso   1.00
C162   C    -0.08956  -0.11074   0.44859   0.15000  Uiso   1.00
H163   H    -0.04736  -0.15844   0.44559   0.17700  Uiso   1.00
H164   H    -0.13947  -0.13847   0.46678   0.17700  Uiso   1.00
C165   C    -0.03007  -0.01311   0.47360   0.09600  Uiso   1.00
H166   H    -0.07285   0.03428   0.47280   0.11500  Uiso   1.00
C167   C     0.01394  -0.00412   0.52160   0.09400  Uiso   1.00
H168   H     0.06253  -0.04567   0.52072   0.11300  Uiso   1.00
C169   C    -0.04349  -0.03562   0.55368   0.11400  Uiso   1.00
H170   H    -0.06445  -0.11150   0.54862   0.13700  Uiso   1.00
H171   H    -0.10583  -0.01473   0.54909   0.13700  Uiso   1.00
C172   C     0.01878   0.01437   0.59996   0.14000  Uiso   1.00
H173   H    -0.01336   0.05603   0.62065   0.17400  Uiso   1.00
H174   H     0.03727  -0.03503   0.61816   0.17400  Uiso   1.00
C175   C     0.10320   0.08025   0.59202   0.13000  Uiso   1.00
H176   H     0.15556   0.04414   0.58955   0.15500  Uiso   1.00
O177   O     0.13810   0.16071   0.62809   0.13600  Uiso   1.00
H178   H     0.19706   0.19638   0.62562   0.20400  Uiso   1.00
C179   C     0.07089   0.09660   0.54591   0.11200  Uiso   1.00
C180   C     0.01511   0.16603   0.54963   0.18000  Uiso   1.00
H181   H    -0.04487   0.14112   0.56231   0.26700  Uiso   1.00
H182   H     0.05599   0.23200   0.57273   0.26700  Uiso   1.00
H183   H    -0.00797   0.18102   0.51786   0.26700  Uiso   1.00
C184   C     0.14576   0.12695   0.52197   0.11000  Uiso   1.00
H185   H     0.19181   0.08352   0.52529   0.13200  Uiso   1.00
H186   H     0.18704   0.19950   0.53697   0.13200  Uiso   1.00
C187   C     0.04512   0.01807   0.44934   0.08300  Uiso   1.00
H188   H     0.08683  -0.03042   0.45173   0.09900  Uiso   1.00
C189   C     0.10807   0.11606   0.47274   0.08900  Uiso   1.00
H190   H     0.07143   0.16753   0.46810   0.10600  Uiso   1.00
H191   H     0.16538   0.13266   0.45720   0.10600  Uiso   1.00
O192   O     0.46990   0.55310   0.44308   0.17866  Uani   1.00
O193   O     0.55367   0.42926   0.42508   0.18100  Uiso   1.00
O194   O     0.43183   0.39530   0.34338   0.13600  Uiso   1.00
O195   O     0.31104   0.57425   0.40227   0.17500  Uiso   1.00
O196   O     0.47169   0.22882   0.33480   0.10209  Uani   1.00
O197   O     0.60676   0.32108   0.30479   0.06700  Uiso   1.00
O198   O     0.56551   0.31150   0.47941   0.07400  Uiso   1.00
O199   O     0.35766   0.70129   0.48554   0.10600  Uiso   1.00
O200   O     0.22464   0.54765   0.31769   0.18200  Uiso   1.00
O201   O     0.38237   0.92487   0.27476   0.21300  Uiso   1.00
C202   C     0.68552  -0.30240   0.08202   0.06020  Uani   1.00
H203   H     0.67736  -0.37693   0.07907   0.06900  Uiso   1.00
C204   C     0.62780  -0.28944   0.04093   0.05671  Uani   1.00
H205   H     0.56040  -0.33878   0.03593   0.06600  Uiso   1.00
O206   O     0.66850  -0.31361   0.00544   0.06288  Uani   1.00
H207   H     0.63744  -0.30313  -0.02219   0.09100  Uiso   1.00
C208   C     0.61848  -0.19174   0.04651   0.04687  Uani   1.00
H209   H     0.68175  -0.14559   0.04299   0.05400  Uiso   1.00
O210   O     0.54554  -0.19299   0.01202   0.05114  Uani   1.00
H211   H     0.54628  -0.12507   0.01555   0.07500  Uiso   1.00
C212   C     0.60481  -0.14999   0.09209   0.05309  Uani   1.00
H213   H     0.53286  -0.17420   0.09272   0.06200  Uiso   1.00
O214   O     0.63493  -0.05120   0.09938   0.04664  Uani   1.00
C215   C     0.66302  -0.17360   0.12959   0.06589  Uani   1.00
H216   H     0.73385  -0.13518   0.13238   0.07700  Uiso   1.00
O217   O     0.65441  -0.27221   0.12019   0.07186  Uani   1.00
C218   C     0.63988  -0.14805   0.17391   0.09169  Uani   1.00
H219   H     0.63598  -0.07627   0.17991   0.10800  Uiso   1.00
H220   H     0.57293  -0.19384   0.17325   0.10800  Uiso   1.00
O221   O     0.70742  -0.15082   0.20939   0.17641  Uani   1.00
H222   H     0.72203  -0.20952   0.20227   0.26200  Uiso   1.00
C223   C     0.57177   0.00057   0.09915   0.04728  Uani   1.00
H224   H     0.50394  -0.04525   0.09646   0.05600  Uiso   1.00
C225   C     0.57154   0.04660   0.06032   0.04443  Uani   1.00
H226   H     0.52061   0.08448   0.06029   0.05300  Uiso   1.00
O227   O     0.54848  -0.02230   0.01983   0.04816  Uani   1.00
H228   H     0.48858  -0.02422   0.00187   0.07100  Uiso   1.00
C229   C     0.66350   0.11536   0.06548   0.04646  Uani   1.00
H230   H     0.71406   0.07670   0.06354   0.05500  Uiso   1.00
O231   O     0.65733   0.16091   0.03042   0.05462  Uani   1.00
H232   H     0.70448   0.22160   0.03879   0.08000  Uiso   1.00
C233   C     0.69061   0.18350   0.11082   0.04712  Uani   1.00
H234   H     0.64729   0.23017   0.11109   0.05600  Uiso   1.00
O235   O     0.78303   0.23682   0.11700   0.04924  Uani   1.00
C236   C     0.68139   0.13406   0.14850   0.04984  Uani   1.00
H237   H     0.73373   0.09758   0.15161   0.05900  Uiso   1.00
O238   O     0.59352   0.06778   0.13950   0.05089  Uani   1.00
C239   C     0.69433   0.20051   0.19309   0.06008  Uani   1.00
H240   H     0.68779   0.15977   0.21812   0.07100  Uiso   1.00
H241   H     0.76312   0.24837   0.20212   0.07100  Uiso   1.00
O242   O     0.63213   0.25421   0.19297   0.06539  Uani   1.00
H243   H     0.58040   0.22061   0.20371   0.09500  Uiso   1.00
C244   C     0.80404   0.33449   0.13208   0.05078  Uani   1.00
H245   H     0.74357   0.35278   0.13887   0.06000  Uiso   1.00
C246   C     0.83684   0.38069   0.09639   0.04823  Uani   1.00
H247   H     0.84624   0.45655   0.10744   0.05600  Uiso   1.00
O248   O     0.77018   0.34253   0.05688   0.05531  Uani   1.00
H249   H     0.76846   0.38971   0.03831   0.08100  Uiso   1.00
C250   C     0.92987   0.36994   0.09247   0.04637  Uani   1.00
H251   H     0.92377   0.29526   0.08205   0.05400  Uiso   1.00
O252   O     0.96577   0.41767   0.06211   0.05158  Uani   1.00
H253   H     0.93212   0.38453   0.03155   0.07600  Uiso   1.00
C254   C     0.99404   0.41099   0.13797   0.04854  Uani   1.00
H255   H     0.99874   0.48530   0.14867   0.05700  Uiso   1.00
O256   O     1.08097   0.40214   0.13457   0.04888  Uani   1.00
C257   C     0.95680   0.35900   0.17113   0.05951  Uani   1.00
H258   H     0.95289   0.28493   0.15950   0.07100  Uiso   1.00
O259   O     0.86831   0.36796   0.17277   0.06177  Uani   1.00
C260   C     1.01308   0.39103   0.21854   0.09133  Uani   1.00
H261   H     0.98624   0.33989   0.23662   0.10800  Uiso   1.00
H262   H     1.08280   0.39089   0.21823   0.10800  Uiso   1.00
O263   O     1.01124   0.47865   0.24308   0.12657  Uani   1.00
H264   H     1.03557   0.53045   0.22957   0.19000  Uiso   1.00
C265   C     1.15601   0.48321   0.15078   0.05456  Uani   1.00
H266   H     1.13290   0.54492   0.15974   0.06500  Uiso   1.00
C267   C     1.20885   0.49184   0.11473   0.05761  Uani   1.00
H268   H     1.26664   0.55499   0.12758   0.06700  Uiso   1.00
O269   O     1.15674   0.50561   0.07657   0.05849  Uani   1.00
H270   H     1.09432   0.46372   0.06960   0.08600  Uiso   1.00
C271   C     1.24500   0.40795   0.10482   0.05141  Uani   1.00
H272   H     1.18741   0.34450   0.09137   0.06100  Uiso   1.00
O273   O     1.30214   0.41593   0.07426   0.05881  Uani   1.00
H274   H     1.26570   0.40840   0.04416   0.08700  Uiso   1.00
C275   C     1.29966   0.39928   0.14777   0.05642  Uani   1.00
H276   H     1.36308   0.45657   0.15830   0.06600  Uiso   1.00
O277   O     1.31952   0.31207   0.13873   0.05685  Uani   1.00
C278   C     1.24827   0.40180   0.18501   0.06672  Uani   1.00
H279   H     1.19247   0.33662   0.17685   0.07900  Uiso   1.00
O280   O     1.21213   0.48010   0.18988   0.06184  Uani   1.00
C281   C     1.30701   0.41111   0.23008   0.04400  Uiso   1.00
H282   H     1.26603   0.41681   0.25483   0.05300  Uiso   1.00
H283   H     1.32949   0.34866   0.22970   0.05300  Uiso   1.00
O284   O     1.38646   0.48810   0.24194   0.06100  Uiso   1.00
H285   H     1.37082   0.54619   0.25055   0.09100  Uiso   1.00
C286   C     1.41138   0.31165   0.15011   0.05548  Uani   1.00
H287   H     1.45600   0.38356   0.16049   0.06600  Uiso   1.00
C288   C     1.43091   0.25707   0.10906   0.05590  Uani   1.00
H289   H     1.50072   0.25375   0.11755   0.06600  Uiso   1.00
O290   O     1.42634   0.30259   0.07395   0.06357  Uani   1.00
H291   H     1.37375   0.32736   0.07135   0.09400  Uiso   1.00
C292   C     1.36667   0.15855   0.09648   0.05083  Uani   1.00
H293   H     1.29693   0.16253   0.08885   0.06000  Uiso   1.00
O294   O     1.38395   0.10673   0.05825   0.05409  Uani   1.00
H295   H     1.35604   0.03982   0.05527   0.07900  Uiso   1.00
C296   C     1.37924   0.11468   0.13565   0.05068  Uani   1.00
H297   H     1.44487   0.10008   0.13949   0.06000  Uiso   1.00
O298   O     1.30768   0.02889   0.12576   0.05224  Uani   1.00
C299   C     1.37627   0.17657   0.17938   0.05034  Uani   1.00
H300   H     1.30510   0.17251   0.17922   0.06000  Uiso   1.00
O301   O     1.42797   0.27218   0.18592   0.05724  Uani   1.00
C302   C     1.41482   0.14553   0.21927   0.06201  Uani   1.00
H303   H     1.41863   0.19827   0.24898   0.07300  Uiso   1.00
H304   H     1.36884   0.07926   0.22021   0.07300  Uiso   1.00
O305   O     1.50186   0.13590   0.21700   0.05981  Uani   1.00
H306   H     1.51952   0.09747   0.23679   0.08800  Uiso   1.00
C307   C     1.33237  -0.05054   0.13264   0.05811  Uani   1.00
H308   H     1.40606  -0.03273   0.14402   0.06900  Uiso   1.00
C309   C     1.29977  -0.12708   0.08935   0.04915  Uani   1.00
H310   H     1.33414  -0.18018   0.09465   0.05800  Uiso   1.00
O311   O     1.32780  -0.08744   0.05507   0.04884  Uani   1.00
H312   H     1.29115  -0.12773   0.02620   0.07100  Uiso   1.00
C313   C     1.19813  -0.17325   0.07851   0.04931  Uani   1.00
H314   H     1.16270  -0.12552   0.06691   0.05900  Uiso   1.00
O315   O     1.17226  -0.25540   0.04321   0.05477  Uani   1.00
H316   H     1.21526  -0.29388   0.04825   0.08000  Uiso   1.00
C317   C     1.16588  -0.19823   0.11851   0.05655  Uani   1.00
H318   H     1.18988  -0.25652   0.12613   0.06700  Uiso   1.00
O319   O     1.06940  -0.22689   0.10632   0.05376  Uani   1.00
C320   C     1.20159  -0.11613   0.15916   0.08109  Uani   1.00
H321   H     1.17292  -0.05915   0.15371   0.09600  Uiso   1.00
O322   O     1.29850  -0.08355   0.16707   0.07650  Uani   1.00
C323   C     1.17882  -0.14338   0.20065   0.09686  Uani   1.00
H324   H     1.21982  -0.08713   0.22938   0.11300  Uiso   1.00
H325   H     1.10731  -0.15010   0.19950   0.11300  Uiso   1.00
O326   O     1.19186  -0.23037   0.20489   0.15471  Uani   1.00
H327   H     1.25495  -0.22992   0.20363   0.22700  Uiso   1.00
C328   C     1.02157  -0.31404   0.11160   0.05132  Uani   1.00
H329   H     1.06826  -0.35303   0.12168   0.06000  Uiso   1.00
C330   C     0.95574  -0.36830   0.06747   0.04766  Uani   1.00
H331   H     0.92152  -0.43753   0.07110   0.05500  Uiso   1.00
O332   O     1.00304  -0.38431   0.03383   0.05146  Uani   1.00
H333   H     1.05662  -0.33025   0.03923   0.07500  Uiso   1.00
C334   C     0.88552  -0.31690   0.05721   0.04392  Uani   1.00
H335   H     0.91979  -0.24773   0.05306   0.05100  Uiso   1.00
O336   O     0.82057  -0.36830   0.01816   0.05029  Uani   1.00
H337   H     0.77112  -0.33919   0.01320   0.07400  Uiso   1.00
C338   C     0.84110  -0.30274   0.09648   0.04957  Uani   1.00
H339   H     0.80616  -0.37184   0.10041   0.05800  Uiso   1.00
O340   O     0.77668  -0.25400   0.08669   0.05377  Uani   1.00
C341   C     0.91197  -0.24871   0.13882   0.05777  Uani   1.00
H342   H     0.94854  -0.18126   0.13374   0.06800  Uiso   1.00
O343   O     0.97483  -0.30191   0.14610   0.06258  Uani   1.00
C344   C     0.87710  -0.22505   0.18006   0.09127  Uani   1.00
H345   H     0.93522  -0.18982   0.20802   0.11000  Uiso   1.00
H346   H     0.84101  -0.17328   0.17523   0.11000  Uiso   1.00
O347   O     0.82371  -0.29964   0.19373   0.10982  Uani   1.00
H348   H     0.77961  -0.34697   0.16912   0.16300  Uiso   1.00
O349   O     0.46024   0.52299   0.03618   0.17629  Uani   1.00
O350   O     0.57200   0.42781   0.06404   0.18100  Uiso   1.00
O351   O     0.52030   0.60193   0.14992   0.13600  Uiso   1.00
O352   O     0.40447   0.69877   0.12387   0.17500  Uiso   1.00
O353   O     0.70667   0.51990   0.14201   0.10298  Uani   1.00
O354   O     0.68551   0.44203   0.20921   0.06700  Uiso   1.00
O355   O     0.76151   0.44850   0.50308   0.07400  Uiso   1.00
O356   O     0.28121   0.63907   0.04997   0.10600  Uiso   1.00
O357   O     0.36176   0.77057   0.20068   0.18200  Uiso   1.00
O358   O     0.05604   0.62837   0.21097   0.21300  Uiso   1.00
O359   O     0.55331   0.44603   0.26429   0.09521  Uani   1.00
O360   O     0.38029   0.67920   0.26339   0.20900  Uiso   1.00
H361   H     0.33575   0.67150   0.50848   0.00000  Uiso   1.00
H362   H     0.42244   0.73540   0.49728   0.00000  Uiso   1.00
H363   H     0.32176   0.62381   0.42913   0.00000  Uiso   1.00
H364   H     0.36411   0.55159   0.40919   0.00000  Uiso   1.00
H365   H     0.16041   0.53755   0.31621   0.00000  Uiso   1.00
H366   H     0.25357   0.55692   0.34945   0.00000  Uiso   1.00
H367   H     0.37345   0.38185   0.35152   0.00000  Uiso   1.00
H368   H     0.47686   0.41180   0.37162   0.00000  Uiso   1.00
H369   H     0.45066   0.28526   0.33602   0.00000  Uiso   1.00
H370   H     0.52573   0.24655   0.32226   0.00000  Uiso   1.00
H371   H     0.46499   0.56287   0.47384   0.00000  Uiso   1.00
H372   H     0.50305   0.50413   0.43918   0.00000  Uiso   1.00
H373   H     0.51145   0.26118   0.47942   0.00000  Uiso   1.00
H374   H     0.58269   0.35278   0.50933   0.00000  Uiso   1.00
H375   H     0.55964   0.38583   0.44448   0.00000  Uiso   1.00
H376   H     0.61477   0.46484   0.42355   0.00000  Uiso   1.00
H377   H     0.36464   0.89336   0.29714   0.00000  Uiso   1.00
H378   H     0.36728   0.98562   0.28349   0.00000  Uiso   1.00
H379   H     0.58202   0.36206   0.28862   0.00000  Uiso   1.00
H380   H     0.66876   0.32964   0.30116   0.00000  Uiso   1.00
H381   H     0.49788   0.46345   0.25610   0.00000  Uiso   1.00
H382   H     0.59061   0.46054   0.24336   0.00000  Uiso   1.00
H383   H     0.66539   0.37263   0.20363   0.00000  Uiso   1.00
H384   H     0.74487   0.46187   0.23026   0.00000  Uiso   1.00
H385   H     0.69544   0.49114   0.16768   0.00000  Uiso   1.00
H386   H     0.75794   0.50076   0.13467   0.00000  Uiso   1.00
H387   H     0.78096   0.51768   0.50867   0.00000  Uiso   1.00
H388   H     0.80170   0.42824   0.48536   0.00000  Uiso   1.00
H389   H     0.52239   0.38093   0.07047   0.00000  Uiso   1.00
H390   H     0.61743   0.45665   0.09224   0.00000  Uiso   1.00
H391   H     0.53944   0.61155   0.18221   0.00000  Uiso   1.00
H392   H     0.57276   0.63668   0.14103   0.00000  Uiso   1.00
H393   H     0.42097   0.52464   0.05687   0.00000  Uiso   1.00
H394   H     0.50817   0.49739   0.04976   0.00000  Uiso   1.00
H395   H     0.23831   0.58005   0.05021   0.00000  Uiso   1.00
H396   H     0.32749   0.65834   0.07912   0.00000  Uiso   1.00
H397   H     0.38937   0.72783   0.15125   0.00000  Uiso   1.00
H398   H     0.44423   0.66103   0.13330   0.00000  Uiso   1.00
H399   H     0.38428   0.83620   0.21683   0.00000  Uiso   1.00
H400   H     0.37287   0.73487   0.22356   0.00000  Uiso   1.00
H401   H     0.33139   0.69362   0.27745   0.00000  Uiso   1.00
H402   H     0.43718   0.71870   0.28446   0.00000  Uiso   1.00
H403   H     0.00785   0.64439   0.19294   0.00000  Uiso   1.00
H404   H     0.11100   0.67700   0.21063   0.00000  Uiso   1.00
C405   C     1.32236   1.28576   0.90861   0.06026  Uani   1.00
H406   H     1.39280   1.29827   0.90592   0.06900  Uiso   1.00
C407   C     1.31689   1.35539   0.94900   0.05643  Uani   1.00
H408   H     1.34628   1.42473   0.94382   0.06600  Uiso   1.00
O409   O     1.36732   1.34414   0.98768   0.06229  Uani   1.00
H410   H     1.40161   1.40767   1.00520   0.09100  Uiso   1.00
C411   C     1.21904   1.34651   0.95071   0.04694  Uani   1.00
H412   H     1.18610   1.27613   0.95363   0.05400  Uiso   1.00
O413   O     1.21757   1.41375   0.98860   0.05084  Uani   1.00
H414   H     1.15580   1.41953   0.98652   0.07500  Uiso   1.00
C415   C     1.17022   1.36124   0.90791   0.05310  Uani   1.00
H416   H     1.19744   1.43431   0.90666   0.06200  Uiso   1.00
O417   O     1.07667   1.34113   0.90848   0.04675  Uani   1.00
C418   C     1.18181   1.29554   0.86755   0.06606  Uani   1.00
H419   H     1.14659   1.22381   0.86759   0.07700  Uiso   1.00
O420   O     1.27606   1.30356   0.86947   0.07159  Uani   1.00
C421   C     1.14484   1.31467   0.82382   0.09199  Uani   1.00
H422   H     1.07500   1.31601   0.82207   0.10800  Uiso   1.00
H423   H     1.18461   1.38344   0.82173   0.10800  Uiso   1.00
O424   O     1.14246   1.24381   0.78658   0.17740  Uani   1.00
H425   H     1.20449   1.24768   0.78516   0.26200  Uiso   1.00
C426   C     1.03480   1.41189   0.90525   0.04722  Uani   1.00
H427   H     1.08600   1.47746   0.90769   0.05600  Uiso   1.00
C428   C     0.98555   1.42309   0.94254   0.04444  Uani   1.00
H429   H     0.95147   1.47665   0.93894   0.05300  Uiso   1.00
O430   O     1.04942   1.45174   0.98408   0.04827  Uani   1.00
H431   H     1.03826   1.50594   1.00189   0.07100  Uiso   1.00
C432   C     0.91438   1.33165   0.93754   0.04666  Uani   1.00
H433   H     0.94654   1.27576   0.93974   0.05500  Uiso   1.00
O434   O     0.86763   1.34194   0.97227   0.05407  Uani   1.00
H435   H     0.80749   1.29373   0.96352   0.08000  Uiso   1.00
C436   C     0.85054   1.30721   0.89203   0.04720  Uani   1.00
H437   H     0.81315   1.35924   0.89131   0.05600  Uiso   1.00
O438   O     0.78978   1.21706   0.88626   0.04918  Uani   1.00
C439   C     0.90195   1.30672   0.85474   0.04982  Uani   1.00
H440   H     0.93018   1.24709   0.85262   0.05900  Uiso   1.00
O441   O     0.97435   1.39184   0.86367   0.05073  Uani   1.00
C442   C     0.84286   1.29547   0.80944   0.06012  Uani   1.00
H443   H     0.88603   1.29888   0.78547   0.07100  Uiso   1.00
H444   H     0.79395   1.22580   0.79992   0.07100  Uiso   1.00
O445   O     0.79337   1.36160   0.80815   0.06463  Uani   1.00
H446   H     0.82366   1.41322   0.79637   0.09500  Uiso   1.00
C447   C     0.69593   1.20642   0.87270   0.05062  Uani   1.00
H448   H     0.68535   1.27185   0.86679   0.06000  Uiso   1.00
C449   C     0.64871   1.17753   0.90838   0.04782  Uani   1.00
H450   H     0.57848   1.17932   0.89906   0.05600  Uiso   1.00
O451   O     0.69253   1.24097   0.94991   0.05506  Uani   1.00
H452   H     0.64840   1.26912   0.96226   0.08100  Uiso   1.00
C453   C     0.64829   1.07864   0.91130   0.04565  Uani   1.00
H454   H     0.71911   1.07758   0.92083   0.05400  Uiso   1.00
O455   O     0.59953   1.04916   0.94191   0.05124  Uani   1.00
H456   H     0.62676   1.09153   0.97154   0.07600  Uiso   1.00
C457   C     0.60601   1.01184   0.86581   0.04832  Uani   1.00
H458   H     0.53443   1.00912   0.85591   0.05700  Uiso   1.00
O459   O     0.61127   0.92055   0.86993   0.04846  Uani   1.00
C460   C     0.65861   1.04667   0.83222   0.05990  Uani   1.00
H461   H     0.72862   1.04419   0.84282   0.07100  Uiso   1.00
O462   O     0.65823   1.14047   0.83203   0.06236  Uani   1.00
C463   C     0.62558   0.99292   0.78381   0.09251  Uani   1.00
H464   H     0.67762   1.01978   0.76659   0.10800  Uiso   1.00
H465   H     0.62038   0.91906   0.78124   0.10800  Uiso   1.00
O466   O     0.54390   1.00344   0.76104   0.12831  Uani   1.00
H467   H     0.49134   0.96970   0.77087   0.19000  Uiso   1.00
C468   C     0.53512   0.84499   0.85184   0.05480  Uani   1.00
H469   H     0.47509   0.86800   0.84271   0.06500  Uiso   1.00
C470   C     0.51819   0.77875   0.88280   0.05778  Uani   1.00
H471   H     0.45884   0.71963   0.86382   0.06700  Uiso   1.00
O472   O     0.49654   0.82327   0.92091   0.05888  Uani   1.00
H473   H     0.52994   0.81178   0.94736   0.08600  Uiso   1.00
C474   C     0.59976   0.74255   0.89170   0.05164  Uani   1.00
H475   H     0.65990   0.80211   0.90750   0.06100  Uiso   1.00
O476   O     0.59467   0.68546   0.92265   0.05956  Uani   1.00
H477   H     0.53472   0.64125   0.91999   0.08700  Uiso   1.00
C478   C     0.61587   0.69218   0.84834   0.05642  Uani   1.00
H479   H     0.56151   0.62637   0.83360   0.06600  Uiso   1.00
O480   O     0.70039   0.67395   0.85951   0.05728  Uani   1.00
C481   C     0.62117   0.75568   0.81598   0.06666  Uani   1.00
H482   H     0.68137   0.81603   0.83061   0.07900  Uiso   1.00
O483   O     0.54283   0.79017   0.81079   0.06216  Uani   1.00
C484   C     0.63049   0.71495   0.77005   0.04400  Uiso   1.00
H485   H     0.64247   0.77180   0.75311   0.05300  Uiso   1.00
H486   H     0.68963   0.68883   0.77303   0.05300  Uiso   1.00
O487   O     0.55626   0.63763   0.74372   0.06100  Uiso   1.00
H488   H     0.49990   0.65258   0.74470   0.09100  Uiso   1.00
C489   C     0.70568   0.58203   0.84305   0.05599  Uani   1.00
H490   H     0.63805   0.53453   0.82720   0.06600  Uiso   1.00
C491   C     0.74998   0.55173   0.88239   0.05625  Uani   1.00
H492   H     0.74862   0.47885   0.87083   0.06600  Uiso   1.00
O493   O     0.69885   0.55361   0.91541   0.06362  Uani   1.00
H494   H     0.67772   0.60930   0.91776   0.09400  Uiso   1.00
C495   C     0.84758   0.61194   0.90022   0.05101  Uani   1.00
H496   H     0.84832   0.68446   0.91322   0.06000  Uiso   1.00
O497   O     0.88800   0.57724   0.93417   0.05374  Uani   1.00
H498   H     0.94789   0.62058   0.94858   0.07900  Uiso   1.00
C499   C     0.89728   0.60887   0.86273   0.05120  Uani   1.00
H500   H     0.90534   0.53866   0.85400   0.06000  Uiso   1.00
O501   O     0.98533   0.67608   0.87884   0.05298  Uani   1.00
C502   C     0.84783   0.63013   0.82159   0.05078  Uani   1.00
H503   H     0.85650   0.70585   0.82844   0.06000  Uiso   1.00
O504   O     0.75353   0.57920   0.80946   0.05764  Uani   1.00
C505   C     0.88329   0.60311   0.78086   0.06215  Uani   1.00
H506   H     0.85235   0.62977   0.75410   0.07300  Uiso   1.00
H507   H     0.95663   0.63503   0.78845   0.07300  Uiso   1.00
O508   O     0.86235   0.50329   0.76679   0.05985  Uani   1.00
H509   H     0.91404   0.48933   0.75505   0.08800  Uiso   1.00
C510   C     1.05930   0.63998   0.88013   0.05889  Uani   1.00
H511   H     1.03506   0.56375   0.87311   0.06900  Uiso   1.00
C512   C     1.12609   0.67837   0.92563   0.04951  Uani   1.00
H513   H     1.17337   0.63545   0.92545   0.05800  Uiso   1.00
O514   O     1.07797   0.66617   0.95893   0.04885  Uani   1.00
H515   H     1.11712   0.70367   0.98781   0.07100  Uiso   1.00
C516   C     1.18010   0.77941   0.93240   0.04962  Uani   1.00
H517   H     1.13588   0.82384   0.93826   0.05900  Uiso   1.00
O518   O     1.25324   0.81044   0.97098   0.05464  Uani   1.00
H519   H     1.29025   0.76560   0.97217   0.08000  Uiso   1.00
C520   C     1.21766   0.79707   0.89275   0.05700  Uani   1.00
H521   H     1.27457   0.76741   0.89144   0.06700  Uiso   1.00
O522   O     1.24912   0.89587   0.90068   0.05357  Uani   1.00
C523   C     1.14734   0.75419   0.84910   0.08116  Uani   1.00
H524   H     1.09595   0.79199   0.84727   0.09600  Uiso   1.00
O525   O     1.10492   0.65738   0.84627   0.07701  Uani   1.00
C526   C     1.18786   0.75677   0.80889   0.09656  Uani   1.00
H527   H     1.13440   0.71714   0.77953   0.11300  Uiso   1.00
H528   H     1.21058   0.82902   0.80635   0.11300  Uiso   1.00
O529   O     1.26433   0.72144   0.81108   0.15504  Uani   1.00
H530   H     1.24532   0.65460   0.81347   0.22700  Uiso   1.00
C531   C     1.33611   0.93604   0.89447   0.05144  Uani   1.00
H532   H     1.36960   0.88191   0.88682   0.06000  Uiso   1.00
C533   C     1.39112   1.00874   0.93632   0.04715  Uani   1.00
H534   H     1.46134   1.03085   0.93308   0.05500  Uiso   1.00
O535   O     1.39292   0.96888   0.97361   0.05112  Uani   1.00
H536   H     1.33726   0.91745   0.96901   0.07500  Uiso   1.00
C537   C     1.35705   1.09424   0.94474   0.04369  Uani   1.00
H538   H     1.29230   1.07512   0.95470   0.05100  Uiso   1.00
O539   O     1.42102   1.16575   0.97912   0.05038  Uani   1.00
H540   H     1.40874   1.15744   1.00772   0.07400  Uiso   1.00
C541   C     1.33953   1.13008   0.90315   0.04947  Uani   1.00
H542   H     1.40386   1.16635   0.89642   0.05800  Uiso   1.00
O543   O     1.28675   1.19346   0.91088   0.05333  Uani   1.00
C544   C     1.28514   1.04858   0.86339   0.05795  Uani   1.00
H545   H     1.21875   1.01966   0.87021   0.06800  Uiso   1.00
O546   O     1.32997   0.97696   0.85821   0.06344  Uani   1.00
C547   C     1.26762   1.07246   0.81868   0.09285  Uani   1.00
H548   H     1.21011   1.01650   0.79662   0.11000  Uiso   1.00
H549   H     1.24725   1.13678   0.82294   0.11000  Uiso   1.00
O550   O     1.34028   1.07940   0.79728   0.11250  Uani   1.00
H551   H     1.39253   1.13824   0.81219   0.16300  Uiso   1.00
O552   O    -0.09333  -0.02476   0.76433   0.23000  Uiso   1.00
H553   H    -0.05131   0.01886   0.75344   0.34900  Uiso   1.00
C554   C    -0.11026  -0.06432   0.83202   0.11500  Uiso   1.00
H555   H    -0.17651  -0.11150   0.81450   0.13700  Uiso   1.00
C556   C    -0.05857  -0.01312   0.80845   0.12200  Uiso   1.00
C557   C     0.02622   0.04799   0.83007   0.15000  Uiso   1.00
H558   H     0.06670   0.08934   0.81201   0.18000  Uiso   1.00
C559   C     0.05758   0.05666   0.87486   0.12000  Uiso   1.00
H560   H     0.12394   0.10450   0.89116   0.14400  Uiso   1.00
C561   C     0.00695   0.00657   0.89939   0.09100  Uiso   1.00
C562   C    -0.07865  -0.05489   0.87724   0.09100  Uiso   1.00
C563   C    -0.13886  -0.10923   0.90161   0.09700  Uiso   1.00
H564   H    -0.17193  -0.18049   0.88142   0.11600  Uiso   1.00
H565   H    -0.19407  -0.07762   0.90507   0.11600  Uiso   1.00
C566   C    -0.09023  -0.11098   0.94739   0.15000  Uiso   1.00
H567   H    -0.04816  -0.15881   0.94437   0.17700  Uiso   1.00
H568   H    -0.14021  -0.13867   0.96556   0.17700  Uiso   1.00
C569   C    -0.03058  -0.01348   0.97252   0.09600  Uiso   1.00
H570   H    -0.07322   0.03404   0.97170   0.11500  Uiso   1.00
C571   C     0.01333  -0.00453   1.02060   0.09400  Uiso   1.00
H572   H     0.06186  -0.04616   1.01974   0.11300  Uiso   1.00
C573   C    -0.04412  -0.03590   1.05271   0.11400  Uiso   1.00
H574   H    -0.06518  -0.11178   1.04768   0.13700  Uiso   1.00
H575   H    -0.10642  -0.01494   1.04810   0.13700  Uiso   1.00
C576   C     0.01810   0.01403   1.09902   0.14000  Uiso   1.00
H577   H    -0.01406   0.05568   1.11970   0.17400  Uiso   1.00
H578   H     0.03655  -0.03540   1.11722   0.17400  Uiso   1.00
C579   C     0.10258   0.07993   1.09115   0.13000  Uiso   1.00
H580   H     0.15499   0.04385   1.08877   0.15500  Uiso   1.00
O581   O     0.13737   0.16038   1.12725   0.13600  Uiso   1.00
H582   H     0.19639   0.19606   1.12484   0.20400  Uiso   1.00
C583   C     0.07039   0.09619   1.04496   0.11200  Uiso   1.00
C584   C     0.01467   0.16565   1.04860   0.18000  Uiso   1.00
H585   H    -0.04545   0.14078   1.06120   0.26700  Uiso   1.00
H586   H     0.05545   0.23165   1.07171   0.26700  Uiso   1.00
H587   H    -0.00824   0.18058   1.01680   0.26700  Uiso   1.00
C588   C     0.14531   0.12638   1.02101   0.11000  Uiso   1.00
H589   H     0.19132   0.08291   1.02440   0.13200  Uiso   1.00
H590   H     0.18665   0.19889   1.03604   0.13200  Uiso   1.00
C591   C     0.04468   0.01758   0.94827   0.08300  Uiso   1.00
H592   H     0.08626  -0.03105   0.95065   0.09900  Uiso   1.00
C593   C     0.10776   0.11549   0.97174   0.08900  Uiso   1.00
H594   H     0.07121   0.16699   0.96707   0.10600  Uiso   1.00
H595   H     0.16508   0.13203   0.95620   0.10600  Uiso   1.00
O596   O     0.46898   0.55289   0.94195   0.17866  Uani   1.00
O597   O     0.55299   0.42924   0.92428   0.18100  Uiso   1.00
O598   O     0.43115   0.39456   0.84247   0.13600  Uiso   1.00
O599   O     0.30994   0.57405   0.90101   0.17500  Uiso   1.00
O600   O     0.47113   0.22820   0.83460   0.10209  Uani   1.00
O601   O     0.60671   0.32184   0.80535   0.06700  Uiso   1.00
O602   O     0.56500   0.31139   0.97866   0.07400  Uiso   1.00
O603   O     0.35771   0.70082   0.98483   0.10600  Uiso   1.00
O604   O     0.22296   0.54665   0.81629   0.18200  Uiso   1.00
O605   O     0.38251   0.92432   0.77458   0.21300  Uiso   1.00
C606   C     0.68567  -0.30257   0.58237   0.06020  Uani   1.00
H607   H     0.67756  -0.37710   0.57942   0.06900  Uiso   1.00
C608   C     0.62785  -0.28960   0.54134   0.05671  Uani   1.00
H609   H     0.56044  -0.33885   0.53644   0.06600  Uiso   1.00
O610   O     0.66847  -0.31385   0.50584   0.06288  Uani   1.00
H611   H     0.63737  -0.30317   0.47830   0.09100  Uiso   1.00
C612   C     0.61857  -0.19184   0.54693   0.04687  Uani   1.00
H613   H     0.68190  -0.14571   0.54343   0.05400  Uiso   1.00
O614   O     0.54565  -0.19299   0.51247   0.05114  Uani   1.00
H615   H     0.54644  -0.12507   0.51599   0.07500  Uiso   1.00
C616   C     0.60493  -0.15006   0.59252   0.05309  Uani   1.00
H617   H     0.53299  -0.17421   0.59318   0.06200  Uiso   1.00
O618   O     0.63511  -0.05127   0.59976   0.04664  Uani   1.00
C619   C     0.66321  -0.17377   0.62998   0.06589  Uani   1.00
H620   H     0.73402  -0.13538   0.63271   0.07700  Uiso   1.00
O621   O     0.65462  -0.27239   0.62055   0.07186  Uani   1.00
C622   C     0.64031  -0.14830   0.67437   0.09169  Uani   1.00
H623   H     0.63616  -0.07659   0.68038   0.10800  Uiso   1.00
H624   H     0.57348  -0.19425   0.67381   0.10800  Uiso   1.00
O625   O     0.70816  -0.15086   0.70977   0.17641  Uani   1.00
H626   H     0.72333  -0.20926   0.70258   0.26200  Uiso   1.00
C627   C     0.57206   0.00065   0.59953   0.04728  Uani   1.00
H628   H     0.50419  -0.04510   0.59681   0.05600  Uiso   1.00
C629   C     0.57195   0.04679   0.56074   0.04443  Uani   1.00
H630   H     0.52112   0.08480   0.56079   0.05300  Uiso   1.00
O631   O     0.54872  -0.02211   0.52025   0.04816  Uani   1.00
H632   H     0.48888  -0.02380   0.50235   0.07100  Uiso   1.00
C633   C     0.66399   0.11543   0.56589   0.04646  Uani   1.00
H634   H     0.71448   0.07666   0.56398   0.05500  Uiso   1.00
O635   O     0.65798   0.16101   0.53084   0.05462  Uani   1.00
H636   H     0.70500   0.22182   0.53935   0.08000  Uiso   1.00
C637   C     0.69109   0.18357   0.61123   0.04712  Uani   1.00
H638   H     0.64782   0.23031   0.61146   0.05600  Uiso   1.00
O639   O     0.78355   0.23684   0.61747   0.04924  Uani   1.00
C640   C     0.68172   0.13413   0.64890   0.04984  Uani   1.00
H641   H     0.73404   0.09764   0.65205   0.05900  Uiso   1.00
O642   O     0.59383   0.06788   0.63988   0.05089  Uani   1.00
C643   C     0.69458   0.20059   0.69348   0.06008  Uani   1.00
H644   H     0.68798   0.15985   0.71851   0.07100  Uiso   1.00
H645   H     0.76336   0.24846   0.70254   0.07100  Uiso   1.00
O646   O     0.63235   0.25425   0.69331   0.06539  Uani   1.00
H647   H     0.58058   0.22055   0.70397   0.09500  Uiso   1.00
C648   C     0.80469   0.33451   0.63266   0.05078  Uani   1.00
H649   H     0.74430   0.35282   0.63954   0.06000  Uiso   1.00
C650   C     0.83735   0.38082   0.59697   0.04823  Uani   1.00
H651   H     0.84686   0.45669   0.60810   0.05600  Uiso   1.00
O652   O     0.77049   0.34278   0.55752   0.05531  Uani   1.00
H653   H     0.76896   0.38994   0.53892   0.08100  Uiso   1.00
C654   C     0.93031   0.37001   0.59294   0.04637  Uani   1.00
H655   H     0.92414   0.29532   0.58253   0.05400  Uiso   1.00
O656   O     0.96613   0.41773   0.56257   0.05158  Uani   1.00
H657   H     0.93245   0.38449   0.53204   0.07600  Uiso   1.00
C658   C     0.99456   0.41107   0.63841   0.04854  Uani   1.00
H659   H     0.99922   0.48536   0.64910   0.05700  Uiso   1.00
O660   O     1.08147   0.40233   0.63492   0.04888  Uani   1.00
C661   C     0.95756   0.35906   0.67162   0.05951  Uani   1.00
H662   H     0.95381   0.28504   0.66000   0.07100  Uiso   1.00
O663   O     0.86905   0.36783   0.67332   0.06177  Uani   1.00
C664   C     1.01398   0.39117   0.71902   0.09133  Uani   1.00
H665   H     0.98717   0.34013   0.73715   0.10800  Uiso   1.00
H666   H     1.08364   0.39091   0.71864   0.10800  Uiso   1.00
O667   O     1.01236   0.47888   0.74358   0.12657  Uani   1.00
H668   H     1.03625   0.53052   0.72987   0.19000  Uiso   1.00
C669   C     1.15647   0.48342   0.65121   0.05456  Uani   1.00
H670   H     1.13330   0.54509   0.66017   0.06500  Uiso   1.00
C671   C     1.20933   0.49212   0.61517   0.05761  Uani   1.00
H672   H     1.26711   0.55529   0.62803   0.06700  Uiso   1.00
O673   O     1.15714   0.50582   0.57701   0.05849  Uani   1.00
H674   H     1.09476   0.46389   0.57010   0.08600  Uiso   1.00
C675   C     1.24548   0.40819   0.60527   0.05141  Uani   1.00
H676   H     1.18785   0.34475   0.59185   0.06100  Uiso   1.00
O677   O     1.30263   0.41614   0.57473   0.05881  Uani   1.00
H678   H     1.26602   0.40850   0.54464   0.08700  Uiso   1.00
C679   C     1.30008   0.39943   0.64823   0.05642  Uani   1.00
H680   H     1.36355   0.45666   0.65880   0.06600  Uiso   1.00
O681   O     1.31981   0.31213   0.63913   0.05685  Uani   1.00
C682   C     1.24857   0.40191   0.68544   0.06672  Uani   1.00
H683   H     1.19272   0.33676   0.67721   0.07900  Uiso   1.00
O684   O     1.21252   0.48026   0.69030   0.06184  Uani   1.00
C685   C     1.30714   0.41109   0.73054   0.04400  Uiso   1.00
H686   H     1.26597   0.41648   0.75522   0.05300  Uiso   1.00
H687   H     1.32982   0.34875   0.73013   0.05300  Uiso   1.00
O688   O     1.38640   0.48827   0.74256   0.06100  Uiso   1.00
H689   H     1.37047   0.54626   0.75100   0.09100  Uiso   1.00
C690   C     1.41165   0.31152   0.65052   0.05548  Uani   1.00
H691   H     1.45637   0.38339   0.66096   0.06600  Uiso   1.00
C692   C     1.43116   0.25702   0.60943   0.05590  Uani   1.00
H693   H     1.50094   0.25365   0.61793   0.06600  Uiso   1.00
O694   O     1.42664   0.30274   0.57440   0.06357  Uani   1.00
H695   H     1.37411   0.32759   0.57190   0.09400  Uiso   1.00
C696   C     1.36685   0.15852   0.59678   0.05083  Uani   1.00
H697   H     1.29713   0.16257   0.58921   0.06000  Uiso   1.00
O698   O     1.38410   0.10674   0.55853   0.05409  Uani   1.00
H699   H     1.35611   0.03985   0.55555   0.07900  Uiso   1.00
C700   C     1.37938   0.11450   0.63592   0.05068  Uani   1.00
H701   H     1.44498   0.09985   0.63975   0.06000  Uiso   1.00
O702   O     1.30777   0.02871   0.62597   0.05224  Uani   1.00
C703   C     1.37643   0.17629   0.67969   0.05034  Uani   1.00
H704   H     1.30528   0.17219   0.67958   0.06000  Uiso   1.00
O705   O     1.42811   0.27192   0.68628   0.05724  Uani   1.00
C706   C     1.41507   0.14514   0.71953   0.06201  Uani   1.00
H707   H     1.41880   0.19775   0.74929   0.07300  Uiso   1.00
H708   H     1.36916   0.07878   0.72042   0.07300  Uiso   1.00
O709   O     1.50220   0.13574   0.71728   0.05981  Uani   1.00
H710   H     1.51963   0.09656   0.73672   0.08800  Uiso   1.00
C711   C     1.33238  -0.05076   0.63286   0.05811  Uani   1.00
H712   H     1.40609  -0.03307   0.64418   0.06900  Uiso   1.00
C713   C     1.29968  -0.12727   0.58956   0.04915  Uani   1.00
H714   H     1.33394  -0.18047   0.59487   0.05800  Uiso   1.00
O715   O     1.32780  -0.08757   0.55532   0.04884  Uani   1.00
H716   H     1.29098  -0.12784   0.52647   0.07100  Uiso   1.00
C717   C     1.19799  -0.17333   0.57873   0.04931  Uani   1.00
H718   H     1.16262  -0.12549   0.56720   0.05900  Uiso   1.00
O719   O     1.17200  -0.25547   0.54341   0.05477  Uani   1.00
H720   H     1.21496  -0.29398   0.54849   0.08000  Uiso   1.00
C721   C     1.16584  -0.19841   0.61872   0.05655  Uani   1.00
H722   H     1.18985  -0.25674   0.62628   0.06700  Uiso   1.00
O723   O     1.06936  -0.22709   0.60655   0.05376  Uani   1.00
C724   C     1.20166  -0.11636   0.65941   0.08109  Uani   1.00
H725   H     1.17300  -0.05933   0.65404   0.09600  Uiso   1.00
O726   O     1.29855  -0.08377   0.66729   0.07650  Uani   1.00
C727   C     1.17892  -0.14377   0.70088   0.09686  Uani   1.00
H728   H     1.22000  -0.08763   0.72965   0.11300  Uiso   1.00
H729   H     1.10743  -0.15042   0.69977   0.11300  Uiso   1.00
O730   O     1.19187  -0.23087   0.70499   0.15471  Uani   1.00
H731   H     1.25492  -0.23053   0.70363   0.22700  Uiso   1.00
C732   C     1.02159  -0.31419   0.61191   0.05132  Uani   1.00
H733   H     1.06829  -0.35311   0.62204   0.06000  Uiso   1.00
C734   C     0.95578  -0.36857   0.56781   0.04766  Uani   1.00
H735   H     0.92156  -0.43771   0.57151   0.05500  Uiso   1.00
O736   O     1.00316  -0.38466   0.53423   0.05146  Uani   1.00
H737   H     1.05653  -0.33044   0.53953   0.07500  Uiso   1.00
C738   C     0.88559  -0.31715   0.55749   0.04392  Uani   1.00
H739   H     0.91988  -0.24802   0.55329   0.05100  Uiso   1.00
O740   O     0.82061  -0.36866   0.51847   0.05029  Uani   1.00
H741   H     0.77121  -0.33950   0.51351   0.07400  Uiso   1.00
C742   C     0.84123  -0.30282   0.59676   0.04957  Uani   1.00
H743   H     0.80635  -0.37183   0.60081   0.05800  Uiso   1.00
O744   O     0.77680  -0.25416   0.58692   0.05377  Uani   1.00
C745   C     0.91213  -0.24861   0.63907   0.05777  Uani   1.00
H746   H     0.94882  -0.18133   0.63388   0.06800  Uiso   1.00
O747   O     0.97485  -0.30192   0.64641   0.06258  Uani   1.00
C748   C     0.87743  -0.22438   0.68030   0.09127  Uani   1.00
H749   H     0.93563  -0.18953   0.70826   0.11000  Uiso   1.00
H750   H     0.84201  -0.17209   0.67547   0.11000  Uiso   1.00
O751   O     0.82318  -0.29838   0.69401   0.10982  Uani   1.00
H752   H     0.77974  -0.34622   0.66935   0.16300  Uiso   1.00
O753   O     0.46030   0.52279   0.53680   0.17629  Uani   1.00
O754   O     0.57237   0.42781   0.56448   0.18100  Uiso   1.00
O755   O     0.52013   0.60151   0.64979   0.13600  Uiso   1.00
O756   O     0.40489   0.69906   0.62392   0.17500  Uiso   1.00
O757   O     0.70720   0.52042   0.64225   0.10298  Uani   1.00
O758   O     0.68537   0.44207   0.70923   0.06700  Uiso   1.00
O759   O     0.76099   0.44859   1.00247   0.07400  Uiso   1.00
O760   O     0.28100   0.63913   0.55036   0.10600  Uiso   1.00
O761   O     0.36146   0.76996   0.70059   0.18200  Uiso   1.00
O762   O     0.05613   0.62793   0.71094   0.21300  Uiso   1.00
O763   O     0.55283   0.44578   0.76434   0.09521  Uani   1.00
O764   O     0.37978   0.67862   0.76325   0.20900  Uiso   1.00
H765   H     0.33592   0.67120   1.00784   0.00000  Uiso   1.00
H766   H     0.42246   0.73507   0.99658   0.00000  Uiso   1.00
H767   H     0.32084   0.62342   0.92795   0.00000  Uiso   1.00
H768   H     0.36296   0.55128   0.90780   0.00000  Uiso   1.00
H769   H     0.15847   0.53563   0.81432   0.00000  Uiso   1.00
H770   H     0.25133   0.55591   0.84809   0.00000  Uiso   1.00
H771   H     0.37286   0.38126   0.85070   0.00000  Uiso   1.00
H772   H     0.47630   0.41146   0.87069   0.00000  Uiso   1.00
H773   H     0.44992   0.28453   0.83563   0.00000  Uiso   1.00
H774   H     0.52538   0.24613   0.82225   0.00000  Uiso   1.00
H775   H     0.46415   0.56299   0.97273   0.00000  Uiso   1.00
H776   H     0.50221   0.50393   0.93817   0.00000  Uiso   1.00
H777   H     0.51104   0.26099   0.97870   0.00000  Uiso   1.00
H778   H     0.58218   0.35267   1.00858   0.00000  Uiso   1.00
H779   H     0.55887   0.38574   0.94366   0.00000  Uiso   1.00
H780   H     0.61418   0.46484   0.92285   0.00000  Uiso   1.00
H781   H     0.36460   0.89306   0.79701   0.00000  Uiso   1.00
H782   H     0.36730   0.98505   0.78314   0.00000  Uiso   1.00
H783   H     0.58160   0.36236   0.78897   0.00000  Uiso   1.00
H784   H     0.66820   0.32957   0.80107   0.00000  Uiso   1.00
H785   H     0.49750   0.46350   0.75636   0.00000  Uiso   1.00
H786   H     0.59005   0.46048   0.74341   0.00000  Uiso   1.00
H787   H     0.66533   0.37269   0.70373   0.00000  Uiso   1.00
H788   H     0.74473   0.46199   0.73029   0.00000  Uiso   1.00
H789   H     0.69570   0.49145   0.66784   0.00000  Uiso   1.00
H790   H     0.75830   0.50100   0.63487   0.00000  Uiso   1.00
H791   H     0.78057   0.51779   1.00816   0.00000  Uiso   1.00
H792   H     0.80117   0.42838   0.98474   0.00000  Uiso   1.00
H793   H     0.52283   0.38099   0.57099   0.00000  Uiso   1.00
H794   H     0.61785   0.45688   0.59264   0.00000  Uiso   1.00
H795   H     0.53893   0.61079   0.68209   0.00000  Uiso   1.00
H796   H     0.57276   0.63664   0.64114   0.00000  Uiso   1.00
H797   H     0.42117   0.52451   0.55756   0.00000  Uiso   1.00
H798   H     0.50833   0.49728   0.55035   0.00000  Uiso   1.00
H799   H     0.23823   0.58015   0.55075   0.00000  Uiso   1.00
H800   H     0.32759   0.65856   0.57944   0.00000  Uiso   1.00
H801   H     0.38966   0.72788   0.65133   0.00000  Uiso   1.00
H802   H     0.44443   0.66105   0.63330   0.00000  Uiso   1.00
H803   H     0.38403   0.83555   0.71684   0.00000  Uiso   1.00
H804   H     0.37251   0.73411   0.72343   0.00000  Uiso   1.00
H805   H     0.33094   0.69333   0.77728   0.00000  Uiso   1.00
H806   H     0.43677   0.71830   0.78422   0.00000  Uiso   1.00
H807   H     0.00785   0.64411   0.69305   0.00000  Uiso   1.00
H808   H     0.11107   0.67665   0.71060   0.00000  Uiso   1.00
loop_
_atom_site_aniso_label
_atom_site_aniso_U_11
_atom_site_aniso_U_22
_atom_site_aniso_U_33
_atom_site_aniso_U_12
_atom_site_aniso_U_13
_atom_site_aniso_U_23
C1        0.06408   0.06209   0.08077   0.02874   0.04826   0.03707
C3        0.04922   0.05940   0.07440   0.02158   0.02883   0.02795
O5        0.05193   0.06946   0.07971   0.02951   0.01940   0.03216
C7        0.05605   0.05079   0.05739   0.03190   0.03325   0.02859
O9        0.05293   0.06101   0.05420   0.03208   0.01892   0.02441
C11       0.06395   0.06198   0.05739   0.03148   0.03812   0.03210
O13       0.05837   0.04734   0.04889   0.02337   0.02209   0.02627
C14       0.09594   0.08452   0.05845   0.06075   0.04745   0.04114
O16       0.08803   0.09587   0.07546   0.05348   0.05829   0.05529
C17       0.14019   0.12235   0.05101   0.07882   0.04571   0.03460
O20       0.26728   0.20984   0.10947   0.14261   0.06352   0.05186
C22       0.05322   0.04813   0.05208   0.02415   0.01534   0.02459
C24       0.05668   0.04951   0.03932   0.03225   0.01066   0.01762
O26       0.05699   0.04979   0.04676   0.02540   0.01736   0.01440
C28       0.06441   0.05114   0.03826   0.02897   0.02035   0.01973
O30       0.04949   0.07280   0.04358   0.01717   0.01843   0.01666
C32       0.05972   0.04861   0.04570   0.02468   0.01744   0.02419
O34       0.06117   0.05373   0.04358   0.02659   0.01177   0.02476
C35       0.05937   0.05391   0.04145   0.02081   0.01213   0.01783
O37       0.06008   0.05833   0.04251   0.02343   0.01302   0.02355
C38       0.07335   0.06517   0.04358   0.01478   0.01762   0.02073
O41       0.06589   0.08258   0.05314   0.02516   0.00639   0.03655
C43       0.05782   0.05433   0.04358   0.02528   0.00266   0.01715
C45       0.04295   0.05351   0.05101   0.01979   0.00646   0.01840
O47       0.05321   0.06502   0.05101   0.02069   0.01987   0.01198
C49       0.04118   0.06500   0.04251   0.02128   0.01453   0.02866
O51       0.04964   0.06167   0.04358   0.01365   0.01464   0.01540
C53       0.05147   0.05024   0.05420   0.02653   0.00904   0.02576
O55       0.05088   0.06096   0.05101   0.03178   0.01685   0.02969
C56       0.08829   0.06419   0.04039   0.03297   0.02227   0.02280
O58       0.09308   0.04802   0.04995   0.02194   0.00528   0.02941
C59       0.15152   0.07853   0.05314   0.03165   0.01859   0.03623
O62       0.19904   0.08185   0.07652   0.03708  -0.03331   0.01749
C64       0.07824   0.05849   0.04464   0.04734   0.01088   0.01905
C66       0.07050   0.05686   0.06696   0.03488   0.02865   0.03141
O68       0.07301   0.05358   0.07652   0.03798   0.03959   0.03231
C70       0.07473   0.05520   0.04358   0.03893   0.01766   0.02562
O72       0.09204   0.05269   0.05527   0.04102   0.02924   0.02591
C74       0.07113   0.06309   0.04995   0.04054   0.01342   0.02151
O76       0.08605   0.05832   0.04251   0.04889   0.01021   0.01476
C77       0.09080   0.08345   0.04995   0.05199   0.02297   0.03198
O79       0.09026   0.06604   0.04889   0.05205   0.01342   0.02151
C85       0.08326   0.05758   0.04570   0.04931   0.02009   0.01340
C87       0.08403   0.06206   0.04358   0.05056   0.01888   0.01951
O89       0.09172   0.08431   0.04464   0.06290   0.02776   0.02570
C91       0.07661   0.06072   0.03401   0.04698   0.01298   0.01865
O93       0.06698   0.07797   0.03932   0.04406   0.02503   0.02670
C95       0.07854   0.05127   0.03614   0.03518   0.01799   0.01380
O97       0.08320   0.04250   0.03614   0.02432   0.00977   0.01190
C98       0.07069   0.04952   0.03614   0.02546   0.01478   0.00704
O100      0.08405   0.06020   0.03826   0.04102   0.01102   0.01069
C101      0.08333   0.07267   0.03614   0.02706   0.01906   0.01605
O104      0.07988   0.07695   0.03932   0.04621   0.02241   0.01444
C106      0.08454   0.05315   0.04676   0.01687   0.03693   0.01516
C108      0.06869   0.05140   0.03826   0.02546   0.02241   0.01444
O110      0.06172   0.05425   0.04039   0.02212   0.01722   0.02276
C112      0.07073   0.05144   0.03082   0.01788   0.01549   0.01623
O114      0.06789   0.06568   0.03826   0.02241   0.01597   0.02398
C116      0.07945   0.05400   0.03614   0.01627   0.01335   0.01172
O118      0.05731   0.05573   0.04995   0.01431   0.00944   0.02373
C119      0.10544   0.08218   0.04251  -0.00168   0.00510   0.03287
O121      0.10217   0.08098   0.03507   0.00184   0.02635   0.00733
C122      0.09310   0.09124   0.09459  -0.00299   0.01903   0.03909
O125      0.20528   0.18164   0.11585   0.07440   0.07646   0.06562
C127      0.06368   0.05796   0.04889   0.02713   0.03089   0.02266
C129      0.04496   0.06479   0.04783   0.02874   0.02249   0.02423
O131      0.05514   0.06309   0.04889   0.02993   0.01619   0.02541
C133      0.04407   0.05268   0.04145   0.01705   0.01843   0.01666
O135      0.06351   0.05592   0.04251   0.02170   0.02352   0.02159
C137      0.05241   0.05676   0.05420   0.02534   0.02857   0.02162
O139      0.05354   0.06910   0.06271   0.03154   0.03543   0.03799
C140      0.07589   0.05816   0.04995   0.02241   0.01958   0.02870
O142      0.09649   0.05498   0.04464   0.01931   0.02813   0.01877
C143      0.15159   0.06356   0.05101   0.01967   0.00601   0.01554
O146      0.18826   0.07360   0.08396   0.01114   0.07914   0.03179
O192      0.13031   0.08865   0.27633  -0.04855   0.13654  -0.02550
O196      0.09051   0.12638   0.10203   0.03392   0.03985   0.03863
C202      0.06608   0.06021   0.08077   0.02874   0.03824   0.04678
C204      0.06321   0.04626   0.07440   0.02158   0.02883   0.02795
O206      0.07392   0.04880   0.07971   0.02951   0.03318   0.01880
C208      0.05405   0.05267   0.05739   0.03190   0.02950   0.03224
O210      0.06492   0.04974   0.05420   0.03208   0.02518   0.01834
C212      0.06595   0.06010   0.05739   0.03148   0.03311   0.03695
O214      0.05038   0.05485   0.04889   0.02337   0.02710   0.02141
C215      0.08994   0.09015   0.05845   0.06075   0.04244   0.04600
O217      0.10203   0.08273   0.07546   0.05348   0.05704   0.05650
C218      0.13020   0.13174   0.05101   0.07882   0.03569   0.04431
O221      0.22330   0.25117   0.10947   0.14261   0.05350   0.06158
C223      0.05122   0.05001   0.05208   0.02415   0.02536   0.01487
C225      0.05268   0.05326   0.03932   0.03225   0.01817   0.01033
O227      0.05299   0.05355   0.04676   0.02540   0.01486   0.01683
C229      0.05442   0.06053   0.03826   0.02897   0.02035   0.01973
O231      0.07747   0.04650   0.04358   0.01717   0.01718   0.01787
C233      0.05173   0.05612   0.04570   0.02468   0.02496   0.01691
O235      0.05717   0.05748   0.04358   0.02659   0.02554   0.01141
C236      0.05737   0.05579   0.04145   0.02081   0.01840   0.01176
O238      0.06208   0.05646   0.04251   0.02343   0.02429   0.01262
C239      0.06935   0.06893   0.04358   0.01478   0.02138   0.01708
O242      0.08788   0.06192   0.05314   0.02516   0.03771   0.00619
C244      0.05782   0.05433   0.04358   0.02528   0.01769   0.00258
C246      0.05694   0.04036   0.05101   0.01979   0.01898   0.00626
O248      0.06920   0.05000   0.05101   0.02069   0.01235   0.01926
C250      0.06917   0.03870   0.04251   0.02128   0.02956   0.01409
O252      0.06563   0.04665   0.04358   0.01365   0.01589   0.01419
C254      0.05347   0.04836   0.05420   0.02653   0.02658   0.00876
O256      0.06487   0.04782   0.05101   0.03178   0.03063   0.01634
C257      0.06831   0.08297   0.04039   0.03297   0.02352   0.02159
O259      0.05110   0.08747   0.04995   0.02194   0.03033   0.00512
C260      0.08356   0.14239   0.05314   0.03165   0.03738   0.01802
O263      0.08710   0.18704   0.07652   0.03708   0.01805  -0.03229
C265      0.06225   0.07352   0.04464   0.04734   0.01965   0.01055
C267      0.06051   0.06625   0.06696   0.03488   0.03241   0.02777
O269      0.05702   0.06861   0.07652   0.03798   0.03333   0.03838
C271      0.05874   0.07023   0.04358   0.03893   0.02643   0.01712
O273      0.05607   0.08650   0.05527   0.04102   0.02673   0.02834
C275      0.06714   0.06684   0.04995   0.04054   0.02219   0.01301
O277      0.06206   0.08086   0.04251   0.04889   0.01522   0.00990
C278      0.08880   0.08533   0.04995   0.05199   0.03299   0.02227
O280      0.07027   0.08482   0.04889   0.05205   0.02219   0.01301
C286      0.06128   0.07824   0.04570   0.04931   0.01383   0.01948
C288      0.06604   0.07897   0.04358   0.05056   0.02013   0.01830
O290      0.08972   0.08619   0.04464   0.06290   0.02651   0.02691
C292      0.06461   0.07199   0.03401   0.04698   0.01924   0.01258
O294      0.08297   0.06294   0.03932   0.04406   0.02754   0.02427
C296      0.05456   0.07381   0.03614   0.03518   0.01423   0.01744
O298      0.04523   0.07819   0.03614   0.02432   0.01228   0.00947
C299      0.05270   0.06643   0.03614   0.02546   0.00727   0.01433
O301      0.06406   0.07898   0.03826   0.04102   0.01102   0.01069
C302      0.07733   0.07830   0.03614   0.02706   0.01655   0.01848
O305      0.08188   0.07507   0.03932   0.04621   0.01490   0.02173
C307      0.05656   0.07945   0.04676   0.01687   0.01564   0.03580
C309      0.05470   0.06455   0.03826   0.02546   0.01490   0.02173
O311      0.05773   0.05800   0.04039   0.02212   0.02348   0.01669
C313      0.05474   0.06647   0.03082   0.01788   0.01674   0.01501
O315      0.06989   0.06380   0.03826   0.02241   0.02474   0.01548
C317      0.05747   0.07466   0.03614   0.01627   0.01209   0.01294
O319      0.05931   0.05386   0.04995   0.01431   0.02448   0.00915
C320      0.08745   0.09909   0.04251  -0.00168   0.03391   0.00494
O322      0.08618   0.09601   0.03507   0.00184   0.00756   0.02555
C323      0.09709   0.08748   0.09459  -0.00299   0.04033   0.01845
O326      0.19329   0.19291   0.11585   0.07440   0.06769   0.07412
C328      0.06168   0.05984   0.04889   0.02713   0.02338   0.02995
C330      0.06895   0.04225   0.04783   0.02874   0.02500   0.02180
O332      0.06714   0.05182   0.04889   0.02993   0.02621   0.01569
C334      0.05606   0.04141   0.04145   0.01705   0.01718   0.01787
O336      0.05951   0.05968   0.04251   0.02170   0.02227   0.02280
C338      0.06040   0.04925   0.05420   0.02534   0.02231   0.02770
O340      0.07353   0.05032   0.06271   0.03154   0.03919   0.03435
C341      0.06189   0.07131   0.04995   0.02241   0.02960   0.01898
O343      0.05851   0.09067   0.04464   0.01931   0.01936   0.02727
C344      0.06763   0.14245   0.05101   0.01967   0.01603   0.00583
O347      0.07832   0.17691   0.08396   0.01114   0.03279   0.07672
O349      0.09433   0.12246   0.27633  -0.04855  -0.02630   0.13236
O353      0.13449   0.08506   0.10203   0.03392   0.03985   0.03863
O359      0.09042   0.08497   0.11372   0.03827   0.01950   0.01891
C405      0.06408   0.06209   0.08077   0.02874   0.04826   0.03707
C407      0.04922   0.05940   0.07440   0.02158   0.02883   0.02795
O409      0.05193   0.06946   0.07971   0.02951   0.01940   0.03216
C411      0.05605   0.05079   0.05739   0.03190   0.03325   0.02859
O413      0.05293   0.06101   0.05420   0.03208   0.01892   0.02441
C415      0.06395   0.06198   0.05739   0.03148   0.03812   0.03210
O417      0.05837   0.04734   0.04889   0.02337   0.02209   0.02627
C418      0.09594   0.08452   0.05845   0.06075   0.04745   0.04114
O420      0.08803   0.09587   0.07546   0.05348   0.05829   0.05529
C421      0.14019   0.12235   0.05101   0.07882   0.04571   0.03460
O424      0.26728   0.20984   0.10947   0.14261   0.06352   0.05186
C426      0.05322   0.04813   0.05208   0.02415   0.01534   0.02459
C428      0.05668   0.04951   0.03932   0.03225   0.01066   0.01762
O430      0.05699   0.04979   0.04676   0.02540   0.01736   0.01440
C432      0.06441   0.05114   0.03826   0.02897   0.02035   0.01973
O434      0.04949   0.07280   0.04358   0.01717   0.01843   0.01666
C436      0.05972   0.04861   0.04570   0.02468   0.01744   0.02419
O438      0.06117   0.05373   0.04358   0.02659   0.01177   0.02476
C439      0.05937   0.05391   0.04145   0.02081   0.01213   0.01783
O441      0.06008   0.05833   0.04251   0.02343   0.01302   0.02355
C442      0.07335   0.06517   0.04358   0.01478   0.01762   0.02073
O445      0.06589   0.08258   0.05314   0.02516   0.00639   0.03655
C447      0.05782   0.05433   0.04358   0.02528   0.00266   0.01715
C449      0.04295   0.05351   0.05101   0.01979   0.00646   0.01840
O451      0.05321   0.06502   0.05101   0.02069   0.01987   0.01198
C453      0.04118   0.06500   0.04251   0.02128   0.01453   0.02866
O455      0.04964   0.06167   0.04358   0.01365   0.01464   0.01540
C457      0.05147   0.05024   0.05420   0.02653   0.00904   0.02576
O459      0.05088   0.06096   0.05101   0.03178   0.01685   0.02969
C460      0.08829   0.06419   0.04039   0.03297   0.02227   0.02280
O462      0.09308   0.04802   0.04995   0.02194   0.00528   0.02941
C463      0.15152   0.07853   0.05314   0.03165   0.01859   0.03623
O466      0.19904   0.08185   0.07652   0.03708  -0.03331   0.01749
C468      0.07824   0.05849   0.04464   0.04734   0.01088   0.01905
C470      0.07050   0.05686   0.06696   0.03488   0.02865   0.03141
O472      0.07301   0.05358   0.07652   0.03798   0.03959   0.03231
C474      0.07473   0.05520   0.04358   0.03893   0.01766   0.02562
O476      0.09204   0.05269   0.05527   0.04102   0.02924   0.02591
C478      0.07113   0.06309   0.04995   0.04054   0.01342   0.02151
O480      0.08605   0.05832   0.04251   0.04889   0.01021   0.01476
C481      0.09080   0.08345   0.04995   0.05199   0.02297   0.03198
O483      0.09026   0.06604   0.04889   0.05205   0.01342   0.02151
C489      0.08326   0.05758   0.04570   0.04931   0.02009   0.01340
C491      0.08403   0.06206   0.04358   0.05056   0.01888   0.01951
O493      0.09172   0.08431   0.04464   0.06290   0.02776   0.02570
C495      0.07661   0.06072   0.03401   0.04698   0.01298   0.01865
O497      0.06698   0.07797   0.03932   0.04406   0.02503   0.02670
C499      0.07854   0.05127   0.03614   0.03518   0.01799   0.01380
O501      0.08320   0.04250   0.03614   0.02432   0.00977   0.01190
C502      0.07069   0.04952   0.03614   0.02546   0.01478   0.00704
O504      0.08405   0.06020   0.03826   0.04102   0.01102   0.01069
C505      0.08333   0.07267   0.03614   0.02706   0.01906   0.01605
O508      0.07988   0.07695   0.03932   0.04621   0.02241   0.01444
C510      0.08454   0.05315   0.04676   0.01687   0.03693   0.01516
C512      0.06869   0.05140   0.03826   0.02546   0.02241   0.01444
O514      0.06172   0.05425   0.04039   0.02212   0.01722   0.02276
C516      0.07073   0.05144   0.03082   0.01788   0.01549   0.01623
O518      0.06789   0.06568   0.03826   0.02241   0.01597   0.02398
C520      0.07945   0.05400   0.03614   0.01627   0.01335   0.01172
O522      0.05731   0.05573   0.04995   0.01431   0.00944   0.02373
C523      0.10544   0.08218   0.04251  -0.00168   0.00510   0.03287
O525      0.10217   0.08098   0.03507   0.00184   0.02635   0.00733
C526      0.09310   0.09124   0.09459  -0.00299   0.01903   0.03909
O529      0.20528   0.18164   0.11585   0.07440   0.07646   0.06562
C531      0.06368   0.05796   0.04889   0.02713   0.03089   0.02266
C533      0.04496   0.06479   0.04783   0.02874   0.02249   0.02423
O535      0.05514   0.06309   0.04889   0.02993   0.01619   0.02541
C537      0.04407   0.05268   0.04145   0.01705   0.01843   0.01666
O539      0.06351   0.05592   0.04251   0.02170   0.02352   0.02159
C541      0.05241   0.05676   0.05420   0.02534   0.02857   0.02162
O543      0.05354   0.06910   0.06271   0.03154   0.03543   0.03799
C544      0.07589   0.05816   0.04995   0.02241   0.01958   0.02870
O546      0.09649   0.05498   0.04464   0.01931   0.02813   0.01877
C547      0.15159   0.06356   0.05101   0.01967   0.00601   0.01554
O550      0.18826   0.07360   0.08396   0.01114   0.07914   0.03179
O596      0.13031   0.08865   0.27633  -0.04855   0.13654  -0.02550
O600      0.09051   0.12638   0.10203   0.03392   0.03985   0.03863
C606      0.06608   0.06021   0.08077   0.02874   0.03824   0.04678
C608      0.06321   0.04626   0.07440   0.02158   0.02883   0.02795
O610      0.07392   0.04880   0.07971   0.02951   0.03318   0.01880
C612      0.05405   0.05267   0.05739   0.03190   0.02950   0.03224
O614      0.06492   0.04974   0.05420   0.03208   0.02518   0.01834
C616      0.06595   0.06010   0.05739   0.03148   0.03311   0.03695
O618      0.05038   0.05485   0.04889   0.02337   0.02710   0.02141
C619      0.08994   0.09015   0.05845   0.06075   0.04244   0.04600
O621      0.10203   0.08273   0.07546   0.05348   0.05704   0.05650
C622      0.13020   0.13174   0.05101   0.07882   0.03569   0.04431
O625      0.22330   0.25117   0.10947   0.14261   0.05350   0.06158
C627      0.05122   0.05001   0.05208   0.02415   0.02536   0.01487
C629      0.05268   0.05326   0.03932   0.03225   0.01817   0.01033
O631      0.05299   0.05355   0.04676   0.02540   0.01486   0.01683
C633      0.05442   0.06053   0.03826   0.02897   0.02035   0.01973
O635      0.07747   0.04650   0.04358   0.01717   0.01718   0.01787
C637      0.05173   0.05612   0.04570   0.02468   0.02496   0.01691
O639      0.05717   0.05748   0.04358   0.02659   0.02554   0.01141
C640      0.05737   0.05579   0.04145   0.02081   0.01840   0.01176
O642      0.06208   0.05646   0.04251   0.02343   0.02429   0.01262
C643      0.06935   0.06893   0.04358   0.01478   0.02138   0.01708
O646      0.08788   0.06192   0.05314   0.02516   0.03771   0.00619
C648      0.05782   0.05433   0.04358   0.02528   0.01769   0.00258
C650      0.05694   0.04036   0.05101   0.01979   0.01898   0.00626
O652      0.06920   0.05000   0.05101   0.02069   0.01235   0.01926
C654      0.06917   0.03870   0.04251   0.02128   0.02956   0.01409
O656      0.06563   0.04665   0.04358   0.01365   0.01589   0.01419
C658      0.05347   0.04836   0.05420   0.02653   0.02658   0.00876
O660      0.06487   0.04782   0.05101   0.03178   0.03063   0.01634
C661      0.06831   0.08297   0.04039   0.03297   0.02352   0.02159
O663      0.05110   0.08747   0.04995   0.02194   0.03033   0.00512
C664      0.08356   0.14239   0.05314   0.03165   0.03738   0.01802
O667      0.08710   0.18704   0.07652   0.03708   0.01805  -0.03229
C669      0.06225   0.07352   0.04464   0.04734   0.01965   0.01055
C671      0.06051   0.06625   0.06696   0.03488   0.03241   0.02777
O673      0.05702   0.06861   0.07652   0.03798   0.03333   0.03838
C675      0.05874   0.07023   0.04358   0.03893   0.02643   0.01712
O677      0.05607   0.08650   0.05527   0.04102   0.02673   0.02834
C679      0.06714   0.06684   0.04995   0.04054   0.02219   0.01301
O681      0.06206   0.08086   0.04251   0.04889   0.01522   0.00990
C682      0.08880   0.08533   0.04995   0.05199   0.03299   0.02227
O684      0.07027   0.08482   0.04889   0.05205   0.02219   0.01301
C690      0.06128   0.07824   0.04570   0.04931   0.01383   0.01948
C692      0.06604   0.07897   0.04358   0.05056   0.02013   0.01830
O694      0.08972   0.08619   0.04464   0.06290   0.02651   0.02691
C696      0.06461   0.07199   0.03401   0.04698   0.01924   0.01258
O698      0.08297   0.06294   0.03932   0.04406   0.02754   0.02427
C700      0.05456   0.07381   0.03614   0.03518   0.01423   0.01744
O702      0.04523   0.07819   0.03614   0.02432   0.01228   0.00947
C703      0.05270   0.06643   0.03614   0.02546   0.00727   0.01433
O705      0.06406   0.07898   0.03826   0.04102   0.01102   0.01069
C706      0.07733   0.07830   0.03614   0.02706   0.01655   0.01848
O709      0.08188   0.07507   0.03932   0.04621   0.01490   0.02173
C711      0.05656   0.07945   0.04676   0.01687   0.01564   0.03580
C713      0.05470   0.06455   0.03826   0.02546   0.01490   0.02173
O715      0.05773   0.05800   0.04039   0.02212   0.02348   0.01669
C717      0.05474   0.06647   0.03082   0.01788   0.01674   0.01501
O719      0.06989   0.06380   0.03826   0.02241   0.02474   0.01548
C721      0.05747   0.07466   0.03614   0.01627   0.01209   0.01294
O723      0.05931   0.05386   0.04995   0.01431   0.02448   0.00915
C724      0.08745   0.09909   0.04251  -0.00168   0.03391   0.00494
O726      0.08618   0.09601   0.03507   0.00184   0.00756   0.02555
C727      0.09709   0.08748   0.09459  -0.00299   0.04033   0.01845
O730      0.19329   0.19291   0.11585   0.07440   0.06769   0.07412
C732      0.06168   0.05984   0.04889   0.02713   0.02338   0.02995
C734      0.06895   0.04225   0.04783   0.02874   0.02500   0.02180
O736      0.06714   0.05182   0.04889   0.02993   0.02621   0.01569
C738      0.05606   0.04141   0.04145   0.01705   0.01718   0.01787
O740      0.05951   0.05968   0.04251   0.02170   0.02227   0.02280
C742      0.06040   0.04925   0.05420   0.02534   0.02231   0.02770
O744      0.07353   0.05032   0.06271   0.03154   0.03919   0.03435
C745      0.06189   0.07131   0.04995   0.02241   0.02960   0.01898
O747      0.05851   0.09067   0.04464   0.01931   0.01936   0.02727
C748      0.06763   0.14245   0.05101   0.01967   0.01603   0.00583
O751      0.07832   0.17691   0.08396   0.01114   0.03279   0.07672
O753      0.09433   0.12246   0.27633  -0.04855  -0.02630   0.13236
O757      0.13449   0.08506   0.10203   0.03392   0.03985   0.03863
O763      0.09042   0.08497   0.11372   0.03827   0.01950   0.01891
loop_
_geom_bond_atom_site_label_1
_geom_bond_atom_site_label_2
_geom_bond_distance
_geom_bond_site_symmetry_2
_ccdc_geom_bond_type
C1     O16     1.437   .     S
C1     O139    1.406   .     S
C1     C3      1.533   .     S
C1     H2      1.098   .     S
C3     O5      1.408   .     S
C3     C7      1.523   .     S
C3     H4      1.103   .     S
O5     H6      0.989   .     S
C7     O9      1.435   .     S
C7     C11     1.526   .     S
C7     H8      1.102   .     S
O9     H10     0.991   .     S
C11    O13     1.432   .     S
C11    C14     1.539   .     S
C11    H12     1.105   .     S
O13    C22     1.413   .     S
C14    O16     1.448   .     S
C14    C17     1.521   .     S
C14    H15     1.101   .     S
C17    O20     1.433   .     S
C17    H18     1.097   .     S
C17    H19     1.104   .     S
O20    H21     0.973   .     S
C22    O37     1.418   .     S
C22    C24     1.527   .     S
C22    H23     1.100   .     S
C24    O26     1.431   .     S
C24    C28     1.521   .     S
C24    H25     1.099   .     S
O26    H27     0.984   .     S
C28    O30     1.431   .     S
C28    C32     1.531   .     S
C28    H29     1.105   .     S
O30    H31     1.002   .     S
C32    O34     1.429   .     S
C32    C35     1.543   .     S
C32    H33     1.104   .     S
O34    C43     1.425   .     S
C35    O37     1.445   .     S
C35    C38     1.526   .     S
C35    H36     1.107   .     S
C38    O41     1.426   .     S
C38    H40     1.101   .     S
C38    H39     1.103   .     S
O41    H42     0.988   .     S
C43    O58     1.408   .     S
C43    C45     1.530   .     S
C43    H44     1.100   .     S
C45    O47     1.423   .     S
C45    C49     1.533   .     S
C45    H46     1.103   .     S
O47    H48     1.000   .     S
C49    O51     1.408   .     S
C49    C53     1.531   .     S
C49    H50     1.109   .     S
O51    H52     0.990   .     S
C53    O55     1.450   .     S
C53    C56     1.550   .     S
C53    H54     1.105   .     S
O55    C64     1.388   .     S
C56    O58     1.439   .     S
C56    C59     1.530   .     S
C56    H57     1.108   .     S
C59    O62     1.424   .     S
C59    H60     1.099   .     S
C59    H61     1.100   .     S
O62    H63     0.993   .     S
C64    O79     1.450   .     S
C64    C66     1.548   .     S
C64    H65     1.101   .     S
C66    O68     1.410   .     S
C66    C70     1.525   .     S
C66    H67     1.111   .     S
O68    H69     0.981   .     S
C70    O72     1.433   .     S
C70    C74     1.538   .     S
C70    H71     1.102   .     S
O72    H73     0.993   .     S
C74    O76     1.427   .     S
C74    C77     1.541   .     S
C74    H75     1.105   .     S
O76    C85     1.434   .     S
C77    O79     1.454   .     S
C77    C80     1.518   .     S
C77    H78     1.104   .     S
C80    O83     1.437   .     S
C80    H82     1.098   .     S
C80    H81     1.101   .     S
O83    H84     0.974   .     S
C85    O100    1.406   .     S
C85    C87     1.530   .     S
C85    H86     1.099   .     S
C87    O89     1.426   .     S
C87    C91     1.526   .     S
C87    H88     1.100   .     S
O89    H90     0.984   .     S
C91    O93     1.414   .     S
C91    C95     1.531   .     S
C91    H92     1.105   .     S
O93    H94     0.982   .     S
C95    O97     1.446   .     S
C95    C98     1.535   .     S
C95    H96     1.103   .     S
O97    C106    1.406   .     S
C98    O100    1.440   .     S
C98    C101    1.520   .     S
C98    H99     1.107   .     S
C101   O104    1.444   .     S
C101   H102    1.102   .     S
C101   H103    1.100   .     S
O104   H105    1.003   .     S
C106   O121    1.421   .     S
C106   C108    1.544   .     S
C106   H107    1.099   .     S
C108   O110    1.415   .     S
C108   C112    1.524   .     S
C108   H109    1.109   .     S
O110   H111    0.990   .     S
C112   O114    1.440   .     S
C112   C116    1.519   .     S
C112   H113    1.102   .     S
O114   H115    1.007   .     S
C116   O118    1.428   .     S
C116   C119    1.531   .     S
C116   H117    1.104   .     S
O118   C127    1.419   .     S
C119   O121    1.446   .     S
C119   C122    1.523   .     S
C119   H120    1.106   .     S
C122   O125    1.435   .     S
C122   H123    1.099   .     S
C122   H124    1.098   .     S
O125   H126    1.014   .     S
C127   O142    1.411   .     S
C127   C129    1.522   .     S
C127   H128    1.099   .     S
C129   O131    1.429   .     S
C129   C133    1.529   .     S
C129   H130    1.101   .     S
O131   H132    0.989   .     S
C133   O135    1.423   .     S
C133   C137    1.530   .     S
C133   H134    1.105   .     S
O135   H136    0.984   .     S
C137   O139    1.440   .     S
C137   C140    1.543   .     S
C137   H138    1.104   .     S
C140   O142    1.443   .     S
C140   C143    1.528   .     S
C140   H141    1.103   .     S
C143   O146    1.418   .     S
C143   H145    1.101   .     S
C143   H144    1.101   .     S
O146   H147    1.024   .     S
O148   C152    1.374   .     S
O148   H149    0.973   .     S
C150   C152    1.395   .     S
C150   C158    1.402   .     D
C150   H151    1.092   .     S
C152   C153    1.396   .     D
C153   C155    1.391   .     S
C153   H154    1.094   .     S
C155   C157    1.401   .     D
C155   H156    1.089   .     S
C157   C187    1.522   .     S
C157   C158    1.410   .     S
C158   C159    1.513   .     S
C159   C162    1.529   .     S
C159   H161    1.106   .     S
C159   H160    1.100   .     S
C162   C165    1.530   .     S
C162   H163    1.105   .     S
C162   H164    1.101   .     S
C165   C167    1.526   .     S
C165   C187    1.546   .     S
C165   H166    1.107   .     S
C167   C169    1.539   .     S
C167   C179    1.550   .     S
C167   H168    1.111   .     S
C169   C172    1.552   .     S
C169   H170    1.098   .     S
C169   H171    1.101   .     S
C172   C175    1.546   .     S
C172   H174    1.099   .     S
C172   H173    1.100   .     S
C175   O177    1.429   .     S
C175   C179    1.552   .     S
C175   H176    1.107   .     S
O177   H178    0.977   .     S
C179   C184    1.532   .     S
C179   C180    1.539   .     S
C180   H183    1.097   .     S
C180   H182    1.098   .     S
C180   H181    1.099   .     S
C184   C189    1.534   .     S
C184   H186    1.103   .     S
C184   H185    1.104   .     S
C187   C189    1.539   .     S
C187   H188    1.112   .     S
C189   H190    1.103   .     S
C189   H191    1.098   .     S
O192   H371    0.978   .     S
O192   H372    1.016   .     S
O193   H375    0.998   .     S
O193   H376    0.995   .     S
O194   H367    0.980   .     S
O194   H368    0.988   .     S
O195   H363    0.986   .     S
O195   H364    0.989   .     S
O196   H369    0.996   .     S
O196   H370    0.998   .     S
O197   H379    0.992   .     S
O197   H380    0.982   .     S
O198   H373    0.996   .     S
O198   H374    0.986   .     S
O199   H361    0.995   .     S
O199   H362    0.991   .     S
O200   H365    0.975   .     S
O200   H366    1.000   .     S
O201   H377    0.972   .     S
O201   H378    1.017   .     S
C202   O217    1.422   .     S
C202   O340    1.409   .     S
C202   C204    1.532   .     S
C202   H203    1.100   .     S
C204   O206    1.422   .     S
C204   C208    1.520   .     S
C204   H205    1.104   .     S
O206   H207    0.989   .     S
C208   O210    1.438   .     S
C208   C212    1.539   .     S
C208   H209    1.105   .     S
O210   H211    1.022   .     S
C212   O214    1.428   .     S
C212   C215    1.530   .     S
C212   H213    1.105   .     S
O214   C223    1.418   .     S
C215   O217    1.450   .     S
C215   C218    1.516   .     S
C215   H216    1.103   .     S
C218   O221    1.425   .     S
C218   H219    1.098   .     S
C218   H220    1.105   .     S
O221   H222    0.978   .     S
C223   O238    1.410   .     S
C223   C225    1.531   .     S
C223   H224    1.101   .     S
C225   O227    1.425   .     S
C225   C229    1.525   .     S
C225   H226    1.100   .     S
O227   H228    1.005   .     S
C229   O231    1.423   .     S
C229   C233    1.529   .     S
C229   H230    1.107   .     S
O231   H232    0.990   .     S
C233   O235    1.439   .     S
C233   C236    1.540   .     S
C233   H234    1.104   .     S
O235   C244    1.415   .     S
C236   O238    1.442   .     S
C236   C239    1.526   .     S
C236   H237    1.106   .     S
C239   O242    1.427   .     S
C239   H241    1.100   .     S
C239   H240    1.102   .     S
O242   H243    0.998   .     S
C244   O259    1.413   .     S
C244   C246    1.540   .     S
C244   H245    1.100   .     S
C246   O248    1.407   .     S
C246   C250    1.537   .     S
C246   H247    1.112   .     S
O248   H249    1.018   .     S
C250   O252    1.424   .     S
C250   C254    1.530   .     S
C250   H251    1.103   .     S
O252   H253    0.991   .     S
C254   O256    1.428   .     S
C254   C257    1.542   .     S
C254   H255    1.104   .     S
O256   C265    1.422   .     S
C257   O259    1.442   .     S
C257   C260    1.528   .     S
C257   H258    1.107   .     S
C260   O263    1.428   .     S
C260   H261    1.100   .     S
C260   H262    1.100   .     S
O263   H264    0.997   .     S
C265   O280    1.411   .     S
C265   C267    1.531   .     S
C265   H266    1.100   .     S
C267   O269    1.424   .     S
C267   C271    1.532   .     S
C267   H268    1.102   .     S
O269   H270    0.992   .     S
C271   O273    1.432   .     S
C271   C275    1.530   .     S
C271   H272    1.104   .     S
O273   H274    0.996   .     S
C275   O277    1.434   .     S
C275   C278    1.541   .     S
C275   H276    1.103   .     S
O277   C286    1.431   .     S
C278   O280    1.444   .     S
C278   C281    1.525   .     S
C278   H279    1.106   .     S
C281   O284    1.425   .     S
C281   H283    1.098   .     S
C281   H282    1.102   .     S
O284   H285    0.983   .     S
C286   O301    1.400   .     S
C286   C288    1.530   .     S
C286   H287    1.101   .     S
C288   O290    1.422   .     S
C288   C292    1.527   .     S
C288   H289    1.102   .     S
O290   H291    0.990   .     S
C292   O294    1.425   .     S
C292   C296    1.528   .     S
C292   H293    1.103   .     S
O294   H295    0.988   .     S
C296   O298    1.442   .     S
C296   C299    1.539   .     S
C296   H297    1.102   .     S
O298   C307    1.409   .     S
C299   O301    1.443   .     S
C299   C302    1.518   .     S
C299   H300    1.106   .     S
C302   O305    1.427   .     S
C302   H303    1.101   .     S
C302   H304    1.099   .     S
O305   H306    0.990   .     S
C307   O322    1.416   .     S
C307   C309    1.540   .     S
C307   H308    1.101   .     S
C309   O311    1.423   .     S
C309   C313    1.528   .     S
C309   H310    1.106   .     S
O311   H312    0.990   .     S
C313   O315    1.434   .     S
C313   C317    1.524   .     S
C313   H314    1.103   .     S
O315   H316    1.014   .     S
C317   O319    1.432   .     S
C317   C320    1.531   .     S
C317   H318    1.103   .     S
O319   C328    1.415   .     S
C320   O322    1.443   .     S
C320   C323    1.526   .     S
C320   H321    1.105   .     S
C323   O326    1.425   .     S
C323   H324    1.102   .     S
C323   H325    1.098   .     S
O326   H327    0.999   .     S
C328   O343    1.428   .     S
C328   C330    1.535   .     S
C328   H329    1.100   .     S
C330   O332    1.420   .     S
C330   C334    1.535   .     S
C330   H331    1.100   .     S
O332   H333    0.987   .     S
C334   O336    1.413   .     S
C334   C338    1.536   .     S
C334   H335    1.106   .     S
O336   H337    0.993   .     S
C338   O340    1.428   .     S
C338   C341    1.530   .     S
C338   H339    1.105   .     S
C341   O343    1.446   .     S
C341   C344    1.519   .     S
C341   H342    1.106   .     S
C344   O347    1.426   .     S
C344   H346    1.103   .     S
C344   H345    1.100   .     S
O347   H348    0.983   .     S
O349   H393    0.977   .     S
O349   H394    1.005   .     S
O350   H389    0.999   .     S
O350   H390    0.990   .     S
O351   H391    0.988   .     S
O351   H392    0.981   .     S
O352   H397    0.993   .     S
O352   H398    0.999   .     S
O353   H385    1.017   .     S
O353   H386    0.973   .     S
O354   H383    1.001   .     S
O354   H384    0.990   .     S
O355   H387    0.998   .     S
O355   H388    0.983   .     S
O356   H395    0.986   .     S
O356   H396    1.016   .     S
O357   H399    0.981   .     S
O357   H400    1.005   .     S
O358   H403    0.980   .     S
O358   H404    0.994   .     S
O359   H381    0.982   .     S
O359   H382    0.979   .     S
O360   H401    1.003   .     S
O360   H402    0.993   .     S
C405   O420    1.437   .     S
C405   O543    1.405   .     S
C405   C407    1.533   .     S
C405   H406    1.098   .     S
C407   O409    1.407   .     S
C407   C411    1.523   .     S
C407   H408    1.103   .     S
O409   H410    0.989   .     S
C411   O413    1.434   .     S
C411   C415    1.527   .     S
C411   H412    1.102   .     S
O413   H414    0.990   .     S
C415   O417    1.431   .     S
C415   C418    1.539   .     S
C415   H416    1.105   .     S
O417   C426    1.412   .     S
C418   O420    1.448   .     S
C418   C421    1.520   .     S
C418   H419    1.101   .     S
C421   O424    1.433   .     S
C421   H422    1.097   .     S
C421   H423    1.103   .     S
O424   H425    0.973   .     S
C426   O441    1.418   .     S
C426   C428    1.527   .     S
C426   H427    1.100   .     S
C428   O430    1.431   .     S
C428   C432    1.521   .     S
C428   H429    1.099   .     S
O430   H431    0.984   .     S
C432   O434    1.431   .     S
C432   C436    1.532   .     S
C432   H433    1.105   .     S
O434   H435    1.001   .     S
C436   O438    1.428   .     S
C436   C439    1.543   .     S
C436   H437    1.104   .     S
O438   C447    1.425   .     S
C439   O441    1.445   .     S
C439   C442    1.526   .     S
C439   H440    1.107   .     S
C442   O445    1.426   .     S
C442   H444    1.101   .     S
C442   H443    1.103   .     S
O445   H446    0.988   .     S
C447   O462    1.408   .     S
C447   C449    1.531   .     S
C447   H448    1.100   .     S
C449   O451    1.423   .     S
C449   C453    1.533   .     S
C449   H450    1.103   .     S
O451   H452    1.000   .     S
C453   O455    1.408   .     S
C453   C457    1.531   .     S
C453   H454    1.109   .     S
O455   H456    0.990   .     S
C457   O459    1.450   .     S
C457   C460    1.550   .     S
C457   H458    1.105   .     S
O459   C468    1.388   .     S
C460   O462    1.439   .     S
C460   C463    1.530   .     S
C460   H461    1.108   .     S
C463   O466    1.425   .     S
C463   H464    1.099   .     S
C463   H465    1.100   .     S
O466   H467    0.992   .     S
C468   O483    1.451   .     S
C468   C470    1.548   .     S
C468   H469    1.101   .     S
C470   O472    1.409   .     S
C470   C474    1.525   .     S
C470   H471    1.111   .     S
O472   H473    0.981   .     S
C474   O476    1.433   .     S
C474   C478    1.538   .     S
C474   H475    1.102   .     S
O476   H477    0.994   .     S
C478   O480    1.427   .     S
C478   C481    1.541   .     S
C478   H479    1.105   .     S
O480   C489    1.434   .     S
C481   O483    1.454   .     S
C481   C484    1.519   .     S
C481   H482    1.104   .     S
C484   O487    1.438   .     S
C484   H486    1.098   .     S
C484   H485    1.101   .     S
O487   H488    0.974   .     S
C489   O504    1.406   .     S
C489   C491    1.530   .     S
C489   H490    1.099   .     S
C491   O493    1.426   .     S
C491   C495    1.527   .     S
C491   H492    1.100   .     S
O493   H494    0.985   .     S
C495   O497    1.413   .     S
C495   C499    1.531   .     S
C495   H496    1.105   .     S
O497   H498    0.982   .     S
C499   O501    1.445   .     S
C499   C502    1.534   .     S
C499   H500    1.103   .     S
O501   C510    1.406   .     S
C502   O504    1.440   .     S
C502   C505    1.520   .     S
C502   H503    1.107   .     S
C505   O508    1.444   .     S
C505   H506    1.102   .     S
C505   H507    1.100   .     S
O508   H509    1.003   .     S
C510   O525    1.420   .     S
C510   C512    1.545   .     S
C510   H511    1.099   .     S
C512   O514    1.415   .     S
C512   C516    1.523   .     S
C512   H513    1.109   .     S
O514   H515    0.990   .     S
C516   O518    1.440   .     S
C516   C520    1.519   .     S
C516   H517    1.102   .     S
O518   H519    1.007   .     S
C520   O522    1.427   .     S
C520   C523    1.531   .     S
C520   H521    1.104   .     S
O522   C531    1.418   .     S
C523   O525    1.445   .     S
C523   C526    1.523   .     S
C523   H524    1.106   .     S
C526   O529    1.434   .     S
C526   H527    1.099   .     S
C526   H528    1.098   .     S
O529   H530    1.014   .     S
C531   O546    1.411   .     S
C531   C533    1.522   .     S
C531   H532    1.100   .     S
C533   O535    1.430   .     S
C533   C537    1.530   .     S
C533   H534    1.101   .     S
O535   H536    0.989   .     S
C537   O539    1.423   .     S
C537   C541    1.531   .     S
C537   H538    1.105   .     S
O539   H540    0.984   .     S
C541   O543    1.440   .     S
C541   C544    1.544   .     S
C541   H542    1.104   .     S
C544   O546    1.444   .     S
C544   C547    1.528   .     S
C544   H545    1.104   .     S
C547   O550    1.419   .     S
C547   H549    1.101   .     S
C547   H548    1.101   .     S
O550   H551    1.024   .     S
O552   C556    1.373   .     S
O552   H553    0.974   .     S
C554   C556    1.396   .     S
C554   C562    1.402   .     D
C554   H555    1.092   .     S
C556   C557    1.396   .     D
C557   C559    1.391   .     S
C557   H558    1.094   .     S
C559   C561    1.401   .     D
C559   H560    1.089   .     S
C561   C591    1.524   .     S
C561   C562    1.410   .     S
C562   C563    1.513   .     S
C563   C566    1.530   .     S
C563   H565    1.106   .     S
C563   H564    1.100   .     S
C566   C569    1.530   .     S
C566   H567    1.105   .     S
C566   H568    1.101   .     S
C569   C571    1.528   .     S
C569   C591    1.546   .     S
C569   H570    1.107   .     S
C571   C573    1.539   .     S
C571   C583    1.550   .     S
C571   H572    1.111   .     S
C573   C576    1.553   .     S
C573   H574    1.098   .     S
C573   H575    1.101   .     S
C576   C579    1.546   .     S
C576   H578    1.099   .     S
C576   H577    1.100   .     S
C579   O581    1.429   .     S
C579   C583    1.553   .     S
C579   H580    1.107   .     S
O581   H582    0.977   .     S
C583   C588    1.533   .     S
C583   C584    1.539   .     S
C584   H587    1.097   .     S
C584   H586    1.098   .     S
C584   H585    1.099   .     S
C588   C593    1.535   .     S
C588   H590    1.103   .     S
C588   H589    1.105   .     S
C591   C593    1.540   .     S
C591   H592    1.112   .     S
C593   H594    1.103   .     S
C593   H595    1.098   .     S
O596   H775    0.978   .     S
O596   H776    1.016   .     S
O597   H779    0.998   .     S
O597   H780    0.995   .     S
O598   H771    0.980   .     S
O598   H772    0.988   .     S
O599   H767    0.986   .     S
O599   H768    0.988   .     S
O600   H773    0.997   .     S
O600   H774    0.998   .     S
O601   H783    0.993   .     S
O601   H784    0.981   .     S
O602   H777    0.996   .     S
O602   H778    0.986   .     S
O603   H765    0.995   .     S
O603   H766    0.991   .     S
O604   H769    0.976   .     S
O604   H770    0.999   .     S
O605   H781    0.972   .     S
O605   H782    1.016   .     S
C606   O621    1.422   .     S
C606   O744    1.410   .     S
C606   C608    1.531   .     S
C606   H607    1.100   .     S
C608   O610    1.422   .     S
C608   C612    1.520   .     S
C608   H609    1.104   .     S
O610   H611    0.989   .     S
C612   O614    1.438   .     S
C612   C616    1.539   .     S
C612   H613    1.105   .     S
O614   H615    1.022   .     S
C616   O618    1.428   .     S
C616   C619    1.531   .     S
C616   H617    1.105   .     S
O618   C627    1.418   .     S
C619   O621    1.450   .     S
C619   C622    1.517   .     S
C619   H620    1.103   .     S
C622   O625    1.425   .     S
C622   H623    1.099   .     S
C622   H624    1.106   .     S
O625   H626    0.978   .     S
C627   O642    1.411   .     S
C627   C629    1.531   .     S
C627   H628    1.101   .     S
C629   O631    1.425   .     S
C629   C633    1.525   .     S
C629   H630    1.101   .     S
O631   H632    1.005   .     S
C633   O635    1.422   .     S
C633   C637    1.529   .     S
C633   H634    1.107   .     S
O635   H636    0.990   .     S
C637   O639    1.440   .     S
C637   C640    1.540   .     S
C637   H638    1.104   .     S
O639   C648    1.416   .     S
C640   O642    1.442   .     S
C640   C643    1.526   .     S
C640   H641    1.106   .     S
C643   O646    1.427   .     S
C643   H645    1.100   .     S
C643   H644    1.102   .     S
O646   H647    0.998   .     S
C648   O663    1.413   .     S
C648   C650    1.540   .     S
C648   H649    1.100   .     S
C650   O652    1.407   .     S
C650   C654    1.537   .     S
C650   H651    1.112   .     S
O652   H653    1.018   .     S
C654   O656    1.424   .     S
C654   C658    1.529   .     S
C654   H655    1.103   .     S
O656   H657    0.991   .     S
C658   O660    1.428   .     S
C658   C661    1.543   .     S
C658   H659    1.104   .     S
O660   C669    1.421   .     S
C661   O663    1.442   .     S
C661   C664    1.529   .     S
C661   H662    1.107   .     S
C664   O667    1.428   .     S
C664   H665    1.100   .     S
C664   H666    1.100   .     S
O667   H668    0.997   .     S
C669   O684    1.410   .     S
C669   C671    1.531   .     S
C669   H670    1.101   .     S
C671   O673    1.424   .     S
C671   C675    1.532   .     S
C671   H672    1.102   .     S
O673   H674    0.992   .     S
C675   O677    1.432   .     S
C675   C679    1.530   .     S
C675   H676    1.105   .     S
O677   H678    0.997   .     S
C679   O681    1.435   .     S
C679   C682    1.542   .     S
C679   H680    1.103   .     S
O681   C690    1.432   .     S
C682   O684    1.444   .     S
C682   C685    1.525   .     S
C682   H683    1.106   .     S
C685   O688    1.425   .     S
C685   H687    1.098   .     S
C685   H686    1.102   .     S
O688   H689    0.983   .     S
C690   O705    1.400   .     S
C690   C692    1.530   .     S
C690   H691    1.101   .     S
C692   O694    1.422   .     S
C692   C696    1.527   .     S
C692   H693    1.102   .     S
O694   H695    0.990   .     S
C696   O698    1.425   .     S
C696   C700    1.528   .     S
C696   H697    1.103   .     S
O698   H699    0.988   .     S
C700   O702    1.442   .     S
C700   C703    1.540   .     S
C700   H701    1.102   .     S
O702   C711    1.409   .     S
C703   O705    1.443   .     S
C703   C706    1.518   .     S
C703   H704    1.106   .     S
C706   O709    1.427   .     S
C706   H707    1.101   .     S
C706   H708    1.099   .     S
O709   H710    0.990   .     S
C711   O726    1.416   .     S
C711   C713    1.540   .     S
C711   H712    1.101   .     S
C713   O715    1.423   .     S
C713   C717    1.528   .     S
C713   H714    1.106   .     S
O715   H716    0.990   .     S
C717   O719    1.434   .     S
C717   C721    1.523   .     S
C717   H718    1.103   .     S
O719   H720    1.014   .     S
C721   O723    1.432   .     S
C721   C724    1.531   .     S
C721   H722    1.103   .     S
O723   C732    1.415   .     S
C724   O726    1.443   .     S
C724   C727    1.527   .     S
C724   H725    1.105   .     S
C727   O730    1.425   .     S
C727   H728    1.102   .     S
C727   H729    1.098   .     S
O730   H731    1.000   .     S
C732   O747    1.428   .     S
C732   C734    1.535   .     S
C732   H733    1.100   .     S
C734   O736    1.420   .     S
C734   C738    1.535   .     S
C734   H735    1.100   .     S
O736   H737    0.987   .     S
C738   O740    1.413   .     S
C738   C742    1.535   .     S
C738   H739    1.106   .     S
O740   H741    0.993   .     S
C742   O744    1.428   .     S
C742   C745    1.530   .     S
C742   H743    1.105   .     S
C745   O747    1.446   .     S
C745   C748    1.519   .     S
C745   H746    1.106   .     S
C748   O751    1.426   .     S
C748   H750    1.103   .     S
C748   H749    1.100   .     S
O751   H752    0.983   .     S
O753   H797    0.977   .     S
O753   H798    1.004   .     S
O754   H793    0.999   .     S
O754   H794    0.990   .     S
O755   H795    0.989   .     S
O755   H796    0.981   .     S
O756   H801    0.993   .     S
O756   H802    0.999   .     S
O757   H789    1.017   .     S
O757   H790    0.973   .     S
O758   H787    1.001   .     S
O758   H788    0.990   .     S
O759   H791    0.998   .     S
O759   H792    0.983   .     S
O760   H799    0.986   .     S
O760   H800    1.016   .     S
O761   H803    0.982   .     S
O761   H804    1.006   .     S
O762   H807    0.980   .     S
O762   H808    0.995   .     S
O763   H785    0.982   .     S
O763   H786    0.979   .     S
O764   H805    1.003   .     S
O764   H806    0.994   .     S
