# Supplementary material for: 17-β-Estradiol—β-Cyclodextrin Complex as Solid: Synthesis, Structural and Physicochemical Characterization
Source: Molecules. 2023 Apr 26;28(9):3747. doi: 10.3390/molecules28093747 (PMC10180119; doi:10.3390/molecules28093747)
Supplement: Supplementary file 1 [file molecules-28-03747-s001.zip › DAADopt.cif]

data_zoptymalizowanyABBA
_audit_creation_date              2023-03-31
_audit_creation_method            'owner'
_symmetry_space_group_name_H-M    ' '
_symmetry_Int_Tables_number       0
_symmetry_cell_setting            monoclinic
loop_
_symmetry_equiv_pos_as_xyz
  x,y,z
  -y,-x,-z
_cell_length_a                    15.4857
_cell_length_b                    15.4857
_cell_length_c                    31.7007
_cell_angle_alpha                 101.3161
_cell_angle_beta                  101.3161
_cell_angle_gamma                 101.4437
loop_
_atom_site_label
_atom_site_type_symbol
_atom_site_fract_x
_atom_site_fract_y
_atom_site_fract_z
_atom_site_U_iso_or_equiv
_atom_site_adp_type
_atom_site_occupancy
H1     H    -0.14035  -0.53824  -0.93462   0.00000  Uiso   1.00
H2     H    -0.08977  -0.56122  -0.97228   0.00000  Uiso   1.00
H3     H    -0.79837  -0.04840  -0.06798   0.00000  Uiso   1.00
H4     H    -0.85409  -0.04105  -0.03276   0.00000  Uiso   1.00
H5     H    -0.89508  -0.83320  -0.10103   0.00000  Uiso   1.00
H6     H    -0.97707  -0.91434  -0.13025   0.00000  Uiso   1.00
H7     H    -0.85150  -0.95545  -0.10909   0.00000  Uiso   1.00
H8     H    -0.84732  -1.03595  -0.14572   0.00000  Uiso   1.00
H9     H    -0.97534  -0.04934  -0.19848   0.00000  Uiso   1.00
H10    H    -0.98407  -0.13469  -0.17957   0.00000  Uiso   1.00
H11    H    -0.99977  -0.27435  -0.26297   0.00000  Uiso   1.00
H12    H    -0.95019  -0.17197  -0.24381   0.00000  Uiso   1.00
H13    H    -0.72936   0.00033  -0.24599   0.00000  Uiso   1.00
H14    H    -0.81214  -0.07593  -0.27775   0.00000  Uiso   1.00
H15    H    -0.27668  -0.80718  -0.21769   0.00000  Uiso   1.00
H16    H    -0.30169  -0.89417  -0.25562   0.00000  Uiso   1.00
H17    H    -0.06292  -0.91456  -0.19629   0.00000  Uiso   1.00
H18    H    -0.10433  -0.99446  -0.17577   0.00000  Uiso   1.00
H19    H    -0.16702  -0.78814  -0.30777   0.00000  Uiso   1.00
H20    H    -0.09854  -0.83173  -0.28236   0.00000  Uiso   1.00
H21    H    -0.02699  -0.99361  -0.30590   0.00000  Uiso   1.00
H22    H     0.06422  -0.95760  -0.26835   0.00000  Uiso   1.00
H23    H    -0.06721  -0.76951  -0.21430   0.00000  Uiso   1.00
H24    H    -0.15988  -0.84604  -0.22528   0.00000  Uiso   1.00
H25    H    -0.02307  -0.62796  -0.04114   0.00000  Uiso   1.00
H26    H    -0.05790  -0.73166  -0.06247   0.00000  Uiso   1.00
H27    H    -0.14120  -0.55507  -0.43560   0.00000  Uiso   1.00
H28    H    -0.08292  -0.57824  -0.47041   0.00000  Uiso   1.00
H29    H    -0.05152  -0.00296  -0.39934   0.00000  Uiso   1.00
H30    H    -0.07045  -0.02386  -0.45152   0.00000  Uiso   1.00
H31    H    -0.02284  -0.12833  -0.41978   0.00000  Uiso   1.00
H32    H     0.03662  -0.16053  -0.38316   0.00000  Uiso   1.00
H33    H    -0.03985  -0.67515  -0.52580   0.00000  Uiso   1.00
H34    H    -0.13302  -0.74464  -0.54368   0.00000  Uiso   1.00
H35    H    -0.92541  -0.06494  -0.68541   0.00000  Uiso   1.00
H36    H    -0.95991  -0.13992  -0.66229   0.00000  Uiso   1.00
H37    H    -0.95341  -0.20938  -0.45261   0.00000  Uiso   1.00
H38    H    -0.95140  -0.20929  -0.50267   0.00000  Uiso   1.00
H39    H    -0.15536  -1.04269  -0.36049   0.00000  Uiso   1.00
H40    H    -0.12667  -0.93308  -0.34425   0.00000  Uiso   1.00
C41    C    -0.19181  -0.20368  -0.83541   0.06007  Uani   1.00
H42    H    -0.12064  -0.19532  -0.83744   0.06900  Uiso   1.00
C43    C    -0.19964  -0.13752  -0.79457   0.05650  Uani   1.00
H44    H    -0.16494  -0.06845  -0.79489   0.06600  Uiso   1.00
O45    O    -0.15267  -0.16009  -0.75571   0.06285  Uani   1.00
H46    H    -0.18112  -0.14461  -0.73101   0.09100  Uiso   1.00
C47    C    -0.29849  -0.14081  -0.79516   0.04719  Uani   1.00
H48    H    -0.33119  -0.20736  -0.79046   0.05400  Uiso   1.00
O49    O    -0.29876  -0.06963  -0.75914   0.05148  Uani   1.00
H50    H    -0.36300  -0.07179  -0.75776   0.07500  Uiso   1.00
C51    C    -0.35251  -0.13280  -0.83998   0.05323  Uani   1.00
H52    H    -0.33278  -0.06241  -0.84355   0.06200  Uiso   1.00
O53    O    -0.44608  -0.15722  -0.84037   0.04680  Uani   1.00
C54    C    -0.33509  -0.19838  -0.87874   0.06692  Uani   1.00
H55    H    -0.36179  -0.26844  -0.87644   0.07700  Uiso   1.00
O56    O    -0.23841  -0.18416  -0.87453   0.07209  Uani   1.00
C57    C    -0.37891  -0.18813  -0.92409   0.09341  Uani   1.00
H58    H    -0.45055  -0.18816  -0.92534   0.10800  Uiso   1.00
H59    H    -0.34589  -0.12341  -0.92999   0.10800  Uiso   1.00
O60    O    -0.37193  -0.25890  -0.95952   0.18009  Uani   1.00
H61    H    -0.39264  -0.31713  -0.95269   0.26200  Uiso   1.00
C62    C    -0.49602  -0.08876  -0.84003   0.04750  Uani   1.00
H63    H    -0.45034  -0.02166  -0.83559   0.05600  Uiso   1.00
C64    C    -0.54289  -0.08812  -0.80174   0.04512  Uani   1.00
H65    H    -0.58114  -0.03528  -0.80188   0.05300  Uiso   1.00
O66    O    -0.47258  -0.06208  -0.76072   0.04859  Uani   1.00
H67    H    -0.49571  -0.07933  -0.73568   0.07100  Uiso   1.00
C68    C    -0.60984  -0.17957  -0.80941   0.04697  Uani   1.00
H69    H    -0.57362  -0.23444  -0.81042   0.05500  Uiso   1.00
O70    O    -0.65455  -0.17637  -0.77415   0.05433  Uani   1.00
H71    H    -0.72039  -0.20907  -0.78493   0.08000  Uiso   1.00
C72    C    -0.67697  -0.19683  -0.85449   0.04740  Uani   1.00
H73    H    -0.71740  -0.14564  -0.85228   0.05600  Uiso   1.00
O74    O    -0.73524  -0.28603  -0.86365   0.04956  Uani   1.00
C75    C    -0.62872  -0.18965  -0.89213   0.05004  Uani   1.00
H76    H    -0.59652  -0.24714  -0.89742   0.05900  Uiso   1.00
O77    O    -0.55979  -0.10483  -0.88060   0.05103  Uani   1.00
C78    C    -0.69304  -0.19361  -0.93604   0.05992  Uani   1.00
H79    H    -0.65087  -0.18007  -0.95953   0.07100  Uiso   1.00
H80    H    -0.73612  -0.26337  -0.94913   0.07100  Uiso   1.00
O81    O    -0.74606  -0.12887  -0.93115   0.06516  Uani   1.00
H82    H    -0.81104  -0.15817  -0.94526   0.09500  Uiso   1.00
C83    C    -0.83043  -0.29368  -0.87734   0.05120  Uani   1.00
H84    H    -0.84145  -0.22932  -0.88416   0.06000  Uiso   1.00
C85    C    -0.87590  -0.31595  -0.84089   0.04828  Uani   1.00
H86    H    -0.94764  -0.31400  -0.85092   0.05600  Uiso   1.00
O87    O    -0.83185  -0.24860  -0.80107   0.05535  Uani   1.00
H88    H    -0.87654  -0.23874  -0.78255   0.08100  Uiso   1.00
C89    C    -0.87409  -0.41178  -0.83562   0.04609  Uani   1.00
H90    H    -0.80279  -0.41623  -0.82605   0.05400  Uiso   1.00
O91    O    -0.91806  -0.42912  -0.80133   0.05134  Uani   1.00
H92    H    -0.87626  -0.38795  -0.77331   0.07600  Uiso   1.00
C93    C    -0.92036  -0.47983  -0.88018   0.04882  Uani   1.00
H94    H    -0.99225  -0.47817  -0.88986   0.05700  Uiso   1.00
O95    O    -0.91367  -0.56847  -0.87476   0.04912  Uani   1.00
C96    C    -0.86950  -0.45196  -0.91497   0.06013  Uani   1.00
H97    H    -0.79850  -0.45652  -0.90391   0.07100  Uiso   1.00
O98    O    -0.86989  -0.36002  -0.91734   0.06220  Uani   1.00
C99    C    -0.90298  -0.50864  -0.96286   0.09201  Uani   1.00
H100   H    -0.85524  -0.48008  -0.98115   0.10800  Uiso   1.00
H101   H    -0.89887  -0.57875  -0.96365   0.10800  Uiso   1.00
O102   O    -0.99388  -0.51336  -0.98535   0.12843  Uani   1.00
H103   H    -0.99985  -0.45336  -0.99170   0.19000  Uiso   1.00
C104   C    -0.99118  -0.64136  -0.89295   0.05587  Uani   1.00
H105   H    -1.05251  -0.61660  -0.90125   0.06500  Uiso   1.00
C106   C    -1.00056  -0.70191  -0.86044   0.05807  Uani   1.00
H107   H    -1.06098  -0.75877  -0.87654   0.06700  Uiso   1.00
O108   O    -1.01241  -0.65061  -0.82069   0.05904  Uani   1.00
H109   H    -1.05525  -0.68800  -0.80804   0.08600  Uiso   1.00
C110   C    -0.91604  -0.74010  -0.85278   0.05225  Uani   1.00
H111   H    -0.85599  -0.68277  -0.83741   0.06100  Uiso   1.00
O112   O    -0.92265  -0.79805  -0.82232   0.05983  Uani   1.00
H113   H    -0.92402  -0.75721  -0.79318   0.08700  Uiso   1.00
C114   C    -0.90350  -0.79191  -0.89664   0.05729  Uani   1.00
H115   H    -0.95765  -0.85541  -0.91024   0.06600  Uiso   1.00
O116   O    -0.81635  -0.81301  -0.88783   0.05836  Uani   1.00
C117   C    -0.90710  -0.73193  -0.93032   0.06769  Uani   1.00
H118   H    -0.84555  -0.67523  -0.91860   0.07900  Uiso   1.00
O119   O    -0.98673  -0.69631  -0.93377   0.06328  Uani   1.00
C120   C    -0.91208  -0.78200  -0.97730   0.04400  Uiso   1.00
H121   H    -0.91152  -0.73387  -0.99866   0.05300  Uiso   1.00
H122   H    -0.85278  -0.81085  -0.97774   0.05300  Uiso   1.00
O123   O    -0.99205  -0.85467  -0.99355   0.06100  Uiso   1.00
H124   H    -1.04091  -0.83501  -1.01151   0.09100  Uiso   1.00
C125   C    -0.80812  -0.90207  -0.90881   0.05696  Uani   1.00
H126   H    -0.87629  -0.94798  -0.92304   0.06600  Uiso   1.00
C127   C    -0.75339  -0.93379  -0.87163   0.05728  Uani   1.00
H128   H    -0.75283  -1.00513  -0.88405   0.06600  Uiso   1.00
O129   O    -0.79753  -0.92930  -0.83572   0.06504  Uani   1.00
H130   H    -0.82245  -0.87555  -0.83503   0.09400  Uiso   1.00
C131   C    -0.65582  -0.87512  -0.85630   0.05208  Uani   1.00
H132   H    -0.65672  -0.80361  -0.84375   0.06000  Uiso   1.00
O133   O    -0.60046  -0.90348  -0.82275   0.05472  Uani   1.00
H134   H    -0.61964  -0.89021  -0.79462   0.07900  Uiso   1.00
C135   C    -0.61412  -0.88198  -0.89613   0.05166  Uani   1.00
H136   H    -0.60707  -0.95190  -0.90673   0.06000  Uiso   1.00
O137   O    -0.52670  -0.81878  -0.88267   0.05303  Uani   1.00
C138   C    -0.67212  -0.85724  -0.93502   0.05103  Uani   1.00
H139   H    -0.66348  -0.78262  -0.92651   0.06000  Uiso   1.00
O140   O    -0.76734  -0.90196  -0.94456   0.05847  Uani   1.00
C141   C    -0.64182  -0.88312  -0.97789   0.06239  Uani   1.00
H142   H    -0.68939  -0.86936  -1.00503   0.07300  Uiso   1.00
H143   H    -0.57405  -0.83970  -0.97417   0.07300  Uiso   1.00
O144   O    -0.63581  -0.97517  -0.98846   0.06086  Uani   1.00
H145   H    -0.69748  -1.01376  -1.00512   0.08800  Uiso   1.00
C146   C    -0.45003  -0.85098  -0.89019   0.05825  Uani   1.00
H147   H    -0.46950  -0.92506  -0.90382   0.06900  Uiso   1.00
C148   C    -0.37957  -0.82494  -0.84536   0.04963  Uani   1.00
H149   H    -0.31980  -0.84972  -0.85125   0.05800  Uiso   1.00
O150   O    -0.41097  -0.86837  -0.81404   0.04898  Uani   1.00
H151   H    -0.47499  -0.86632  -0.81520   0.07100  Uiso   1.00
C152   C    -0.35150  -0.72096  -0.83021   0.04953  Uani   1.00
H153   H    -0.41207  -0.69511  -0.82707   0.05900  Uiso   1.00
O154   O    -0.28721  -0.69264  -0.78823   0.05482  Uani   1.00
H155   H    -0.25899  -0.62679  -0.78255   0.08000  Uiso   1.00
C156   C    -0.31113  -0.68580  -0.86556   0.05682  Uani   1.00
H157   H    -0.25171  -0.71338  -0.86895   0.06700  Uiso   1.00
O158   O    -0.28146  -0.58817  -0.85132   0.05357  Uani   1.00
C159   C    -0.37983  -0.71678  -0.91081   0.08020  Uani   1.00
H160   H    -0.43699  -0.68417  -0.90932   0.09600  Uiso   1.00
O161   O    -0.41359  -0.81421  -0.92231   0.07604  Uani   1.00
C162   C    -0.33870  -0.69268  -0.94796   0.09549  Uani   1.00
H163   H    -0.38845  -0.72784  -0.97961   0.11300  Uiso   1.00
H164   H    -0.32697  -0.61880  -0.94426   0.11300  Uiso   1.00
O165   O    -0.25492  -0.71869  -0.94694   0.15527  Uani   1.00
H166   H    -0.21276  -0.67243  -0.95632   0.22700  Uiso   1.00
C167   C    -0.18874  -0.55011  -0.84742   0.05155  Uani   1.00
H168   H    -0.15196  -0.60373  -0.85183   0.06000  Uiso   1.00
C169   C    -0.14494  -0.48442  -0.80167   0.04774  Uani   1.00
H170   H    -0.07104  -0.46662  -0.79899   0.05500  Uiso   1.00
O171   O    -0.16450  -0.53117  -0.76870   0.05171  Uani   1.00
H172   H    -0.14365  -0.48878  -0.73913   0.07500  Uiso   1.00
C173   C    -0.17959  -0.39902  -0.79753   0.04384  Uani   1.00
H174   H    -0.25082  -0.41594  -0.79502   0.05100  Uiso   1.00
O175   O    -0.12465  -0.33413  -0.75758   0.05039  Uani   1.00
H176   H    -0.14301  -0.27594  -0.75604   0.07400  Uiso   1.00
C177   C    -0.17644  -0.35796  -0.83712   0.04968  Uani   1.00
H178   H    -0.10539  -0.32441  -0.83519   0.05800  Uiso   1.00
O179   O    -0.22969  -0.29228  -0.83320   0.05365  Uani   1.00
C180   C    -0.21582  -0.42794  -0.88149   0.05787  Uani   1.00
H181   H    -0.29032  -0.45043  -0.88665   0.06800  Uiso   1.00
O182   O    -0.17596  -0.50429  -0.88118   0.06289  Uani   1.00
C183   C    -0.19422  -0.39018  -0.92043   0.09210  Uani   1.00
H184   H    -0.22905  -0.44220  -0.95143   0.11000  Uiso   1.00
H185   H    -0.22225  -0.33032  -0.92149   0.11000  Uiso   1.00
O186   O    -0.10002  -0.37088  -0.91856   0.10974  Uani   1.00
H187   H    -0.07033  -0.30627  -0.90428   0.16300  Uiso   1.00
O188   O    -0.65636  -0.47353  -0.97229   0.23000  Uiso   1.00
H189   H    -0.70056  -0.53133  -0.98855   0.34900  Uiso   1.00
C190   C    -0.65606  -0.53995  -0.90892   0.11500  Uiso   1.00
H191   H    -0.71827  -0.59174  -0.92695   0.13700  Uiso   1.00
C192   C    -0.61871  -0.47588  -0.93002   0.12200  Uiso   1.00
C193   C    -0.53994  -0.40905  -0.90636   0.15000  Uiso   1.00
H194   H    -0.51260  -0.35756  -0.92248   0.18000  Uiso   1.00
C195   C    -0.49924  -0.40902  -0.86312   0.12000  Uiso   1.00
H196   H    -0.43745  -0.35677  -0.84565   0.14400  Uiso   1.00
C197   C    -0.53540  -0.47308  -0.84145   0.09100  Uiso   1.00
C198   C    -0.61667  -0.53821  -0.86491   0.09100  Uiso   1.00
C199   C    -0.66681  -0.60370  -0.84314   0.09700  Uiso   1.00
H200   H    -0.69294  -0.67141  -0.86609   0.11600  Uiso   1.00
H201   H    -0.72787  -0.58060  -0.83784   0.11600  Uiso   1.00
C202   C    -0.61167  -0.61006  -0.79883   0.15000  Uiso   1.00
H203   H    -0.56422  -0.65340  -0.80432   0.17700  Uiso   1.00
H204   H    -0.65778  -0.64358  -0.78124   0.17700  Uiso   1.00
C205   C    -0.55683  -0.51618  -0.77035   0.09600  Uiso   1.00
H206   H    -0.60441  -0.47207  -0.76663   0.11500  Uiso   1.00
C207   C    -0.50613  -0.51950  -0.72452   0.09400  Uiso   1.00
H208   H    -0.45803  -0.56247  -0.73027   0.11300  Uiso   1.00
C209   C    -0.55913  -0.55802  -0.69329   0.11400  Uiso   1.00
H210   H    -0.58390  -0.63227  -0.70361   0.13700  Uiso   1.00
H211   H    -0.61954  -0.53082  -0.69262   0.13700  Uiso   1.00
C212   C    -0.48949  -0.52550  -0.64756   0.14000  Uiso   1.00
H213   H    -0.51802  -0.49164  -0.62161   0.17400  Uiso   1.00
H214   H    -0.46749  -0.58218  -0.63633   0.17400  Uiso   1.00
C215   C    -0.40725  -0.45667  -0.65348   0.13000  Uiso   1.00
H216   H    -0.35425  -0.49166  -0.66033   0.15500  Uiso   1.00
O217   O    -0.36113  -0.38598  -0.61456   0.13600  Uiso   1.00
H218   H    -0.40287  -0.34868  -0.60807   0.20400  Uiso   1.00
C219   C    -0.44628  -0.42641  -0.69558   0.11200  Uiso   1.00
C220   C    -0.50108  -0.35614  -0.68374   0.18000  Uiso   1.00
H221   H    -0.54993  -0.37771  -0.66463   0.26700  Uiso   1.00
H222   H    -0.45507  -0.29079  -0.66408   0.26700  Uiso   1.00
H223   H    -0.54052  -0.34218  -0.71328   0.26700  Uiso   1.00
C224   C    -0.37677  -0.38996  -0.72024   0.11000  Uiso   1.00
H225   H    -0.33117  -0.43618  -0.72351   0.13200  Uiso   1.00
H226   H    -0.33339  -0.32290  -0.70099   0.13200  Uiso   1.00
C227   C    -0.48780  -0.47519  -0.79488   0.08300  Uiso   1.00
H228   H    -0.44402  -0.52354  -0.79897   0.09900  Uiso   1.00
C229   C    -0.42364  -0.38407  -0.76676   0.08900  Uiso   1.00
H230   H    -0.46155  -0.33079  -0.76420   0.10600  Uiso   1.00
H231   H    -0.37077  -0.36191  -0.78375   0.10600  Uiso   1.00
O232   O    -0.10634  -0.07021  -0.89872   0.13600  Uiso   1.00
O233   O    -0.00577  -0.19021  -0.88296   0.10245  Uani   1.00
O234   O    -0.93335  -0.19716  -0.95984   0.06700  Uiso   1.00
O235   O    -0.14633  -0.58155  -0.96261   0.21300  Uiso   1.00
O236   O    -0.13020  -0.73532  -0.77502   0.10600  Uiso   1.00
O237   O    -0.32246  -0.98688  -0.93738   0.18200  Uiso   1.00
O238   O    -0.04022  -0.95330  -0.82017   0.17376  Uani   1.00
O239   O    -0.16516  -0.90722  -0.77470   0.17500  Uiso   1.00
O240   O    -0.90500  -0.05797  -0.80807   0.18100  Uiso   1.00
O241   O    -0.94923  -0.22157  -0.75369   0.07400  Uiso   1.00
O242   O    -0.02533  -0.02484  -0.42421   0.13600  Uiso   1.00
O243   O    -0.00652  -0.18535  -0.41314   0.10245  Uani   1.00
O244   O    -0.92042  -0.22554  -0.47649   0.06700  Uiso   1.00
O245   O    -0.14143  -0.59859  -0.46272   0.21300  Uiso   1.00
C246   C    -0.17947  -0.20930  -0.32974   0.06007  Uani   1.00
H247   H    -0.10671  -0.20032  -0.32853   0.06900  Uiso   1.00
C248   C    -0.19371  -0.15117  -0.28806   0.05650  Uani   1.00
H249   H    -0.15375  -0.08092  -0.28297   0.06600  Uiso   1.00
O250   O    -0.15936  -0.18692  -0.25175   0.06285  Uani   1.00
H251   H    -0.17087  -0.15399  -0.22455   0.09100  Uiso   1.00
C252   C    -0.29374  -0.15218  -0.29248   0.04719  Uani   1.00
H253   H    -0.33001  -0.21952  -0.29020   0.05400  Uiso   1.00
O254   O    -0.29791  -0.08288  -0.25635   0.05148  Uani   1.00
H255   H    -0.36395  -0.08862  -0.25576   0.07500  Uiso   1.00
C256   C    -0.34111  -0.13719  -0.33688   0.05323  Uani   1.00
H257   H    -0.32247  -0.06378  -0.33566   0.06200  Uiso   1.00
O258   O    -0.43733  -0.16793  -0.34329   0.04680  Uani   1.00
C259   C    -0.31454  -0.19163  -0.37621   0.06692  Uani   1.00
H260   H    -0.34623  -0.26436  -0.38061   0.07700  Uiso   1.00
O261   O    -0.21705  -0.17840  -0.36736   0.07209  Uani   1.00
C262   C    -0.34584  -0.16363  -0.41906   0.09341  Uani   1.00
H263   H    -0.41522  -0.15421  -0.42128   0.10800  Uiso   1.00
H264   H    -0.30142  -0.09808  -0.41841   0.10800  Uiso   1.00
O265   O    -0.34132  -0.22609  -0.45787   0.18009  Uani   1.00
H266   H    -0.38952  -0.28074  -0.46331   0.26200  Uiso   1.00
C267   C    -0.48890  -0.10150  -0.33734   0.04750  Uani   1.00
H268   H    -0.44410  -0.03295  -0.32983   0.05600  Uiso   1.00
C269   C    -0.53582  -0.11156  -0.29958   0.04512  Uani   1.00
H270   H    -0.56844  -0.05445  -0.29434   0.05300  Uiso   1.00
O271   O    -0.46841  -0.10535  -0.26053   0.04859  Uani   1.00
H272   H    -0.48962  -0.08899  -0.23313   0.07100  Uiso   1.00
C273   C    -0.60881  -0.20060  -0.31195   0.04697  Uani   1.00
H274   H    -0.57532  -0.25756  -0.31563   0.05500  Uiso   1.00
O275   O    -0.65302  -0.20267  -0.27666   0.05433  Uani   1.00
H276   H    -0.72019  -0.22822  -0.28819   0.08000  Uiso   1.00
C277   C    -0.67391  -0.20933  -0.35637   0.04740  Uani   1.00
H278   H    -0.71389  -0.15805  -0.35251   0.05600  Uiso   1.00
O279   O    -0.73275  -0.29883  -0.36960   0.04956  Uani   1.00
C280   C    -0.62170  -0.19515  -0.39205   0.05004  Uani   1.00
H281   H    -0.58759  -0.25113  -0.39819   0.05900  Uiso   1.00
O282   O    -0.55353  -0.10977  -0.37705   0.05103  Uani   1.00
C283   C    -0.68272  -0.19609  -0.43636   0.05992  Uani   1.00
H284   H    -0.63809  -0.17397  -0.45755   0.07100  Uiso   1.00
H285   H    -0.72105  -0.26686  -0.45219   0.07100  Uiso   1.00
O286   O    -0.74297  -0.13861  -0.43139   0.06516  Uani   1.00
H287   H    -0.80431  -0.17119  -0.45020   0.09500  Uiso   1.00
C288   C    -0.82815  -0.30616  -0.38319   0.05120  Uani   1.00
H289   H    -0.83939  -0.24235  -0.39062   0.06000  Uiso   1.00
C290   C    -0.87397  -0.32819  -0.34673   0.04828  Uani   1.00
H291   H    -0.94616  -0.32799  -0.35729   0.05600  Uiso   1.00
O292   O    -0.83172  -0.26177  -0.30636   0.05535  Uani   1.00
H293   H    -0.87975  -0.24427  -0.29143   0.08100  Uiso   1.00
C294   C    -0.86827  -0.42260  -0.34051   0.04609  Uani   1.00
H295   H    -0.79602  -0.42300  -0.33025   0.05400  Uiso   1.00
O296   O    -0.91194  -0.44092  -0.30639   0.05134  Uani   1.00
H297   H    -0.87662  -0.39352  -0.27876   0.07600  Uiso   1.00
C298   C    -0.91108  -0.49279  -0.38452   0.04882  Uani   1.00
H299   H    -0.98366  -0.49415  -0.39505   0.05700  Uiso   1.00
O300   O    -0.90108  -0.57938  -0.37775   0.04912  Uani   1.00
C301   C    -0.86077  -0.46425  -0.41929   0.06013  Uani   1.00
H302   H    -0.78865  -0.46483  -0.40747   0.07100  Uiso   1.00
O303   O    -0.86576  -0.37391  -0.42288   0.06220  Uani   1.00
C304   C    -0.89197  -0.52407  -0.46654   0.09201  Uani   1.00
H305   H    -0.85064  -0.49091  -0.48630   0.10800  Uiso   1.00
H306   H    -0.87702  -0.59022  -0.46643   0.10800  Uiso   1.00
O307   O    -0.98606  -0.54101  -0.48764   0.12843  Uani   1.00
H308   H    -0.99786  -0.48599  -0.49801   0.19000  Uiso   1.00
C309   C    -0.97395  -0.65548  -0.40045   0.05587  Uani   1.00
H310   H    -1.03644  -0.63391  -0.41110   0.06500  Uiso   1.00
C311   C    -0.98743  -0.72052  -0.37055   0.05807  Uani   1.00
H312   H    -1.04290  -0.77976  -0.39025   0.06700  Uiso   1.00
O313   O    -1.01155  -0.67902  -0.33195   0.05904  Uani   1.00
H314   H    -1.05089  -0.72848  -0.32349   0.08600  Uiso   1.00
C315   C    -0.89987  -0.75181  -0.35917   0.05225  Uani   1.00
H316   H    -0.84223  -0.69176  -0.34426   0.06100  Uiso   1.00
O317   O    -0.90687  -0.80636  -0.32727   0.05983  Uani   1.00
H318   H    -0.93257  -0.77146  -0.30539   0.08700  Uiso   1.00
C319   C    -0.88487  -0.80448  -0.40196   0.05729  Uani   1.00
H320   H    -0.93893  -0.86780  -0.41591   0.06600  Uiso   1.00
O321   O    -0.79791  -0.82546  -0.39160   0.05836  Uani   1.00
C322   C    -0.88315  -0.74379  -0.43525   0.06769  Uani   1.00
H323   H    -0.81871  -0.69035  -0.42241   0.07900  Uiso   1.00
O324   O    -0.95912  -0.70340  -0.44015   0.06328  Uani   1.00
C325   C    -0.88636  -0.79335  -0.48244   0.04400  Uiso   1.00
H326   H    -0.86592  -0.74247  -0.50083   0.05300  Uiso   1.00
H327   H    -0.83705  -0.83553  -0.48151   0.05300  Uiso   1.00
O328   O    -0.97419  -0.85090  -0.50447   0.06100  Uiso   1.00
H329   H    -1.01391  -0.81148  -0.51451   0.09100  Uiso   1.00
C330   C    -0.79069  -0.91521  -0.40854   0.05696  Uani   1.00
H331   H    -0.85884  -0.96113  -0.42298   0.06600  Uiso   1.00
C332   C    -0.73979  -0.94275  -0.36903   0.05728  Uani   1.00
H333   H    -0.73776  -1.01425  -0.37949   0.06600  Uiso   1.00
O334   O    -0.78749  -0.93633  -0.33451   0.06504  Uani   1.00
H335   H    -0.81607  -0.88503  -0.33499   0.09400  Uiso   1.00
C336   C    -0.64262  -0.88332  -0.35243   0.05208  Uani   1.00
H337   H    -0.64388  -0.81128  -0.34238   0.06000  Uiso   1.00
O338   O    -0.59559  -0.90943  -0.31493   0.05472  Uani   1.00
H339   H    -0.63392  -0.90445  -0.29326   0.07900  Uiso   1.00
C340   C    -0.59480  -0.89489  -0.38997   0.05166  Uani   1.00
H341   H    -0.58850  -0.96546  -0.39882   0.06000  Uiso   1.00
O342   O    -0.50555  -0.83378  -0.37381   0.05303  Uani   1.00
C343   C    -0.64944  -0.87142  -0.43070   0.05103  Uani   1.00
H344   H    -0.64581  -0.79790  -0.42220   0.06000  Uiso   1.00
O345   O    -0.74440  -0.92171  -0.44287   0.05847  Uani   1.00
C346   C    -0.61386  -0.89340  -0.47209   0.06239  Uani   1.00
H347   H    -0.66153  -0.88315  -0.50027   0.07300  Uiso   1.00
H348   H    -0.54788  -0.84605  -0.46726   0.07300  Uiso   1.00
O349   O    -0.60030  -0.98330  -0.48184   0.06086  Uani   1.00
H350   H    -0.65914  -1.02586  -0.49934   0.08800  Uiso   1.00
C351   C    -0.43172  -0.86413  -0.38726   0.05825  Uani   1.00
H352   H    -0.45288  -0.93798  -0.40187   0.06900  Uiso   1.00
C353   C    -0.35347  -0.84154  -0.34565   0.04963  Uani   1.00
H354   H    -0.30013  -0.87315  -0.35519   0.05800  Uiso   1.00
O355   O    -0.38231  -0.88336  -0.31270   0.04898  Uani   1.00
H356   H    -0.44336  -0.87487  -0.31256   0.07100  Uiso   1.00
C357   C    -0.31361  -0.73871  -0.32864   0.04953  Uani   1.00
H358   H    -0.36351  -0.70647  -0.31538   0.05900  Uiso   1.00
O359   O    -0.23391  -0.72394  -0.29401   0.05482  Uani   1.00
H360   H    -0.20464  -0.65787  -0.28331   0.08000  Uiso   1.00
C361   C    -0.28932  -0.69944  -0.36653   0.05682  Uani   1.00
H362   H    -0.23112  -0.72393  -0.37486   0.06700  Uiso   1.00
O363   O    -0.26321  -0.60179  -0.35203   0.05357  Uani   1.00
C364   C    -0.36585  -0.72898  -0.40896   0.08020  Uani   1.00
H365   H    -0.41996  -0.69340  -0.40474   0.09600  Uiso   1.00
O366   O    -0.40377  -0.82603  -0.42056   0.07604  Uani   1.00
C367   C    -0.32951  -0.70818  -0.44803   0.09549  Uani   1.00
H368   H    -0.38354  -0.73945  -0.47865   0.11300  Uiso   1.00
H369   H    -0.31155  -0.63405  -0.44378   0.11300  Uiso   1.00
O370   O    -0.25179  -0.74380  -0.45037   0.15527  Uani   1.00
H371   H    -0.20701  -0.69949  -0.45914   0.22700  Uiso   1.00
C372   C    -0.17347  -0.55864  -0.35201   0.05155  Uani   1.00
H373   H    -0.13457  -0.60967  -0.35896   0.06000  Uiso   1.00
C374   C    -0.12586  -0.49340  -0.30679   0.04774  Uani   1.00
H375   H    -0.05475  -0.46786  -0.30770   0.05500  Uiso   1.00
O376   O    -0.12902  -0.54155  -0.27274   0.05171  Uani   1.00
H377   H    -0.06639  -0.54443  -0.26018   0.07500  Uiso   1.00
C378   C    -0.16875  -0.41299  -0.29901   0.04384  Uani   1.00
H379   H    -0.23938  -0.43721  -0.29681   0.05100  Uiso   1.00
O380   O    -0.11711  -0.35020  -0.25796   0.05039  Uani   1.00
H381   H    -0.13996  -0.29407  -0.25500   0.07400  Uiso   1.00
C382   C    -0.16857  -0.36698  -0.33764   0.04968  Uani   1.00
H383   H    -0.09796  -0.33314  -0.33614   0.05800  Uiso   1.00
O384   O    -0.22159  -0.30080  -0.33332   0.05365  Uani   1.00
C385   C    -0.20915  -0.43344  -0.38311   0.05787  Uani   1.00
H386   H    -0.28365  -0.45550  -0.38813   0.06800  Uiso   1.00
O387   O    -0.17122  -0.51160  -0.38626   0.06289  Uani   1.00
C388   C    -0.18837  -0.39021  -0.42063   0.09210  Uani   1.00
H389   H    -0.21886  -0.44197  -0.45236   0.11000  Uiso   1.00
H390   H    -0.22170  -0.33380  -0.42137   0.11000  Uiso   1.00
O391   O    -0.09322  -0.36106  -0.41539   0.10974  Uani   1.00
H392   H    -0.07496  -0.29625  -0.41570   0.16300  Uiso   1.00
O393   O     0.01301  -1.01094  -0.28212   0.17376  Uani   1.00
O394   O    -0.10500  -0.98859  -0.35338   0.17500  Uiso   1.00
O395   O    -0.12004  -0.82325  -0.31257   0.10600  Uiso   1.00
O396   O    -0.26127  -0.93253  -0.45824   0.18200  Uiso   1.00
O397   O    -0.89339  -0.09701  -0.33232   0.18100  Uiso   1.00
O398   O    -0.96247  -0.22316  -0.27036   0.07400  Uiso   1.00
O399   O    -1.00193  -0.04990  -0.95833   0.09584  Uani   1.00
O400   O    -0.17262  -0.85652  -0.95232   0.20900  Uiso   1.00
H401   H    -0.21195  -0.81286  -0.95448   0.00000  Uiso   1.00
H402   H    -0.11232  -0.82110  -0.95160   0.00000  Uiso   1.00
H403   H    -1.03879  -0.05745  -0.93661   0.00000  Uiso   1.00
H404   H    -1.04474  -0.03260  -0.98088   0.00000  Uiso   1.00
loop_
_atom_site_aniso_label
_atom_site_aniso_U_11
_atom_site_aniso_U_22
_atom_site_aniso_U_33
_atom_site_aniso_U_12
_atom_site_aniso_U_13
_atom_site_aniso_U_23
C41       0.06302   0.06498   0.07985   0.02915   0.04758   0.03770
C43       0.04841   0.06217   0.07355   0.02189   0.02843   0.02843
O45       0.05107   0.07269   0.07880   0.02994   0.01913   0.03271
C47       0.05512   0.05316   0.05674   0.03236   0.03279   0.02908
O49       0.05205   0.06385   0.05359   0.03254   0.01865   0.02483
C51       0.06290   0.06486   0.05674   0.03194   0.03759   0.03265
O53       0.05741   0.04954   0.04833   0.02371   0.02178   0.02672
C54       0.09435   0.08845   0.05779   0.06164   0.04678   0.04184
O56       0.08658   0.10034   0.07460   0.05425   0.05747   0.05624
C57       0.13787   0.12804   0.05043   0.07996   0.04507   0.03519
O60       0.26286   0.21961   0.10822   0.14468   0.06263   0.05275
C62       0.05234   0.05037   0.05148   0.02450   0.01513   0.02501
C64       0.05574   0.05181   0.03888   0.03272   0.01051   0.01792
O66       0.05604   0.05211   0.04623   0.02577   0.01712   0.01465
C68       0.06335   0.05352   0.03783   0.02940   0.02007   0.02007
O70       0.04867   0.07619   0.04308   0.01742   0.01818   0.01694
C72       0.05874   0.05087   0.04518   0.02504   0.01720   0.02461
O74       0.06016   0.05623   0.04308   0.02698   0.01160   0.02519
C75       0.05839   0.05642   0.04098   0.02111   0.01196   0.01814
O77       0.05908   0.06105   0.04203   0.02377   0.01284   0.02395
C78       0.07214   0.06820   0.04308   0.01500   0.01738   0.02108
O81       0.06480   0.08643   0.05253   0.02552   0.00630   0.03718
C83       0.05686   0.05686   0.04308   0.02564   0.00262   0.01744
C85       0.04224   0.05600   0.05043   0.02008   0.00637   0.01872
O87       0.05233   0.06805   0.05043   0.02099   0.01959   0.01218
C89       0.04050   0.06802   0.04203   0.02159   0.01433   0.02915
O91       0.04882   0.06454   0.04308   0.01385   0.01443   0.01567
C93       0.05062   0.05258   0.05359   0.02692   0.00891   0.02620
O95       0.05004   0.06380   0.05043   0.03224   0.01662   0.03020
C96       0.08683   0.06718   0.03993   0.03345   0.02196   0.02319
O98       0.09154   0.05026   0.04938   0.02226   0.00521   0.02991
C99       0.14902   0.08218   0.05253   0.03211   0.01833   0.03686
O102      0.19575   0.08566   0.07565   0.03762  -0.03285   0.01780
C104      0.07694   0.06122   0.04413   0.04803   0.01073   0.01937
C106      0.06934   0.05951   0.06619   0.03538   0.02825   0.03195
O108      0.07180   0.05607   0.07565   0.03853   0.03904   0.03287
C110      0.07349   0.05777   0.04308   0.03950   0.01742   0.02606
O112      0.09052   0.05514   0.05464   0.04161   0.02883   0.02636
C114      0.06996   0.06603   0.04938   0.04113   0.01324   0.02188
O116      0.08462   0.06103   0.04203   0.04960   0.01007   0.01501
C117      0.08930   0.08733   0.04938   0.05274   0.02265   0.03253
O119      0.08877   0.06911   0.04833   0.05280   0.01324   0.02188
C125      0.08189   0.06026   0.04518   0.05002   0.01981   0.01363
C127      0.08264   0.06495   0.04308   0.05129   0.01861   0.01985
O129      0.09021   0.08824   0.04413   0.06381   0.02737   0.02614
C131      0.07534   0.06354   0.03362   0.04766   0.01280   0.01897
O133      0.06587   0.08160   0.03888   0.04470   0.02468   0.02715
C135      0.07725   0.05366   0.03572   0.03569   0.01774   0.01403
O137      0.08183   0.04448   0.03572   0.02468   0.00963   0.01210
C138      0.06952   0.05183   0.03572   0.02583   0.01458   0.00716
O140      0.08266   0.06300   0.03783   0.04161   0.01087   0.01087
C141      0.08195   0.07605   0.03572   0.02746   0.01879   0.01632
O144      0.07856   0.08053   0.03888   0.04688   0.02210   0.01469
C146      0.08314   0.05562   0.04623   0.01711   0.03642   0.01542
C148      0.06755   0.05379   0.03783   0.02583   0.02210   0.01469
O150      0.06070   0.05677   0.03993   0.02244   0.01698   0.02315
C152      0.06956   0.05384   0.03047   0.01814   0.01527   0.01650
O154      0.06677   0.06873   0.03783   0.02274   0.01574   0.02439
C156      0.07814   0.05652   0.03572   0.01651   0.01316   0.01192
O158      0.05636   0.05833   0.04938   0.01451   0.00931   0.02413
C159      0.10370   0.08601   0.04203  -0.00170   0.00503   0.03343
O161      0.10048   0.08475   0.03467   0.00187   0.02599   0.00746
C162      0.09156   0.09549   0.09351  -0.00303   0.01877   0.03976
O165      0.20189   0.19009   0.11453   0.07548   0.07539   0.06675
C167      0.06262   0.06066   0.04833   0.02752   0.03046   0.02305
C169      0.04422   0.06781   0.04728   0.02915   0.02218   0.02465
O171      0.05423   0.06603   0.04833   0.03036   0.01596   0.02584
C173      0.04334   0.05514   0.04098   0.01730   0.01818   0.01694
O175      0.06246   0.05853   0.04203   0.02201   0.02319   0.02196
C177      0.05154   0.05940   0.05359   0.02571   0.02817   0.02200
O179      0.05266   0.07232   0.06199   0.03200   0.03494   0.03864
C180      0.07463   0.06087   0.04938   0.02274   0.01931   0.02919
O182      0.09489   0.05754   0.04413   0.01959   0.02773   0.01909
C183      0.14908   0.06652   0.05043   0.01995   0.00593   0.01581
O186      0.18515   0.07703   0.08301   0.01130   0.07803   0.03233
O233      0.08902   0.13226   0.10087   0.03441   0.03930   0.03930
O238      0.12816   0.09277   0.27318  -0.04925   0.13463  -0.02594
O243      0.08902   0.13226   0.10087   0.03441   0.03930   0.03930
C246      0.06302   0.06498   0.07985   0.02915   0.04758   0.03770
C248      0.04841   0.06217   0.07355   0.02189   0.02843   0.02843
O250      0.05107   0.07269   0.07880   0.02994   0.01913   0.03271
C252      0.05512   0.05316   0.05674   0.03236   0.03279   0.02908
O254      0.05205   0.06385   0.05359   0.03254   0.01865   0.02483
C256      0.06290   0.06486   0.05674   0.03194   0.03759   0.03265
O258      0.05741   0.04954   0.04833   0.02371   0.02178   0.02672
C259      0.09435   0.08845   0.05779   0.06164   0.04678   0.04184
O261      0.08658   0.10034   0.07460   0.05425   0.05747   0.05624
C262      0.13787   0.12804   0.05043   0.07996   0.04507   0.03519
O265      0.26286   0.21961   0.10822   0.14468   0.06263   0.05275
C267      0.05234   0.05037   0.05148   0.02450   0.01513   0.02501
C269      0.05574   0.05181   0.03888   0.03272   0.01051   0.01792
O271      0.05604   0.05211   0.04623   0.02577   0.01712   0.01465
C273      0.06335   0.05352   0.03783   0.02940   0.02007   0.02007
O275      0.04867   0.07619   0.04308   0.01742   0.01818   0.01694
C277      0.05874   0.05087   0.04518   0.02504   0.01720   0.02461
O279      0.06016   0.05623   0.04308   0.02698   0.01160   0.02519
C280      0.05839   0.05642   0.04098   0.02111   0.01196   0.01814
O282      0.05908   0.06105   0.04203   0.02377   0.01284   0.02395
C283      0.07214   0.06820   0.04308   0.01500   0.01738   0.02108
O286      0.06480   0.08643   0.05253   0.02552   0.00630   0.03718
C288      0.05686   0.05686   0.04308   0.02564   0.00262   0.01744
C290      0.04224   0.05600   0.05043   0.02008   0.00637   0.01872
O292      0.05233   0.06805   0.05043   0.02099   0.01959   0.01218
C294      0.04050   0.06802   0.04203   0.02159   0.01433   0.02915
O296      0.04882   0.06454   0.04308   0.01385   0.01443   0.01567
C298      0.05062   0.05258   0.05359   0.02692   0.00891   0.02620
O300      0.05004   0.06380   0.05043   0.03224   0.01662   0.03020
C301      0.08683   0.06718   0.03993   0.03345   0.02196   0.02319
O303      0.09154   0.05026   0.04938   0.02226   0.00521   0.02991
C304      0.14902   0.08218   0.05253   0.03211   0.01833   0.03686
O307      0.19575   0.08566   0.07565   0.03762  -0.03285   0.01780
C309      0.07694   0.06122   0.04413   0.04803   0.01073   0.01937
C311      0.06934   0.05951   0.06619   0.03538   0.02825   0.03195
O313      0.07180   0.05607   0.07565   0.03853   0.03904   0.03287
C315      0.07349   0.05777   0.04308   0.03950   0.01742   0.02606
O317      0.09052   0.05514   0.05464   0.04161   0.02883   0.02636
C319      0.06996   0.06603   0.04938   0.04113   0.01324   0.02188
O321      0.08462   0.06103   0.04203   0.04960   0.01007   0.01501
C322      0.08930   0.08733   0.04938   0.05274   0.02265   0.03253
O324      0.08877   0.06911   0.04833   0.05280   0.01324   0.02188
C330      0.08189   0.06026   0.04518   0.05002   0.01981   0.01363
C332      0.08264   0.06495   0.04308   0.05129   0.01861   0.01985
O334      0.09021   0.08824   0.04413   0.06381   0.02737   0.02614
C336      0.07534   0.06354   0.03362   0.04766   0.01280   0.01897
O338      0.06587   0.08160   0.03888   0.04470   0.02468   0.02715
C340      0.07725   0.05366   0.03572   0.03569   0.01774   0.01403
O342      0.08183   0.04448   0.03572   0.02468   0.00963   0.01210
C343      0.06952   0.05183   0.03572   0.02583   0.01458   0.00716
O345      0.08266   0.06300   0.03783   0.04161   0.01087   0.01087
C346      0.08195   0.07605   0.03572   0.02746   0.01879   0.01632
O349      0.07856   0.08053   0.03888   0.04688   0.02210   0.01469
C351      0.08314   0.05562   0.04623   0.01711   0.03642   0.01542
C353      0.06755   0.05379   0.03783   0.02583   0.02210   0.01469
O355      0.06070   0.05677   0.03993   0.02244   0.01698   0.02315
C357      0.06956   0.05384   0.03047   0.01814   0.01527   0.01650
O359      0.06677   0.06873   0.03783   0.02274   0.01574   0.02439
C361      0.07814   0.05652   0.03572   0.01651   0.01316   0.01192
O363      0.05636   0.05833   0.04938   0.01451   0.00931   0.02413
C364      0.10370   0.08601   0.04203  -0.00170   0.00503   0.03343
O366      0.10048   0.08475   0.03467   0.00187   0.02599   0.00746
C367      0.09156   0.09549   0.09351  -0.00303   0.01877   0.03976
O370      0.20189   0.19009   0.11453   0.07548   0.07539   0.06675
C372      0.06262   0.06066   0.04833   0.02752   0.03046   0.02305
C374      0.04422   0.06781   0.04728   0.02915   0.02218   0.02465
O376      0.05423   0.06603   0.04833   0.03036   0.01596   0.02584
C378      0.04334   0.05514   0.04098   0.01730   0.01818   0.01694
O380      0.06246   0.05853   0.04203   0.02201   0.02319   0.02196
C382      0.05154   0.05940   0.05359   0.02571   0.02817   0.02200
O384      0.05266   0.07232   0.06199   0.03200   0.03494   0.03864
C385      0.07463   0.06087   0.04938   0.02274   0.01931   0.02919
O387      0.09489   0.05754   0.04413   0.01959   0.02773   0.01909
C388      0.14908   0.06652   0.05043   0.01995   0.00593   0.01581
O391      0.18515   0.07703   0.08301   0.01130   0.07803   0.03233
O393      0.12816   0.09277   0.27318  -0.04925   0.13463  -0.02594
O399      0.08892   0.08892   0.11242   0.03883   0.01923   0.01923
loop_
_geom_bond_atom_site_label_1
_geom_bond_atom_site_label_2
_geom_bond_distance
_geom_bond_site_symmetry_2
_ccdc_geom_bond_type
H1     O235    0.977   .     S
H2     O235    0.997   .     S
H3     O234    0.988   2_444 S
H4     O234    1.002   2_444 S
H5     O232    0.980   2_444 S
H6     O232    1.005   2_444 S
H7     O233    1.000   2_444 S
H8     O233    0.998   2_444 S
H9     O240    0.985   2_444 S
H10    O240    0.996   2_444 S
H11    O398    0.981   .     S
H12    O398    0.994   .     S
H13    O241    0.979   2_444 S
H14    O241    0.990   2_444 S
H15    O236    1.014   2_444 S
H16    O236    0.983   2_444 S
H17    O238    0.994   2_444 S
H18    O238    0.992   2_444 S
H19    O395    1.008   .     S
H20    O395    0.994   .     S
H21    O393    0.993   .     S
H22    O393    0.982   .     S
H23    O239    0.975   2_444 S
H24    O239    1.019   2_444 S
H25    O237    0.980   2_444 S
H26    O237    0.978   2_444 S
H27    O245    0.982   .     S
H28    O245    0.991   .     S
H29    O242    0.988   .     S
H30    O242    1.005   .     S
H31    O243    1.014   .     S
H32    O243    1.001   .     S
H33    O396    0.980   2_444 S
H34    O396    0.990   2_444 S
H35    O397    1.004   2_444 S
H36    O397    0.993   2_444 S
H37    O244    1.012   .     S
H38    O244    0.978   .     S
H39    O394    0.979   .     S
H40    O394    0.995   .     S
C41    O56     1.426   .     S
C41    O179    1.402   .     S
C41    C43     1.527   .     S
C41    H42     1.100   .     S
C43    O45     1.445   .     S
C43    C47     1.518   .     S
C43    H44     1.101   .     S
O45    H46     0.984   .     S
C47    O49     1.424   .     S
C47    C51     1.542   .     S
C47    H48     1.106   .     S
O49    H50     0.999   .     S
C51    O53     1.420   .     S
C51    C54     1.537   .     S
C51    H52     1.106   .     S
O53    C62     1.430   .     S
C54    O56     1.445   .     S
C54    C57     1.517   .     S
C54    H55     1.104   .     S
C57    O60     1.444   .     S
C57    H58     1.102   .     S
C57    H59     1.099   .     S
O60    H61     0.976   .     S
C62    O77     1.403   .     S
C62    C64     1.531   .     S
C62    H63     1.101   .     S
C64    O66     1.450   .     S
C64    C68     1.524   .     S
C64    H65     1.101   .     S
O66    H67     0.993   .     S
C68    O70     1.424   .     S
C68    C72     1.534   .     S
C68    H69     1.106   .     S
O70    H71     1.002   .     S
C72    O74     1.432   .     S
C72    C75     1.537   .     S
C72    H73     1.103   .     S
O74    C83     1.426   .     S
C75    O77     1.449   .     S
C75    C78     1.527   .     S
C75    H76     1.104   .     S
C78    O81     1.421   .     S
C78    H80     1.102   .     S
C78    H79     1.106   .     S
O81    H82     0.990   .     S
C83    O98     1.404   .     S
C83    C85     1.526   .     S
C83    H84     1.098   .     S
C85    O87     1.418   .     S
C85    C89     1.531   .     S
C85    H86     1.102   .     S
O87    H88     1.007   .     S
C89    O91     1.432   .     S
C89    C93     1.529   .     S
C89    H90     1.106   .     S
O91    H92     1.001   .     S
C93    O95     1.438   .     S
C93    C96     1.554   .     S
C93    H94     1.102   .     S
O95    C104    1.408   .     S
C96    O98     1.441   .     S
C96    C99     1.527   .     S
C96    H97     1.107   .     S
C99    O102    1.428   .     S
C99    H100    1.104   .     S
C99    H101    1.096   .     S
O102   H103    1.006   .     S
C104   O119    1.425   .     S
C104   C106    1.532   .     S
C104   H105    1.097   .     S
C106   O108    1.417   .     S
C106   C110    1.537   .     S
C106   H107    1.105   .     S
O108   H109    0.990   .     S
C110   O112    1.446   .     S
C110   C114    1.531   .     S
C110   H111    1.102   .     S
O112   H113    1.019   .     S
C114   O116    1.438   .     S
C114   C117    1.546   .     S
C114   H115    1.105   .     S
O116   C125    1.450   .     S
C117   O119    1.441   .     S
C117   C120    1.518   .     S
C117   H118    1.104   .     S
C120   O123    1.426   .     S
C120   H122    1.099   .     S
C120   H121    1.101   .     S
O123   H124    0.990   .     S
C125   O140    1.401   .     S
C125   C127    1.533   .     S
C125   H126    1.101   .     S
C127   O129    1.436   .     S
C127   C131    1.529   .     S
C127   H128    1.100   .     S
O129   H130    0.983   .     S
C131   O133    1.426   .     S
C131   C135    1.522   .     S
C131   H132    1.105   .     S
O133   H134    0.991   .     S
C135   O137    1.434   .     S
C135   C138    1.536   .     S
C135   H136    1.103   .     S
O137   C146    1.419   .     S
C138   O140    1.443   .     S
C138   C141    1.529   .     S
C138   H139    1.108   .     S
C141   O144    1.425   .     S
C141   H142    1.102   .     S
C141   H143    1.099   .     S
O144   H145    1.000   .     S
C146   O161    1.416   .     S
C146   C148    1.538   .     S
C146   H147    1.100   .     S
C148   O150    1.413   .     S
C148   C152    1.533   .     S
C148   H149    1.104   .     S
O150   H151    0.992   .     S
C152   O154    1.426   .     S
C152   C156    1.524   .     S
C152   H153    1.104   .     S
O154   H155    0.992   .     S
C156   O158    1.441   .     S
C156   C159    1.532   .     S
C156   H157    1.103   .     S
O158   C167    1.411   .     S
C159   O161    1.442   .     S
C159   C162    1.518   .     S
C159   H160    1.107   .     S
C162   O165    1.429   .     S
C162   H163    1.101   .     S
C162   H164    1.101   .     S
O165   H166    1.001   .     S
C167   O182    1.419   .     S
C167   C169    1.536   .     S
C167   H168    1.098   .     S
C169   O171    1.429   .     S
C169   C173    1.515   .     S
C169   H170    1.105   .     S
O171   H172    0.985   .     S
C173   O175    1.441   .     S
C173   C177    1.519   .     S
C173   H174    1.104   .     S
O175   H176    0.993   .     S
C177   O179    1.433   .     S
C177   C180    1.525   .     S
C177   H178    1.104   .     S
C180   O182    1.439   .     S
C180   C183    1.532   .     S
C180   H181    1.106   .     S
C183   O186    1.417   .     S
C183   H185    1.102   .     S
C183   H184    1.102   .     S
O186   H187    0.988   .     S
O188   C192    1.363   .     S
O188   H189    0.986   .     S
C190   C192    1.397   .     S
C190   C198    1.401   .     D
C190   H191    1.093   .     S
C192   C193    1.399   .     D
C193   C195    1.392   .     S
C193   H194    1.089   .     S
C195   C197    1.403   .     D
C195   H196    1.089   .     S
C197   C227    1.525   .     S
C197   C198    1.410   .     S
C198   C199    1.510   .     S
C199   C202    1.526   .     S
C199   H201    1.106   .     S
C199   H200    1.100   .     S
C202   C205    1.531   .     S
C202   H203    1.105   .     S
C202   H204    1.102   .     S
C205   C207    1.526   .     S
C205   C227    1.549   .     S
C205   H206    1.107   .     S
C207   C209    1.538   .     S
C207   C219    1.548   .     S
C207   H208    1.111   .     S
C209   C212    1.550   .     S
C209   H210    1.097   .     S
C209   H211    1.102   .     S
C212   C215    1.558   .     S
C212   H214    1.099   .     S
C212   H213    1.101   .     S
C215   O217    1.430   .     S
C215   C219    1.552   .     S
C215   H216    1.102   .     S
O217   H218    0.973   .     S
C219   C224    1.533   .     S
C219   C220    1.542   .     S
C220   H223    1.097   .     S
C220   H222    1.101   .     S
C220   H221    1.100   .     S
C224   C229    1.539   .     S
C224   H226    1.103   .     S
C224   H225    1.105   .     S
C227   C229    1.541   .     S
C227   H228    1.111   .     S
C229   H230    1.103   .     S
C229   H231    1.101   .     S
O232   H5      0.980   2_444 S
O232   H6      1.005   2_444 S
O233   H7      1.000   2_444 S
O233   H8      0.998   2_444 S
O234   H3      0.988   2_444 S
O234   H4      1.002   2_444 S
O236   H15     1.014   2_444 S
O236   H16     0.983   2_444 S
O237   H25     0.980   2_444 S
O237   H26     0.978   2_444 S
O238   H17     0.994   2_444 S
O238   H18     0.992   2_444 S
O239   H23     0.975   2_444 S
O239   H24     1.019   2_444 S
O240   H9      0.985   2_444 S
O240   H10     0.996   2_444 S
O241   H13     0.979   2_444 S
O241   H14     0.990   2_444 S
C246   O261    1.432   .     S
C246   O384    1.410   .     S
C246   C248    1.527   .     S
C246   H247    1.100   .     S
C248   O250    1.429   .     S
C248   C252    1.524   .     S
C248   H249    1.103   .     S
O250   H251    0.979   .     S
C252   O254    1.429   .     S
C252   C256    1.537   .     S
C252   H253    1.105   .     S
O254   H255    1.013   .     S
C256   O258    1.432   .     S
C256   C259    1.536   .     S
C256   H257    1.107   .     S
O258   C267    1.428   .     S
C259   O261    1.445   .     S
C259   C262    1.525   .     S
C259   H260    1.105   .     S
C262   O265    1.431   .     S
C262   H263    1.103   .     S
C262   H264    1.102   .     S
O265   H266    0.972   .     S
C267   O282    1.412   .     S
C267   C269    1.534   .     S
C267   H268    1.099   .     S
C269   O271    1.428   .     S
C269   C273    1.526   .     S
C269   H270    1.103   .     S
O271   H272    0.993   .     S
C273   O275    1.424   .     S
C273   C277    1.527   .     S
C273   H274    1.107   .     S
O275   H276    1.001   .     S
C277   O279    1.431   .     S
C277   C280    1.538   .     S
C277   H278    1.103   .     S
O279   C288    1.430   .     S
C280   O282    1.446   .     S
C280   C283    1.527   .     S
C280   H281    1.106   .     S
C283   O286    1.421   .     S
C283   H285    1.102   .     S
C283   H284    1.107   .     S
O286   H287    0.991   .     S
C288   O303    1.405   .     S
C288   C290    1.529   .     S
C288   H289    1.098   .     S
C290   O292    1.418   .     S
C290   C294    1.530   .     S
C290   H291    1.103   .     S
O292   H293    1.009   .     S
C294   O296    1.428   .     S
C294   C298    1.524   .     S
C294   H295    1.104   .     S
O296   H297    1.003   .     S
C298   O300    1.432   .     S
C298   C301    1.552   .     S
C298   H299    1.103   .     S
O300   C309    1.414   .     S
C301   O303    1.442   .     S
C301   C304    1.526   .     S
C301   H302    1.108   .     S
C304   O307    1.427   .     S
C304   H305    1.104   .     S
C304   H306    1.094   .     S
O307   H308    1.008   .     S
C309   O324    1.415   .     S
C309   C311    1.525   .     S
C309   H310    1.098   .     S
C311   O313    1.420   .     S
C311   C315    1.530   .     S
C311   H312    1.105   .     S
O313   H314    0.995   .     S
C315   O317    1.446   .     S
C315   C319    1.524   .     S
C315   H316    1.103   .     S
O317   H318    0.989   .     S
C319   O321    1.438   .     S
C319   C322    1.545   .     S
C319   H320    1.103   .     S
O321   C330    1.423   .     S
C322   O324    1.434   .     S
C322   C325    1.528   .     S
C322   H323    1.108   .     S
C325   O328    1.426   .     S
C325   H327    1.099   .     S
C325   H326    1.102   .     S
O328   H329    1.000   .     S
C330   O345    1.414   .     S
C330   C332    1.526   .     S
C330   H331    1.102   .     S
C332   O334    1.434   .     S
C332   C336    1.529   .     S
C332   H333    1.100   .     S
O334   H335    0.984   .     S
C336   O338    1.440   .     S
C336   C340    1.520   .     S
C336   H337    1.104   .     S
O338   H339    0.994   .     S
C340   O342    1.443   .     S
C340   C343    1.547   .     S
C340   H341    1.102   .     S
O342   C351    1.427   .     S
C343   O345    1.457   .     S
C343   C346    1.524   .     S
C343   H344    1.105   .     S
C346   O349    1.432   .     S
C346   H347    1.101   .     S
C346   H348    1.097   .     S
O349   H350    0.996   .     S
C351   O366    1.404   .     S
C351   C353    1.534   .     S
C351   H352    1.102   .     S
C353   O355    1.430   .     S
C353   C357    1.533   .     S
C353   H354    1.102   .     S
O355   H356    0.981   .     S
C357   O359    1.428   .     S
C357   C361    1.526   .     S
C357   H358    1.105   .     S
O359   H360    0.993   .     S
C361   O363    1.440   .     S
C361   C364    1.530   .     S
C361   H362    1.102   .     S
O363   C372    1.417   .     S
C364   O366    1.445   .     S
C364   C367    1.521   .     S
C364   H365    1.105   .     S
C367   O370    1.428   .     S
C367   H368    1.101   .     S
C367   H369    1.101   .     S
O370   H371    0.995   .     S
C372   O387    1.423   .     S
C372   C374    1.530   .     S
C372   H373    1.099   .     S
C374   O376    1.430   .     S
C374   C378    1.524   .     S
C374   H375    1.102   .     S
O376   H377    0.987   .     S
C378   O380    1.437   .     S
C378   C382    1.533   .     S
C378   H379    1.104   .     S
O380   H381    0.996   .     S
C382   O384    1.437   .     S
C382   C385    1.529   .     S
C382   H383    1.102   .     S
C385   O387    1.441   .     S
C385   C388    1.531   .     S
C385   H386    1.106   .     S
C388   O391    1.419   .     S
C388   H390    1.101   .     S
C388   H389    1.106   .     S
O391   H392    0.990   .     S
O396   H33     0.980   2_444 S
O396   H34     0.990   2_444 S
O397   H35     1.004   2_444 S
O397   H36     0.993   2_444 S
O399   H403    0.986   .     S
O399   H404    0.991   .     S
O400   H401    0.999   .     S
O400   H402    0.978   .     S
