# Supplementary material for: 17-β-Estradiol—β-Cyclodextrin Complex as Solid: Synthesis, Structural and Physicochemical Characterization
Source: Molecules. 2023 Apr 26;28(9):3747. doi: 10.3390/molecules28093747 (PMC10180119; doi:10.3390/molecules28093747)
Supplement: Supplementary file 1 [file molecules-28-03747-s001.zip › estradiol_beta-CD.cif]

#\#CIF_1.1
 
#  CIF produced by WinGX routine CIF_UPDATE
#  Created on 2023-02-02 at 17:00:07
#  Using CIFtbx version 3.0.4  1 Sep 2006
 
#  Dictionary name : cif_core.dic
#  Dictionary vers : 2.4.3
#  Request file    : c:\wingx\files\archive.reqdat
#  CIF files read  : cu_2022kbperst_0m project sadabs
 
#------------------ SECTION 1. GLOBAL INFORMATION ---------------------------#
 
data_global
 
#------------------ AUDIT DETAILS -------------------------------------------#
 
_audit_creation_date            2023-02-02
_audit_creation_method          'WinGX routine CIF_UPDATE'
_audit_conform_dict_name        cif_core.dic
_audit_conform_dict_version     2.4
_audit_conform_dict_location    ftp://ftp.iucr.org/pub/cif_core.dic
_audit_update_record            ?
 
#==============================================================================
#
# SUBMISSION DETAILS
# Name and address of author for correspondence
 
_publ_contact_author_name       'Bethanis, Kostas'
_publ_contact_author_address
;
 
;
_publ_contact_author_email       'kbeth@aua.gr'
_publ_contact_author_fax         ' '
_publ_contact_author_phone       ' '
 
 
_publ_contact_letter
;
 Submission dated :2023-02-02
 
Please consider this CIF for submission to the Cambridge Crystallographic
Data Centre. I certify that all authors have seen and approved of this
submission, that all have made significant scientific contributions to the
work reported, and that all share responsibility and accountability for
the results.
 
This CIF  is submitted as a personal communication
 
This CIF is submitted as part of a journal submission
<Insert Journal details here>
 
<Insert NAME here>
;
 
 
#==============================================================================
#
# TITLE AND AUTHOR LIST
 
_publ_section_title
; ?
;
_publ_section_title_footnote
; ?
;
 
# The loop structure below should contain the names and addresses of all
# authors, in the required order of publication. Repeat as necessary.
 
loop_
 _publ_author_name
 _publ_author_footnote
 _publ_author_address
?
?
;?
;
 
#------------------  SECTION 2. COMPOUND(S) DETAILS -------------------------#
 
data_cu_2022kbperst_0m
 
_audit_creation_date                    2023-02-02T17:00:07-00:00
_audit_creation_method                  'WinGX routine CIF_UPDATE'
 
#----------------------------------------------------------------------------#
#                   CHEMICAL INFORMATION                                     #
#----------------------------------------------------------------------------#
 
_chemical_formula_moiety                'C51 H82 O46.5'
_chemical_formula_sum                   'C51 H82 O46.50'
_chemical_formula_weight                1439.16
_chemical_compound_source               'as described'
_chemical_absolute_configuration        rmad
 
#----------------------------------------------------------------------------#
#                   UNIT CELL INFORMATION                                    #
#----------------------------------------------------------------------------#
 
_symmetry_cell_setting                  monoclinic
_symmetry_space_group_name_H-M          'C 2'
_symmetry_space_group_name_Hall         'C 2y'
_symmetry_Int_Tables_number             5
loop_
    _symmetry_equiv_pos_as_xyz
'x, y, z'
'-x, y, -z'
'x+1/2, y+1/2, z'
'-x+1/2, y+1/2, -z'
 
_cell_length_a                          19.1245(15)
_cell_length_b                          24.4180(18)
_cell_length_c                          15.6004(11)
_cell_angle_alpha                       90
_cell_angle_beta                        109.500(5)
_cell_angle_gamma                       90
_cell_volume                            6867.2(9)
_cell_formula_units_Z                   4
_cell_measurement_temperature           100(2)
_cell_measurement_reflns_used           9073
_cell_measurement_theta_min             3.05
_cell_measurement_theta_max             74.25
_cell_measurement_wavelength            1.54184
 
#----------------------------------------------------------------------------#
#                   CRYSTAL INFORMATION                                      #
#----------------------------------------------------------------------------#
 
_exptl_crystal_description              prism
_exptl_crystal_colour                   colourless
_exptl_crystal_size_max                 0.4
_exptl_crystal_size_mid                 0.27
_exptl_crystal_size_min                 0.13
_exptl_crystal_density_diffrn           1.392
_exptl_crystal_density_method           'not measured'
_exptl_crystal_F_000                    3040
 
#----------------------------------------------------------------------------#
#                   ABSORPTION CORRECTION                                    #
#----------------------------------------------------------------------------#
 
_exptl_absorpt_coefficient_mu           1.094
_exptl_absorpt_correction_type          multi-scan
_exptl_absorpt_process_details
;
SADABS-2016/2 - Bruker AXS area detector scaling and absorption correction
;
_exptl_absorpt_correction_T_min         0.593
_exptl_absorpt_correction_T_max         0.754
_shelx_estimated_absorpt_T_min          0.669
_shelx_estimated_absorpt_T_max          0.871
 
#----------------------------------------------------------------------------#
#                   DATA COLLECTION                                          #
#----------------------------------------------------------------------------#
 
_diffrn_source                          'sealed x-ray tube'
_diffrn_ambient_temperature             100(2)
_diffrn_radiation_wavelength            1.54178
_diffrn_radiation_type                  CuK\a
_diffrn_radiation_monochromator         graphite
_diffrn_radiation_probe                 x-ray
_diffrn_detector                        'APEX-II CCD'
_diffrn_orient_matrix_ub_11             -0.023623
_diffrn_orient_matrix_ub_12             0.009032
_diffrn_orient_matrix_ub_13             -0.065915
_diffrn_orient_matrix_ub_21             0.042056
_diffrn_orient_matrix_ub_22             -0.018115
_diffrn_orient_matrix_ub_23             -0.013502
_diffrn_orient_matrix_ub_31             -0.027391
_diffrn_orient_matrix_ub_32             -0.035602
_diffrn_orient_matrix_ub_33             -0.009852
_diffrn_measurement_device              '\k-geometry diffractometer'
_diffrn_measurement_device_type         'Bruker APEX-II'
_diffrn_measurement_method              '\f or \w oscillation scans'
_diffrn_standards_number                0
_diffrn_standards_interval_time         .
_diffrn_standards_interval_count        .
_diffrn_standards_decay_%               ?
_diffrn_reflns_av_R_equivalents         0.0737
_diffrn_reflns_av_unetI/netI            0.0373
_diffrn_reflns_number                   105516
_diffrn_reflns_limit_h_min              -22
_diffrn_reflns_limit_h_max              22
_diffrn_reflns_limit_k_min              -29
_diffrn_reflns_limit_k_max              29
_diffrn_reflns_limit_l_min              -18
_diffrn_reflns_limit_l_max              18
_diffrn_reflns_theta_min                3.005
_diffrn_reflns_theta_max                66.595
_diffrn_reflns_theta_full               66.595
_diffrn_measured_fraction_theta_full
                                        0.997
_diffrn_measured_fraction_theta_max
                                        0.997
_diffrn_reflns_Laue_measured_fraction_full
                                        0.997
_diffrn_reflns_Laue_measured_fraction_max
                                        0.997
_diffrn_reflns_point_group_measured_fraction_full
                                        0.984
_diffrn_reflns_point_group_measured_fraction_max
                                        0.984
_reflns_Friedel_fraction_full           0.969
_reflns_Friedel_fraction_max            0.969
_reflns_Friedel_coverage                0.923
_reflns_number_total                    11945
_reflns_number_gt                       10450
_reflns_threshold_expression            'I > 2\s(I)'
_diffrn_reflns_reduction_process
;
        Scaled and merged with Sortav
        R.H. Blessing, (1987) Cryst. Rev. 1, 3-58
        R.H. Blessing, (1989) J. Appl. Cryst. 22, 396-397
;
 
#----------------------------------------------------------------------------#
#                   COMPUTER PROGRAMS USED                                   #
#----------------------------------------------------------------------------#
 
_computing_data_collection              'Bruker APEX2 software'
_computing_cell_refinement              'SAINT V8.40B integration software'
_computing_data_reduction               'SORTAV (Blessing, 1995)'
_computing_structure_solution           'SHELXS-2013 (Sheldrick, 2008)'
_computing_structure_refinement         'SHELXL-2018/3 (Sheldrick, 2018)'
_computing_molecular_graphics           'MERCURY (Macrae et al., 2006)'
_computing_publication_material
                                   'WinGX publication routines (Farrugia, 2012)'
 
#----------------------------------------------------------------------------#
#                   STRUCTURE SOLUTION                                       #
#----------------------------------------------------------------------------#
 
_atom_sites_solution_hydrogens          geom
 
#----------------------------------------------------------------------------#
#                   REFINEMENT INFORMATION                                   #
#----------------------------------------------------------------------------#
 
_refine_ls_structure_factor_coef        Fsqd
_refine_ls_matrix_type                  full
_refine_ls_weighting_scheme             calc
_refine_ls_weighting_details
             'w=1/[\s^2^(Fo^2^)+(0.1769P)^2^+15.8528P] where P=(Fo^2^+2Fc^2^)/3'
_refine_ls_hydrogen_treatment           constr
_refine_ls_extinction_method            none
_refine_ls_number_reflns                11945
_refine_ls_number_parameters            950
_refine_ls_number_restraints            202
_refine_ls_number_constraints           0
_refine_ls_R_factor_all                 0.104
_refine_ls_R_factor_gt                  0.0952
_refine_ls_wR_factor_ref                0.2688
_refine_ls_wR_factor_gt                 0.2591
_refine_ls_goodness_of_fit_ref          1.038
_refine_ls_restrained_S_all             1.042
_refine_ls_shift/su_max                 0
_refine_ls_shift/su_mean                0
_refine_ls_abs_structure_details
;
 Flack x determined using 4239 quotients [(I+)-(I-)]/[(I+)+(I-)]
 (Parsons, Flack and Wagner, Acta Cryst. B69 (2013) 249-259).
;
_refine_ls_abs_structure_Flack          0.03(17)
_refine_diff_density_max                0.775
_refine_diff_density_min                -0.439
_refine_diff_density_rms                0.089
 
#----------------------------------------------------------------------------#
#                   CONSTRAINTS AND RESTRAINTS                               #
#----------------------------------------------------------------------------#
 
 
#----------------------------------------------------------------------------#
#                   ATOMIC TYPES, COORDINATES AND THERMAL PARAMETERS         #
#----------------------------------------------------------------------------#
 
loop_
    _atom_type_symbol
    _atom_type_description
    _atom_type_scat_dispersion_real
    _atom_type_scat_dispersion_imag
    _atom_type_scat_source
C C 0.0181 0.0091 'International Tables Vol C Tables 4.2.6.8 and 6.1.1.4'
H H 0 0 'International Tables Vol C Tables 4.2.6.8 and 6.1.1.4'
O O 0.0492 0.0322 'International Tables Vol C Tables 4.2.6.8 and 6.1.1.4'
 
loop_
    _atom_site_label
    _atom_site_type_symbol
    _atom_site_fract_x
    _atom_site_fract_y
    _atom_site_fract_z
    _atom_site_U_iso_or_equiv
    _atom_site_adp_type
    _atom_site_occupancy
    _atom_site_site_symmetry_order
    _atom_site_calc_flag
    _atom_site_refinement_flags_posn
    _atom_site_refinement_flags_adp
    _atom_site_refinement_flags_occupancy
    _atom_site_disorder_assembly
    _atom_site_disorder_group
C11_1 C 0.7994(5) 0.4893(3) 0.8207(7) 0.056(2) Uani 1 1 d . . . . .
H11_1 H 0.83654 0.460605 0.820244 0.067 Uiso 1 1 calc R U . . .
C21_1 C 0.8301(5) 0.5228(3) 0.9064(6) 0.0509(19) Uani 1 1 d . . . . .
H21_1 H 0.877858 0.539515 0.906456 0.061 Uiso 1 1 calc R U . . .
O21_1 O 0.8453(4) 0.4900(2) 0.9845(5) 0.0583(15) Uani 1 1 d . . . . .
H21A_1 H 0.885347 0.500127 1.023385 0.087 Uiso 1 1 calc R U . . .
C31_1 C 0.7774(5) 0.5689(3) 0.9075(5) 0.0427(17) Uani 1 1 d . . . . .
H31_1 H 0.730215 0.552846 0.910563 0.051 Uiso 1 1 calc R U . . .
O31_1 O 0.8091(3) 0.6030(2) 0.9849(4) 0.0481(13) Uani 1 1 d . . . . .
H31A_1 H 0.78161 0.630331 0.981701 0.072 Uiso 1 1 calc R U . . .
C41_1 C 0.7606(5) 0.6017(3) 0.8208(6) 0.0470(19) Uani 1 1 d . . . . .
H41_1 H 0.805928 0.622227 0.821012 0.056 Uiso 1 1 calc R U . . .
O41_1 O 0.7030(3) 0.6397(2) 0.8195(4) 0.0431(12) Uani 1 1 d . . . . .
C51_1 C 0.7332(7) 0.5655(4) 0.7356(6) 0.060(2) Uani 1 1 d . . . . .
H51_1 H 0.684644 0.54886 0.732631 0.072 Uiso 1 1 calc R U . . .
O51_1 O 0.7859(5) 0.5220(3) 0.7430(5) 0.0680(19) Uani 1 1 d . . . . .
C61_1 C 0.7226(10) 0.5966(5) 0.6505(7) 0.088(4) Uani 1 1 d . . . . .
H61A_1 H 0.688522 0.627619 0.64778 0.106 Uiso 1 1 calc R U . . .
H61B_1 H 0.770885 0.612118 0.652377 0.106 Uiso 1 1 calc R U . . .
O61_1 O 0.6936(12) 0.5651(7) 0.5704(9) 0.164(6) Uani 1 1 d . . . . .
H61_1 H 0.727718 0.557677 0.549536 0.247 Uiso 1 1 calc R U . . .
C12_1 C 0.7166(5) 0.6968(3) 0.8140(5) 0.0440(17) Uani 1 1 d . . . . .
H12_1 H 0.770178 0.702512 0.821976 0.053 Uiso 1 1 calc R U . . .
C22_1 C 0.6989(5) 0.7250(3) 0.8889(5) 0.0430(16) Uani 1 1 d . . . . .
H22_1 H 0.707606 0.765093 0.884457 0.052 Uiso 1 1 calc R U . . .
O22_1 O 0.7460(3) 0.7063(2) 0.9750(4) 0.0459(12) Uani 1 1 d . . . . .
H22A_1 H 0.759563 0.733119 1.010501 0.069 Uiso 1 1 calc R U . . .
C32_1 C 0.6183(5) 0.7166(3) 0.8781(5) 0.0417(16) Uani 1 1 d . . . . .
H32_1 H 0.608862 0.676658 0.883121 0.05 Uiso 1 1 calc R U . . .
O32_1 O 0.6001(3) 0.7454(3) 0.9472(4) 0.0512(13) Uani 1 1 d . . . . .
H32A_1 H 0.553779 0.746537 0.933964 0.077 Uiso 1 1 calc R U . . .
C42_1 C 0.5710(4) 0.7368(3) 0.7847(5) 0.0428(17) Uani 1 1 d . . . . .
H42_1 H 0.575131 0.777506 0.781717 0.051 Uiso 1 1 calc R U . . .
O42_1 O 0.4958(3) 0.7220(2) 0.7715(4) 0.0447(12) Uani 1 1 d . . . . .
C52_1 C 0.5940(5) 0.7104(4) 0.7098(5) 0.0469(17) Uani 1 1 d . . . . .
H52_1 H 0.582223 0.670403 0.706664 0.056 Uiso 1 1 calc R U . . .
O52_1 O 0.6727(3) 0.7177(2) 0.7285(4) 0.0479(13) Uani 1 1 d . . . . .
C62_1 C 0.5569(5) 0.7362(4) 0.6170(5) 0.054(2) Uani 1 1 d . . . . .
H62A_1 H 0.576971 0.719324 0.572366 0.065 Uiso 1 1 calc R U . . .
H62B_1 H 0.502971 0.728704 0.596893 0.065 Uiso 1 1 calc R U . . .
O62_1 O 0.5685(4) 0.7939(3) 0.6185(4) 0.0613(16) Uani 1 1 d . . . . .
H62_1 H 0.608967 0.800541 0.61035 0.092 Uiso 1 1 calc R U . . .
C13_1 C 0.4425(5) 0.7641(3) 0.7415(5) 0.0477(18) Uani 1 1 d . . . . .
H13_1 H 0.468015 0.799281 0.737586 0.057 Uiso 1 1 calc R U . . .
C23_1 C 0.4021(4) 0.7703(3) 0.8108(5) 0.0453(17) Uani 1 1 d . . . . .
H23_1 H 0.367641 0.802311 0.792962 0.054 Uiso 1 1 calc R U . . .
O23_1 O 0.4546(3) 0.7804(2) 0.8973(4) 0.0514(13) Uani 1 1 d . . . . .
H23A_1 H 0.446857 0.811471 0.915537 0.077 Uiso 1 1 calc R U . . .
C33_1 C 0.3568(5) 0.7191(3) 0.8117(5) 0.0439(17) Uani 1 1 d . . . . .
H33_1 H 0.391332 0.687276 0.832018 0.053 Uiso 1 1 calc R U . . .
O33_1 O 0.3158(3) 0.7254(3) 0.8727(4) 0.0487(13) Uani 1 1 d . . . . .
H33A_1 H 0.343847 0.719738 0.926235 0.073 Uiso 1 1 calc R U . . .
C43_1 C 0.3047(5) 0.7080(3) 0.7173(5) 0.0450(17) Uani 1 1 d . . . . .
H43_1 H 0.268952 0.73914 0.696906 0.054 Uiso 1 1 calc R U . . .
O43_1 O 0.2650(3) 0.6588(2) 0.7189(4) 0.0448(12) Uani 1 1 d . . . . .
C53_1 C 0.3489(6) 0.7018(4) 0.6519(6) 0.056(2) Uani 1 1 d . . . . .
H53_1 H 0.384286 0.670517 0.67347 0.067 Uiso 1 1 calc R U . . .
O53_1 O 0.3914(4) 0.7508(3) 0.6544(4) 0.0589(16) Uani 1 1 d . . . . .
C63_1 C 0.3041(8) 0.6919(6) 0.5553(7) 0.086(4) Uani 1 1 d . . . . .
H63A_1 H 0.337736 0.686576 0.519632 0.104 Uiso 1 1 calc R U . . .
H63B_1 H 0.274925 0.65787 0.550855 0.104 Uiso 1 1 calc R U . . .
O63_1 O 0.2557(7) 0.7354(5) 0.5179(7) 0.122(4) Uani 1 1 d . . . . .
H63_1 H 0.212864 0.723062 0.49158 0.183 Uiso 1 1 calc R U . . .
C14_1 C 0.1887(5) 0.6594(3) 0.6835(6) 0.051(2) Uani 1 1 d . . . . .
H14_1 H 0.17162 0.697989 0.667954 0.061 Uiso 1 1 calc R U . . .
C24_1 C 0.1572(6) 0.6379(3) 0.7554(6) 0.053(2) Uani 1 1 d . . . . .
H24_1 H 0.101776 0.638828 0.729479 0.064 Uiso 1 1 calc R U . . .
O24_1 O 0.1801(4) 0.6719(2) 0.8331(4) 0.0529(14) Uani 1 1 d . . . . .
H24A_1 H 0.145919 0.674119 0.855516 0.079 Uiso 1 1 calc R U . . .
C34_1 C 0.1818(6) 0.5787(3) 0.7774(5) 0.0498(19) Uani 1 1 d . . . . .
H34_1 H 0.237077 0.577263 0.804245 0.06 Uiso 1 1 calc R U . . .
O34_1 O 0.1502(4) 0.5563(2) 0.8406(4) 0.0546(14) Uani 1 1 d . . . . .
H34A_1 H 0.103818 0.559284 0.819541 0.082 Uiso 1 1 calc R U . . .
C44_1 C 0.1568(6) 0.5455(3) 0.6913(6) 0.053(2) Uani 1 1 d D . . . .
H44_1 H 0.101427 0.543363 0.667952 0.064 Uiso 1 1 calc R U . . .
O44_1 O 0.1872(4) 0.4917(2) 0.7122(4) 0.0542(15) Uani 1 1 d . . . . .
C54_1 C 0.1843(7) 0.5704(4) 0.6184(6) 0.062(2) Uani 1 1 d D . . . .
H54_1 H 0.239597 0.571148 0.645911 0.075 Uiso 1 1 calc R U . A 1
O54_1 O 0.1621(4) 0.6269(2) 0.6043(4) 0.0589(16) Uani 1 1 d D . . . .
C64A_1 C 0.1686(9) 0.5405(6) 0.5322(9) 0.040(3) Uiso 0.5 1 d D . P B 1
H64A_1 H 0.191567 0.558924 0.491766 0.048 Uiso 0.5 1 calc R U P B 1
H64B_1 H 0.187314 0.502407 0.543161 0.048 Uiso 0.5 1 calc R U P B 1
O64A_1 O 0.0884(8) 0.5414(6) 0.4932(9) 0.058(3) Uiso 0.5 1 d D . P B 1
H64C_1 H 0.073077 0.573577 0.493642 0.087 Uiso 0.5 1 calc R U P B 1
C64B_1 C 0.1304(14) 0.5421(8) 0.5227(12) 0.060(5) Uiso 0.5 1 d D . P B 2
H64D_1 H 0.129341 0.50178 0.528494 0.072 Uiso 0.5 1 calc R U P B 2
H64E_1 H 0.079137 0.556393 0.505556 0.072 Uiso 0.5 1 calc R U P B 2
O64B_1 O 0.1647(13) 0.5579(11) 0.4571(15) 0.121(7) Uiso 0.5 1 d D . P B 2
H64F_1 H 0.136882 0.549138 0.404741 0.182 Uiso 0.5 1 calc R U P B 2
C15_1 C 0.1392(6) 0.4453(3) 0.6894(6) 0.054(2) Uani 1 1 d . . . . .
H15_1 H 0.086494 0.457791 0.672441 0.064 Uiso 1 1 calc R U . . .
C25_1 C 0.1580(6) 0.4103(3) 0.7728(5) 0.053(2) Uani 1 1 d . . . . .
H25_1 H 0.124778 0.37748 0.758358 0.063 Uiso 1 1 calc R U . . .
O25_1 O 0.1455(4) 0.4391(2) 0.8460(4) 0.0600(16) Uani 1 1 d . . . . .
H25A_1 H 0.146309 0.47296 0.83705 0.09 Uiso 1 1 calc R U . . .
C35_1 C 0.2363(6) 0.3910(3) 0.7989(5) 0.0490(19) Uani 1 1 d . . . . .
H35_1 H 0.27015 0.423348 0.815309 0.059 Uiso 1 1 calc R U . . .
O35_1 O 0.2546(4) 0.3544(2) 0.8743(4) 0.0513(14) Uani 1 1 d . . . . .
H35A_1 H 0.292806 0.3366 0.876866 0.077 Uiso 1 1 calc R U . . .
C45_1 C 0.2473(5) 0.3616(3) 0.7180(5) 0.0481(18) Uani 1 1 d . . . . .
H45_1 H 0.217857 0.32691 0.705952 0.058 Uiso 1 1 calc R U . . .
O45_1 O 0.3242(3) 0.3487(2) 0.7423(3) 0.0507(13) Uani 1 1 d . . . . .
C55_1 C 0.2221(5) 0.3972(3) 0.6339(5) 0.0472(18) Uani 1 1 d . . . . .
H55_1 H 0.256177 0.429401 0.643003 0.057 Uiso 1 1 calc R U . . .
O55_1 O 0.1490(4) 0.4164(2) 0.6158(4) 0.0530(14) Uani 1 1 d . . . . .
C65_1 C 0.2216(6) 0.3660(4) 0.5473(5) 0.056(2) Uani 1 1 d . . . . .
H65A_1 H 0.206075 0.390981 0.494244 0.068 Uiso 1 1 calc R U . . .
H65B_1 H 0.272199 0.352588 0.554842 0.068 Uiso 1 1 calc R U . . .
O65_1 O 0.1720(4) 0.3213(2) 0.5322(4) 0.0568(15) Uani 1 1 d . . . . .
H65_1 H 0.190907 0.293824 0.5159 0.085 Uiso 1 1 calc R U . . .
C16_1 C 0.3446(5) 0.2957(4) 0.7270(5) 0.054(2) Uani 1 1 d . . . . .
H16_1 H 0.299288 0.272009 0.709372 0.065 Uiso 1 1 calc R U . . .
C26_1 C 0.3988(5) 0.2744(3) 0.8160(5) 0.0465(18) Uani 1 1 d . . . . .
H26_1 H 0.410521 0.235343 0.806682 0.056 Uiso 1 1 calc R U . . .
O26_1 O 0.3648(3) 0.2757(2) 0.8850(3) 0.0460(12) Uani 1 1 d . . . . .
H26A_1 H 0.377521 0.247841 0.91816 0.069 Uiso 1 1 calc R U . . .
C36_1 C 0.4699(5) 0.3065(4) 0.8423(5) 0.0468(18) Uani 1 1 d . . . . .
H36_1 H 0.4599 0.345669 0.85275 0.056 Uiso 1 1 calc R U . . .
O36_1 O 0.5217(3) 0.2840(3) 0.9231(3) 0.0513(13) Uani 1 1 d . . . . .
H36A_1 H 0.530658 0.251299 0.913735 0.077 Uiso 1 1 calc R U . . .
C46_1 C 0.5005(5) 0.3025(4) 0.7648(5) 0.053(2) Uani 1 1 d D . . . .
H46_1 H 0.51353 0.263565 0.756724 0.064 Uiso 1 1 calc DR U . . .
O46_1 O 0.5664(3) 0.3362(2) 0.7882(4) 0.0505(13) Uani 1 1 d . . . . .
C56_1 C 0.4447(6) 0.3235(6) 0.6778(6) 0.079(3) Uani 1 1 d D . . . .
H56_1 H 0.435648 0.363485 0.683033 0.095 Uiso 1 1 calc R U . . .
O56_1 O 0.3760(4) 0.2930(4) 0.6586(4) 0.073(2) Uani 1 1 d D . . . .
C66_1 C 0.4697(7) 0.3118(7) 0.5897(9) 0.094(4) Uani 1 1 d D . . . .
H66A_1 H 0.42763 0.31966 0.533624 0.113 Uiso 1 1 calc R U . . .
H66B_1 H 0.511071 0.336531 0.591187 0.113 Uiso 1 1 calc R U . . .
O66_1 O 0.4922(9) 0.2573(6) 0.5879(9) 0.137(5) Uani 1 1 d D . . . .
H66_1 H 0.475222 0.238089 0.621108 0.205 Uiso 1 1 calc R U . . .
C17_1 C 0.6314(5) 0.3119(3) 0.7832(5) 0.0484(18) Uani 1 1 d . . . . .
H17_1 H 0.622754 0.271731 0.772459 0.058 Uiso 1 1 calc DR U . . .
C27_1 C 0.6917(5) 0.3205(3) 0.8733(5) 0.0434(17) Uani 1 1 d . . . . .
H27_1 H 0.737646 0.302081 0.870868 0.052 Uiso 1 1 calc R U . . .
O27_1 O 0.6719(3) 0.2964(2) 0.9457(4) 0.0491(13) Uani 1 1 d . . . . .
H27A_1 H 0.625494 0.294525 0.930567 0.074 Uiso 1 1 calc R U . . .
C37_1 C 0.7084(4) 0.3821(3) 0.8903(5) 0.0416(16) Uani 1 1 d . . . . .
H37_1 H 0.663235 0.401013 0.894453 0.05 Uiso 1 1 calc R U . . .
O37_1 O 0.7670(3) 0.3905(2) 0.9705(4) 0.0468(12) Uani 1 1 d . . . . .
H37A_1 H 0.80699 0.382099 0.962598 0.07 Uiso 1 1 calc R U . . .
C47_1 C 0.7268(5) 0.4050(3) 0.8099(6) 0.0463(18) Uani 1 1 d . . . . .
H47_1 H 0.77525 0.389512 0.810073 0.056 Uiso 1 1 calc R U . . .
O47_1 O 0.7341(3) 0.4632(2) 0.8235(4) 0.0505(14) Uani 1 1 d . . . . .
C57_1 C 0.6669(6) 0.3920(4) 0.7189(6) 0.057(2) Uani 1 1 d . . . . .
H57_1 H 0.62058 0.412617 0.714149 0.069 Uiso 1 1 calc R U . . .
O57_1 O 0.6516(4) 0.3346(3) 0.7114(4) 0.0605(16) Uani 1 1 d . . . . .
C67_1 C 0.6921(7) 0.4066(6) 0.6375(7) 0.088(4) Uani 1 1 d D . . . .
H67A_1 H 0.651626 0.399443 0.579528 0.105 Uiso 1 1 calc R U . C 1
H67B_1 H 0.705873 0.445763 0.639625 0.105 Uiso 1 1 calc R U . C 1
O67A_1 O 0.7551(8) 0.3726(7) 0.6445(10) 0.108(6) Uani 0.6 1 d D . P D 1
H67C_1 H 0.79408 0.391285 0.66461 0.162 Uiso 0.6 1 calc R U P D 1
O67B_1 O 0.6310(11) 0.4042(12) 0.5521(10) 0.097(8) Uani 0.4 1 d D . P D 2
H67D_1 H 0.626836 0.372165 0.531507 0.146 Uiso 0.4 1 calc R U P D 2
C11_2 C 0.474(3) 0.4540(16) 1.071(3) 0.086(13) Uiso 0.25 1 d D U P E -1
H11A_2 H 0.522996 0.454263 1.11882 0.13 Uiso 0.25 1 calc R U P E -1
H11B_2 H 0.439923 0.431415 1.090202 0.13 Uiso 0.25 1 calc R U P E -1
H11C_2 H 0.479133 0.438941 1.01497 0.13 Uiso 0.25 1 calc R U P E -1
C1_2 C 0.4446(19) 0.5124(15) 1.054(2) 0.103(16) Uiso 0.25 1 d D U P E -1
C6_2 C 0.3696(19) 0.512(2) 0.980(2) 0.092(15) Uiso 0.25 1 d D U P E -1
H6A_2 H 0.346642 0.54897 0.975717 0.11 Uiso 0.25 1 calc R U P E -1
H6B_2 H 0.336806 0.485439 0.995023 0.11 Uiso 0.25 1 calc R U P E -1
C8_2 C 0.378(3) 0.498(3) 0.889(3) 0.083(19) Uiso 0.25 1 d D U P E -1
H8A_2 H 0.396453 0.459532 0.892419 0.1 Uiso 0.25 1 calc R U P E -1
H8B_2 H 0.327949 0.498427 0.841636 0.1 Uiso 0.25 1 calc R U P E -1
C4_2 C 0.4289(17) 0.5348(17) 0.8601(19) 0.070(10) Uiso 0.25 1 d D U P E -1
H4_2 H 0.407322 0.572384 0.856942 0.084 Uiso 0.25 1 calc R U P E -1
C12_2 C 0.4343(19) 0.5255(16) 0.776(2) 0.098(18) Uiso 0.25 1 d D U P E -1
C15_2 C 0.373(2) 0.505(2) 0.705(3) 0.12(2) Uiso 0.25 1 d D U P E -1
H15_2 H 0.328476 0.49735 0.71663 0.145 Uiso 0.25 1 calc R U P E -1
C17_2 C 0.377(3) 0.497(3) 0.619(3) 0.16(3) Uiso 0.25 1 d D U P E -1
H17_2 H 0.334734 0.483839 0.571667 0.19 Uiso 0.25 1 calc R U P E -1
C18_2 C 0.442(2) 0.5088(19) 0.601(2) 0.118(19) Uiso 0.25 1 d D U P E -1
O2_2 O 0.442(3) 0.503(2) 0.515(3) 0.144(18) Uiso 0.25 1 d D U P E -1
H2K_2 H 0.404005 0.517308 0.478013 0.216 Uiso 0.25 1 calc R U P E -1
C16_2 C 0.502(2) 0.527(2) 0.670(2) 0.116(19) Uiso 0.25 1 d D U P E -1
H16_2 H 0.547125 0.533858 0.658453 0.14 Uiso 0.25 1 calc R U P E -1
C14_2 C 0.4994(18) 0.5363(15) 0.758(2) 0.080(11) Uiso 0.25 1 d D U P E -1
C13_2 C 0.565(2) 0.556(3) 0.822(3) 0.14(2) Uiso 0.25 1 d D U P E -1
H13A_2 H 0.584098 0.586725 0.794697 0.167 Uiso 0.25 1 calc R U P E -1
H13B_2 H 0.602719 0.526636 0.836949 0.167 Uiso 0.25 1 calc R U P E -1
C10_2 C 0.555(3) 0.576(3) 0.909(3) 0.120(19) Uiso 0.25 1 d D U P E -1
H10A_2 H 0.603308 0.577086 0.958607 0.145 Uiso 0.25 1 calc R U P E -1
H10B_2 H 0.533567 0.613252 0.90043 0.145 Uiso 0.25 1 calc R U P E -1
C3_2 C 0.5032(18) 0.5373(18) 0.9348(19) 0.077(11) Uiso 0.25 1 d D U P E -1
H3_2 H 0.525504 0.499816 0.941569 0.093 Uiso 0.25 1 calc R U P E -1
C2_2 C 0.493(2) 0.5520(19) 1.023(2) 0.101(16) Uiso 0.25 1 d D U P E -1
H2_2 H 0.465095 0.587441 1.011984 0.121 Uiso 0.25 1 calc R U P E -1
C7_2 C 0.557(3) 0.560(4) 1.109(3) 0.11(2) Uiso 0.25 1 d D U P E -1
H7A_2 H 0.578884 0.596921 1.108521 0.137 Uiso 0.25 1 calc R U P E -1
H7B_2 H 0.595065 0.532163 1.114376 0.137 Uiso 0.25 1 calc R U P E -1
C9_2 C 0.526(2) 0.556(3) 1.187(3) 0.104(16) Uiso 0.25 1 d D U P E -1
H9A_2 H 0.528697 0.591557 1.21739 0.124 Uiso 0.25 1 calc R U P E -1
H9B_2 H 0.554632 0.528512 1.231825 0.124 Uiso 0.25 1 calc R U P E -1
C5_2 C 0.445(2) 0.5373(18) 1.143(2) 0.099(15) Uiso 0.25 1 d D U P E -1
H5_2 H 0.410439 0.569286 1.131706 0.119 Uiso 0.25 1 calc R U P E -1
O1_2 O 0.426(3) 0.497(2) 1.199(4) 0.15(2) Uiso 0.25 1 d D U P E -1
H1_2 H 0.455431 0.499234 1.25239 0.225 Uiso 0.25 1 calc R U P E -1
O2_3 O 0.441(3) 0.556(2) 0.527(3) 0.151(19) Uiso 0.25 1 d D U P F -2
H2_3 H 0.480469 0.55658 0.514785 0.227 Uiso 0.25 1 calc R U P F -2
C16_3 C 0.405(2) 0.5367(18) 0.660(2) 0.095(14) Uiso 0.25 1 d D U P F -2
H16_3 H 0.354153 0.544066 0.62706 0.114 Uiso 0.25 1 calc R U P F -2
C18_3 C 0.456(2) 0.5385(17) 0.614(2) 0.106(17) Uiso 0.25 1 d D U P F -2
C17_3 C 0.528(2) 0.525(2) 0.661(3) 0.14(2) Uiso 0.25 1 d D U P F -2
H17_3 H 0.563363 0.523826 0.630872 0.166 Uiso 0.25 1 calc R U P F -2
C15_3 C 0.550(2) 0.515(2) 0.754(3) 0.101(16) Uiso 0.25 1 d D U P F -2
H15_3 H 0.600373 0.507452 0.785809 0.121 Uiso 0.25 1 calc R U P F -2
C12_3 C 0.4993(15) 0.5139(14) 0.8015(17) 0.072(10) Uiso 0.25 1 d D U P F -2
C14_3 C 0.4246(15) 0.5245(14) 0.753(2) 0.072(12) Uiso 0.25 1 d D U P F -2
C13_3 C 0.3687(17) 0.5214(19) 0.792(2) 0.074(11) Uiso 0.25 1 d D U P F -2
H13A_3 H 0.326401 0.500904 0.750053 0.088 Uiso 0.25 1 calc R U P F -2
H13B_3 H 0.351101 0.559065 0.796919 0.088 Uiso 0.25 1 calc R U P F -2
C10_3 C 0.389(2) 0.495(3) 0.884(2) 0.09(2) Uiso 0.25 1 d D U P F -2
H10A_3 H 0.389688 0.454777 0.877889 0.104 Uiso 0.25 1 calc R U P F -2
H10B_3 H 0.352121 0.504754 0.913327 0.104 Uiso 0.25 1 calc R U P F -2
C3_3 C 0.4649(15) 0.5151(19) 0.9417(18) 0.077(11) Uiso 0.25 1 d D U P F -2
H3_3 H 0.462018 0.555911 0.945149 0.093 Uiso 0.25 1 calc R U P F -2
C2_3 C 0.4900(16) 0.4940(19) 1.0373(17) 0.081(12) Uiso 0.25 1 d D U P F -2
H2A_3 H 0.496527 0.453688 1.031822 0.097 Uiso 0.25 1 calc R U P F -2
C7_3 C 0.446(2) 0.500(3) 1.101(3) 0.091(14) Uiso 0.25 1 d D U P F -2
H7A_3 H 0.402948 0.474896 1.082998 0.11 Uiso 0.25 1 calc R U P F -2
H7B_3 H 0.428695 0.537955 1.101014 0.11 Uiso 0.25 1 calc R U P F -2
C9_3 C 0.502(2) 0.484(4) 1.194(3) 0.13(2) Uiso 0.25 1 d D U P F -2
H9A_3 H 0.500387 0.510436 1.240997 0.153 Uiso 0.25 1 calc R U P F -2
H9B_3 H 0.491353 0.44693 1.21178 0.153 Uiso 0.25 1 calc R U P F -2
C5_3 C 0.577(2) 0.485(2) 1.182(2) 0.107(17) Uiso 0.25 1 d D U P F -2
H5_3 H 0.590373 0.446392 1.172973 0.129 Uiso 0.25 1 calc R U P F -2
O1_3 O 0.634(2) 0.505(2) 1.261(3) 0.110(13) Uiso 0.25 1 d D U P F -2
H1_3 H 0.672696 0.510979 1.24787 0.165 Uiso 0.25 1 calc R U P F -2
C1_3 C 0.5663(16) 0.5152(16) 1.093(2) 0.090(13) Uiso 0.25 1 d D U P F -2
C11_3 C 0.564(3) 0.5765(16) 1.111(4) 0.087(17) Uiso 0.25 1 d D U P F -2
H11A_3 H 0.527668 0.583834 1.141178 0.13 Uiso 0.25 1 calc R U P F -2
H11B_3 H 0.613493 0.588472 1.151117 0.13 Uiso 0.25 1 calc R U P F -2
H11C_3 H 0.551012 0.596622 1.053804 0.13 Uiso 0.25 1 calc R U P F -2
C6_3 C 0.6211(19) 0.499(2) 1.047(2) 0.079(12) Uiso 0.25 1 d D U P F -2
H6A_3 H 0.626655 0.4584 1.050541 0.095 Uiso 0.25 1 calc R U P F -2
H6B_3 H 0.669921 0.514919 1.081087 0.095 Uiso 0.25 1 calc R U P F -2
C4_3 C 0.5197(15) 0.5022(17) 0.8933(16) 0.065(10) Uiso 0.25 1 d D U P F -2
H4_3 H 0.520313 0.46123 0.893829 0.078 Uiso 0.25 1 calc R U P F -2
C8_3 C 0.5993(15) 0.5162(17) 0.9475(19) 0.061(9) Uiso 0.25 1 d D U P F -2
H8A_3 H 0.606518 0.556216 0.944693 0.073 Uiso 0.25 1 calc R U P F -2
H8B_3 H 0.632597 0.49792 0.919523 0.073 Uiso 0.25 1 calc R U P F -2
O1W O 0.997(2) 0.4693(14) 1.027(2) 0.164(12) Uiso 0.5 1 d . . P G 1
O3W O 0.0155(10) 0.5317(15) 0.885(2) 0.171(15) Uani 0.5 1 d . . P H 2
O2WA O 0.998(2) 0.4152(17) 0.8727(19) 0.174(12) Uiso 0.5 1 d D . P I 1
O2WB O 1.0271(10) 0.3906(8) 0.8397(13) 0.088(5) Uiso 0.5 1 d . . P J 2
O4WA O -0.0813(19) 0.5256(13) 0.685(2) 0.126(9) Uiso 0.5 1 d . . P K 1
O4WB O -0.0458(15) 0.5213(10) 0.6958(16) 0.101(6) Uiso 0.5 1 d . . P L 2
O5W O -0.0739(10) 0.6311(8) 0.7565(13) 0.165(6) Uiso 1 1 d . . . . .
O6W O 0.8983(5) 0.4137(4) 0.7060(6) 0.094(3) Uani 1 1 d D . . . .
O7W O 0.9565(4) 0.3677(3) 0.5839(5) 0.0661(16) Uiso 1 1 d . . . . .
O8WA O 0.9124(6) 0.3681(5) 0.9685(8) 0.069(2) Uiso 0.7 1 d . . P M 1
OW8B O 0.9035(13) 0.3497(11) 1.0093(18) 0.070(6) Uiso 0.3 1 d . . P N 2
O9WA O 0.5562(10) 0.1751(8) 0.8935(13) 0.105(5) Uiso 0.6 1 d . . P O 1
O9WB O 0.5848(13) 0.1777(10) 1.0246(16) 0.091(6) Uiso 0.4 1 d . . P P 2
O10W O 0 0.4547(5) 0.5 0.087(3) Uani 1 2 d S T P . .
O11W O 0.8823(11) 0.6791(8) 0.5834(13) 0.172(6) Uiso 1 1 d . . . . .
O12W O 0.5 0.1311(14) 0.5 0.200(11) Uiso 1 2 d S . P . .
O13W O 0.670(2) 0.2832(17) 0.565(3) 0.174(12) Uiso 0.5 1 d . . P . .
 
loop_
    _atom_site_aniso_label
    _atom_site_aniso_U_11
    _atom_site_aniso_U_22
    _atom_site_aniso_U_33
    _atom_site_aniso_U_23
    _atom_site_aniso_U_13
    _atom_site_aniso_U_12
C11_1 0.071(5) 0.040(4) 0.076(6) -0.005(4) 0.051(5) 0.001(4)
C21_1 0.058(5) 0.037(4) 0.066(5) 0.000(4) 0.033(4) 0.005(4)
O21_1 0.067(4) 0.040(3) 0.073(4) 0.007(3) 0.030(3) 0.007(3)
C31_1 0.060(4) 0.028(3) 0.052(4) -0.003(3) 0.035(4) -0.001(3)
O31_1 0.067(4) 0.033(3) 0.049(3) 0.002(2) 0.026(3) 0.004(2)
C41_1 0.072(5) 0.035(4) 0.049(4) -0.005(3) 0.040(4) 0.001(4)
O41_1 0.058(3) 0.035(3) 0.047(3) 0.004(2) 0.032(2) -0.003(2)
C51_1 0.108(7) 0.039(4) 0.052(5) -0.003(4) 0.052(5) 0.001(4)
O51_1 0.111(5) 0.050(3) 0.072(4) -0.004(3) 0.070(4) 0.002(4)
C61_1 0.152(12) 0.077(8) 0.049(6) -0.006(5) 0.051(7) -0.004(8)
O61_1 0.26(2) 0.134(11) 0.098(8) -0.011(8) 0.061(10) -0.020(12)
C12_1 0.057(4) 0.034(4) 0.043(4) 0.005(3) 0.020(3) 0.001(3)
C22_1 0.063(4) 0.031(3) 0.037(4) 0.007(3) 0.019(3) 0.000(3)
O22_1 0.060(3) 0.037(3) 0.042(3) 0.001(2) 0.019(2) 0.002(2)
C32_1 0.064(5) 0.033(4) 0.034(3) -0.001(3) 0.024(3) -0.003(3)
O32_1 0.059(3) 0.060(3) 0.039(3) 0.001(2) 0.022(2) 0.012(3)
C42_1 0.053(4) 0.043(4) 0.038(4) 0.005(3) 0.023(3) -0.003(3)
O42_1 0.056(3) 0.041(3) 0.041(3) 0.010(2) 0.022(2) 0.000(2)
C52_1 0.055(4) 0.046(4) 0.042(4) 0.005(3) 0.019(3) 0.000(4)
O52_1 0.061(3) 0.048(3) 0.039(3) 0.008(2) 0.023(2) 0.003(2)
C62_1 0.060(5) 0.071(6) 0.036(4) 0.002(4) 0.023(4) -0.003(4)
O62_1 0.073(4) 0.064(4) 0.049(3) 0.023(3) 0.024(3) 0.010(3)
C13_1 0.060(5) 0.038(4) 0.041(4) 0.012(3) 0.013(3) -0.001(3)
C23_1 0.047(4) 0.039(4) 0.047(4) 0.008(3) 0.012(3) 0.007(3)
O23_1 0.056(3) 0.050(3) 0.047(3) -0.004(2) 0.016(2) 0.008(3)
C33_1 0.057(4) 0.038(4) 0.044(4) 0.012(3) 0.026(3) 0.012(3)
O33_1 0.051(3) 0.057(3) 0.041(3) 0.000(2) 0.020(2) 0.007(3)
C43_1 0.061(4) 0.032(4) 0.044(4) 0.013(3) 0.020(3) 0.000(3)
O43_1 0.067(3) 0.030(3) 0.044(3) 0.011(2) 0.028(3) 0.007(2)
C53_1 0.073(5) 0.058(5) 0.042(4) 0.000(4) 0.025(4) -0.014(4)
O53_1 0.070(4) 0.062(4) 0.045(3) 0.020(3) 0.020(3) -0.018(3)
C63_1 0.107(9) 0.113(10) 0.041(5) 0.016(6) 0.029(5) -0.035(8)
O63_1 0.128(8) 0.136(9) 0.070(5) 0.037(6) -0.009(5) -0.050(7)
C14_1 0.080(6) 0.027(4) 0.043(4) 0.007(3) 0.016(4) -0.006(4)
C24_1 0.074(5) 0.037(4) 0.057(5) 0.001(4) 0.033(4) -0.005(4)
O24_1 0.072(4) 0.034(3) 0.066(4) -0.005(2) 0.041(3) -0.008(3)
C34_1 0.078(6) 0.032(4) 0.041(4) 0.007(3) 0.022(4) -0.008(4)
O34_1 0.083(4) 0.039(3) 0.049(3) 0.001(2) 0.033(3) -0.016(3)
C44_1 0.076(6) 0.037(4) 0.045(4) 0.006(3) 0.018(4) -0.002(4)
O44_1 0.088(4) 0.028(3) 0.041(3) 0.002(2) 0.015(3) -0.010(3)
C54_1 0.105(8) 0.039(4) 0.044(4) 0.006(3) 0.028(5) -0.002(5)
O54_1 0.092(4) 0.036(3) 0.045(3) 0.005(2) 0.017(3) -0.010(3)
C15_1 0.091(6) 0.026(4) 0.044(4) -0.003(3) 0.023(4) -0.011(4)
C25_1 0.091(6) 0.030(4) 0.038(4) 0.001(3) 0.025(4) -0.007(4)
O25_1 0.111(5) 0.031(3) 0.042(3) -0.002(2) 0.031(3) 0.000(3)
C35_1 0.086(6) 0.030(3) 0.031(4) 0.000(3) 0.020(4) -0.010(4)
O35_1 0.089(4) 0.035(3) 0.036(3) 0.006(2) 0.029(3) 0.008(3)
C45_1 0.071(5) 0.041(4) 0.033(4) -0.002(3) 0.018(3) -0.011(4)
O45_1 0.066(3) 0.049(3) 0.035(3) 0.001(2) 0.014(2) -0.017(3)
C55_1 0.066(5) 0.041(4) 0.033(4) -0.003(3) 0.014(3) -0.009(4)
O55_1 0.084(4) 0.038(3) 0.034(3) -0.002(2) 0.015(3) -0.009(3)
C65_1 0.078(6) 0.063(5) 0.030(4) -0.002(4) 0.021(4) 0.000(4)
O65_1 0.092(4) 0.042(3) 0.036(3) -0.007(2) 0.020(3) -0.001(3)
C16_1 0.061(5) 0.069(6) 0.038(4) -0.014(4) 0.025(4) -0.016(4)
C26_1 0.062(5) 0.044(4) 0.038(4) -0.004(3) 0.023(3) -0.011(4)
O26_1 0.060(3) 0.046(3) 0.038(3) 0.004(2) 0.026(2) -0.002(2)
C36_1 0.059(4) 0.054(5) 0.030(3) 0.001(3) 0.018(3) -0.008(4)
O36_1 0.065(3) 0.059(3) 0.034(3) 0.005(2) 0.021(2) -0.001(3)
C46_1 0.063(5) 0.063(5) 0.037(4) 0.002(4) 0.021(4) -0.011(4)
O46_1 0.053(3) 0.054(3) 0.047(3) 0.013(2) 0.020(2) 0.002(3)
C56_1 0.071(6) 0.128(11) 0.040(5) 0.026(5) 0.020(4) -0.005(6)
O56_1 0.064(4) 0.125(6) 0.034(3) -0.015(3) 0.021(3) -0.010(4)
C66_1 0.061(6) 0.145(14) 0.081(8) 0.024(8) 0.028(6) 0.003(7)
O66_1 0.195(13) 0.132(11) 0.108(8) 0.001(7) 0.085(9) 0.004(10)
C17_1 0.067(5) 0.048(4) 0.042(4) -0.001(3) 0.033(4) 0.000(4)
C27_1 0.058(4) 0.037(4) 0.041(4) 0.003(3) 0.025(3) 0.009(3)
O27_1 0.068(3) 0.040(3) 0.045(3) 0.008(2) 0.027(3) 0.006(3)
C37_1 0.050(4) 0.043(4) 0.037(4) -0.001(3) 0.021(3) 0.006(3)
O37_1 0.059(3) 0.049(3) 0.039(3) 0.001(2) 0.024(2) -0.003(2)
C47_1 0.060(5) 0.041(4) 0.047(4) -0.002(3) 0.029(4) 0.003(3)
O47_1 0.067(3) 0.041(3) 0.060(3) 0.001(2) 0.044(3) 0.008(3)
C57_1 0.068(5) 0.064(5) 0.045(4) 0.006(4) 0.026(4) -0.011(4)
O57_1 0.070(4) 0.078(4) 0.040(3) -0.006(3) 0.029(3) -0.018(3)
C67_1 0.094(8) 0.117(11) 0.049(5) 0.004(6) 0.019(5) -0.039(8)
O67A_1 0.110(11) 0.163(16) 0.079(9) -0.039(10) 0.069(9) -0.058(12)
O67B_1 0.118(17) 0.13(2) 0.050(10) -0.002(11) 0.041(11) -0.045(15)
O3W 0.052(9) 0.23(3) 0.25(3) -0.13(3) 0.067(14) -0.024(13)
O6W 0.103(6) 0.094(6) 0.091(6) 0.001(5) 0.040(5) 0.022(5)
O10W 0.088(7) 0.069(7) 0.096(8) 0 0.020(6) 0
 
 
#----------------------------------------------------------------------------#
#                   MOLECULAR GEOMETRY                                       #
#----------------------------------------------------------------------------#
 
_geom_special_details
;
 All esds (except the esd in the dihedral angle between two l.s. planes)
 are estimated using the full covariance matrix.  The cell esds are taken
 into account individually in the estimation of esds in distances, angles
 and torsion angles; correlations between esds in cell parameters are only
 used when they are defined by crystal symmetry.  An approximate (isotropic)
 treatment of cell esds is used for estimating esds involving l.s. planes.
;
loop_
    _geom_bond_atom_site_label_1
    _geom_bond_atom_site_label_2
    _geom_bond_distance
    _geom_bond_site_symmetry_2
    _geom_bond_publ_flag
C11_1 O51_1 1.401(12) . ?
C11_1 O47_1 1.416(11) . ?
C11_1 C21_1 1.508(13) . ?
C21_1 O21_1 1.405(11) . ?
C21_1 C31_1 1.514(11) . ?
C31_1 O31_1 1.425(10) . ?
C31_1 C41_1 1.512(11) . ?
C41_1 O41_1 1.435(10) . ?
C41_1 C51_1 1.535(12) . ?
O41_1 C12_1 1.426(9) . ?
C51_1 O51_1 1.441(12) . ?
C51_1 C61_1 1.485(14) . ?
C61_1 O61_1 1.414(18) . ?
C12_1 O52_1 1.413(10) . ?
C12_1 C22_1 1.489(11) . ?
C22_1 O22_1 1.419(9) . ?
C22_1 C32_1 1.509(12) . ?
C32_1 O32_1 1.424(9) . ?
C32_1 C42_1 1.517(11) . ?
C42_1 O42_1 1.429(10) . ?
C42_1 C52_1 1.523(11) . ?
O42_1 C13_1 1.413(10) . ?
C52_1 O52_1 1.445(10) . ?
C52_1 C62_1 1.521(11) . ?
C62_1 O62_1 1.425(13) . ?
C13_1 O53_1 1.421(10) . ?
C13_1 C23_1 1.531(12) . ?
C23_1 O23_1 1.410(10) . ?
C23_1 C33_1 1.523(11) . ?
C33_1 O33_1 1.430(9) . ?
C33_1 C43_1 1.502(11) . ?
C43_1 O43_1 1.426(9) . ?
C43_1 C53_1 1.534(12) . ?
O43_1 C14_1 1.377(11) . ?
C53_1 O53_1 1.440(11) . ?
C53_1 C63_1 1.484(14) . ?
C63_1 O63_1 1.40(2) . ?
C14_1 O54_1 1.412(10) . ?
C14_1 C24_1 1.533(12) . ?
C24_1 O24_1 1.412(11) . ?
C24_1 C34_1 1.524(12) . ?
C34_1 O34_1 1.424(10) . ?
C34_1 C44_1 1.504(12) . ?
C44_1 O44_1 1.430(10) . ?
C44_1 C54_1 1.529(13) . ?
O44_1 C15_1 1.426(10) . ?
C54_1 O54_1 1.439(11) . ?
C54_1 C64A_1 1.471(15) . ?
C54_1 C64B_1 1.656(19) . ?
C64A_1 O64A_1 1.450(17) . ?
C64B_1 O64B_1 1.44(2) . ?
C15_1 O55_1 1.413(10) . ?
C15_1 C25_1 1.497(11) . ?
C25_1 O25_1 1.428(10) . ?
C25_1 C35_1 1.491(14) . ?
C35_1 O35_1 1.424(9) . ?
C35_1 C45_1 1.527(11) . ?
C45_1 O45_1 1.426(11) . ?
C45_1 C55_1 1.512(11) . ?
O45_1 C16_1 1.397(12) . ?
C55_1 O55_1 1.411(11) . ?
C55_1 C65_1 1.549(11) . ?
C65_1 O65_1 1.415(12) . ?
C16_1 O56_1 1.389(10) . ?
C16_1 C26_1 1.521(12) . ?
C26_1 O26_1 1.432(9) . ?
C26_1 C36_1 1.503(12) . ?
C36_1 O36_1 1.427(10) . ?
C36_1 C46_1 1.513(11) . ?
C46_1 O46_1 1.446(11) . ?
C46_1 C56_1 1.509(13) . ?
O46_1 C17_1 1.402(10) . ?
C56_1 O56_1 1.453(14) . ?
C56_1 C66_1 1.624(15) . ?
C66_1 O66_1 1.401(17) . ?
C17_1 O57_1 1.413(10) . ?
C17_1 C27_1 1.506(12) . ?
C27_1 O27_1 1.432(9) . ?
C27_1 C37_1 1.542(11) . ?
C37_1 O37_1 1.388(10) . ?
C37_1 C47_1 1.517(11) . ?
C47_1 O47_1 1.437(10) . ?
C47_1 C57_1 1.531(13) . ?
C57_1 O57_1 1.430(12) . ?
C57_1 C67_1 1.543(14) . ?
C67_1 O67A_1 1.436(13) . ?
C67_1 O67B_1 1.450(13) . ?
C11_2 C1_2 1.53(3) . ?
C1_2 C6_2 1.51(3) . ?
C1_2 C2_2 1.51(3) . ?
C1_2 C5_2 1.51(3) . ?
C6_2 C8_2 1.52(3) . ?
C8_2 C4_2 1.51(3) . ?
C4_2 C12_2 1.37(2) . ?
C4_2 C3_2 1.51(3) . ?
C12_2 C14_2 1.39(2) . ?
C12_2 C15_2 1.40(3) . ?
C15_2 C17_2 1.39(3) . ?
C17_2 C18_2 1.38(3) . ?
C18_2 C16_2 1.36(3) . ?
C18_2 O2_2 1.37(3) . ?
C16_2 C14_2 1.41(3) . ?
C14_2 C13_2 1.40(3) . ?
C13_2 C10_2 1.51(3) . ?
C10_2 C3_2 1.51(3) . ?
C3_2 C2_2 1.50(3) . ?
C2_2 C7_2 1.49(3) . ?
C7_2 C9_2 1.52(3) . ?
C9_2 C5_2 1.54(3) . ?
C5_2 O1_2 1.45(3) . ?
O2_3 C18_3 1.36(3) . ?
C16_3 C18_3 1.39(3) . ?
C16_3 C14_3 1.40(2) . ?
C18_3 C17_3 1.37(3) . ?
C17_3 C15_3 1.38(3) . ?
C15_3 C12_3 1.40(3) . ?
C12_3 C4_3 1.38(2) . ?
C12_3 C14_3 1.40(2) . ?
C14_3 C13_3 1.40(2) . ?
C13_3 C10_3 1.50(3) . ?
C10_3 C3_3 1.51(3) . ?
C3_3 C2_3 1.50(2) . ?
C3_3 C4_3 1.51(3) . ?
C2_3 C7_3 1.50(3) . ?
C2_3 C1_3 1.52(3) . ?
C7_3 C9_3 1.54(3) . ?
C9_3 C5_3 1.51(3) . ?
C5_3 O1_3 1.42(3) . ?
C5_3 C1_3 1.52(3) . ?
C1_3 C6_3 1.51(3) . ?
C1_3 C11_3 1.53(3) . ?
C6_3 C8_3 1.53(3) . ?
C4_3 C8_3 1.51(2) . ?
O1W O1W 0.89(7) 2_757 ?
 
loop_
    _geom_angle_atom_site_label_1
    _geom_angle_atom_site_label_2
    _geom_angle_atom_site_label_3
    _geom_angle
    _geom_angle_site_symmetry_1
    _geom_angle_site_symmetry_3
    _geom_angle_publ_flag
O51_1 C11_1 O47_1 111.9(8) . . ?
O51_1 C11_1 C21_1 111.3(7) . . ?
O47_1 C11_1 C21_1 107.6(7) . . ?
O21_1 C21_1 C11_1 111.5(7) . . ?
O21_1 C21_1 C31_1 111.0(7) . . ?
C11_1 C21_1 C31_1 110.5(7) . . ?
O31_1 C31_1 C41_1 110.6(6) . . ?
O31_1 C31_1 C21_1 110.4(7) . . ?
C41_1 C31_1 C21_1 109.1(6) . . ?
O41_1 C41_1 C31_1 106.7(6) . . ?
O41_1 C41_1 C51_1 108.8(7) . . ?
C31_1 C41_1 C51_1 112.2(6) . . ?
C12_1 O41_1 C41_1 118.6(6) . . ?
O51_1 C51_1 C61_1 109.4(8) . . ?
O51_1 C51_1 C41_1 109.1(8) . . ?
C61_1 C51_1 C41_1 112.6(8) . . ?
C11_1 O51_1 C51_1 114.3(6) . . ?
O61_1 C61_1 C51_1 114.1(11) . . ?
O52_1 C12_1 O41_1 110.4(6) . . ?
O52_1 C12_1 C22_1 110.7(6) . . ?
O41_1 C12_1 C22_1 108.1(6) . . ?
O22_1 C22_1 C12_1 110.9(6) . . ?
O22_1 C22_1 C32_1 111.3(6) . . ?
C12_1 C22_1 C32_1 110.0(6) . . ?
O32_1 C32_1 C22_1 110.3(6) . . ?
O32_1 C32_1 C42_1 110.4(6) . . ?
C22_1 C32_1 C42_1 108.9(6) . . ?
O42_1 C42_1 C32_1 107.8(6) . . ?
O42_1 C42_1 C52_1 108.5(6) . . ?
C32_1 C42_1 C52_1 111.5(6) . . ?
C13_1 O42_1 C42_1 116.4(6) . . ?
O52_1 C52_1 C62_1 105.3(6) . . ?
O52_1 C52_1 C42_1 109.9(6) . . ?
C62_1 C52_1 C42_1 113.2(7) . . ?
C12_1 O52_1 C52_1 113.4(6) . . ?
O62_1 C62_1 C52_1 111.9(7) . . ?
O42_1 C13_1 O53_1 109.9(7) . . ?
O42_1 C13_1 C23_1 108.4(6) . . ?
O53_1 C13_1 C23_1 110.4(7) . . ?
O23_1 C23_1 C33_1 111.1(6) . . ?
O23_1 C23_1 C13_1 109.1(6) . . ?
C33_1 C23_1 C13_1 110.4(7) . . ?
O33_1 C33_1 C43_1 109.9(7) . . ?
O33_1 C33_1 C23_1 111.0(7) . . ?
C43_1 C33_1 C23_1 109.4(6) . . ?
O43_1 C43_1 C33_1 108.5(6) . . ?
O43_1 C43_1 C53_1 110.0(7) . . ?
C33_1 C43_1 C53_1 109.7(7) . . ?
C14_1 O43_1 C43_1 118.9(6) . . ?
O53_1 C53_1 C63_1 107.0(7) . . ?
O53_1 C53_1 C43_1 109.2(7) . . ?
C63_1 C53_1 C43_1 115.5(9) . . ?
C13_1 O53_1 C53_1 114.6(6) . . ?
O63_1 C63_1 C53_1 112.2(12) . . ?
O43_1 C14_1 O54_1 111.7(8) . . ?
O43_1 C14_1 C24_1 109.0(7) . . ?
O54_1 C14_1 C24_1 109.4(7) . . ?
O24_1 C24_1 C34_1 112.3(7) . . ?
O24_1 C24_1 C14_1 110.0(7) . . ?
C34_1 C24_1 C14_1 108.8(7) . . ?
O34_1 C34_1 C44_1 109.3(7) . . ?
O34_1 C34_1 C24_1 110.4(8) . . ?
C44_1 C34_1 C24_1 109.1(7) . . ?
O44_1 C44_1 C34_1 107.9(7) . . ?
O44_1 C44_1 C54_1 108.7(8) . . ?
C34_1 C44_1 C54_1 111.4(7) . . ?
C15_1 O44_1 C44_1 119.6(7) . . ?
O54_1 C54_1 C64A_1 112.2(9) . . ?
O54_1 C54_1 C44_1 109.7(8) . . ?
C64A_1 C54_1 C44_1 117.8(9) . . ?
O54_1 C54_1 C64B_1 101.5(10) . . ?
C44_1 C54_1 C64B_1 103.9(9) . . ?
C14_1 O54_1 C54_1 113.8(6) . . ?
O64A_1 C64A_1 C54_1 104.0(12) . . ?
O64B_1 C64B_1 C54_1 103.6(16) . . ?
O55_1 C15_1 O44_1 110.5(7) . . ?
O55_1 C15_1 C25_1 111.3(7) . . ?
O44_1 C15_1 C25_1 106.8(7) . . ?
O25_1 C25_1 C35_1 111.0(7) . . ?
O25_1 C25_1 C15_1 111.0(7) . . ?
C35_1 C25_1 C15_1 110.2(8) . . ?
O35_1 C35_1 C25_1 111.8(7) . . ?
O35_1 C35_1 C45_1 109.0(6) . . ?
C25_1 C35_1 C45_1 109.0(7) . . ?
O45_1 C45_1 C55_1 111.1(7) . . ?
O45_1 C45_1 C35_1 107.4(7) . . ?
C55_1 C45_1 C35_1 110.9(7) . . ?
C16_1 O45_1 C45_1 118.8(6) . . ?
O55_1 C55_1 C45_1 111.8(7) . . ?
O55_1 C55_1 C65_1 105.8(6) . . ?
C45_1 C55_1 C65_1 112.4(7) . . ?
C55_1 O55_1 C15_1 113.2(7) . . ?
O65_1 C65_1 C55_1 109.5(7) . . ?
O56_1 C16_1 O45_1 113.1(8) . . ?
O56_1 C16_1 C26_1 110.3(7) . . ?
O45_1 C16_1 C26_1 107.8(6) . . ?
O26_1 C26_1 C36_1 112.2(6) . . ?
O26_1 C26_1 C16_1 109.6(7) . . ?
C36_1 C26_1 C16_1 110.5(7) . . ?
O36_1 C36_1 C26_1 109.8(6) . . ?
O36_1 C36_1 C46_1 110.0(7) . . ?
C26_1 C36_1 C46_1 107.7(7) . . ?
O46_1 C46_1 C56_1 109.1(8) . . ?
O46_1 C46_1 C36_1 107.3(7) . . ?
C56_1 C46_1 C36_1 110.5(8) . . ?
C17_1 O46_1 C46_1 117.3(7) . . ?
O56_1 C56_1 C46_1 109.3(8) . . ?
O56_1 C56_1 C66_1 103.7(9) . . ?
C46_1 C56_1 C66_1 112.4(9) . . ?
C16_1 O56_1 C56_1 114.2(7) . . ?
O66_1 C66_1 C56_1 111.3(11) . . ?
O46_1 C17_1 O57_1 111.1(7) . . ?
O46_1 C17_1 C27_1 107.8(6) . . ?
O57_1 C17_1 C27_1 111.0(7) . . ?
O27_1 C27_1 C17_1 111.0(7) . . ?
O27_1 C27_1 C37_1 111.1(6) . . ?
C17_1 C27_1 C37_1 110.3(6) . . ?
O37_1 C37_1 C47_1 110.5(7) . . ?
O37_1 C37_1 C27_1 110.9(6) . . ?
C47_1 C37_1 C27_1 108.0(6) . . ?
O47_1 C47_1 C37_1 106.3(6) . . ?
O47_1 C47_1 C57_1 110.4(7) . . ?
C37_1 C47_1 C57_1 112.4(7) . . ?
C11_1 O47_1 C47_1 119.0(6) . . ?
O57_1 C57_1 C47_1 110.4(7) . . ?
O57_1 C57_1 C67_1 105.7(9) . . ?
C47_1 C57_1 C67_1 111.9(8) . . ?
C17_1 O57_1 C57_1 114.9(7) . . ?
O67A_1 C67_1 C57_1 106.8(10) . . ?
O67B_1 C67_1 C57_1 111.7(12) . . ?
C6_2 C1_2 C2_2 107(3) . . ?
C6_2 C1_2 C5_2 114(3) . . ?
C2_2 C1_2 C5_2 102(2) . . ?
C6_2 C1_2 C11_2 110(3) . . ?
C2_2 C1_2 C11_2 115(3) . . ?
C5_2 C1_2 C11_2 109(3) . . ?
C1_2 C6_2 C8_2 110(3) . . ?
C4_2 C8_2 C6_2 114(3) . . ?
C12_2 C4_2 C3_2 113(2) . . ?
C12_2 C4_2 C8_2 117(3) . . ?
C3_2 C4_2 C8_2 109(3) . . ?
C4_2 C12_2 C14_2 121(3) . . ?
C4_2 C12_2 C15_2 120(3) . . ?
C14_2 C12_2 C15_2 119(3) . . ?
C17_2 C15_2 C12_2 121(3) . . ?
C18_2 C17_2 C15_2 120(3) . . ?
C16_2 C18_2 O2_2 122(3) . . ?
C16_2 C18_2 C17_2 120(3) . . ?
O2_2 C18_2 C17_2 119(3) . . ?
C18_2 C16_2 C14_2 121(3) . . ?
C12_2 C14_2 C13_2 125(3) . . ?
C12_2 C14_2 C16_2 120(3) . . ?
C13_2 C14_2 C16_2 116(3) . . ?
C14_2 C13_2 C10_2 113(3) . . ?
C3_2 C10_2 C13_2 109(3) . . ?
C2_2 C3_2 C4_2 110(3) . . ?
C2_2 C3_2 C10_2 113(3) . . ?
C4_2 C3_2 C10_2 110(3) . . ?
C7_2 C2_2 C3_2 122(3) . . ?
C7_2 C2_2 C1_2 102(3) . . ?
C3_2 C2_2 C1_2 114(3) . . ?
C2_2 C7_2 C9_2 107(2) . . ?
C7_2 C9_2 C5_2 105(2) . . ?
O1_2 C5_2 C1_2 111(3) . . ?
O1_2 C5_2 C9_2 110(3) . . ?
C1_2 C5_2 C9_2 103(2) . . ?
C18_3 C16_3 C14_3 123(3) . . ?
O2_3 C18_3 C17_3 117(3) . . ?
O2_3 C18_3 C16_3 125(3) . . ?
C17_3 C18_3 C16_3 118(3) . . ?
C18_3 C17_3 C15_3 120(3) . . ?
C17_3 C15_3 C12_3 123(3) . . ?
C4_3 C12_3 C14_3 119(2) . . ?
C4_3 C12_3 C15_3 123(3) . . ?
C14_3 C12_3 C15_3 118(2) . . ?
C12_3 C14_3 C16_3 118(2) . . ?
C12_3 C14_3 C13_3 123(2) . . ?
C16_3 C14_3 C13_3 119(3) . . ?
C14_3 C13_3 C10_3 117(3) . . ?
C13_3 C10_3 C3_3 109(3) . . ?
C2_3 C3_3 C10_3 114(3) . . ?
C2_3 C3_3 C4_3 112(2) . . ?
C10_3 C3_3 C4_3 109(3) . . ?
C3_3 C2_3 C7_3 124(3) . . ?
C3_3 C2_3 C1_3 112(3) . . ?
C7_3 C2_3 C1_3 103(2) . . ?
C2_3 C7_3 C9_3 103(2) . . ?
C5_3 C9_3 C7_3 106(2) . . ?
O1_3 C5_3 C9_3 113(3) . . ?
O1_3 C5_3 C1_3 117(3) . . ?
C9_3 C5_3 C1_3 106(2) . . ?
C6_3 C1_3 C2_3 109(2) . . ?
C6_3 C1_3 C5_3 113(3) . . ?
C2_3 C1_3 C5_3 100(2) . . ?
C6_3 C1_3 C11_3 115(3) . . ?
C2_3 C1_3 C11_3 111(3) . . ?
C5_3 C1_3 C11_3 108(3) . . ?
C1_3 C6_3 C8_3 114(2) . . ?
C12_3 C4_3 C3_3 118(2) . . ?
C12_3 C4_3 C8_3 115(2) . . ?
C3_3 C4_3 C8_3 114(2) . . ?
C4_3 C8_3 C6_3 113(2) . . ?
 
loop_
    _geom_torsion_atom_site_label_1
    _geom_torsion_atom_site_label_2
    _geom_torsion_atom_site_label_3
    _geom_torsion_atom_site_label_4
    _geom_torsion
    _geom_torsion_site_symmetry_1
    _geom_torsion_site_symmetry_2
    _geom_torsion_site_symmetry_3
    _geom_torsion_site_symmetry_4
    _geom_torsion_publ_flag
O51_1 C11_1 C21_1 O21_1 -178.7(7) . . . . ?
O47_1 C11_1 C21_1 O21_1 58.3(9) . . . . ?
O51_1 C11_1 C21_1 C31_1 57.3(9) . . . . ?
O47_1 C11_1 C21_1 C31_1 -65.6(9) . . . . ?
O21_1 C21_1 C31_1 O31_1 60.3(8) . . . . ?
C11_1 C21_1 C31_1 O31_1 -175.4(6) . . . . ?
O21_1 C21_1 C31_1 C41_1 -178.0(7) . . . . ?
C11_1 C21_1 C31_1 C41_1 -53.7(9) . . . . ?
O31_1 C31_1 C41_1 O41_1 -66.3(8) . . . . ?
C21_1 C31_1 C41_1 O41_1 172.1(6) . . . . ?
O31_1 C31_1 C41_1 C51_1 174.7(7) . . . . ?
C21_1 C31_1 C41_1 C51_1 53.1(10) . . . . ?
C31_1 C41_1 O41_1 C12_1 122.1(7) . . . . ?
C51_1 C41_1 O41_1 C12_1 -116.7(7) . . . . ?
O41_1 C41_1 C51_1 O51_1 -171.4(6) . . . . ?
C31_1 C41_1 C51_1 O51_1 -53.5(9) . . . . ?
O41_1 C41_1 C51_1 C61_1 67.0(11) . . . . ?
C31_1 C41_1 C51_1 C61_1 -175.2(10) . . . . ?
O47_1 C11_1 O51_1 C51_1 60.3(10) . . . . ?
C21_1 C11_1 O51_1 C51_1 -60.2(10) . . . . ?
C61_1 C51_1 O51_1 C11_1 -179.1(9) . . . . ?
C41_1 C51_1 O51_1 C11_1 57.3(10) . . . . ?
O51_1 C51_1 C61_1 O61_1 61.7(17) . . . . ?
C41_1 C51_1 C61_1 O61_1 -176.8(13) . . . . ?
C41_1 O41_1 C12_1 O52_1 110.8(7) . . . . ?
C41_1 O41_1 C12_1 C22_1 -128.0(7) . . . . ?
O52_1 C12_1 C22_1 O22_1 -176.5(6) . . . . ?
O41_1 C12_1 C22_1 O22_1 62.4(8) . . . . ?
O52_1 C12_1 C22_1 C32_1 59.9(8) . . . . ?
O41_1 C12_1 C22_1 C32_1 -61.1(8) . . . . ?
O22_1 C22_1 C32_1 O32_1 59.2(8) . . . . ?
C12_1 C22_1 C32_1 O32_1 -177.5(6) . . . . ?
O22_1 C22_1 C32_1 C42_1 -179.5(6) . . . . ?
C12_1 C22_1 C32_1 C42_1 -56.2(8) . . . . ?
O32_1 C32_1 C42_1 O42_1 -66.2(8) . . . . ?
C22_1 C32_1 C42_1 O42_1 172.6(6) . . . . ?
O32_1 C32_1 C42_1 C52_1 174.8(6) . . . . ?
C22_1 C32_1 C42_1 C52_1 53.6(8) . . . . ?
C32_1 C42_1 O42_1 C13_1 130.3(7) . . . . ?
C52_1 C42_1 O42_1 C13_1 -108.8(7) . . . . ?
O42_1 C42_1 C52_1 O52_1 -171.6(6) . . . . ?
C32_1 C42_1 C52_1 O52_1 -53.0(8) . . . . ?
O42_1 C42_1 C52_1 C62_1 71.0(8) . . . . ?
C32_1 C42_1 C52_1 C62_1 -170.5(7) . . . . ?
O41_1 C12_1 O52_1 C52_1 58.8(8) . . . . ?
C22_1 C12_1 O52_1 C52_1 -60.8(8) . . . . ?
C62_1 C52_1 O52_1 C12_1 179.0(7) . . . . ?
C42_1 C52_1 O52_1 C12_1 56.7(8) . . . . ?
O52_1 C52_1 C62_1 O62_1 -65.5(9) . . . . ?
C42_1 C52_1 C62_1 O62_1 54.6(9) . . . . ?
C42_1 O42_1 C13_1 O53_1 117.0(7) . . . . ?
C42_1 O42_1 C13_1 C23_1 -122.2(7) . . . . ?
O42_1 C13_1 C23_1 O23_1 56.3(8) . . . . ?
O53_1 C13_1 C23_1 O23_1 176.8(6) . . . . ?
O42_1 C13_1 C23_1 C33_1 -66.1(8) . . . . ?
O53_1 C13_1 C23_1 C33_1 54.4(8) . . . . ?
O23_1 C23_1 C33_1 O33_1 61.8(8) . . . . ?
C13_1 C23_1 C33_1 O33_1 -177.0(6) . . . . ?
O23_1 C23_1 C33_1 C43_1 -176.8(6) . . . . ?
C13_1 C23_1 C33_1 C43_1 -55.7(8) . . . . ?
O33_1 C33_1 C43_1 O43_1 -60.3(8) . . . . ?
C23_1 C33_1 C43_1 O43_1 177.7(6) . . . . ?
O33_1 C33_1 C43_1 C53_1 179.5(6) . . . . ?
C23_1 C33_1 C43_1 C53_1 57.5(8) . . . . ?
C33_1 C43_1 O43_1 C14_1 127.5(7) . . . . ?
C53_1 C43_1 O43_1 C14_1 -112.5(8) . . . . ?
O43_1 C43_1 C53_1 O53_1 -177.3(7) . . . . ?
C33_1 C43_1 C53_1 O53_1 -58.1(9) . . . . ?
O43_1 C43_1 C53_1 C63_1 62.1(11) . . . . ?
C33_1 C43_1 C53_1 C63_1 -178.7(9) . . . . ?
O42_1 C13_1 O53_1 C53_1 62.1(9) . . . . ?
C23_1 C13_1 O53_1 C53_1 -57.5(9) . . . . ?
C63_1 C53_1 O53_1 C13_1 -175.1(9) . . . . ?
C43_1 C53_1 O53_1 C13_1 59.2(10) . . . . ?
O53_1 C53_1 C63_1 O63_1 -60.1(12) . . . . ?
C43_1 C53_1 C63_1 O63_1 61.7(12) . . . . ?
C43_1 O43_1 C14_1 O54_1 113.0(7) . . . . ?
C43_1 O43_1 C14_1 C24_1 -125.9(7) . . . . ?
O43_1 C14_1 C24_1 O24_1 60.8(9) . . . . ?
O54_1 C14_1 C24_1 O24_1 -176.8(7) . . . . ?
O43_1 C14_1 C24_1 C34_1 -62.6(9) . . . . ?
O54_1 C14_1 C24_1 C34_1 59.8(10) . . . . ?
O24_1 C24_1 C34_1 O34_1 61.1(10) . . . . ?
C14_1 C24_1 C34_1 O34_1 -176.9(7) . . . . ?
O24_1 C24_1 C34_1 C44_1 -178.7(7) . . . . ?
C14_1 C24_1 C34_1 C44_1 -56.7(10) . . . . ?
O34_1 C34_1 C44_1 O44_1 -65.1(10) . . . . ?
C24_1 C34_1 C44_1 O44_1 174.0(8) . . . . ?
O34_1 C34_1 C44_1 C54_1 175.6(8) . . . . ?
C24_1 C34_1 C44_1 C54_1 54.7(10) . . . . ?
C34_1 C44_1 O44_1 C15_1 125.8(8) . . . . ?
C54_1 C44_1 O44_1 C15_1 -113.2(8) . . . . ?
O44_1 C44_1 C54_1 O54_1 -172.9(7) . . . . ?
C34_1 C44_1 C54_1 O54_1 -54.1(11) . . . . ?
O44_1 C44_1 C54_1 C64A_1 57.1(13) . . . . ?
C34_1 C44_1 C54_1 C64A_1 175.9(10) . . . . ?
O44_1 C44_1 C54_1 C64B_1 79.2(12) . . . . ?
C34_1 C44_1 C54_1 C64B_1 -162.0(11) . . . . ?
O43_1 C14_1 O54_1 C54_1 58.9(9) . . . . ?
C24_1 C14_1 O54_1 C54_1 -62.0(10) . . . . ?
C64A_1 C54_1 O54_1 C14_1 -168.6(10) . . . . ?
C44_1 C54_1 O54_1 C14_1 58.5(11) . . . . ?
C64B_1 C54_1 O54_1 C14_1 168.0(10) . . . . ?
O54_1 C54_1 C64A_1 O64A_1 -64.5(13) . . . . ?
C44_1 C54_1 C64A_1 O64A_1 64.3(14) . . . . ?
O54_1 C54_1 C64B_1 O64B_1 76.0(18) . . . . ?
C44_1 C54_1 C64B_1 O64B_1 -170.1(15) . . . . ?
C44_1 O44_1 C15_1 O55_1 108.3(9) . . . . ?
C44_1 O44_1 C15_1 C25_1 -130.6(8) . . . . ?
O55_1 C15_1 C25_1 O25_1 -177.9(7) . . . . ?
O44_1 C15_1 C25_1 O25_1 61.4(10) . . . . ?
O55_1 C15_1 C25_1 C35_1 58.7(9) . . . . ?
O44_1 C15_1 C25_1 C35_1 -62.0(9) . . . . ?
O25_1 C25_1 C35_1 O35_1 60.7(8) . . . . ?
C15_1 C25_1 C35_1 O35_1 -175.9(6) . . . . ?
O25_1 C25_1 C35_1 C45_1 -178.8(6) . . . . ?
C15_1 C25_1 C35_1 C45_1 -55.3(8) . . . . ?
O35_1 C35_1 C45_1 O45_1 -63.5(8) . . . . ?
C25_1 C35_1 C45_1 O45_1 174.2(6) . . . . ?
O35_1 C35_1 C45_1 C55_1 175.0(7) . . . . ?
C25_1 C35_1 C45_1 C55_1 52.7(9) . . . . ?
C55_1 C45_1 O45_1 C16_1 -107.0(7) . . . . ?
C35_1 C45_1 O45_1 C16_1 131.7(7) . . . . ?
O45_1 C45_1 C55_1 O55_1 -172.2(6) . . . . ?
C35_1 C45_1 C55_1 O55_1 -52.9(9) . . . . ?
O45_1 C45_1 C55_1 C65_1 69.0(9) . . . . ?
C35_1 C45_1 C55_1 C65_1 -171.7(7) . . . . ?
C45_1 C55_1 O55_1 C15_1 56.3(8) . . . . ?
C65_1 C55_1 O55_1 C15_1 178.9(6) . . . . ?
O44_1 C15_1 O55_1 C55_1 59.4(9) . . . . ?
C25_1 C15_1 O55_1 C55_1 -59.1(10) . . . . ?
O55_1 C55_1 C65_1 O65_1 -61.5(9) . . . . ?
C45_1 C55_1 C65_1 O65_1 60.8(10) . . . . ?
C45_1 O45_1 C16_1 O56_1 111.0(8) . . . . ?
C45_1 O45_1 C16_1 C26_1 -126.8(7) . . . . ?
O56_1 C16_1 C26_1 O26_1 -178.1(7) . . . . ?
O45_1 C16_1 C26_1 O26_1 58.0(8) . . . . ?
O56_1 C16_1 C26_1 C36_1 57.7(10) . . . . ?
O45_1 C16_1 C26_1 C36_1 -66.2(8) . . . . ?
O26_1 C26_1 C36_1 O36_1 60.5(9) . . . . ?
C16_1 C26_1 C36_1 O36_1 -176.8(7) . . . . ?
O26_1 C26_1 C36_1 C46_1 -179.7(7) . . . . ?
C16_1 C26_1 C36_1 C46_1 -57.0(9) . . . . ?
O36_1 C36_1 C46_1 O46_1 -63.9(9) . . . . ?
C26_1 C36_1 C46_1 O46_1 176.5(7) . . . . ?
O36_1 C36_1 C46_1 C56_1 177.1(8) . . . . ?
C26_1 C36_1 C46_1 C56_1 57.6(11) . . . . ?
C56_1 C46_1 O46_1 C17_1 -112.3(9) . . . . ?
C36_1 C46_1 O46_1 C17_1 128.0(7) . . . . ?
O46_1 C46_1 C56_1 O56_1 -174.7(8) . . . . ?
C36_1 C46_1 C56_1 O56_1 -56.9(12) . . . . ?
O46_1 C46_1 C56_1 C66_1 70.7(13) . . . . ?
C36_1 C46_1 C56_1 C66_1 -171.5(10) . . . . ?
O45_1 C16_1 O56_1 C56_1 62.5(11) . . . . ?
C26_1 C16_1 O56_1 C56_1 -58.3(11) . . . . ?
C46_1 C56_1 O56_1 C16_1 58.3(13) . . . . ?
C66_1 C56_1 O56_1 C16_1 178.3(9) . . . . ?
O56_1 C56_1 C66_1 O66_1 -69.7(13) . . . . ?
C46_1 C56_1 C66_1 O66_1 48.3(16) . . . . ?
C46_1 O46_1 C17_1 O57_1 111.5(7) . . . . ?
C46_1 O46_1 C17_1 C27_1 -126.7(7) . . . . ?
O46_1 C17_1 C27_1 O27_1 59.5(8) . . . . ?
O57_1 C17_1 C27_1 O27_1 -178.6(6) . . . . ?
O46_1 C17_1 C27_1 C37_1 -64.0(8) . . . . ?
O57_1 C17_1 C27_1 C37_1 57.9(9) . . . . ?
O27_1 C27_1 C37_1 O37_1 60.2(8) . . . . ?
C17_1 C27_1 C37_1 O37_1 -176.3(6) . . . . ?
O27_1 C27_1 C37_1 C47_1 -178.6(6) . . . . ?
C17_1 C27_1 C37_1 C47_1 -55.1(8) . . . . ?
O37_1 C37_1 C47_1 O47_1 -64.5(8) . . . . ?
C27_1 C37_1 C47_1 O47_1 174.0(7) . . . . ?
O37_1 C37_1 C47_1 C57_1 174.6(7) . . . . ?
C27_1 C37_1 C47_1 C57_1 53.1(9) . . . . ?
O51_1 C11_1 O47_1 C47_1 109.7(8) . . . . ?
C21_1 C11_1 O47_1 C47_1 -127.7(7) . . . . ?
C37_1 C47_1 O47_1 C11_1 127.1(8) . . . . ?
C57_1 C47_1 O47_1 C11_1 -110.8(9) . . . . ?
O47_1 C47_1 C57_1 O57_1 -171.2(7) . . . . ?
C37_1 C47_1 C57_1 O57_1 -52.7(9) . . . . ?
O47_1 C47_1 C57_1 C67_1 71.4(11) . . . . ?
C37_1 C47_1 C57_1 C67_1 -170.2(9) . . . . ?
O46_1 C17_1 O57_1 C57_1 61.0(10) . . . . ?
C27_1 C17_1 O57_1 C57_1 -59.0(10) . . . . ?
C47_1 C57_1 O57_1 C17_1 55.4(10) . . . . ?
C67_1 C57_1 O57_1 C17_1 176.6(8) . . . . ?
O57_1 C57_1 C67_1 O67A_1 -57.6(12) . . . . ?
C47_1 C57_1 C67_1 O67A_1 62.7(13) . . . . ?
O57_1 C57_1 C67_1 O67B_1 70.8(18) . . . . ?
C47_1 C57_1 C67_1 O67B_1 -169.0(15) . . . . ?
C2_2 C1_2 C6_2 C8_2 56(4) . . . . ?
C5_2 C1_2 C6_2 C8_2 169(4) . . . . ?
C11_2 C1_2 C6_2 C8_2 -69(4) . . . . ?
C1_2 C6_2 C8_2 C4_2 -57(6) . . . . ?
C6_2 C8_2 C4_2 C12_2 -176(4) . . . . ?
C6_2 C8_2 C4_2 C3_2 54(5) . . . . ?
C3_2 C4_2 C12_2 C14_2 -21(4) . . . . ?
C8_2 C4_2 C12_2 C14_2 -149(4) . . . . ?
C3_2 C4_2 C12_2 C15_2 160(3) . . . . ?
C8_2 C4_2 C12_2 C15_2 32(5) . . . . ?
C4_2 C12_2 C15_2 C17_2 178(3) . . . . ?
C14_2 C12_2 C15_2 C17_2 -1(3) . . . . ?
C12_2 C15_2 C17_2 C18_2 0(3) . . . . ?
C15_2 C17_2 C18_2 C16_2 1(3) . . . . ?
C15_2 C17_2 C18_2 O2_2 -177(4) . . . . ?
O2_2 C18_2 C16_2 C14_2 176(4) . . . . ?
C17_2 C18_2 C16_2 C14_2 -2(3) . . . . ?
C4_2 C12_2 C14_2 C13_2 1(5) . . . . ?
C15_2 C12_2 C14_2 C13_2 -180(4) . . . . ?
C4_2 C12_2 C14_2 C16_2 -179(3) . . . . ?
C15_2 C12_2 C14_2 C16_2 0(2) . . . . ?
C18_2 C16_2 C14_2 C12_2 1(3) . . . . ?
C18_2 C16_2 C14_2 C13_2 -179(4) . . . . ?
C12_2 C14_2 C13_2 C10_2 -12(6) . . . . ?
C16_2 C14_2 C13_2 C10_2 168(5) . . . . ?
C14_2 C13_2 C10_2 C3_2 40(7) . . . . ?
C12_2 C4_2 C3_2 C2_2 176(3) . . . . ?
C8_2 C4_2 C3_2 C2_2 -52(4) . . . . ?
C12_2 C4_2 C3_2 C10_2 50(4) . . . . ?
C8_2 C4_2 C3_2 C10_2 -178(4) . . . . ?
C13_2 C10_2 C3_2 C2_2 177(5) . . . . ?
C13_2 C10_2 C3_2 C4_2 -59(6) . . . . ?
C4_2 C3_2 C2_2 C7_2 -177(5) . . . . ?
C10_2 C3_2 C2_2 C7_2 -53(7) . . . . ?
C4_2 C3_2 C2_2 C1_2 59(5) . . . . ?
C10_2 C3_2 C2_2 C1_2 -177(4) . . . . ?
C6_2 C1_2 C2_2 C7_2 166(4) . . . . ?
C5_2 C1_2 C2_2 C7_2 45(4) . . . . ?
C11_2 C1_2 C2_2 C7_2 -73(5) . . . . ?
C6_2 C1_2 C2_2 C3_2 -60(4) . . . . ?
C5_2 C1_2 C2_2 C3_2 180(3) . . . . ?
C11_2 C1_2 C2_2 C3_2 62(4) . . . . ?
C3_2 C2_2 C7_2 C9_2 -162(5) . . . . ?
C1_2 C2_2 C7_2 C9_2 -32(7) . . . . ?
C2_2 C7_2 C9_2 C5_2 7(8) . . . . ?
C6_2 C1_2 C5_2 O1_2 87(4) . . . . ?
C2_2 C1_2 C5_2 O1_2 -159(4) . . . . ?
C11_2 C1_2 C5_2 O1_2 -36(4) . . . . ?
C6_2 C1_2 C5_2 C9_2 -156(4) . . . . ?
C2_2 C1_2 C5_2 C9_2 -41(4) . . . . ?
C11_2 C1_2 C5_2 C9_2 81(4) . . . . ?
C7_2 C9_2 C5_2 O1_2 139(6) . . . . ?
C7_2 C9_2 C5_2 C1_2 21(6) . . . . ?
C14_3 C16_3 C18_3 O2_3 -172(4) . . . . ?
C14_3 C16_3 C18_3 C17_3 3(3) . . . . ?
O2_3 C18_3 C17_3 C15_3 171(4) . . . . ?
C16_3 C18_3 C17_3 C15_3 -4(3) . . . . ?
C18_3 C17_3 C15_3 C12_3 3(3) . . . . ?
C17_3 C15_3 C12_3 C4_3 179(3) . . . . ?
C17_3 C15_3 C12_3 C14_3 0(3) . . . . ?
C4_3 C12_3 C14_3 C16_3 180(3) . . . . ?
C15_3 C12_3 C14_3 C16_3 -2(2) . . . . ?
C4_3 C12_3 C14_3 C13_3 -3(4) . . . . ?
C15_3 C12_3 C14_3 C13_3 176(3) . . . . ?
C18_3 C16_3 C14_3 C12_3 0(3) . . . . ?
C18_3 C16_3 C14_3 C13_3 -177(3) . . . . ?
C12_3 C14_3 C13_3 C10_3 -12(5) . . . . ?
C16_3 C14_3 C13_3 C10_3 165(4) . . . . ?
C14_3 C13_3 C10_3 C3_3 43(6) . . . . ?
C13_3 C10_3 C3_3 C2_3 177(4) . . . . ?
C13_3 C10_3 C3_3 C4_3 -57(5) . . . . ?
C10_3 C3_3 C2_3 C7_3 -54(6) . . . . ?
C4_3 C3_3 C2_3 C7_3 -179(4) . . . . ?
C10_3 C3_3 C2_3 C1_3 -180(4) . . . . ?
C4_3 C3_3 C2_3 C1_3 56(4) . . . . ?
C3_3 C2_3 C7_3 C9_3 -168(5) . . . . ?
C1_3 C2_3 C7_3 C9_3 -38(5) . . . . ?
C2_3 C7_3 C9_3 C5_3 15(7) . . . . ?
C7_3 C9_3 C5_3 O1_3 143(5) . . . . ?
C7_3 C9_3 C5_3 C1_3 14(6) . . . . ?
C3_3 C2_3 C1_3 C6_3 -58(4) . . . . ?
C7_3 C2_3 C1_3 C6_3 166(3) . . . . ?
C3_3 C2_3 C1_3 C5_3 -177(3) . . . . ?
C7_3 C2_3 C1_3 C5_3 47(4) . . . . ?
C3_3 C2_3 C1_3 C11_3 69(4) . . . . ?
C7_3 C2_3 C1_3 C11_3 -67(4) . . . . ?
O1_3 C5_3 C1_3 C6_3 81(4) . . . . ?
C9_3 C5_3 C1_3 C6_3 -153(4) . . . . ?
O1_3 C5_3 C1_3 C2_3 -163(4) . . . . ?
C9_3 C5_3 C1_3 C2_3 -37(4) . . . . ?
O1_3 C5_3 C1_3 C11_3 -47(4) . . . . ?
C9_3 C5_3 C1_3 C11_3 79(5) . . . . ?
C2_3 C1_3 C6_3 C8_3 54(4) . . . . ?
C5_3 C1_3 C6_3 C8_3 165(3) . . . . ?
C11_3 C1_3 C6_3 C8_3 -71(4) . . . . ?
C14_3 C12_3 C4_3 C3_3 -15(4) . . . . ?
C15_3 C12_3 C4_3 C3_3 166(3) . . . . ?
C14_3 C12_3 C4_3 C8_3 -154(3) . . . . ?
C15_3 C12_3 C4_3 C8_3 28(4) . . . . ?
C2_3 C3_3 C4_3 C12_3 173(3) . . . . ?
C10_3 C3_3 C4_3 C12_3 46(5) . . . . ?
C2_3 C3_3 C4_3 C8_3 -48(4) . . . . ?
C10_3 C3_3 C4_3 C8_3 -175(4) . . . . ?
C12_3 C4_3 C8_3 C6_3 -176(3) . . . . ?
C3_3 C4_3 C8_3 C6_3 44(5) . . . . ?
C1_3 C6_3 C8_3 C4_3 -48(5) . . . . ?

_shelx_res_file
;
TITL cu_2022kbperst_0m_a.res in C2
    cu_2022KBPERST_0m.res
    created by SHELXL-2018/3 at 15:51:14 on 02-Feb-2023
REM Old TITL cu_2022KBPERST_0m in C2
REM SHELXT solution in C2: R1 0.231, Rweak 0.075, Alpha 0.009
REM <I/s> 0.000 for 0 systematic absences, Orientation as input
REM Flack x = -3.735 ( 0.330 ) from 4707 Parsons' quotients
REM Formula found by SHELXT: C88 O85
CELL 1.54178  19.12450  24.41800  15.60040  90.0000 109.5003  90.0000
ZERR    4.00   0.00150   0.00180   0.00110   0.0000   0.0047   0.0000
LATT -7
SYMM -X,+Y,-Z
SFAC  C  H  O
UNIT 204 328 186
L.S. 10
PLAN  40
SIZE 0.13 0.27 0.4
TEMP -173.15
ACTA
CONF
BOND
LIST 4
WPDB
MORE -1
REM SHEL 100.0 0.84

OMIT    -12 -14  14
OMIT     4   0   0
OMIT    -6   0   2
OMIT    -1  -5   3
OMIT     0   0   6
OMIT    -1  -3   3
OMIT    -1   5   3
OMIT -1 1 1
OMIT -1 3 3
OMIT -1 -1 1
OMIT 1 1 1
OMIT 1 -1 1
OMIT -1 -7 1
OMIT 2 0 2
OMIT -2 0 8
OMIT -1 7 1
OMIT 4 -4 2

DFIX_2 1.530 C1 C11
DFIX_2 1.520 C1    C6
DFIX_2 1.520 C1    C2
DFIX_2 1.520 C1    C5
DFIX_2 1.520 C6    C8
DFIX_2 1.520 C4    C8
DFIX_2 1.390 C4    C12
DFIX_2 1.520 C4    C3
DFIX_2 1.390 C12   C15
DFIX_2 1.390 C12   C14
DFIX_2 1.390 C15   C17
DFIX_2 1.390 C18   C17
DFIX_2 1.360 C18   O2
DFIX_2 1.390 C18   C16
DFIX_2 1.390 C14   C16
DFIX_2 1.390 C14   C13
DFIX_2 1.520 C13   C10
DFIX_2 1.520 C3    C10
DFIX_2 1.520 C3    C2
DFIX_2 1.520 C2    C7
DFIX_2 1.520 C7    C9
DFIX_2 1.520 C5    C9
DFIX_2 1.435 C5    O1
DANG_2 2.491 C11   C6
DANG_2 2.491 C11   C2
DANG_2 2.491 C11   C5
DANG_2 2.483 C6    C2
DANG_2 2.483 C6    C5
DANG_2 2.396 C2    C5
DANG_2 2.483 C1    C8
DANG_2 2.483 C6    C4
DANG_2 2.378 C8    C12
DANG_2 2.483 C8    C3
DANG_2 2.378 C12   C3
DANG_2 2.408 C4    C15
DANG_2 2.408 C4    C14
DANG_2 2.408 C15   C14
DANG_2 2.408 C12   C17
DANG_2 2.408 C15   C18
DANG_2 2.382 C17   O2
DANG_2 2.408 C17   C16
DANG_2 2.382 O2    C16
DANG_2 2.408 C18   C14
DANG_2 2.408 C12   C16
DANG_2 2.408 C12   C13
DANG_2 2.408 C16   C13
DANG_2 2.378 C14   C10
DANG_2 2.483 C13   C3
DANG_2 2.483 C4    C10
DANG_2 2.483 C4    C2
DANG_2 2.483 C10   C2
DANG_2 2.483 C1    C3
DANG_2 2.396 C1    C7
DANG_2 2.483 C3    C7
DANG_2 2.396 C2    C9
DANG_2 2.396 C7    C5
DANG_2 2.396 C1    C9
DANG_2 2.414 C1    O1
DANG_2 2.414 C9    O1
FLAT_2 C12   C4    C15   C14
FLAT_2 C18   C16   O2    C17
FLAT_2 C14   C13   C16   C12
FLAT_2 C12   C15   C17   C18
FLAT_2 C15   C17   C18   C16
FLAT_2 C17   C18   C16   C14
FLAT_2 C18   C16   C14   C12
FLAT_2 C16   C14   C12   C15
FLAT_2 C14   C12   C15   C17

DFIX_3 1.530 C1    C11
DFIX_3 1.520 C1    C6
DFIX_3 1.520 C1    C2
DFIX_3 1.520 C1    C5
DFIX_3 1.520 C6    C8
DFIX_3 1.520 C4    C8

DFIX_3 1.390 C4    C12
DFIX_3 1.520 C4    C3
DFIX_3 1.390 C12   C15
DFIX_3 1.390 C12   C14
DFIX_3 1.390 C15   C17
DFIX_3 1.390 C18   C17
DFIX_3 1.360 C18   O2
DFIX_3 1.390 C18   C16
DFIX_3 1.390 C14   C16
DFIX_3 1.390 C14   C13
DFIX_3 1.520 C13   C10
DFIX_3 1.520 C3    C10
DFIX_3 1.520 C3    C2
DFIX_3 1.520 C2    C7
DFIX_3 1.520 C7    C9
DFIX_3 1.520 C5    C9
DFIX_3 1.435 C5    O1
DANG_3 2.491 C11   C6
DANG_3 2.491 C11   C2
DANG_3 2.491 C11   C5
DANG_3 2.483 C6    C2
DANG_3 2.483 C6    C5
DANG_3 2.396 C2    C5
DANG_3 2.483 C1    C8
DANG_3 2.483 C6    C4
DANG_3 2.378 C8    C12
DANG_3 2.483 C8    C3
DANG_3 2.378 C12   C3
DANG_3 2.408 C4    C15
DANG_3 2.408 C4    C14
DANG_3 2.408 C15   C14
DANG_3 2.408 C12   C17
DANG_3 2.408 C15   C18
DANG_3 2.382 C17   O2
DANG_3 2.408 C17   C16
DANG_3 2.382 O2    C16
DANG_3 2.408 C18   C14
DANG_3 2.408 C12   C16
DANG_3 2.408 C12   C13
DANG_3 2.408 C16   C13
DANG_3 2.378 C14   C10
DANG_3 2.483 C13   C3
DANG_3 2.483 C4    C10
DANG_3 2.483 C4    C2
DANG_3 2.483 C10   C2
DANG_3 2.483 C1    C3
DANG_3 2.396 C1    C7
DANG_3 2.483 C3    C7
DANG_3 2.396 C2    C9
DANG_3 2.396 C7    C5
DANG_3 2.396 C1    C9
DANG_3 2.414 C1    O1
DANG_3 2.414 C9    O1
FLAT_3 C12   C4    C15   C14
FLAT_3 C18   C16   O2    C17
FLAT_3 C14   C13   C16   C12
FLAT_3 C12   C15   C17   C18
FLAT_3 C15   C17   C18   C16
FLAT_3 C17   C18   C16   C14
FLAT_3 C18   C16   C14   C12
FLAT_3 C16   C14   C12   C15
FLAT_3 C14   C12   C15   C17

DFIX_1 1.530 C54    C64A
DFIX_1 1.430 C64A    O64A
DANG_1 2.491 C44    C64A
DANG_1 2.422 C64A    O54
DANG_1 2.418 C54    O64A
DFIX_1 1.530 C54    C64B
DFIX_1 1.430 C64B    O64b
DANG_1 2.491 C44    C64B
DANG_1 2.422 C64B    O54
DANG_1 2.418 C54    O64B
DFIX_1 1.530 C56    C66
DFIX_1 1.430 C66    O66
DANG_1 2.491 C46    C66
DANG_1 2.422 C66    O56
DANG_1 2.418 C56    O66
DFIX_1 1.430 0.01 C67    O67A
DFIX_1 1.430 0.01 C67    O67B
DFIX_1 -2.2 H46 H17
DFIX -2.7 O6W O2WA

WGHT    0.176900   15.852800
SWAT    0.305903    2.7472
FVAR       0.07052
MOLE 1
RESI 1 UNL
C11   1    0.799419    0.489340    0.820732    11.00000    0.07125    0.04035 =
         0.07568   -0.00536    0.05142    0.00072
AFIX  13
H11   2    0.836540    0.460605    0.820244    11.00000   -1.20000
AFIX   0
C21   1    0.830102    0.522799    0.906377    11.00000    0.05838    0.03738 =
         0.06582   -0.00040    0.03266    0.00464
AFIX  13
H21   2    0.877858    0.539515    0.906456    11.00000   -1.20000
AFIX   0
O21   3    0.845275    0.490021    0.984518    11.00000    0.06703    0.04040 =
         0.07289    0.00721    0.03048    0.00749
AFIX  83
H21A  2    0.885347    0.500127    1.023385    11.00000   -1.50000
AFIX   0
C31   1    0.777443    0.568891    0.907536    11.00000    0.06033    0.02775 =
         0.05248   -0.00328    0.03544   -0.00096
AFIX  13
H31   2    0.730215    0.552846    0.910563    11.00000   -1.20000
AFIX   0
O31   3    0.809091    0.603028    0.984915    11.00000    0.06685    0.03341 =
         0.04903    0.00191    0.02610    0.00424
AFIX 147
H31A  2    0.781610    0.630331    0.981701    11.00000   -1.50000
AFIX   0
C41   1    0.760608    0.601716    0.820785    11.00000    0.07190    0.03492 =
         0.04938   -0.00495    0.04029    0.00109
AFIX  13
H41   2    0.805928    0.622227    0.821012    11.00000   -1.20000
AFIX   0
O41   3    0.703021    0.639677    0.819531    11.00000    0.05836    0.03460 =
         0.04717    0.00434    0.03217   -0.00314
C51   1    0.733192    0.565488    0.735641    11.00000    0.10797    0.03875 =
         0.05197   -0.00350    0.05243    0.00093
AFIX  13
H51   2    0.684644    0.548860    0.732631    11.00000   -1.20000
AFIX   0
O51   3    0.785886    0.522023    0.743040    11.00000    0.11115    0.05006 =
         0.07248   -0.00372    0.07008    0.00246
C61   1    0.722553    0.596620    0.650468    11.00000    0.15207    0.07686 =
         0.04943   -0.00595    0.05141   -0.00415
AFIX  23
H61A  2    0.688522    0.627619    0.647780    11.00000   -1.20000
H61B  2    0.770885    0.612118    0.652377    11.00000   -1.20000
AFIX   0
O61   3    0.693598    0.565068    0.570371    11.00000    0.26255    0.13414 =
         0.09768   -0.01099    0.06139   -0.02048
AFIX  83
H61   2    0.727718    0.557677    0.549536    11.00000   -1.50000
AFIX   0
C12   1    0.716588    0.696784    0.813958    11.00000    0.05740    0.03407 =
         0.04318    0.00544    0.02049    0.00116
AFIX  13
H12   2    0.770178    0.702512    0.821976    11.00000   -1.20000
AFIX   0
C22   1    0.698916    0.724968    0.888888    11.00000    0.06252    0.03134 =
         0.03669    0.00685    0.01861    0.00007
AFIX  13
H22   2    0.707606    0.765093    0.884457    11.00000   -1.20000
AFIX   0
O22   3    0.745957    0.706338    0.975018    11.00000    0.06007    0.03715 =
         0.04201    0.00081    0.01912    0.00191
AFIX  83
H22A  2    0.759563    0.733119    1.010501    11.00000   -1.50000
AFIX   0
C32   1    0.618257    0.716618    0.878074    11.00000    0.06437    0.03253 =
         0.03354   -0.00105    0.02356   -0.00288
AFIX  13
H32   2    0.608862    0.676658    0.883121    11.00000   -1.20000
AFIX   0
O32   3    0.600087    0.745447    0.947190    11.00000    0.05897    0.05964 =
         0.03915    0.00073    0.02180    0.01246
AFIX 147
H32A  2    0.553779    0.746537    0.933964    11.00000   -1.50000
AFIX   0
C42   1    0.570953    0.736781    0.784727    11.00000    0.05315    0.04275 =
         0.03841    0.00499    0.02297   -0.00339
AFIX  13
H42   2    0.575131    0.777506    0.781717    11.00000   -1.20000
AFIX   0
O42   3    0.495788    0.722024    0.771519    11.00000    0.05609    0.04090 =
         0.04133    0.00952    0.02174   -0.00044
C52   1    0.593977    0.710412    0.709802    11.00000    0.05490    0.04584 =
         0.04231    0.00506    0.01949   -0.00044
AFIX  13
H52   2    0.582223    0.670403    0.706664    11.00000   -1.20000
AFIX   0
O52   3    0.672680    0.717745    0.728508    11.00000    0.06071    0.04810 =
         0.03933    0.00811    0.02269    0.00302
C62   1    0.556902    0.736240    0.616958    11.00000    0.05969    0.07091 =
         0.03643    0.00183    0.02281   -0.00315
AFIX  23
H62A  2    0.576971    0.719324    0.572366    11.00000   -1.20000
H62B  2    0.502971    0.728704    0.596893    11.00000   -1.20000
AFIX   0
O62   3    0.568537    0.793946    0.618501    11.00000    0.07273    0.06431 =
         0.04941    0.02296    0.02389    0.01046
AFIX 147
H62   2    0.608967    0.800541    0.610350    11.00000   -1.50000
AFIX   0
C13   1    0.442457    0.764119    0.741536    11.00000    0.06047    0.03782 =
         0.04130    0.01171    0.01250   -0.00148
AFIX  13
H13   2    0.468015    0.799281    0.737586    11.00000   -1.20000
AFIX   0
C23   1    0.402056    0.770282    0.810775    11.00000    0.04704    0.03888 =
         0.04724    0.00834    0.01192    0.00681
AFIX  13
H23   2    0.367641    0.802311    0.792962    11.00000   -1.20000
AFIX   0
O23   3    0.454573    0.780421    0.897296    11.00000    0.05570    0.05039 =
         0.04694   -0.00354    0.01556    0.00758
AFIX 147
H23A  2    0.446857    0.811471    0.915537    11.00000   -1.50000
AFIX   0
C33   1    0.356808    0.719084    0.811678    11.00000    0.05687    0.03773 =
         0.04404    0.01229    0.02602    0.01164
AFIX  13
H33   2    0.391332    0.687276    0.832018    11.00000   -1.20000
AFIX   0
O33   3    0.315764    0.725391    0.872698    11.00000    0.05143    0.05676 =
         0.04101   -0.00021    0.01962    0.00721
AFIX 147
H33A  2    0.343847    0.719738    0.926235    11.00000   -1.50000
AFIX   0
C43   1    0.304683    0.708031    0.717280    11.00000    0.06066    0.03219 =
         0.04375    0.01308    0.01971   -0.00041
AFIX  13
H43   2    0.268952    0.739140    0.696906    11.00000   -1.20000
AFIX   0
O43   3    0.265017    0.658821    0.718872    11.00000    0.06739    0.02973 =
         0.04426    0.01118    0.02793    0.00691
C53   1    0.348939    0.701755    0.651945    11.00000    0.07334    0.05784 =
         0.04209    0.00023    0.02533   -0.01372
AFIX  13
H53   2    0.384286    0.670517    0.673470    11.00000   -1.20000
AFIX   0
O53   3    0.391359    0.750832    0.654433    11.00000    0.06990    0.06214 =
         0.04503    0.02045    0.01987   -0.01775
C63   1    0.304079    0.691894    0.555308    11.00000    0.10729    0.11332 =
         0.04150    0.01593    0.02883   -0.03498
AFIX  23
H63A  2    0.337736    0.686576    0.519632    11.00000   -1.20000
H63B  2    0.274925    0.657870    0.550855    11.00000   -1.20000
AFIX   0
O63   3    0.255700    0.735368    0.517937    11.00000    0.12810    0.13560 =
         0.07001    0.03702   -0.00949   -0.04983
AFIX 147
H63   2    0.212864    0.723062    0.491580    11.00000   -1.50000
AFIX   0
C14   1    0.188699    0.659410    0.683497    11.00000    0.07970    0.02699 =
         0.04334    0.00691    0.01638   -0.00551
AFIX  13
H14   2    0.171620    0.697989    0.667954    11.00000   -1.20000
AFIX   0
C24   1    0.157159    0.637904    0.755436    11.00000    0.07374    0.03700 =
         0.05693    0.00088    0.03253   -0.00540
AFIX  13
H24   2    0.101776    0.638828    0.729479    11.00000   -1.20000
AFIX   0
O24   3    0.180117    0.671867    0.833109    11.00000    0.07196    0.03437 =
         0.06573   -0.00528    0.04080   -0.00801
AFIX  83
H24A  2    0.145919    0.674119    0.855516    11.00000   -1.50000
AFIX   0
C34   1    0.181757    0.578677    0.777435    11.00000    0.07844    0.03169 =
         0.04079    0.00728    0.02184   -0.00763
AFIX  13
H34   2    0.237077    0.577263    0.804245    11.00000   -1.20000
AFIX   0
O34   3    0.150208    0.556330    0.840554    11.00000    0.08345    0.03931 =
         0.04924    0.00052    0.03295   -0.01615
AFIX  83
H34A  2    0.103818    0.559284    0.819541    11.00000   -1.50000
AFIX   0
C44   1    0.156818    0.545515    0.691302    11.00000    0.07591    0.03675 =
         0.04503    0.00553    0.01754   -0.00205
AFIX  13
H44   2    0.101427    0.543363    0.667952    11.00000   -1.20000
AFIX   0
O44   3    0.187203    0.491699    0.712183    11.00000    0.08848    0.02795 =
         0.04116    0.00232    0.01488   -0.01029
C54   1    0.184295    0.570427    0.618416    11.00000    0.10546    0.03888 =
         0.04447    0.00584    0.02789   -0.00162
AFIX  13
H54   2    0.239597    0.571148    0.645911    11.00000   -1.20000
AFIX   0
O54   3    0.162063    0.626945    0.604346    11.00000    0.09155    0.03597 =
         0.04484    0.00507    0.01702   -0.01032
PART 1
C64A  1    0.168592    0.540465    0.532238    10.50000    0.04038
AFIX  23
H64A  2    0.191567    0.558924    0.491766    10.50000   -1.20000
H64B  2    0.187314    0.502407    0.543161    10.50000   -1.20000
AFIX   0
O64A  3    0.088371    0.541367    0.493186    10.50000    0.05799
AFIX 147
H64C  2    0.073077    0.573577    0.493642    10.50000   -1.50000
AFIX   0
PART 2
C64B  1    0.130430    0.542120    0.522711    10.50000    0.06026
AFIX  23
H64D  2    0.129341    0.501780    0.528494    10.50000   -1.20000
H64E  2    0.079137    0.556393    0.505556    10.50000   -1.20000
AFIX   0
O64B  3    0.164684    0.557859    0.457115    10.50000    0.12116
AFIX  83
H64F  2    0.136882    0.549138    0.404741    10.50000   -1.50000
AFIX   0
PART 0
C15   1    0.139179    0.445317    0.689404    11.00000    0.09102    0.02648 =
         0.04398   -0.00320    0.02341   -0.01087
AFIX  13
H15   2    0.086494    0.457791    0.672441    11.00000   -1.20000
AFIX   0
C25   1    0.157957    0.410295    0.772806    11.00000    0.09133    0.03046 =
         0.03837    0.00073    0.02511   -0.00681
AFIX  13
H25   2    0.124778    0.377480    0.758358    11.00000   -1.20000
AFIX   0
O25   3    0.145460    0.439087    0.846048    11.00000    0.11146    0.03082 =
         0.04170   -0.00191    0.03071    0.00041
AFIX 147
H25A  2    0.146309    0.472960    0.837050    11.00000   -1.50000
AFIX   0
C35   1    0.236261    0.390965    0.798941    11.00000    0.08584    0.03030 =
         0.03092    0.00009    0.01977   -0.00984
AFIX  13
H35   2    0.270150    0.423348    0.815309    11.00000   -1.20000
AFIX   0
O35   3    0.254554    0.354372    0.874309    11.00000    0.08866    0.03537 =
         0.03632    0.00574    0.02943    0.00801
AFIX 147
H35A  2    0.292806    0.336600    0.876866    11.00000   -1.50000
AFIX   0
C45   1    0.247272    0.361631    0.717967    11.00000    0.07071    0.04134 =
         0.03311   -0.00243    0.01842   -0.01086
AFIX  13
H45   2    0.217857    0.326910    0.705952    11.00000   -1.20000
AFIX   0
O45   3    0.324161    0.348748    0.742281    11.00000    0.06586    0.04913 =
         0.03492    0.00137    0.01392   -0.01745
C55   1    0.222081    0.397245    0.633873    11.00000    0.06606    0.04074 =
         0.03297   -0.00300    0.01415   -0.00934
AFIX  13
H55   2    0.256177    0.429401    0.643003    11.00000   -1.20000
AFIX   0
O55   3    0.148956    0.416381    0.615763    11.00000    0.08358    0.03752 =
         0.03427   -0.00214    0.01492   -0.00927
C65   1    0.221644    0.366021    0.547276    11.00000    0.07757    0.06297 =
         0.03049   -0.00201    0.02084   -0.00044
AFIX  23
H65A  2    0.206075    0.390981    0.494244    11.00000   -1.20000
H65B  2    0.272199    0.352588    0.554842    11.00000   -1.20000
AFIX   0
O65   3    0.171981    0.321261    0.532172    11.00000    0.09187    0.04219 =
         0.03558   -0.00690    0.02020   -0.00051
AFIX 147
H65   2    0.190907    0.293824    0.515900    11.00000   -1.50000
AFIX   0
C16   1    0.344556    0.295672    0.727000    11.00000    0.06101    0.06902 =
         0.03802   -0.01437    0.02456   -0.01588
AFIX  13
H16   2    0.299288    0.272009    0.709372    11.00000   -1.20000
AFIX   0
C26   1    0.398833    0.274352    0.815987    11.00000    0.06202    0.04422 =
         0.03806   -0.00378    0.02307   -0.01058
AFIX  13
H26   2    0.410521    0.235343    0.806682    11.00000   -1.20000
AFIX   0
O26   3    0.364845    0.275724    0.885045    11.00000    0.06049    0.04613 =
         0.03847    0.00438    0.02579   -0.00158
AFIX  83
H26A  2    0.377521    0.247841    0.918160    11.00000   -1.50000
AFIX   0
C36   1    0.469937    0.306475    0.842335    11.00000    0.05898    0.05354 =
         0.03012    0.00073    0.01776   -0.00798
AFIX  13
H36   2    0.459900    0.345669    0.852750    11.00000   -1.20000
AFIX   0
O36   3    0.521668    0.284003    0.923134    11.00000    0.06451    0.05860 =
         0.03447    0.00541    0.02124   -0.00056
AFIX  83
H36A  2    0.530658    0.251299    0.913735    11.00000   -1.50000
AFIX   0
C46   1    0.500536    0.302450    0.764787    11.00000    0.06289    0.06294 =
         0.03722    0.00238    0.02115   -0.01081
AFIX  13
H46   2    0.513530    0.263565    0.756724    11.00000   -1.20000
AFIX   0
O46   3    0.566385    0.336222    0.788158    11.00000    0.05301    0.05421 =
         0.04716    0.01267    0.02040    0.00231
C56   1    0.444687    0.323483    0.677807    11.00000    0.07082    0.12771 =
         0.03982    0.02567    0.02021   -0.00526
AFIX  13
H56   2    0.435648    0.363485    0.683033    11.00000   -1.20000
AFIX   0
O56   3    0.375951    0.292960    0.658617    11.00000    0.06434    0.12523 =
         0.03373   -0.01460    0.02140   -0.00989
C66   1    0.469696    0.311769    0.589718    11.00000    0.06071    0.14490 =
         0.08082    0.02426    0.02809    0.00323
AFIX  23
H66A  2    0.427630    0.319660    0.533624    11.00000   -1.20000
H66B  2    0.511071    0.336531    0.591187    11.00000   -1.20000
AFIX   0
O66   3    0.492211    0.257301    0.587940    11.00000    0.19511    0.13221 =
         0.10838    0.00085    0.08501    0.00354
AFIX  83
H66   2    0.475222    0.238089    0.621108    11.00000   -1.50000
AFIX   0
C17   1    0.631364    0.311928    0.783161    11.00000    0.06709    0.04768 =
         0.04157   -0.00119    0.03294    0.00048
AFIX  13
H17   2    0.622754    0.271731    0.772459    11.00000   -1.20000
AFIX   0
C27   1    0.691650    0.320530    0.873259    11.00000    0.05814    0.03682 =
         0.04130    0.00266    0.02475    0.00925
AFIX  13
H27   2    0.737646    0.302081    0.870868    11.00000   -1.20000
AFIX   0
O27   3    0.671898    0.296429    0.945691    11.00000    0.06845    0.03979 =
         0.04477    0.00797    0.02664    0.00602
AFIX  83
H27A  2    0.625494    0.294525    0.930567    11.00000   -1.50000
AFIX   0
C37   1    0.708362    0.382107    0.890254    11.00000    0.04984    0.04283 =
         0.03720   -0.00084    0.02118    0.00588
AFIX  13
H37   2    0.663235    0.401013    0.894453    11.00000   -1.20000
AFIX   0
O37   3    0.766964    0.390487    0.970458    11.00000    0.05852    0.04870 =
         0.03920    0.00070    0.02414   -0.00258
AFIX  83
H37A  2    0.806990    0.382099    0.962598    11.00000   -1.50000
AFIX   0
C47   1    0.726811    0.405007    0.809936    11.00000    0.05958    0.04138 =
         0.04663   -0.00166    0.02948    0.00336
AFIX  13
H47   2    0.775250    0.389512    0.810073    11.00000   -1.20000
AFIX   0
O47   3    0.734130    0.463209    0.823540    11.00000    0.06740    0.04119 =
         0.05969    0.00111    0.04374    0.00809
C57   1    0.666923    0.392017    0.718928    11.00000    0.06849    0.06379 =
         0.04459    0.00575    0.02611   -0.01088
AFIX  13
H57   2    0.620580    0.412617    0.714149    11.00000   -1.20000
AFIX   0
O57   3    0.651594    0.334551    0.711420    11.00000    0.07026    0.07835 =
         0.04045   -0.00627    0.02869   -0.01802
C67   1    0.692096    0.406580    0.637506    11.00000    0.09430    0.11689 =
         0.04866    0.00406    0.01898   -0.03908
AFIX  23
H67A  2    0.651626    0.399443    0.579528    11.00000   -1.20000
H67B  2    0.705873    0.445763    0.639625    11.00000   -1.20000
AFIX   0
PART 1
O67A  3    0.755084    0.372643    0.644499    10.60000    0.10981    0.16334 =
         0.07851   -0.03914    0.06871   -0.05822
AFIX  83
H67C  2    0.794080    0.391285    0.664610    10.60000   -1.50000
AFIX   0
PART 2
O67B  3    0.631017    0.404224    0.552139    10.40000    0.11769    0.13384 =
         0.04999   -0.00246    0.04102   -0.04457
AFIX  83
H67D  2    0.626836    0.372165    0.531507    10.40000   -1.50000
AFIX   0
PART 0
MOLE 2
RESI    2
PART    -1  10.25
SIMU_2 C11 > O1
SAME_2 C11 > O1
C11   1    0.474320    0.454045    1.070935    10.25000    0.08638
AFIX  33
H11A  2    0.522996    0.454263    1.118820    10.25000   -1.50000
H11B  2    0.439923    0.431415    1.090202    10.25000   -1.50000
H11C  2    0.479133    0.438941    1.014970    10.25000   -1.50000
AFIX   0
C1    1    0.444606    0.512429    1.053524    10.25000    0.10332
C6    1    0.369624    0.512305    0.979803    10.25000    0.09196
AFIX  23
H6A   2    0.346642    0.548970    0.975717    10.25000   -1.20000
H6B   2    0.336806    0.485439    0.995023    10.25000   -1.20000
AFIX   0
C8    1    0.377628    0.497522    0.888975    10.25000    0.08329
AFIX  23
H8A   2    0.396453    0.459532    0.892419    10.25000   -1.20000
H8B   2    0.327949    0.498427    0.841636    10.25000   -1.20000
AFIX   0
C4    1    0.428909    0.534837    0.860053    10.25000    0.06967
AFIX  13
H4    2    0.407322    0.572384    0.856942    10.25000   -1.20000
AFIX   0
C12   1    0.434284    0.525475    0.775877    10.25000    0.09754
C15   1    0.373150    0.505468    0.705216    10.25000    0.12055
AFIX  43
H15   2    0.328476    0.497350    0.716630    10.25000   -1.20000
AFIX   0
C17   1    0.376780    0.497321    0.618910    10.25000    0.15855
AFIX  43
H17   2    0.334734    0.483839    0.571667    10.25000   -1.20000
AFIX   0
C18   1    0.441647    0.508817    0.601471    10.25000    0.11819
O2    3    0.442361    0.502996    0.514514    10.25000    0.14402
AFIX  83
H2K   2    0.404005    0.517308    0.478013    10.25000   -1.50000
AFIX   0
C16   1    0.502214    0.527135    0.670142    10.25000    0.11645
AFIX  43
H16   2    0.547125    0.533858    0.658453    10.25000   -1.20000
AFIX   0
C14   1    0.499362    0.536260    0.758059    10.25000    0.07975
C13   1    0.564997    0.556098    0.822120    10.25000    0.13876
AFIX  23
H13A  2    0.584098    0.586725    0.794697    10.25000   -1.20000
H13B  2    0.602719    0.526636    0.836949    10.25000   -1.20000
AFIX   0
C10   1    0.554727    0.575838    0.909203    10.25000    0.12043
AFIX  23
H10A  2    0.603308    0.577086    0.958607    10.25000   -1.20000
H10B  2    0.533567    0.613252    0.900430    10.25000   -1.20000
AFIX   0
C3    1    0.503163    0.537269    0.934826    10.25000    0.07709
AFIX  13
H3    2    0.525504    0.499816    0.941569    10.25000   -1.20000
AFIX   0
C2    1    0.492776    0.551952    1.023417    10.25000    0.10051
AFIX  13
H2    2    0.465095    0.587441    1.011984    10.25000   -1.20000
AFIX   0
C7    1    0.556555    0.560352    1.108616    10.25000    0.11441
AFIX  23
H7A   2    0.578884    0.596921    1.108521    10.25000   -1.20000
H7B   2    0.595065    0.532163    1.114376    10.25000   -1.20000
AFIX   0
C9    1    0.526164    0.555776    1.186653    10.25000    0.10352
AFIX  23
H9A   2    0.528697    0.591557    1.217390    10.25000   -1.20000
H9B   2    0.554632    0.528512    1.231825    10.25000   -1.20000
AFIX   0
C5    1    0.444967    0.537301    1.142584    10.25000    0.09895
AFIX  13
H5    2    0.410439    0.569286    1.131706    10.25000   -1.20000
AFIX   0
O1    3    0.426243    0.496547    1.198685    10.25000    0.15015
AFIX  83
H1    2    0.455431    0.499234    1.252390    10.25000   -1.50000
AFIX   0

RESI    3
PART    -2  10.25
SIMU_3 O2 > C8
SAME_3 O2 > C8
O2    3    0.440935    0.555787    0.527078    10.25000    0.15148
AFIX  83
H2    2    0.480469    0.556580    0.514785    10.25000   -1.50000
AFIX   0
C16   1    0.404783    0.536673    0.660078    10.25000    0.09477
AFIX  43
H16   2    0.354153    0.544066    0.627060    10.25000   -1.20000
AFIX   0
C18   1    0.455632    0.538460    0.614027    10.25000    0.10583
C17   1    0.527958    0.525442    0.661417    10.25000    0.13803
AFIX  43
H17   2    0.563363    0.523826    0.630872    10.25000   -1.20000
AFIX   0
C15   1    0.549516    0.514646    0.753697    10.25000    0.10121
AFIX  43
H15   2    0.600373    0.507452    0.785809    10.25000   -1.20000
AFIX   0
C12   1    0.499254    0.513919    0.801538    10.25000    0.07187
C14   1    0.424632    0.524488    0.752877    10.25000    0.07238
C13   1    0.368651    0.521422    0.792083    10.25000    0.07355
AFIX  23
H13A  2    0.326401    0.500904    0.750053    10.25000   -1.20000
H13B  2    0.351101    0.559065    0.796919    10.25000   -1.20000
AFIX   0
C10   1    0.389128    0.495111    0.884079    10.25000    0.08646
AFIX  23
H10A  2    0.389688    0.454777    0.877889    10.25000   -1.20000
H10B  2    0.352121    0.504754    0.913327    10.25000   -1.20000
AFIX   0
C3    1    0.464933    0.515120    0.941726    10.25000    0.07720
AFIX  13
H3    2    0.462018    0.555911    0.945149    10.25000   -1.20000
AFIX   0
C2    1    0.490038    0.494029    1.037276    10.25000    0.08123
AFIX  13
H2A   2    0.496527    0.453688    1.031822    10.25000   -1.20000
AFIX   0
C7    1    0.446232    0.499849    1.100503    10.25000    0.09144
AFIX  23
H7A   2    0.402948    0.474896    1.082998    10.25000   -1.20000
H7B   2    0.428695    0.537955    1.101014    10.25000   -1.20000
AFIX   0
C9    1    0.502288    0.483969    1.193752    10.25000    0.12758
AFIX  23
H9A   2    0.500387    0.510436    1.240997    10.25000   -1.20000
H9B   2    0.491353    0.446930    1.211780    10.25000   -1.20000
AFIX   0
C5    1    0.577292    0.485115    1.182007    10.25000    0.10721
AFIX  13
H5    2    0.590373    0.446392    1.172973    10.25000   -1.20000
AFIX   0
O1    3    0.633939    0.505224    1.260509    10.25000    0.10984
AFIX  83
H1    2    0.672696    0.510979    1.247870    10.25000   -1.50000
AFIX   0
C1    1    0.566310    0.515236    1.092962    10.25000    0.09027
C11   1    0.564454    0.576528    1.111417    10.25000    0.08685
AFIX  33
H11A  2    0.527668    0.583834    1.141178    10.25000   -1.50000
H11B  2    0.613493    0.588472    1.151117    10.25000   -1.50000
H11C  2    0.551012    0.596622    1.053804    10.25000   -1.50000
AFIX   0
C6    1    0.621051    0.498725    1.047107    10.25000    0.07877
AFIX  23
H6A   2    0.626655    0.458400    1.050541    10.25000   -1.20000
H6B   2    0.669921    0.514919    1.081087    10.25000   -1.20000
AFIX   0
C4    1    0.519656    0.502180    0.893331    10.25000    0.06541
AFIX  13
H4    2    0.520313    0.461230    0.893829    10.25000   -1.20000
AFIX   0
C8    1    0.599348    0.516190    0.947549    10.25000    0.06078
AFIX  23
H8A   2    0.606518    0.556216    0.944693    10.25000   -1.20000
H8B   2    0.632597    0.497920    0.919523    10.25000   -1.20000
AFIX   0
PART 0

MOLE 3
RESI    0
PART 1
O1W   3    0.996861    0.469279    1.026893    10.50000    0.16429
PART 2
O3W   3    0.015483    0.531678    0.885140    10.50000    0.05227    0.22615 =
         0.24755   -0.12913    0.06710   -0.02389
PART 0
PART 1
O2WA  3    0.997729    0.415208    0.872665    10.50000    0.17369
PART 2
O2WB  3    1.027114    0.390621    0.839651    10.50000    0.08787
PART 0
PART 1
O4WA  3   -0.081288    0.525642    0.685029    10.50000    0.12605
PART 2
O4WB  3   -0.045824    0.521301    0.695823    10.50000    0.10063
PART 0
O5W   3   -0.073946    0.631099    0.756531    11.00000    0.16543
O6W   3    0.898278    0.413736    0.705972    11.00000    0.10302    0.09385 =
         0.09056    0.00050    0.03990    0.02161
O7W   3    0.956526    0.367748    0.583875    11.00000    0.06606
PART 1
O8WA  3    0.912371    0.368096    0.968516    10.70000    0.06949
PART 2
OW8B  3    0.903502    0.349688    1.009297    10.30000    0.06959
PART 0
PART    1
O9WA  3    0.556188    0.175068    0.893466    10.60000    0.10526
PART    2
O9WB  3    0.584777    0.177700    1.024554    10.40000    0.09123
PART    0
O10W  3    0.000000    0.454661    0.500000    10.50000    0.08761    0.06942 =
         0.09570    0.00000    0.01955    0.00000
O11W  3    0.882335    0.679111    0.583401    11.00000    0.17160
O12W  3    0.500000    0.131106    0.500000    10.50000    0.19963
O13W  3    0.669725    0.283190    0.564724    10.50000    0.17375

HKLF 4


REM  cu_2022kbperst_0m_a.res in C2
REM wR2 = 0.2688, GooF = S = 1.038, Restrained GooF = 1.042 for all data
REM R1 = 0.0952 for 10450 Fo > 4sig(Fo) and 0.1040 for all 11945 data
REM 950 parameters refined using 202 restraints

END

WGHT      0.1769     15.8522

REM Highest difference peak  0.775,  deepest hole -0.439,  1-sigma level  0.089
Q1    1   0.3379  0.4844  0.5490  11.00000  0.05    0.78
Q2    1   0.4572  0.6155  0.5413  11.00000  0.05    0.71
Q3    1   0.4636  0.3563  0.6015  11.00000  0.05    0.61
Q4    1   0.5000  0.1080  1.0000  10.50000  0.05    0.57
Q5    1   0.4857  0.1955  0.6341  11.00000  0.05    0.53
Q6    1  -0.0119  0.5227  0.8045  11.00000  0.05    0.51
Q7    1   0.8206  0.6100  0.6671  11.00000  0.05    0.50
Q8    1   0.4070  0.2972  0.5125  11.00000  0.05    0.50
Q9    1   0.9000  0.4602  0.6669  11.00000  0.05    0.47
Q10   1   0.5804  0.1737  1.0627  11.00000  0.05    0.46
Q11   1   0.1169  0.6295  0.5677  11.00000  0.05    0.44
Q12   1   0.9774  0.3962  0.5724  11.00000  0.05    0.43
Q13   1   0.5000  0.4422  0.5000  10.50000  0.05    0.43
Q14   1   0.0197  0.5125  0.9094  11.00000  0.05    0.42
Q15   1   0.5519  0.1871  0.8301  11.00000  0.05    0.42
Q16   1   0.9279  0.3698  1.0631  11.00000  0.05    0.39
Q17   1  -0.0595  0.4936  0.6633  11.00000  0.05    0.39
Q18   1   0.2439  0.7696  0.5557  11.00000  0.05    0.38
Q19   1   0.7663  0.6412  0.6483  11.00000  0.05    0.38
Q20   1  -0.0265  0.5916  0.8125  11.00000  0.05    0.37
Q21   1   0.4737  0.5768  0.5835  11.00000  0.05    0.37
Q22   1   0.3221  0.7105  0.4916  11.00000  0.05    0.36
Q23   1   0.1186  0.5469  0.6634  11.00000  0.05    0.35
Q24   1   0.0573  0.5558  0.4859  11.00000  0.05    0.35
Q25   1   0.8438  0.6961  0.6400  11.00000  0.05    0.34
Q26   1   0.9411  0.6621  0.6701  11.00000  0.05    0.33
Q27   1   0.4874  0.5299  0.6067  11.00000  0.05    0.31
Q28   1   0.1165  0.5284  0.4978  11.00000  0.05    0.31
Q29   1   0.5703  0.2322  0.6005  11.00000  0.05    0.30
Q30   1   0.1403  0.4991  0.6721  11.00000  0.05    0.30
Q31   1   0.5459  0.1648  0.9417  11.00000  0.05    0.29
Q32   1   0.5531  0.1382  1.0815  11.00000  0.05    0.29
Q33   1   1.0000  0.3750  0.5000  10.50000  0.05    0.29
Q34   1   0.4247  0.6030  0.5919  11.00000  0.05    0.28
Q35   1   0.9546  0.4211  0.7735  11.00000  0.05    0.28
Q36   1   0.5520  0.4387  1.3269  11.00000  0.05    0.28
Q37   1   0.3712  0.3284  0.6545  11.00000  0.05    0.27
Q38   1   0.2528  0.3664  0.9238  11.00000  0.05    0.27
Q39   1   0.5758  0.7316  0.5614  11.00000  0.05    0.27
Q40   1   0.5853  0.1888  0.9911  11.00000  0.05    0.27
;
_shelx_res_checksum   78854

_shelx_hkl_file
;
  -2   0   0  271.71   17.32
  -4   0   0   17.65    1.84
  -4   0   0   16.90    1.25
  -4   0   0   20.37    1.27
  -4   0   0   19.49    1.21
   4   0   0   18.30    1.20
   6   0   0   82.48    4.81
   6   0   0   83.80    5.62
   6   0   0   71.57    4.75
   6   0   0   76.56    4.78
   6   0   0   80.96    4.84
  -6   0   0   81.57    5.85
  -6   0   0   69.17    4.81
  -6   0   0   70.68    4.78
  -6   0   0   69.90    4.80
  -6   0   0   72.10    4.85
  -6   0   0   72.09    4.84
  -6   0   0   78.41    4.79
  -6   0   0   71.56    4.81
  -6   0   0   84.34    5.68
  -6   0   0   78.39    5.79
   8   0   0    3.39    1.25
  -8   0   0    3.53    1.28
   8   0   0    5.10    0.39
   8   0   0    4.68    1.46
   8   0   0    3.84    0.45
   8   0   0    4.46    0.48
   8   0   0    4.18    0.53
   8   0   0    4.97    0.32
  -8   0   0    3.64    0.56
  -8   0   0    4.17    0.39
  -8   0   0    5.17    0.51
  -8   0   0    4.99    1.20
  10   0   0   11.16    0.98
  10   0   0   11.92    0.90
  10   0   0   11.61    0.89
  10   0   0   10.30    0.81
  10   0   0   11.83    0.75
 -10   0   0    8.39    2.16
 -10   0   0   12.10    0.92
  10   0   0   11.43    0.80
 -10   0   0   11.08    1.01
  12   0   0   25.87    2.88
  12   0   0   22.68    1.51
  12   0   0   23.15    1.48
  12   0   0   21.21    1.50
  12   0   0   23.65    1.57
  12   0   0   23.77    1.51
  12   0   0   21.74    1.74
  12   0   0   23.31    1.46
 -12   0   0   23.97    1.80
  12   0   0   23.38    1.65
  12   0   0   21.93    1.65
  14   0   0    1.04    0.24
  14   0   0    0.73    0.47
  14   0   0    0.70    0.40
 -14   0   0    0.69    0.46
  14   0   0    0.72    0.21
  14   0   0    0.85    0.18
  14   0   0    1.03    0.12
  14   0   0    1.10    0.26
  14   0   0    0.86    0.20
 -14   0   0    1.09    0.22
  16   0   0    1.15    0.25
  16   0   0    0.76    0.47
  16   0   0    1.02    0.21
  16   0   0    1.18    0.14
  16   0   0    0.96    0.27
 -16   0   0    1.23    0.55
  16   0   0    0.49    0.51
  16   0   0    1.22    0.24
  16   0   0    1.69    0.25
  18   0   0    1.28    0.26
  18   0   0   -0.29    0.58
  18   0   0    0.74    0.24
 -18   0   0    1.83    0.69
  18   0   0    0.93    0.13
  18   0   0    0.73    0.23
  18   0   0    0.47    0.20
  18   0   0    0.46    0.25
 -18   0   0    0.85    0.28
 -20   0   0    0.28    0.34
  20   0   0    0.35    0.28
  20   0   0    0.52    0.21
  20   0   0    0.54    0.26
  20   0   0    0.43    0.11
  20   0   0    0.89    0.30
   1  -1   0   16.38    1.05
  -1  -1   0   14.90    1.04
  -1  -1   0   18.18    1.11
   1  -1   0   15.77    1.04
  -1  -1   0   15.70    1.13
   1  -1   0   16.95    1.21
  -1  -1   0   17.94    1.14
   1  -1   0   15.77    1.04
   1  -1   0   18.25    1.06
  -1  -1   0   14.64    1.05
   1  -1   0   18.75    1.26
   1  -1   0   16.17    1.06
   1   1   0   17.66    1.15
  -1   1   0   17.36    1.25
  -1   1   0   17.90    1.09
   1   1   0   15.23    1.07
  -1   1   0   17.49    1.09
   1   1   0   16.19    1.07
  -1   1   0   17.96    1.28
   1   1   0   18.07    1.16
  -1   1   0   16.40    1.08
   3  -1   0  253.64   16.28
  -3  -1   0  265.18   16.66
  -3   1   0  260.32   16.86
  -5  -1   0   45.95    3.48
  -5  -1   0   38.17    2.71
  -5  -1   0   41.29    3.40
  -5  -1   0   39.89    2.65
  -5  -1   0   38.81    2.69
  -5  -1   0   37.99    2.70
  -5  -1   0   38.01    2.67
   5  -1   0   43.24    2.65
   5  -1   0   44.98    2.66
   5  -1   0   46.13    2.69
  -5  -1   0   39.14    2.65
  -5  -1   0   38.96    2.65
   5  -1   0   46.08    2.73
   5  -1   0   48.33    3.43
   5  -1   0   46.43    2.76
  -5   1   0   46.55    3.66
   5   1   0   43.07    2.75
   5   1   0   45.47    3.37
   5   1   0   49.28    3.50
  -5   1   0   38.59    2.78
  -5   1   0   41.74    2.76
  -5   1   0   42.28    2.78
   5   1   0   43.78    2.80
  -5   1   0   47.34    3.73
   5   1   0   39.18    2.74
  -5   1   0   43.69    2.82
   5   1   0   44.60    2.77
  -5   1   0   44.42    2.78
  -5   1   0   44.64    2.77
  -7  -1   0  156.96   10.66
   7  -1   0  153.70   10.79
   7  -1   0  181.01   10.65
  -7  -1   0  173.09   10.67
  -7  -1   0  164.92   10.64
   7  -1   0  178.44   10.70
  -7  -1   0  160.00   11.71
   7  -1   0  171.17   11.83
  -7  -1   0  171.04   11.59
  -7  -1   0  180.52   11.85
  -7  -1   0  156.08   10.68
  -7  -1   0  181.55   10.60
  -7   1   0  162.78   11.93
  -7   1   0  164.34   10.67
   7   1   0  164.79   11.54
  -7   1   0  169.80   10.75
  -7   1   0  166.69   10.69
   7   1   0  170.50   10.73
  -7   1   0  175.60   10.69
   7   1   0  172.94   11.68
  -7   1   0  170.17   11.77
  -7   1   0  178.03   10.67
   7   1   0  166.96   10.62
  -7   1   0  172.66   12.37
   9  -1   0   34.18    2.22
  -9  -1   0   33.42    2.13
   9  -1   0   36.75    2.17
   9  -1   0   32.98    2.13
   9  -1   0   36.33    2.16
   9  -1   0   33.89    2.29
  -9  -1   0   32.88    2.21
  -9  -1   0   26.20    3.48
   9  -1   0   32.17    3.63
  -9  -1   0   31.29    2.17
   9  -1   0   31.48    2.10
   9  -1   0   33.74    2.22
  -9  -1   0   34.35    2.26
   9  -1   0   29.16    3.43
  -9   1   0   29.42    2.27
  -9   1   0   31.00    2.16
   9   1   0   33.52    2.19
   9   1   0   33.25    2.20
   9   1   0   35.38    2.13
   9   1   0   35.73    2.14
  -9   1   0   33.50    3.75
   9   1   0   31.42    2.07
   9   1   0   34.53    2.26
   9   1   0   30.70    3.34
  -9   1   0   33.08    2.15
  -9   1   0   33.92    2.15
  -9   1   0   34.38    3.61
  -9   1   0   26.20    3.55
  -9   1   0   33.28    2.21
  11  -1   0    3.22    0.52
 -11  -1   0    3.37    1.60
  11  -1   0    4.77    0.31
  11  -1   0    4.73    0.45
  11  -1   0    3.71    0.52
 -11  -1   0    4.17    0.56
  11  -1   0    5.14    0.42
 -11  -1   0    4.59    0.64
  11  -1   0    4.35    0.34
  11   1   0    4.10    0.32
  11   1   0    5.06    1.10
  11   1   0    4.69    0.41
  11   1   0    2.62    1.51
  11   1   0    3.77    1.37
  11   1   0    3.63    0.49
 -11   1   0    3.17    0.50
  11   1   0    4.63    0.28
  11   1   0    3.12    0.59
 -11   1   0    3.33    0.39
  11   1   0    3.10    0.50
  13  -1   0    2.83    0.34
  13  -1   0    2.96    0.37
 -13  -1   0    3.39    0.35
  13  -1   0    3.09    0.34
  13  -1   0    2.98    0.37
  13  -1   0    2.86    0.39
  13  -1   0    3.50    0.54
  13  -1   0    3.03    0.30
  13  -1   0    2.56    0.23
  13  -1   0    2.72    0.56
 -13  -1   0    3.24    0.85
  13   1   0    2.67    0.35
  13   1   0    3.33    0.83
  13   1   0    2.68    0.26
 -13   1   0    1.25    0.46
 -13   1   0    2.45    0.26
  13   1   0    2.69    0.32
  13   1   0    3.16    0.53
  13   1   0    1.75    0.30
 -13   1   0    2.26    0.58
  13   1   0    2.38    0.31
  13   1   0    2.15    0.20
  13   1   0    2.42    0.34
  15  -1   0    3.05    0.36
  15  -1   0    2.37    0.39
 -15  -1   0    3.57    0.67
  15  -1   0    2.99    0.42
  15  -1   0    3.40    0.25
  15  -1   0    2.62    0.29
  15  -1   0    1.96    0.67
  15  -1   0    2.30    0.40
  15  -1   0    1.95    0.60
  15   1   0    2.13    0.29
  15   1   0    2.28    0.39
 -15   1   0    2.76    0.64
  15   1   0    2.24    0.58
  15   1   0    2.14    0.63
  15   1   0    2.45    0.38
  15   1   0    3.28    0.40
  15   1   0    2.54    0.31
 -17  -1   0    0.49    0.55
  17  -1   0    0.58    0.26
  17  -1   0    0.41    0.51
  17  -1   0    0.67    0.25
  17  -1   0    1.03    0.25
  17  -1   0    0.56    0.65
  17  -1   0    0.37    0.20
 -17  -1   0    0.84    0.30
  17  -1   0    0.38    0.28
  17  -1   0    0.43    0.21
  17  -1   0    0.80    0.12
  17   1   0    0.59    0.20
 -17   1   0    0.51    0.59
  17   1   0   -0.59    0.64
  17   1   0    0.52    0.25
  17   1   0    0.67    0.28
  17   1   0    0.44    0.73
  17   1   0    0.58    0.27
  17   1   0    0.43    0.22
  17   1   0    0.68    0.12
  17   1   0    0.82    0.23
 -17   1   0    0.64    0.28
  19  -1   0    1.31    0.27
  19  -1   0    1.04    0.28
  19  -1   0    1.03    0.13
  19  -1   0    1.33    0.34
  19  -1   0    1.67    0.29
 -19  -1   0    0.66    0.28
 -19   1   0    0.94    0.29
  19   1   0    1.17    0.14
  19   1   0    1.22    0.27
  19   1   0    0.89    0.23
  19   1   0    0.87    0.24
  19   1   0    1.66    0.30
  21  -1   0    0.37    0.31
  21  -1   0    0.96    0.29
  21  -1   0    0.46    0.24
 -21  -1   0    0.11    0.28
  21  -1   0    0.56    0.11
 -21   1   0    0.11    0.29
  21   1   0    0.31    0.25
  21   1   0    0.51    0.11
  21   1   0    1.06    0.32
  21   1   0    0.67    0.30
  21   1   0    1.27    0.35
   0  -2   0  179.13   11.21
  -2  -2   0   29.92    1.96
   2  -2   0   32.31    2.00
   2  -2   0   29.71    1.96
   2  -2   0   29.29    1.94
  -2  -2   0   33.11    2.09
  -2  -2   0   28.47    1.95
  -2  -2   0   31.33    2.13
   2  -2   0   31.21    1.96
  -2  -2   0   30.65    2.13
  -2  -2   0   31.03    1.95
   2  -2   0   30.64    1.94
   2  -2   0   32.05    1.97
   2   2   0   27.47    1.94
  -2   2   0   31.46    2.41
   2   2   0   28.30    1.93
   2   2   0   32.77    2.09
   2   2   0   34.35    2.10
   2   2   0   28.23    1.93
  -2   2   0   33.37    2.41
   2   2   0   29.56    1.92
  -2   2   0   31.58    2.62
  -2   2   0   30.74    1.96
  -2   2   0   31.25    1.96
  -2   2   0   31.66    1.95
   4  -2   0   27.10    1.85
  -4  -2   0   34.05    1.91
  -4  -2   0   27.24    1.90
   4  -2   0   28.21    1.86
   4  -2   0   29.81    1.84
   4  -2   0   27.08    1.94
  -4  -2   0   31.32    2.42
  -4   2   0   31.52    2.14
   4   2   0   30.41    2.07
  -4   2   0   34.84    2.12
  -4   2   0   36.39    2.91
   4   2   0   34.12    2.10
  -4   2   0   33.27    2.10
  -4   2   0   27.78    2.76
   6  -2   0   38.26    2.39
   6  -2   0   32.74    2.34
   6  -2   0   36.44    2.36
   6  -2   0   42.12    3.47
  -6  -2   0   32.83    2.36
  -6  -2   0   40.61    3.28
   6  -2   0   34.06    2.47
  -6  -2   0   37.82    2.34
   6  -2   0   38.95    3.25
  -6  -2   0   38.63    2.41
   6  -2   0   38.51    2.39
  -6  -2   0   37.75    2.40
  -6  -2   0   37.86    2.32
  -6  -2   0   33.20    2.42
  -6  -2   0   39.23    3.27
   6   2   0   37.37    2.37
  -6   2   0   34.51    2.41
  -6   2   0   41.25    3.36
   6   2   0   39.88    3.10
   6   2   0   33.35    2.34
   6   2   0   40.01    2.40
   6   2   0   35.74    2.36
  -6   2   0   34.93    3.41
  -6   2   0   37.48    2.41
  -6   2   0   37.10    2.46
  -6   2   0   37.92    2.39
  -6   2   0   35.94    3.42
   6   2   0   39.84    2.43
   8  -2   0   37.86    2.41
   8  -2   0   36.32    3.58
  -8  -2   0   41.62    3.68
  -8  -2   0   38.06    3.45
  -8  -2   0   35.81    2.43
   8  -2   0   37.82    2.35
   8  -2   0   35.21    2.40
  -8  -2   0   34.30    2.52
  -8  -2   0   33.00    2.41
   8  -2   0   35.73    3.71
   8  -2   0   39.75    2.57
   8  -2   0   39.20    2.37
  -8  -2   0   32.83    2.63
   8   2   0   36.42    3.34
  -8   2   0   35.06    2.26
   8   2   0   31.54    2.42
   8   2   0   36.11    2.21
   8   2   0   33.47    2.16
   8   2   0   34.76    2.25
   8   2   0   33.81    3.32
  -8   2   0   32.14    2.34
   8   2   0   35.74    2.20
  -8   2   0   33.92    2.27
  -8   2   0   41.64    3.94
   8   2   0   33.70    2.30
  -8   2   0   34.78    2.23
  -8   2   0   29.95    3.56
  10  -2   0   27.72    1.81
  10  -2   0   28.23    1.83
 -10  -2   0   29.25    2.02
  10  -2   0   29.83    1.88
  10  -2   0   29.33    1.86
 -10  -2   0   28.73    3.32
  10  -2   0   27.78    2.01
  10  -2   0   25.52    3.40
  10  -2   0   26.93    1.93
  10  -2   0   29.49    1.95
  10  -2   0   27.85    1.79
 -10   2   0   26.14    3.40
  10   2   0   27.64    1.73
  10   2   0   27.80    1.67
 -10   2   0   22.95    1.70
  10   2   0   24.25    1.74
 -10   2   0   25.16    1.70
  10   2   0   25.62    1.59
  10   2   0   23.82    3.04
  10   2   0   27.55    1.66
 -10   2   0   22.68    1.68
 -10   2   0   22.40    1.84
  10   2   0   26.52    1.61
 -10   2   0   24.11    1.75
  12  -2   0    0.11    0.27
  12  -2   0    0.30    0.27
  12  -2   0    0.22    0.07
  12  -2   0   -0.06    0.29
  12  -2   0    0.09    0.27
  12  -2   0    0.21    0.11
 -12  -2   0    0.24    0.14
 -12  -2   0    0.24    0.34
  12  -2   0    0.21    0.15
  12  -2   0    0.13    0.20
  12   2   0    0.12    0.33
 -12   2   0    0.05    0.20
  12   2   0    0.14    0.11
  12   2   0    0.07    0.30
 -12   2   0    0.22    0.38
 -12   2   0    0.03    0.34
  12   2   0    0.34    0.16
  12   2   0    0.10    0.17
 -12   2   0   -0.26    0.40
  12   2   0    0.12    0.31
  12   2   0    0.01    0.22
  14  -2   0    5.63    0.74
  14  -2   0    7.32    0.61
 -14  -2   0    7.37    0.92
  14  -2   0    6.37    0.55
  14  -2   0    6.45    0.51
  14  -2   0    6.46    0.57
  14  -2   0    5.30    0.85
  14  -2   0    6.99    0.55
  14  -2   0    7.15    0.46
 -14  -2   0    7.01    0.54
  14   2   0    6.55    0.51
  14   2   0    5.48    0.88
  14   2   0    6.75    0.55
  14   2   0    7.21    0.46
  14   2   0    6.46    0.56
  14   2   0    6.78    0.56
  14   2   0    5.67    0.81
 -14   2   0    7.97    1.01
  14   2   0    6.98    0.58
  16  -2   0    3.26    0.47
  16  -2   0    4.15    0.50
  16  -2   0    3.56    0.40
 -16  -2   0    2.96    0.71
  16  -2   0    3.02    0.46
  16  -2   0    2.63    0.60
  16  -2   0    2.52    0.67
 -16  -2   0    3.92    0.49
  16  -2   0    3.58    0.28
  16  -2   0    3.18    0.38
  16  -2   0    4.14    0.43
  16   2   0    3.39    0.45
  16   2   0    4.27    0.47
  16   2   0    3.59    0.30
  16   2   0    4.08    0.44
 -16   2   0    4.60    0.89
  16   2   0    3.43    0.45
  16   2   0    3.26    0.37
  18  -2   0    0.13    0.20
  18  -2   0    0.04    0.22
  18  -2   0   -0.05    0.24
  18  -2   0   -0.16    0.18
  18  -2   0    0.06    0.09
 -18  -2   0    0.09    0.24
  18  -2   0   -0.21    0.53
 -18  -2   0   -0.41    0.60
  18  -2   0   -0.09    0.19
  18   2   0   -0.06    0.09
  18   2   0   -0.09    0.24
  18   2   0    0.02    0.18
 -18   2   0   -0.14    0.24
  18   2   0   -0.24    0.24
  18   2   0    0.12    0.21
 -18   2   0    0.54    0.66
  18   2   0   -0.18    0.21
  20  -2   0    0.59    0.32
  20  -2   0    0.15    0.10
  20  -2   0    0.61    0.28
  20  -2   0    0.08    0.26
  20  -2   0    0.56    0.25
 -20  -2   0   -0.07    0.38
  20  -2   0    0.20    0.24
  20   2   0    0.26    0.11
 -20   2   0    0.25    0.33
  20   2   0    0.32    0.31
  20   2   0    0.40    0.22
  20   2   0    0.23    0.28
  20   2   0    0.04    0.25
   1  -3   0   55.88    3.68
   1  -3   0   62.98    3.68
   1  -3   0   54.27    3.67
   1  -3   0   60.42    3.69
   1  -3   0   59.20    3.68
  -1   3   0   56.21    3.97
  -1   3   0   67.62    4.31
  -1   3   0   66.31    4.25
  -1   3   0   65.70    3.98
  -1   3   0   61.38    3.98
  -3  -3   0  613.70   36.66
  -3  -3   0  564.97   36.39
   3  -3   0  566.89   36.44
  -3   3   0  587.82   37.52
   5  -3   0  170.76   10.71
   5  -3   0  154.20   10.82
  -5  -3   0  167.78   11.33
  -5  -3   0  185.46   11.27
  -5  -3   0  170.79   10.76
   5  -3   0  175.73   10.75
   5  -3   0  178.88   11.56
  -5  -3   0  164.75   11.33
   5  -3   0  171.39   10.72
  -5   3   0  160.32   10.75
   5   3   0  180.56   11.26
  -5   3   0  159.81   11.78
  -5   3   0  176.18   10.80
  -5   3   0  176.04   10.75
   5   3   0  173.61   11.22
  -5   3   0  179.47   11.76
   5   3   0  162.22   10.74
  -5   3   0  155.42   10.73
  -5   3   0  190.00   11.66
   7  -3   0  100.46    6.38
   7  -3   0  111.53    7.58
   7  -3   0  109.38    6.30
  -7  -3   0   97.18    6.38
   7  -3   0  100.18    6.42
  -7  -3   0   92.56    6.41
   7  -3   0  103.58    6.34
   7  -3   0  101.79    6.49
   7  -3   0   95.51    6.32
   7  -3   0  101.71    6.29
  -7  -3   0   90.04    7.27
   7   3   0  105.83    6.38
  -7   3   0  103.14    6.47
  -7   3   0  105.37    6.41
   7   3   0   98.67    6.35
   7   3   0  101.62    7.18
  -7   3   0   97.44    6.40
   7   3   0  102.27    6.41
  -7   3   0  100.64    7.85
  -7   3   0  104.68    6.38
  -7   3   0   91.27    6.37
  -7   3   0   98.02    7.74
  -9  -3   0   14.66    1.29
   9  -3   0   18.55    1.18
   9  -3   0   18.45    1.15
   9  -3   0   16.63    2.71
   9  -3   0   18.32    1.34
  -9  -3   0   14.50    1.35
   9  -3   0   17.26    1.19
   9  -3   0   17.98    1.16
   9  -3   0   19.45    1.13
   9  -3   0   14.74    2.49
  -9  -3   0   15.81    2.23
   9  -3   0   17.60    1.43
   9  -3   0   18.99    1.28
   9  -3   0   15.13    1.11
   9  -3   0   18.63    1.27
  -9  -3   0   18.85    1.31
  -9   3   0   17.77    1.22
   9   3   0   16.29    1.16
   9   3   0   17.10    1.10
  -9   3   0   17.80    2.61
   9   3   0   14.25    2.17
  -9   3   0   18.20    1.33
  -9   3   0   18.10    3.05
   9   3   0   15.67    1.19
  -9   3   0   13.83    2.65
   9   3   0   14.96    1.11
  -9   3   0   17.39    1.17
   9   3   0   16.68    1.24
 -11  -3   0   20.39    1.49
 -11  -3   0   16.23    2.79
  11  -3   0   18.61    1.23
  11  -3   0   19.69    1.43
  11  -3   0   19.79    1.27
  11  -3   0   20.21    1.46
  11  -3   0   19.00    1.31
  11  -3   0   19.23    1.25
  11  -3   0   19.95    1.34
  11  -3   0   18.20    1.49
  11   3   0   18.05    1.44
  11   3   0   19.17    1.26
 -11   3   0   17.80    1.38
 -11   3   0   18.16    1.28
  11   3   0   19.49    1.33
  11   3   0   17.50    1.17
  11   3   0   18.39    2.46
  11   3   0   19.00    1.19
  11   3   0   20.32    1.50
 -11   3   0   17.59    1.29
  11   3   0   14.97    2.76
  11   3   0   18.65    1.24
 -13  -3   0    0.68    0.17
  13  -3   0    1.11    0.21
  13  -3   0    1.00    0.11
  13  -3   0    0.94    0.37
 -13  -3   0    0.06    0.48
  13  -3   0    0.99    0.19
  13  -3   0    1.08    0.25
  13  -3   0    0.98    0.17
  13  -3   0    1.03    0.43
  13  -3   0    1.39    0.39
  13  -3   0    1.18    0.19
  13   3   0    0.90    0.16
 -13   3   0    0.91    0.53
  13   3   0    0.90    0.22
 -13   3   0    1.05    0.27
  13   3   0    0.75    0.10
 -13   3   0    0.98    0.45
  13   3   0    0.16    0.49
  13   3   0    1.14    0.45
  13   3   0    0.57    0.20
  13   3   0    0.84    0.18
 -13   3   0    0.91    0.45
  13   3   0    1.10    0.23
  15  -3   0    1.67    0.22
  15  -3   0    1.51    0.27
  15  -3   0    1.34    0.59
  15  -3   0    1.26    0.23
  15  -3   0    1.33    0.30
  15  -3   0    2.03    0.47
  15  -3   0    1.05    0.17
 -15  -3   0    1.42    0.52
  15  -3   0    1.02    0.43
  15  -3   0    1.27    0.26
 -15   3   0    1.27    0.62
  15   3   0    1.94    0.41
  15   3   0    1.82    0.25
  15   3   0    1.70    0.25
  15   3   0    1.10    0.15
  15   3   0    1.60    0.28
  15   3   0    1.36    0.58
  15   3   0    1.46    0.21
 -17  -3   0    2.40    0.61
  17  -3   0    2.66    0.23
  17  -3   0    3.07    0.42
  17  -3   0    2.17    0.29
  17  -3   0    3.00    0.41
  17  -3   0    2.13    0.35
  17  -3   0    2.08    0.33
  17  -3   0    1.70    0.47
 -17  -3   0    2.62    0.43
  17  -3   0    2.57    0.89
  17  -3   0    2.58    0.84
  17   3   0    2.35    0.38
  17   3   0    3.19    0.47
  17   3   0    2.85    0.36
  17   3   0    2.84    0.49
  17   3   0    2.65    0.24
 -17   3   0    3.25    0.78
  17   3   0    2.51    0.29
  19  -3   0    0.09    0.18
  19  -3   0    0.57    0.10
  19  -3   0    0.50    0.72
 -19  -3   0    0.12    0.28
  19  -3   0    0.04    0.20
  19  -3   0    0.52    0.24
  19  -3   0    0.41    0.19
  19  -3   0    0.81    0.25
  19   3   0    0.26    0.28
 -19   3   0    0.38    0.27
  19   3   0    0.55    0.27
  19   3   0    0.21    0.11
  19   3   0    0.22    0.24
  19   3   0    0.21    0.22
  19   3   0    0.22    0.26
  21  -3   0    0.49    0.25
 -21  -3   0    0.22    0.26
  21  -3   0    0.23    0.11
  21  -3   0    0.34    0.26
  21  -3   0    0.42    0.29
  21  -3   0    0.42    0.32
  21   3   0    0.15    0.23
  21   3   0    0.60    0.33
  21   3   0    0.22    0.11
  21   3   0    0.61    0.55
  21   3   0    0.55    0.35
   0  -4   0  281.23   17.44
   0  -4   0  275.72   17.68
   2  -4   0  667.43   41.79
   4  -4   0  161.37    9.23
  -4  -4   0  148.77    9.24
  -4  -4   0  135.77    9.22
   4  -4   0  148.74    9.20
   4  -4   0  138.78    9.29
  -4   4   0  160.44    9.73
   4   4   0  150.42    9.97
  -4   4   0  163.58   10.61
  -4   4   0  160.21    9.70
  -4   4   0  146.53    9.69
  -4   4   0  142.98   10.63
   6  -4   0   29.73    2.18
  -6  -4   0   35.21    2.25
   6  -4   0   32.12    2.19
   6  -4   0   36.21    3.81
   6  -4   0   32.17    2.23
   6  -4   0   39.00    4.47
   6  -4   0   35.85    2.17
  -6  -4   0   33.74    2.79
   6  -4   0   36.36    2.17
   6  -4   0   35.11    2.17
  -6  -4   0   31.46    2.25
  -6  -4   0   36.58    2.25
   6  -4   0   35.49    2.28
   6   4   0   29.13    2.03
   6   4   0   29.66    2.63
  -6   4   0   34.30    4.11
   6   4   0   30.31    2.02
  -6   4   0   34.56    2.08
  -6   4   0   34.44    2.11
   6   4   0   28.88    2.04
  -6   4   0   34.29    2.15
   6   4   0   31.53    2.05
  -6   4   0   30.74    2.06
   6   4   0   33.82    2.07
  -6   4   0   32.56    2.09
  -6   4   0   31.83    3.49
  -6   4   0   31.99    2.02
  -8  -4   0   27.51    1.87
  -8  -4   0   28.51    1.90
   8  -4   0   27.64    1.78
  -8  -4   0   30.00    1.87
   8  -4   0   25.34    3.20
   8  -4   0   27.11    1.73
   8  -4   0   25.23    1.71
   8  -4   0   26.85    1.76
  -8  -4   0   24.08    2.64
   8  -4   0   27.09    1.84
   8  -4   0   26.87    1.82
   8  -4   0   21.74    2.92
   8  -4   0   27.93    1.72
   8  -4   0   27.02    1.89
   8  -4   0   27.40    2.05
  -8   4   0   24.52    1.80
  -8   4   0   25.77    1.72
   8   4   0   27.25    1.64
  -8   4   0   23.63    3.12
   8   4   0   24.51    1.81
   8   4   0   23.15    2.57
   8   4   0   24.86    1.60
  -8   4   0   24.62    1.68
   8   4   0   27.25    1.64
  -8   4   0   26.01    1.73
  -8   4   0   24.74    3.01
  -8   4   0   20.71    3.04
   8   4   0   25.68    1.68
  -8   4   0   25.30    1.68
  10  -4   0   24.36    1.63
  10  -4   0   25.13    1.78
  10  -4   0   26.52    1.70
  10  -4   0   22.90    1.84
 -10  -4   0   25.36    1.83
  10  -4   0   26.36    1.64
 -10  -4   0   28.54    1.84
  10  -4   0   26.88    1.72
  10  -4   0   24.88    1.79
  10  -4   0   26.14    1.66
 -10   4   0   24.51    1.68
 -10   4   0   22.28    1.62
 -10   4   0   15.83    4.34
  10   4   0   22.52    1.49
 -10   4   0   23.24    1.59
 -10   4   0   24.55    1.62
  10   4   0   22.72    1.70
  10   4   0   25.16    1.56
  10   4   0   23.70    1.61
  10   4   0   24.88    1.50
  10   4   0   21.60    2.83
  10   4   0   24.28    2.56
 -10   4   0   21.21    1.75
  10   4   0   24.69    1.54
  12  -4   0    0.35    0.17
 -12  -4   0    0.21    0.29
 -12  -4   0    0.46    0.40
  12  -4   0    0.20    0.15
  12  -4   0    0.33    0.19
  12  -4   0    0.12    0.12
 -12  -4   0   -0.17    1.82
  12  -4   0    0.25    0.30
  12  -4   0    0.21    0.21
  12  -4   0    0.47    0.16
 -12  -4   0    1.29    1.63
  12  -4   0    0.42    0.29
 -12  -4   0    0.32    0.16
  12  -4   0    0.40    0.31
  12  -4   0    0.27    0.08
  12   4   0    0.31    0.12
  12   4   0    0.14    0.24
  12   4   0    0.47    0.36
 -12   4   0    0.17    0.22
  12   4   0   -1.37    1.85
  12   4   0    0.26    0.15
  12   4   0    0.20    0.17
  12   4   0    0.23    0.08
 -12   4   0   -0.03    0.36
  12   4   0   -0.13    1.06
 -12   4   0    0.27    0.32
 -12   4   0    0.00    0.44
 -12   4   0    0.11    0.38
  14  -4   0    0.31    0.39
  14  -4   0    0.18    0.15
  14  -4   0    0.12    0.26
  14  -4   0    0.02    0.29
 -14  -4   0    0.11    0.38
  14  -4   0    0.54    0.20
 -14  -4   0    0.33    0.18
  14  -4   0    0.33    0.09
  14  -4   0    0.07    0.21
  14  -4   0    0.46    0.38
  14  -4   0   -0.09    0.24
  14   4   0    0.29    0.09
  14   4   0    0.15    0.44
  14   4   0    0.33    0.15
 -14   4   0    0.70    0.54
  14   4   0    0.47    0.17
 -14   4   0   -0.01    0.41
  14   4   0    0.34    0.19
  14   4   0    0.45    0.19
 -14   4   0    0.46    0.29
 -14   4   0   -0.12    0.45
  14   4   0    0.60    0.22
  16  -4   0    1.13    0.22
  16  -4   0    1.41    0.28
  16  -4   0    1.22    0.32
  16  -4   0    0.91    0.44
  16  -4   0    1.49    0.31
  16  -4   0    1.46    0.31
 -16  -4   0    0.97    0.30
  16  -4   0    0.71    0.52
  16  -4   0    0.99    0.14
  16  -4   0    1.32    0.24
 -16   4   0    3.03    1.33
  16   4   0    0.50    0.57
  16   4   0    1.25    0.26
  16   4   0    1.42    0.25
  16   4   0    1.13    0.26
  16   4   0    1.21    0.25
  16   4   0    1.10    0.21
  16   4   0    1.23    0.15
  18  -4   0    0.24    0.20
  18  -4   0    0.64    0.22
  18  -4   0    0.29    0.21
 -18  -4   0    0.00    0.23
  18  -4   0    0.17    0.23
  18  -4   0    0.17    0.09
  18  -4   0    0.12    0.19
  18  -4   0    0.39    0.57
  18   4   0    0.15    0.19
  18   4   0    0.39    0.23
  18   4   0    0.19    0.26
 -18   4   0    0.27    0.25
  18   4   0   -0.13    0.23
  18   4   0    0.17    0.10
  18   4   0    0.41    0.21
 -18   4   0   -1.44    0.75
  20  -4   0    1.09    0.48
  20  -4   0    0.42    0.11
 -20  -4   0    0.13    0.32
  20  -4   0    0.62    0.27
  20  -4   0    0.45    0.24
  20   4   0    0.76    0.23
  20   4   0    1.28    0.37
  20   4   0    0.13    0.27
  20   4   0    1.74    0.70
  20   4   0    0.44    0.29
  20   4   0    0.49    0.13
 -20   4   0    0.30    0.34
  -1  -5   0 1000.00   60.42
   1  -5   0  918.80   60.78
  -1  -5   0  973.13   60.40
   3  -5   0   76.41    4.92
  -3  -5   0   74.98    4.94
   3  -5   0   81.37    4.94
   3  -5   0   86.05    5.64
   3  -5   0   80.02    4.95
   3  -5   0   74.05    4.92
   3  -5   0   74.65    5.00
  -3  -5   0   80.60    4.92
   3  -5   0   77.82    4.93
  -3   5   0   78.98    4.98
  -3   5   0   80.95    5.75
  -3   5   0   80.54    4.96
  -3   5   0   76.10    5.87
  -3   5   0   73.01    4.95
  -3   5   0   80.98    4.99
   5  -5   0   41.44    3.56
   5  -5   0   41.48    2.66
  -5  -5   0   43.50    2.70
  -5  -5   0   37.73    2.67
   5  -5   0   45.43    2.74
   5  -5   0   45.54    2.64
  -5  -5   0   40.19    3.02
   5  -5   0   43.46    3.72
  -5  -5   0   40.37    2.70
  -5  -5   0   39.26    2.63
   5  -5   0   39.31    2.65
   5  -5   0   40.61    2.69
   5  -5   0   40.79    2.66
  -5  -5   0   43.05    2.66
   5  -5   0   43.98    2.64
  -5   5   0   41.82    3.75
   5   5   0   37.55    2.57
  -5   5   0   41.37    3.85
  -5   5   0   42.25    2.64
  -5   5   0   40.06    2.62
   5   5   0   43.90    2.85
  -5   5   0   42.65    3.58
  -5   5   0   43.40    2.64
  -5   5   0   43.85    2.67
  -5   5   0   38.44    2.58
   5   5   0   35.43    2.59
  -5   5   0   43.64    2.70
  -7  -5   0   43.52    2.85
   7  -5   0   39.40    2.72
   7  -5   0   43.22    2.70
   7  -5   0   42.57    2.68
   7  -5   0   40.52    2.74
   7  -5   0   43.68    4.00
  -7  -5   0   42.38    2.75
  -7  -5   0   38.97    3.36
  -7  -5   0   42.46    2.76
   7  -5   0   40.82    2.64
   7  -5   0   40.70    2.79
   7  -5   0   45.36    2.88
   7  -5   0   41.64    2.68
   7   5   0   43.99    3.00
  -7   5   0   37.92    2.54
   7   5   0   35.04    3.18
  -7   5   0   39.21    2.50
  -7   5   0   38.53    2.51
  -7   5   0   40.25    2.53
  -7   5   0   36.85    2.59
   7   5   0   40.87    2.46
   7   5   0   40.61    2.45
  -7   5   0   44.53    4.35
   7   5   0   34.42    2.42
   7   5   0   36.82    2.51
  -7   5   0   38.25    2.44
   7   5   0   38.56    2.48
   7   5   0   39.16    2.48
  -7   5   0   35.92    3.91
   9  -5   0   62.04    4.01
  -9  -5   0   59.92    4.06
   9  -5   0   61.57    4.06
   9  -5   0   65.02    3.88
   9  -5   0   62.92    3.89
   9  -5   0   58.69    3.86
   9  -5   0   64.64    3.95
   9  -5   0   51.28    5.43
   9  -5   0   56.67    5.74
   9  -5   0   61.18    3.98
   9  -5   0   60.73    4.18
  -9  -5   0   64.41    4.00
   9  -5   0   62.08    3.92
  -9  -5   0   62.22    4.03
  -9   5   0   57.26    3.72
   9   5   0   56.11    3.74
   9   5   0   58.23    4.42
   9   5   0   52.91    3.59
  -9   5   0   58.77    3.69
   9   5   0   56.51    3.67
   9   5   0   58.80    3.64
  -9   5   0   53.22    3.59
   9   5   0   56.91    3.62
  -9   5   0   57.79    3.82
  -9   5   0   56.51    5.46
  -9   5   0   58.87    3.69
  -9   5   0   59.52    3.73
  -9   5   0   65.05    5.96
  11  -5   0   11.96    0.76
  11  -5   0   10.77    0.73
  11  -5   0   11.90    0.86
  11  -5   0   11.43    0.95
 -11  -5   0    9.77    1.10
  11  -5   0   11.23    0.82
 -11  -5   0   10.09    1.02
  11  -5   0   11.62    0.93
  11  -5   0   12.01    0.79
  11  -5   0   11.64    1.03
  11  -5   0   10.70    0.78
 -11  -5   0   11.79    0.96
  11  -5   0   10.65    0.79
 -11   5   0   10.20    0.87
  11   5   0   12.32    0.78
  11   5   0   10.93    0.84
  11   5   0   10.75    0.77
 -11   5   0   11.12    0.84
 -11   5   0    9.83    1.05
  11   5   0    9.74    0.69
  11   5   0    7.29    2.22
  11   5   0   10.66    1.85
  11   5   0   11.10    0.71
 -11   5   0   10.49    0.94
  11   5   0   10.20    0.98
 -13  -5   0    4.04    0.66
  13  -5   0    4.29    0.40
  13  -5   0    4.00    0.45
 -13  -5   0    2.72    0.78
 -13  -5   0    3.28    0.64
  13  -5   0    3.51    0.44
  13  -5   0    3.94    0.42
  13  -5   0    4.21    0.51
  13  -5   0    3.19    0.60
  13  -5   0    3.84    0.36
  13  -5   0    4.14    0.60
  13  -5   0    4.24    0.39
  13  -5   0    3.16    0.29
 -13  -5   0    4.41    0.38
 -13   5   0    3.27    0.47
 -13   5   0    3.84    0.67
 -13   5   0    3.76    0.48
  13   5   0    4.19    0.50
  13   5   0    3.27    0.50
  13   5   0    3.79    0.66
 -13   5   0    3.38    0.76
  13   5   0    3.44    0.28
 -13   5   0    3.48    0.74
  13   5   0    4.38    0.40
  13   5   0    4.09    0.33
  15  -5   0    3.98    0.45
  15  -5   0    3.80    0.64
  15  -5   0    4.01    0.31
  15  -5   0    4.57    0.57
 -15  -5   0    4.26    0.42
  15  -5   0    4.55    0.57
 -15  -5   0    4.37    0.51
 -15  -5   0    4.34    0.66
  15  -5   0    3.73    0.47
  15  -5   0    4.09    0.45
  15  -5   0    3.99    0.44
  15  -5   0    3.77    0.40
 -15   5   0    3.33    0.75
  15   5   0    3.69    0.42
  15   5   0    3.73    0.42
  15   5   0    3.78    0.46
  15   5   0    4.12    0.38
  15   5   0    3.88    0.44
  15   5   0    4.26    0.34
  17  -5   0    0.90    0.28
  17  -5   0    0.74    0.48
  17  -5   0    0.54    0.37
  17  -5   0    0.25    0.56
  17  -5   0    1.32    0.22
  17  -5   0    0.79    0.23
  17  -5   0    1.69    0.52
 -17  -5   0    0.78    0.30
  17   5   0    0.96    0.35
  17   5   0    1.59    0.50
  17   5   0    1.00    0.30
  17   5   0    1.43    0.26
 -17   5   0    2.24    0.77
  17   5   0    1.78    0.17
 -19  -5   0    1.23    0.35
  19  -5   0    1.73    0.16
  19  -5   0    1.50    0.43
  19  -5   0    0.66    0.87
  19  -5   0    1.12    0.23
  19   5   0    1.19    0.30
  19   5   0    1.48    0.35
  19   5   0    1.91    0.21
  19   5   0    2.14    0.38
 -19   5   0    1.49    0.40
  21  -5   0    0.68    0.27
 -21  -5   0    0.04    0.27
  21  -5   0    0.18    0.24
  21   5   0    0.23    0.11
  21   5   0    0.10    0.24
  21   5   0    0.62    0.37
  21   5   0    0.53    0.33
   0  -6   0  290.57   18.57
   2  -6   0  176.13   11.93
  -2  -6   0  197.38   11.94
   2  -6   0  175.67   12.00
  -2  -6   0  213.20   11.96
  -2   6   0  220.31   14.50
   4  -6   0   50.50    3.27
  -4  -6   0   50.83    3.27
   4  -6   0   47.32    3.38
   4  -6   0   50.58    3.31
   4  -6   0   58.47    4.32
   4  -6   0   53.27    4.15
   4  -6   0   49.37    3.28
   4  -6   0   51.67    3.28
  -4  -6   0   57.34    3.32
   4  -6   0   57.89    3.34
   4  -6   0   47.74    3.27
  -4  -6   0   49.75    3.32
   4   6   0   43.99    3.15
  -4   6   0   51.23    4.22
  -4   6   0   50.47    3.20
  -4   6   0   52.38    3.23
  -4   6   0   56.57    4.13
   4   6   0   46.02    3.15
  -4   6   0   53.24    3.25
  -4   6   0   51.53    3.20
  -4   6   0   48.98    4.39
   6  -6   0   73.33    4.56
   6  -6   0   77.81    4.67
  -6  -6   0   71.36    4.64
   6  -6   0   69.94    4.57
   6  -6   0   72.46    5.77
   6  -6   0   75.16    4.56
  -6  -6   0   70.70    4.63
  -6  -6   0   74.07    4.58
  -6  -6   0   68.81    4.55
   6  -6   0   74.38    4.62
  -6  -6   0   63.49    5.03
   6  -6   0   69.26    4.55
   6  -6   0   72.95    4.63
   6  -6   0   75.83    4.60
  -6  -6   0   70.12    4.60
   6  -6   0   74.78    4.75
   6  -6   0   75.23    4.58
  -6   6   0   71.40    6.09
  -6   6   0   70.11    4.39
  -6   6   0   69.28    4.49
   6   6   0   74.92    4.76
   6   6   0   67.98    4.35
  -6   6   0   70.77    4.42
  -6   6   0   72.63    4.41
  -6   6   0   68.04    4.34
   6   6   0   68.15    4.37
   6   6   0   64.70    4.35
   6   6   0   65.00    4.34
   8  -6   0   39.98    2.51
   8  -6   0   41.72    2.61
   8  -6   0   35.17    3.97
  -8  -6   0   40.78    2.57
   8  -6   0   37.91    2.75
  -8  -6   0   35.17    3.27
   8  -6   0   36.03    2.53
  -8  -6   0   41.21    2.63
  -8  -6   0   38.91    2.62
   8  -6   0   40.11    2.50
   8  -6   0   42.34    2.66
  -8  -6   0   37.14    2.60
   8  -6   0   41.49    2.59
   8  -6   0   36.11    2.46
   8  -6   0   40.37    2.55
   8   6   0   36.75    2.42
   8   6   0   34.68    2.31
  -8   6   0   37.90    4.56
   8   6   0   37.95    2.38
  -8   6   0   33.83    2.31
  -8   6   0   30.12    3.94
  -8   6   0   37.46    2.44
  -8   6   0   37.63    2.53
  -8   6   0   34.96    2.39
  -8   6   0   38.66    2.41
   8   6   0   35.78    2.33
  -8   6   0   36.76    3.93
   8   6   0   41.43    2.94
   8   6   0   35.90    2.34
  -8   6   0   39.63    2.46
  10  -6   0    3.21    0.37
  10  -6   0    2.98    0.47
  10  -6   0    3.43    0.35
 -10  -6   0    2.49    0.49
  10  -6   0    3.22    0.31
  10  -6   0    3.46    0.39
  10  -6   0    2.96    0.48
  10  -6   0    3.86    0.29
 -10  -6   0    4.01    0.60
  10  -6   0    3.21    0.24
 -10  -6   0    1.86    1.12
 -10  -6   0    1.52    1.25
  10   6   0    3.30    0.25
 -10   6   0    3.08    0.60
  10   6   0    3.83    0.31
 -10   6   0    3.11    0.43
 -10   6   0    3.85    0.53
  10   6   0    1.62    1.25
  10   6   0    2.92    0.22
  10   6   0    3.50    0.31
  10   6   0    2.54    0.49
 -10   6   0    2.78    0.44
  10   6   0    2.26    0.96
 -10   6   0    3.30    0.50
 -10   6   0    3.15    0.23
  10   6   0    2.88    0.39
  12  -6   0    5.62    0.45
 -12  -6   0    6.05    0.66
  12  -6   0    5.72    0.47
  12  -6   0    5.32    0.38
 -12  -6   0    4.53    0.72
  12  -6   0    5.92    0.51
  12  -6   0    5.72    0.43
  12  -6   0    5.40    0.73
 -12  -6   0    4.73    0.74
  12  -6   0    5.15    0.63
  12  -6   0    5.07    0.51
  12   6   0    5.25    0.38
  12   6   0    4.80    0.38
  12   6   0    5.43    0.44
  12   6   0    4.96    0.73
 -12   6   0    5.87    0.92
 -12   6   0    4.39    0.49
 -12   6   0    4.51    0.56
 -12   6   0    4.83    0.54
  14  -6   0    0.54    0.23
  14  -6   0    0.18    0.09
  14  -6   0    0.35    0.18
  14  -6   0    0.16    0.24
  14  -6   0    0.33    0.24
  14  -6   0    0.09    0.20
  14  -6   0    0.13    0.16
 -14  -6   0    0.17    0.20
  14  -6   0    0.07    0.36
  14  -6   0    0.39    0.41
  14  -6   0    0.09    0.17
 -14  -6   0    0.44    0.25
 -14  -6   0    0.11    0.34
 -14   6   0    1.00    0.63
 -14   6   0   -0.04    0.24
  14   6   0    0.22    0.20
 -14   6   0   -0.18    0.59
  14   6   0    0.30    0.15
  14   6   0    0.39    0.18
  14   6   0    0.55    0.22
  14   6   0    0.33    0.09
 -14   6   0   -0.33    0.53
  14   6   0    0.23    0.17
 -14   6   0    0.29    0.27
  16  -6   0    0.68    0.28
  16  -6   0    0.94    0.29
  16  -6   0    0.23    0.32
 -16  -6   0    0.60    0.27
  16  -6   0    1.12    0.43
  16  -6   0    0.73    0.11
  16  -6   0    0.82    0.34
  16  -6   0    0.33    0.46
  16  -6   0    0.85    0.22
  16  -6   0    0.73    0.35
  16  -6   0    0.93    0.23
  16   6   0    1.22    0.39
  16   6   0    0.55    0.21
 -16   6   0    0.26    0.22
 -16   6   0    1.66    0.73
  16   6   0    0.71    0.25
  16   6   0    0.79    0.13
  16   6   0    0.56    0.36
  16   6   0    0.66    0.23
  18  -6   0    0.19    0.23
  18  -6   0   -0.12    0.39
  18  -6   0    0.61    0.23
  18  -6   0    0.42    0.19
  18  -6   0    0.01    0.25
  18  -6   0    0.52    0.21
 -18  -6   0    0.10    0.26
  18  -6   0    0.16    0.08
  18  -6   0    0.63    0.58
  18   6   0    0.19    0.18
  18   6   0    0.07    0.23
  18   6   0    0.13    0.27
 -18   6   0   -0.06    0.24
  18   6   0    0.45    0.22
  18   6   0   -0.37    0.28
 -20  -6   0    0.00    0.28
  20  -6   0    0.32    0.27
  20  -6   0    0.06    0.24
  20  -6   0    0.19    0.22
  20  -6   0    0.35    0.43
  20   6   0   -0.25    0.40
 -20   6   0    0.46    0.38
  20   6   0    0.14    0.13
  20   6   0    0.34    0.23
   1  -7   0  374.12   24.42
  -1  -7   0  396.93   24.61
  -1  -7   0  397.57   24.58
   3  -7   0   37.87    2.67
   3  -7   0   38.79    2.76
  -3  -7   0   37.63    2.71
  -3  -7   0   41.61    2.71
   3  -7   0   42.49    2.70
  -3  -7   0   43.85    2.68
   3  -7   0   44.66    2.70
   3  -7   0   45.32    3.52
   3  -7   0   46.82    2.72
   3  -7   0   40.21    2.78
   3  -7   0   44.22    2.71
   3  -7   0   41.61    2.72
   3  -7   0   48.02    3.62
   3  -7   0   43.01    2.69
  -3   7   0   44.46    3.45
  -3   7   0   39.99    2.68
  -3   7   0   41.28    2.64
  -3   7   0   42.17    2.67
  -3   7   0   41.78    3.57
  -3   7   0   44.54    2.69
  -3   7   0   36.60    2.60
   5  -7   0   82.80    5.55
   5  -7   0   86.53    5.55
   5  -7   0   90.31    5.57
   5  -7   0   90.55    5.54
  -5  -7   0   88.89    5.54
   5  -7   0   92.34    5.59
   5  -7   0   94.05    6.83
   5  -7   0   87.16    5.61
  -5  -7   0   84.23    5.65
   5  -7   0   82.26    5.69
   5  -7   0   87.48    5.57
   5  -7   0   87.26    6.66
  -5  -7   0   93.44    5.61
  -5   7   0   88.11    5.24
  -5   7   0   78.82    5.18
  -5   7   0   79.43    6.46
  -5   7   0   85.20    6.83
  -5   7   0   77.40    5.14
   5   7   0   80.39    5.15
  -5   7   0   90.50    6.41
   5   7   0   79.03    5.14
  -5   7   0   82.39    5.20
   7  -7   0   10.40    0.83
   7  -7   0   10.38    0.76
   7  -7   0   10.32    0.67
   7  -7   0    9.95    0.71
  -7  -7   0    9.02    0.69
   7  -7   0    9.59    0.66
  -7  -7   0    8.58    0.66
  -7  -7   0    9.62    0.80
   7  -7   0   10.97    2.09
   7  -7   0   10.62    2.00
  -7  -7   0   10.70    0.81
   7  -7   0    9.27    0.89
   7  -7   0    9.43    0.64
  -7  -7   0    9.48    0.64
   7  -7   0    8.47    0.68
   7  -7   0    9.98    0.78
  -7   7   0    8.50    0.73
  -7   7   0    8.36    0.61
  -7   7   0    9.34    0.76
  -7   7   0    7.92    0.58
  -7   7   0    9.25    0.83
  -7   7   0   10.72    1.98
  -7   7   0    9.28    0.71
  -7   7   0    9.43    2.29
  -7   7   0    8.44    0.68
  -7   7   0    8.94    2.03
   7   7   0    9.27    0.61
   7   7   0    9.94    0.64
   7   7   0    9.52    0.63
   7   7   0    8.98    0.60
  -9  -7   0    7.25    0.75
   9  -7   0    8.57    0.64
   9  -7   0    7.48    0.86
   9  -7   0    7.20    0.60
  -9  -7   0    6.87    0.76
   9  -7   0    7.38    0.52
   9  -7   0    8.73    0.72
   9  -7   0    9.06    0.75
   9  -7   0    8.57    0.60
  -9  -7   0    7.62    0.63
   9  -7   0    8.70    0.78
   9  -7   0    9.24    0.58
  -9  -7   0    5.92    1.34
  -9   7   0    7.90    0.82
   9   7   0    8.04    0.74
  -9   7   0    6.43    0.48
  -9   7   0    7.90    0.68
  -9   7   0    4.65    1.88
   9   7   0    7.16    0.52
   9   7   0    7.60    0.53
  -9   7   0    6.61    0.61
   9   7   0    6.98    0.49
   9   7   0    7.87    0.59
  -9   7   0    7.77    0.70
  -9   7   0    8.10    0.66
   9   7   0    8.08    1.16
   9   7   0    6.67    1.46
  11  -7   0   10.18    0.69
  11  -7   0    8.91    0.72
  11  -7   0    8.52    0.69
  11  -7   0    8.55    0.84
  11  -7   0   10.09    0.75
  11  -7   0    9.35    0.73
  11  -7   0    8.82    3.29
 -11  -7   0    8.97    0.86
 -11  -7   0   10.52    0.77
  11  -7   0   10.62    0.70
 -11  -7   0   10.03    0.97
 -11  -7   0   11.24    0.82
 -11  -7   0    9.28    0.69
 -11   7   0    7.22    0.75
 -11   7   0    9.48    1.01
 -11   7   0    7.86    0.71
 -11   7   0    8.18    0.55
 -11   7   0    7.53    0.94
  11   7   0    9.01    0.57
 -11   7   0   10.08    0.87
  11   7   0    9.28    0.62
  11   7   0    7.68    0.55
 -13  -7   0    0.41    0.45
  13  -7   0    0.29    0.23
 -13  -7   0    0.09    0.17
  13  -7   0    0.55    0.21
  13  -7   0   -0.08    0.21
  13  -7   0    0.15    0.08
 -13  -7   0    0.42    0.46
 -13  -7   0    0.13    0.24
  13  -7   0    0.10    0.15
 -13  -7   0   -0.01    0.27
  13  -7   0    0.23    0.22
  13  -7   0    0.02    0.35
  13  -7   0    0.30    0.36
  13  -7   0    0.30    0.17
  13  -7   0    0.38    0.18
 -13   7   0    0.44    0.28
  13   7   0    0.14    0.13
  13   7   0    0.10    0.07
 -13   7   0   -0.13    0.73
 -13   7   0    0.07    0.46
 -13   7   0   -0.28    0.26
 -13   7   0    0.75    0.60
  13   7   0   -0.02    0.15
 -13   7   0    0.18    0.29
  15  -7   0    3.29    0.45
  15  -7   0    4.09    0.55
  15  -7   0    3.85    0.28
  15  -7   0    3.57    0.54
  15  -7   0    4.10    0.43
  15  -7   0    2.77    0.64
 -15  -7   0    3.32    0.38
  15  -7   0    3.06    0.38
  15  -7   0    3.93    0.38
  15  -7   0    2.90    0.56
 -15  -7   0    4.03    0.50
  15  -7   0    3.55    0.42
  15   7   0    3.15    0.46
 -15   7   0    2.16    0.88
 -15   7   0    2.80    0.87
  15   7   0    3.95    0.28
  15   7   0    3.11    0.40
 -15   7   0    3.99    0.94
  15   7   0    3.72    0.35
  15   7   0    3.31    0.39
  15   7   0    3.38    0.42
  17  -7   0    0.46    0.10
  17  -7   0    0.79    0.20
  17  -7   0    0.44    0.19
  17  -7   0    0.39    0.51
 -17  -7   0    0.62    0.30
  17  -7   0    0.05    0.58
  17  -7   0    1.14    0.35
  17  -7   0    0.43    0.27
  17  -7   0    0.94    0.23
  17  -7   0    0.25    0.20
  17   7   0    0.59    0.25
 -17   7   0    0.59    1.02
  17   7   0    0.69    0.19
  17   7   0    0.51    0.12
  17   7   0    0.55    0.25
  17   7   0    0.83    0.26
  17   7   0    0.94    0.20
  19  -7   0    0.15    0.27
  19  -7   0    0.49    0.25
 -19  -7   0   -0.02    0.28
  19  -7   0   -0.12    0.54
  19  -7   0    0.12    0.25
  19  -7   0    0.37    0.31
  19   7   0   -0.06    0.33
  19   7   0    0.15    0.26
  19   7   0    0.56    0.39
 -19   7   0    0.43    0.30
  19   7   0    0.09    0.19
  19   7   0    0.15    0.25
  19   7   0    0.39    0.13
   0  -8   0   52.09    3.81
   0  -8   0   56.18    3.38
   0  -8   0   51.26    3.36
   0  -8   0   57.20    3.89
   0  -8   0   52.09    3.88
   0  -8   0   54.32    3.67
   0  -8   0   49.87    3.37
   0   8   0   43.84    3.54
   0   8   0   51.34    3.03
   0   8   0   47.91    2.99
   0   8   0   48.31    2.99
   0   8   0   43.81    3.00
   0   8   0   47.17    3.44
   0   8   0   48.88    3.00
   2  -8   0   96.93    6.51
   2  -8   0   89.62    5.82
   2  -8   0   89.68    5.73
   2  -8   0   89.41    5.75
   2  -8   0   93.72    5.74
   2  -8   0   80.91    6.61
   2  -8   0   92.55    5.74
   2  -8   0   93.64    6.51
  -2  -8   0   93.54    5.76
  -2  -8   0   87.37    5.74
  -2  -8   0   95.10    5.78
   2   8   0   88.80    5.48
  -2   8   0   92.78    5.56
  -2   8   0   89.39    6.24
  -2   8   0   86.38    5.54
   2   8   0   79.20    5.47
  -2   8   0   87.38    5.52
  -2   8   0   89.24    6.41
   4  -8   0   78.75    5.14
  -4  -8   0   84.70    5.18
   4  -8   0   73.69    5.25
   4  -8   0   88.76    5.16
  -4  -8   0   79.56    5.13
   4  -8   0   85.82    6.28
   4  -8   0   84.70    5.12
  -4  -8   0   73.65    5.18
   4  -8   0   85.73    6.34
  -4   8   0   76.13    4.75
  -4   8   0   79.31    6.36
  -4   8   0   68.91    4.66
  -4   8   0   77.85    4.73
  -4   8   0   68.93    6.19
  -6  -8   0   64.19    4.25
   6  -8   0   63.44    4.26
   6  -8   0   71.81    4.29
   6  -8   0   69.47    4.46
   6  -8   0   67.10    5.67
   6  -8   0   75.00    4.26
   6  -8   0   69.15    4.31
  -6  -8   0   64.30    4.34
   6  -8   0   69.97    4.36
   6  -8   0   65.70    4.33
  -6  -8   0   65.27    4.33
   6  -8   0   63.16    4.26
   6   8   0   64.36    3.96
   6   8   0   61.49    3.96
  -6   8   0   64.57    4.11
  -6   8   0   57.98    3.95
  -6   8   0   70.11    5.55
  -6   8   0   63.12    4.07
  -6   8   0   67.55    5.95
   6   8   0   64.91    3.95
   6   8   0   60.41    3.94
  -6   8   0   63.81    4.01
  -6   8   0   58.73    5.54
  -6   8   0   60.16    4.02
  -6   8   0   61.85    4.03
   6   8   0   64.31    3.99
   8  -8   0    4.26    0.49
  -8  -8   0    3.51    0.53
   8  -8   0    4.29    0.59
   8  -8   0    2.26    1.40
   8  -8   0    3.44    0.26
   8  -8   0    4.13    0.53
   8  -8   0    3.41    0.34
   8  -8   0    2.31    1.30
   8  -8   0    3.56    0.39
   8   8   0    3.22    0.27
  -8   8   0    4.30    0.61
  -8   8   0    0.64    1.57
   8   8   0    3.37    0.24
   8   8   0    3.44    0.33
  -8   8   0    3.21    0.25
   8   8   0    3.05    0.28
  -8   8   0    1.45    1.06
  -8   8   0    4.19    0.48
  -8   8   0    1.50    1.32
  -8   8   0    4.26    0.50
 -10  -8   0    6.74    0.82
  10  -8   0    6.46    0.43
  10  -8   0    5.18    0.49
 -10  -8   0    6.29    0.71
  10  -8   0    5.04    0.38
  10  -8   0    6.14    0.60
  10  -8   0    6.21    0.46
  10  -8   0    5.40    0.45
  10  -8   0    6.09    0.49
  10  -8   0    4.87    0.44
  10  -8   0    4.95    0.53
 -10  -8   0    6.65    0.53
  10   8   0    6.03    0.45
 -10   8   0    6.25    0.50
  10   8   0    6.28    0.41
 -10   8   0    4.67    0.57
 -10   8   0    6.04    0.45
 -10   8   0    5.47    0.57
 -10   8   0    5.77    0.67
 -10   8   0    5.04    0.78
  12  -8   0    5.64    0.80
  12  -8   0    6.07    0.59
  12  -8   0    7.84    0.54
  12  -8   0    8.14    0.53
  12  -8   0    7.82    0.54
  12  -8   0    6.24    0.72
  12  -8   0    8.05    0.61
  12  -8   0    5.88    0.54
  12  -8   0    5.94    0.46
  12  -8   0    6.75    0.58
  12  -8   0   -0.06    3.53
 -12  -8   0    7.62    0.55
 -12  -8   0    6.00    0.62
 -12  -8   0    7.14    0.87
 -12   8   0    6.65    0.61
 -12   8   0    5.50    0.91
 -12   8   0    5.19    0.48
  12   8   0    6.37    0.48
 -12   8   0    5.24    0.63
 -12   8   0    6.23    1.05
  12   8   0    5.24    0.39
 -12   8   0    5.65    0.77
  14  -8   0    2.33    0.42
  14  -8   0    1.11    0.66
  14  -8   0    1.52    0.43
 -14  -8   0    1.14    0.30
  14  -8   0    1.28    0.29
 -14  -8   0    1.18    0.21
  14  -8   0    1.63    0.24
  14  -8   0    1.74    0.28
  14  -8   0    1.69    0.23
  14  -8   0    1.14    0.14
 -14   8   0    1.33    0.42
  14   8   0    1.18    0.13
 -14   8   0    0.94    0.73
 -14   8   0    0.55    0.67
  14   8   0    1.56    0.20
 -14   8   0    1.07    0.34
 -14   8   0    0.91    0.58
 -16  -8   0    4.14    0.52
  16  -8   0    4.91    0.46
  16  -8   0    4.70    0.41
  16  -8   0    3.79    0.32
  16  -8   0    4.78    0.46
  16  -8   0    3.65    0.46
 -16  -8   0    5.38    0.57
  16  -8   0    4.13    0.52
  16   8   0    4.22    0.47
  16   8   0    4.28    0.32
  16   8   0    3.64    0.44
  16   8   0    4.36    0.61
  16   8   0    4.20    0.40
 -16   8   0    5.31    1.06
  18  -8   0    0.84    0.13
  18  -8   0    0.54    0.24
  18  -8   0    1.00    0.23
  18  -8   0    0.91    0.45
  18  -8   0    0.78    0.54
  18  -8   0    1.00    0.19
  18  -8   0    0.66    0.28
 -18  -8   0    0.53    0.29
 -18   8   0    0.43    0.37
  18   8   0    0.44    0.27
  18   8   0    0.38    0.27
  18   8   0    0.56    0.20
  18   8   0    0.85    0.14
  18   8   0    0.46    0.40
  20  -8   0   -0.28    0.58
  20  -8   0    0.09    0.27
 -20  -8   0    0.25    0.28
  20  -8   0    0.42    0.26
  20   8   0    0.62    0.15
  20   8   0    0.92    0.42
  20   8   0    0.09    0.27
  20   8   0    0.25    0.24
   1  -9   0   98.14    6.11
  -1  -9   0   96.27    6.13
  -1  -9   0   95.69    6.12
   1  -9   0   95.46    6.76
  -1  -9   0  100.46    6.44
   1  -9   0   96.72    6.11
  -1  -9   0   97.72    6.11
  -1  -9   0  102.19    6.39
   1  -9   0   88.69    6.87
   1  -9   0   97.53    6.12
  -1   9   0  101.63    5.77
  -1   9   0   91.91    5.75
   1   9   0   93.72    5.73
  -1   9   0   88.83    6.38
  -1   9   0   90.13    5.73
  -1   9   0   84.45    5.76
   1   9   0   97.90    5.75
  -1   9   0   94.34    5.78
  -1   9   0   85.26    6.52
   1   9   0   85.78    5.71
   1   9   0   87.45    5.71
  -3  -9   0  107.65    6.28
   3  -9   0  100.43    7.28
   3  -9   0  101.18    6.27
   3  -9   0   90.56    6.25
   3  -9   0   97.90    6.28
   3  -9   0  100.21    6.27
   3  -9   0   97.65    6.38
  -3  -9   0  107.07    6.32
   3  -9   0   98.64    7.24
  -3  -9   0  102.59    6.32
   3  -9   0   92.10    6.28
  -3   9   0   90.89    5.74
  -3   9   0   96.57    6.72
  -3   9   0   88.50    6.84
  -3   9   0   92.06    5.75
  -3   9   0   90.92    5.74
  -3   9   0   83.77    5.66
   5  -9   0    2.08    0.34
  -5  -9   0    2.89    0.38
   5  -9   0    1.84    0.23
   5  -9   0    0.80    0.94
  -5  -9   0    2.67    0.39
   5  -9   0    2.32    0.24
   5  -9   0    1.90    0.33
  -5  -9   0    2.36    0.27
   5  -9   0    2.82    0.27
  -5   9   0    1.10    0.25
  -5   9   0    1.10    0.84
  -5   9   0    0.99    1.09
  -5   9   0    1.46    0.34
  -5   9   0   -0.01    1.90
  -5   9   0    1.02    0.26
   7  -9   0   90.25    6.38
   7  -9   0  101.22    6.49
   7  -9   0  100.37    6.61
  -7  -9   0   99.88    6.36
  -7  -9   0  108.57    6.49
  -7  -9   0  106.61    6.49
   7  -9   0   98.84    6.38
   7  -9   0  102.01    6.44
   7  -9   0   93.39    8.55
   7  -9   0  106.44    6.37
   7  -9   0  102.31    6.37
  -7   9   0   90.68    5.79
  -7   9   0   90.87    5.82
   7   9   0   99.32    5.69
   7   9   0   91.61    5.67
  -7   9   0   93.04    5.88
  -7   9   0   88.34    5.68
  -7   9   0   78.99    8.79
  -7   9   0   90.70    5.77
  -7   9   0   87.31    5.67
  -7   9   0   90.22    5.75
  -7   9   0   99.05    8.64
  -7   9   0   77.57    7.75
  -9  -9   0    3.90    0.60
   9  -9   0    5.34    0.63
   9  -9   0    5.73    0.43
   9  -9   0    5.45    0.56
   9  -9   0    5.08    0.34
   9  -9   0    5.85    0.46
   9  -9   0    4.17    0.47
  -9  -9   0    4.91    0.66
  -9  -9   0    4.90    0.48
   9  -9   0    5.13    0.56
  -9   9   0    4.85    0.58
  -9   9   0    4.76    0.51
  -9   9   0    5.35    0.42
   9   9   0    4.48    0.36
  -9   9   0    4.18    0.47
  -9   9   0    4.38    0.69
  -9   9   0    5.41    0.38
  -9   9   0    4.03    0.53
   9   9   0    3.99    0.32
  -9   9   0    4.58    0.32
  11  -9   0   13.10    0.86
  11  -9   0   12.35    0.82
  11  -9   0   12.15    0.80
  11  -9   0   12.00    0.81
  11  -9   0   12.20    0.92
  11  -9   0   10.46    0.96
  11  -9   0   12.73    0.85
 -11  -9   0   10.56    0.82
  11  -9   0    9.70    3.08
 -11  -9   0   11.98    1.12
  11  -9   0   10.27    1.04
  11  -9   0   11.66    0.83
  11   9   0   11.20    0.71
 -11   9   0    8.97    0.92
 -11   9   0   11.48    1.25
 -11   9   0   10.41    0.89
 -11   9   0    9.58    0.87
 -11   9   0   10.00    0.97
  11   9   0   12.09    0.75
  11   9   0   10.36    0.69
 -11   9   0   11.16    0.74
 -11   9   0   10.94    0.70
  13  -9   0    5.07    0.39
  13  -9   0    5.20    0.69
 -13  -9   0    5.37    0.49
  13  -9   0    5.94    0.54
  13  -9   0    6.42    0.50
  13  -9   0    5.47    0.52
  13  -9   0    5.77    0.46
 -13  -9   0    5.17    0.57
  13  -9   0    6.28    0.53
 -13   9   0    4.46    0.72
 -13   9   0    4.86    1.01
  13   9   0    5.15    0.38
 -13   9   0    4.67    0.58
  13   9   0    4.46    0.33
 -13   9   0    3.81    0.86
 -13   9   0    3.86    0.60
  13   9   0    4.89    0.43
  15  -9   0    2.94    0.36
  15  -9   0    2.21    0.31
  15  -9   0    1.86    0.54
  15  -9   0    3.37    0.39
  15  -9   0    2.50    0.21
 -15  -9   0    2.85    0.45
  15  -9   0    3.27    0.39
  15  -9   0    1.98    0.45
 -15  -9   0    2.14    0.33
  15   9   0    2.35    0.32
  15   9   0    2.71    0.24
  15   9   0    2.93    0.34
  15   9   0    3.08    0.37
 -15   9   0    0.79    1.20
 -15   9   0    1.09    0.82
 -15   9   0    3.61    0.80
  15   9   0    2.83    0.34
  17  -9   0   -0.11    0.47
  17  -9   0    0.55    0.20
  17  -9   0    0.67    0.28
  17  -9   0    0.68    0.32
  17  -9   0    0.12    0.23
  17  -9   0    0.50    0.17
  17   9   0    0.29    0.11
  17   9   0    0.36    0.25
 -17   9   0    0.51    0.25
 -17   9   0    0.18    0.26
  17   9   0    0.48    0.18
  17   9   0    0.33    0.26
  19  -9   0    0.48    0.25
  19  -9   0   -0.15    0.26
 -19  -9   0    0.07    0.32
  19  -9   0   -0.17    0.25
  19  -9   0   -0.35    0.54
  19   9   0    0.03    0.28
  19   9   0   -0.11    0.28
  19   9   0   -0.05    0.19
  19   9   0    0.01    0.13
  19   9   0    0.25    0.42
   0 -10   0   50.58    3.11
   0 -10   0   48.43    4.38
   0 -10   0   49.44    3.11
   0 -10   0   47.68    3.46
   0 -10   0   49.73    3.11
   0 -10   0   42.80    3.62
   0 -10   0   51.49    3.69
   0  10   0   46.53    2.87
   0  10   0   48.92    2.84
   0  10   0   41.66    2.86
   0  10   0   42.90    2.81
   0  10   0   40.48    3.34
   0  10   0   45.64    2.82
   2 -10   0   32.55    3.06
  -2 -10   0   34.18    2.21
   2 -10   0   36.90    2.21
   2 -10   0   31.83    3.28
   2 -10   0   34.17    2.22
   2 -10   0   30.57    2.18
   2 -10   0   34.84    2.20
  -2 -10   0   33.90    2.24
  -2 -10   0   38.50    2.24
   2  10   0   27.96    1.91
  -2  10   0   31.33    2.05
  -2  10   0   33.42    2.03
   2  10   0   29.23    1.89
  -2  10   0   30.77    1.92
  -2  10   0   31.20    2.80
   2  10   0   30.08    1.90
  -2  10   0   26.33    2.88
  -2  10   0   27.24    1.88
  -2  10   0   29.56    1.96
  -4 -10   0   32.91    2.26
   4 -10   0   33.44    2.21
   4 -10   0   33.14    2.19
  -4 -10   0   34.51    2.20
   4 -10   0   33.86    3.39
  -4 -10   0   36.01    2.26
   4 -10   0   34.33    2.20
   4 -10   0   35.80    2.21
   4 -10   0   33.98    2.17
   4 -10   0   34.63    2.35
  -4  10   0   31.02    2.11
  -4  10   0   32.04    2.09
  -4  10   0   28.19    3.32
  -4  10   0   34.39    3.28
  -4  10   0   30.00    2.01
  -4  10   0   34.96    2.17
  -4  10   0   31.08    2.08
  -6 -10   0   80.68    5.34
  -6 -10   0   81.07    5.44
   6 -10   0   78.22    5.34
   6 -10   0   87.03    5.35
   6 -10   0   91.87    5.33
   6 -10   0   81.00    6.97
   6 -10   0   90.26    5.39
  -6 -10   0   80.17    5.43
   6 -10   0   89.58    5.42
  -6  10   0   83.12    5.08
  -6  10   0   80.67    4.95
  -6  10   0   78.93    4.98
  -6  10   0   76.70    5.02
  -6  10   0   77.96    4.97
  -6  10   0   77.07    4.88
  -6  10   0   74.48    4.87
  -6  10   0   65.41    6.61
  -6  10   0   80.61    6.67
   8 -10   0    6.37    0.61
  -8 -10   0    7.98    0.74
   8 -10   0    6.14    0.66
   8 -10   0    7.08    0.53
  -8 -10   0    7.47    0.72
  -8 -10   0    6.11    0.48
   8 -10   0    7.37    0.51
  -8  10   0    5.89    0.72
  -8  10   0    4.98    0.38
  -8  10   0    6.04    0.60
   8  10   0    5.36    0.39
  -8  10   0    5.86    0.61
  -8  10   0    6.11    0.43
  -8  10   0    5.20    0.51
  10 -10   0    0.78    0.16
  10 -10   0    0.93    0.28
 -10 -10   0    0.38    0.17
  10 -10   0    0.76    0.28
  10 -10   0    0.70    0.32
  10 -10   0    0.54    0.15
  10 -10   0    0.53    0.16
  10 -10   0    0.73    0.21
 -10 -10   0    0.96    0.25
  10 -10   0    0.78    0.18
 -10 -10   0    0.83    0.41
  10 -10   0    2.25    2.11
 -10 -10   0    1.03    0.42
 -10  10   0    0.51    0.09
  10  10   0    0.47    0.10
 -10  10   0    0.69    0.16
 -10  10   0    0.78    0.29
 -10  10   0    0.90    0.19
 -10  10   0    0.32    0.31
 -10  10   0    0.70    0.45
  10  10   0    0.53    0.13
 -10  10   0    0.74    0.30
 -10  10   0    0.50    0.25
  12 -10   0    6.13    0.56
  12 -10   0    5.65    0.81
  12 -10   0    5.30    0.48
 -12 -10   0    7.13    0.61
 -12 -10   0    5.09    0.50
  12 -10   0    5.83    0.52
  12 -10   0    4.81    0.74
  12 -10   0    6.35    0.41
  12 -10   0    2.80    3.71
  12 -10   0    7.27    0.59
 -12 -10   0    6.84    1.16
 -12  10   0    5.42    0.38
 -12  10   0    4.48    0.61
  12  10   0    5.79    0.45
  12  10   0    5.89    0.37
 -12  10   0    4.15    0.63
 -12  10   0    5.39    0.47
 -12  10   0    8.14    1.28
 -12  10   0    4.21    0.70
 -12  10   0    5.43    0.54
  12  10   0    5.11    0.40
  14 -10   0    1.61    0.31
  14 -10   0    1.27    0.27
 -14 -10   0    1.57    0.34
  14 -10   0    1.49    0.21
  14 -10   0    1.18    0.38
 -14 -10   0    0.77    0.56
 -14 -10   0    2.04    0.32
  14 -10   0    2.06    0.33
  14 -10   0    1.10    0.45
  14  10   0    1.42    0.24
 -14  10   0    1.31    0.35
 -14  10   0    0.75    0.37
 -14  10   0    0.78    0.66
  14  10   0    1.53    0.17
  14  10   0    1.84    0.21
 -14  10   0    1.06    0.27
 -14  10   0    1.84    0.97
 -14  10   0    1.99    0.65
  14  10   0    1.82    0.29
  16 -10   0   -0.20    0.39
  16 -10   0    0.12    0.23
  16 -10   0    0.29    0.49
  16 -10   0    0.40    0.28
  16 -10   0    0.17    0.16
  16 -10   0    0.26    0.19
  16 -10   0    0.40    0.31
 -16 -10   0   -0.01    0.25
 -16 -10   0    0.57    0.20
  16  10   0    0.08    0.25
 -16  10   0   -0.05    0.33
  16  10   0    0.00    0.21
  16  10   0    0.16    0.10
  16  10   0   -0.17    0.22
 -16  10   0   -1.05    1.47
  16  10   0    0.03    0.16
 -18 -10   0    0.31    0.32
  18 -10   0    0.23    0.24
  18 -10   0    1.07    0.57
  18 -10   0    0.64    0.22
  18 -10   0    0.02    0.41
  18 -10   0    0.36    0.28
  18  10   0    0.39    0.76
  18  10   0    0.14    0.26
  18  10   0    0.34    0.13
  18  10   0    0.10    0.29
  18  10   0    0.25    0.19
  20 -10   0    0.58    0.23
  20 -10   0    0.16    0.24
 -20 -10   0    0.17    0.29
  20 -10   0    0.53    0.56
  20  10   0    0.76    0.46
  20  10   0    0.53    0.12
  20  10   0    0.51    0.26
   1 -11   0    2.31    0.93
   1 -11   0    1.68    0.23
   1 -11   0    1.41    0.20
   1 -11   0    1.30    0.22
   1 -11   0    1.81    0.65
  -1 -11   0    1.71    0.24
   1 -11   0    0.68    0.80
  -1 -11   0    1.42    0.21
   1 -11   0    1.39    0.17
  -1 -11   0    1.32    0.24
  -1  11   0    1.08    0.16
   1  11   0    1.04    0.16
  -1  11   0    1.96    0.82
  -1  11   0    1.50    0.90
  -1  11   0    1.29    0.22
  -1  11   0    0.95    0.13
   1  11   0    0.93    0.13
   1  11   0    0.73    0.14
   3 -11   0   35.26    2.35
   3 -11   0   32.10    4.65
   3 -11   0   36.82    2.33
  -3 -11   0   34.59    2.41
   3 -11   0   37.67    2.36
   3 -11   0   38.34    3.55
  -3 -11   0   40.09    2.41
  -3 -11   0   36.77    2.37
  -3  11   0   33.52    2.19
  -3  11   0   32.10    2.17
  -3  11   0   31.10    2.12
  -3  11   0   37.48    2.27
  -3  11   0   28.12    3.34
  -3  11   0   34.79    2.21
  -3  11   0   35.43    3.31
  -3  11   0   34.27    2.23
  -5 -11   0   63.26    4.00
   5 -11   0   66.96    4.02
   5 -11   0   59.73    4.00
  -5 -11   0   64.52    4.07
  -5 -11   0   61.45    4.08
   5 -11   0   62.75    4.01
   5 -11   0   61.75    5.54
  -5  11   0   56.85    3.52
  -5  11   0   51.70    3.43
  -5  11   0   55.99    3.57
  -5  11   0   54.07    3.52
  -5  11   0   51.28    5.19
  -5  11   0   48.99    3.41
  -5  11   0   59.93    3.62
  -5  11   0   53.11    3.48
  -5  11   0   58.97    5.11
  -7 -11   0    9.65    0.74
   7 -11   0   10.34    0.77
   7 -11   0   11.24    0.76
  -7 -11   0    9.97    0.91
  -7 -11   0   10.29    0.90
   7 -11   0   11.26    0.83
   7 -11   0   11.28    0.85
   7 -11   0   12.26    0.75
  -7  11   0    9.12    0.73
  -7  11   0    9.64    0.92
  -7  11   0   10.21    0.78
  -7  11   0    9.85    0.83
  -7  11   0    9.06    0.62
  -7  11   0    9.46    0.81
  -7  11   0    9.37    0.65
   9 -11   0    7.13    0.66
   9 -11   0    8.36    0.72
   9 -11   0    7.92    0.63
   9 -11   0    8.46    0.63
   9 -11   0    7.68    2.34
  -9 -11   0    8.61    0.87
  -9 -11   0    8.17    0.84
   9 -11   0    7.77    0.76
  -9 -11   0    9.08    0.67
   9 -11   0    8.71    0.61
  -9  11   0    7.28    0.48
  -9  11   0    6.64    0.66
  -9  11   0    6.46    0.85
  -9  11   0    7.06    0.63
  -9  11   0    6.01    0.70
  -9  11   0    7.51    0.57
   9  11   0    7.26    0.50
  -9  11   0    7.12    1.09
  -9  11   0    7.51    0.74
  -9  11   0    7.35    0.52
  11 -11   0    9.38    0.68
 -11 -11   0   10.30    1.06
  11 -11   0    9.42    0.72
  11 -11   0   10.30    0.75
  11 -11   0    9.58    0.77
 -11 -11   0   10.03    0.71
  11 -11   0   10.38    0.76
 -11 -11   0    9.27    0.78
  11 -11   0    8.25    0.83
  11 -11   0   10.57    0.71
 -11 -11   0   10.33    0.86
  11 -11   0    8.35    3.01
 -11  11   0    8.41    0.88
 -11  11   0    8.71    0.78
 -11  11   0    6.96    0.78
 -11  11   0    7.97    0.53
 -11  11   0    6.60    1.11
  11  11   0    8.76    0.58
  11  11   0    7.52    0.54
 -11  11   0    7.01    0.98
 -11  11   0    7.46    0.74
 -13 -11   0    0.49    0.46
  13 -11   0    0.50    0.38
  13 -11   0    0.77    0.17
  13 -11   0    1.05    0.25
  13 -11   0   -4.49    4.18
 -13 -11   0    0.50    0.25
  13 -11   0    0.97    0.34
  13  11   0    1.17    0.16
 -13  11   0    0.77    0.12
 -13  11   0    2.21    0.96
  13  11   0    0.85    0.10
 -13  11   0   -0.60    1.17
 -13  11   0    0.44    0.73
 -13  11   0    1.28    0.28
 -13  11   0    0.53    0.35
 -13  11   0    0.66    0.33
 -15 -11   0    1.73    0.36
  15 -11   0    1.22    0.29
  15 -11   0    2.49    0.35
  15 -11   0    1.91    0.34
  15 -11   0    0.87    0.41
  15 -11   0    0.76    0.48
 -15 -11   0    1.70    0.31
 -15  11   0    2.94    0.83
  15  11   0    2.11    0.32
  15  11   0    2.01    0.23
  15  11   0    1.49    0.26
  15  11   0    1.94    0.20
 -15  11   0    0.66    0.94
  17 -11   0    0.89    0.38
  17 -11   0    0.53    0.19
  17 -11   0    0.26    0.27
  17 -11   0    0.17    0.23
  17 -11   0    0.10    0.41
  17  11   0    0.21    0.28
  17  11   0    0.36    0.17
  17  11   0    0.94    0.38
  17  11   0    0.21    0.11
 -17  11   0    0.06    0.50
  19 -11   0    0.57    0.29
 -19 -11   0    0.22    0.32
  19 -11   0    0.26    0.30
  19 -11   0    0.67    0.48
  19  11   0   -0.12    0.28
  19  11   0    0.78    0.33
  19  11   0    0.53    0.14
  19  11   0    0.89    0.48
   0 -12   0   81.53    6.05
   0 -12   0   89.86    5.32
   0 -12   0   80.73    6.12
   0 -12   0   91.75    5.32
   0 -12   0   78.22    5.32
   0 -12   0   73.35    5.92
   0 -12   0   88.83    5.80
   0  12   0   69.37    4.56
   0  12   0   67.06    5.19
   0  12   0   73.93    4.53
   0  12   0   77.39    4.62
   2 -12   0   58.35    4.50
   2 -12   0   46.94    4.31
  -2 -12   0   49.25    3.27
   2 -12   0   45.47    3.23
   2 -12   0   49.34    4.64
   2 -12   0   55.33    3.26
   2 -12   0   53.86    4.07
   2 -12   0   54.73    3.27
  -2 -12   0   48.85    3.29
  -2 -12   0   48.45    3.30
   2 -12   0   54.38    3.28
   2  12   0   41.33    2.81
  -2  12   0   44.30    2.91
  -2  12   0   50.38    2.94
   2  12   0   45.98    2.80
   2  12   0   45.03    2.82
  -2  12   0   45.19    2.80
  -2  12   0   42.61    3.86
   2  12   0   43.75    2.84
   2  12   0   44.67    2.80
  -2  12   0   40.18    2.90
  -4 -12   0   18.83    1.34
   4 -12   0   24.24    2.90
  -4 -12   0   18.07    1.31
  -4 -12   0   17.69    1.25
   4 -12   0   18.63    3.12
   4 -12   0   20.70    2.25
   4 -12   0   19.42    1.27
   4 -12   0   19.21    1.25
   4 -12   0   15.87    2.46
  -4  12   0   12.82    2.45
  -4  12   0   18.44    1.19
  -4  12   0   16.69    2.38
  -4  12   0   16.92    1.27
  -4  12   0   16.08    1.18
  -4  12   0   17.62    1.08
  -4  12   0   15.45    1.21
   6 -12   0   25.07    2.91
  -6 -12   0   23.58    1.73
   6 -12   0   24.95    1.63
   6 -12   0   21.77    1.61
   6 -12   0   31.70    3.63
   6 -12   0   24.92    1.58
  -6 -12   0   26.34    1.76
   6 -12   0   26.18    2.36
   6 -12   0   24.18    1.61
   6 -12   0   21.75    3.29
  -6 -12   0   23.80    1.60
  -6  12   0   21.27    3.07
  -6  12   0   20.86    1.51
  -6  12   0   21.73    1.58
  -6  12   0   20.65    1.35
  -6  12   0   21.12    1.42
  -6  12   0   17.43    3.23
  -6  12   0   21.00    1.32
  -6  12   0   20.17    1.46
  -6  12   0   21.23    1.48
  -8 -12   0   10.14    0.74
   8 -12   0    8.95    0.73
   8 -12   0    9.92    0.74
  -8 -12   0    7.92    0.64
  -8 -12   0    9.51    0.85
   8 -12   0    8.22    0.70
  -8 -12   0    9.71    1.17
   8 -12   0    8.08    0.63
   8 -12   0    9.62    0.67
   8 -12   0    6.13    2.11
   8 -12   0    8.65    0.75
   8 -12   0    9.68    0.67
  -8  12   0    7.69    0.68
  -8  12   0    8.35    0.74
  -8  12   0    8.20    0.80
  -8  12   0    8.57    0.79
  -8  12   0    8.12    0.55
  -8  12   0    8.30    0.91
  -8  12   0    8.66    0.59
 -10 -12   0    1.60    0.23
  10 -12   0    1.82    0.28
  10 -12   0    1.92    0.39
  10 -12   0    3.80    2.43
 -10 -12   0    2.42    0.44
 -10 -12   0    1.47    0.21
  10 -12   0    2.13    0.38
 -10 -12   0    1.54    0.50
  10 -12   0    2.20    0.36
 -10 -12   0    1.57    0.50
 -10  12   0    1.83    0.18
 -10  12   0    1.98    0.26
 -10  12   0    1.35    0.37
 -10  12   0    2.27    0.52
  10  12   0    1.81    0.17
 -10  12   0    1.39    0.34
 -10  12   0    1.72    0.24
 -10  12   0    1.52    0.60
  10  12   0    1.65    0.22
 -10  12   0    2.06    0.40
  12 -12   0   -1.30    3.41
 -12 -12   0    1.59    0.25
 -12 -12   0    0.65    0.52
  12 -12   0    1.21    0.25
 -12 -12   0    2.47    0.53
  12 -12   0    1.53    0.30
 -12 -12   0    1.18    0.29
 -12 -12   0    1.68    0.64
  12 -12   0    1.73    0.23
  12 -12   0    1.79    0.29
 -12  12   0    0.88    0.42
 -12  12   0    0.54    0.53
 -12  12   0    1.02    0.48
 -12  12   0    0.71    0.38
 -12  12   0    1.36    0.14
 -12  12   0    0.78    0.34
  12  12   0    1.29    0.16
  12  12   0    1.23    0.19
 -12  12   0    1.64    0.27
 -12  12   0    1.35    0.23
  14 -12   0    1.09    0.21
 -14 -12   0    0.95    0.34
  14 -12   0    0.73    0.31
 -14 -12   0    1.33    0.22
  14 -12   0   10.50    5.82
  14 -12   0    1.66    0.41
  14 -12   0    0.92    0.39
  14 -12   0    0.91    0.30
  14 -12   0    0.68    0.34
 -14  12   0    0.60    0.37
  14  12   0    1.15    0.13
 -14  12   0    1.04    0.28
  14  12   0    1.00    0.39
 -14  12   0    0.75    0.73
 -14  12   0    1.26    0.65
 -14  12   0    0.80    0.35
  14  12   0    0.98    0.21
  16 -12   0    0.88    0.19
  16 -12   0    0.82    0.35
 -16 -12   0    0.52    0.19
  16 -12   0    1.22    0.32
 -16 -12   0    0.38    0.28
  16 -12   0    0.68    0.43
  16 -12   0    0.51    0.24
  16  12   0    0.68    0.11
  16  12   0    0.43    0.16
 -16  12   0    0.23    0.42
  16  12   0    0.63    0.24
  18 -12   0    0.76    0.31
 -18 -12   0    0.04    0.29
  18 -12   0    0.06    0.26
  18 -12   0    0.06    0.29
  18 -12   0    0.51    0.45
  18  12   0    0.20    0.18
  18  12   0    0.36    0.15
  18  12   0    0.07    0.38
  18  12   0    0.19    0.45
  18  12   0    0.18    0.29
   1 -13   0   18.99    1.94
   1 -13   0   17.65    1.26
   1 -13   0   18.60    1.30
   1 -13   0   18.26    1.32
   1 -13   0   22.68    2.23
   1 -13   0   19.57    1.31
  -1 -13   0   21.19    1.33
   1 -13   0   19.43    2.48
  -1 -13   0   21.56    1.32
  -1  13   0   19.24    1.20
  -1  13   0   14.49    1.98
  -1  13   0   18.77    1.23
   1  13   0   17.53    1.17
  -1  13   0   17.83    1.29
  -1  13   0   16.42    1.15
  -1  13   0   16.96    1.26
   1  13   0   18.38    1.25
   1  13   0   20.26    1.18
   1  13   0   18.32    1.20
   3 -13   0    0.57    0.13
   3 -13   0    0.36    0.13
  -3 -13   0    0.40    0.23
   3 -13   0    0.30    0.18
   3 -13   0    0.03    0.59
   3 -13   0    0.53    1.61
  -3 -13   0    0.50    0.18
   3 -13   0   -0.05    0.45
   3 -13   0    0.14    0.89
  -3 -13   0    0.65    0.22
  -3  13   0    0.15    0.10
  -3  13   0    0.06    0.05
  -3  13   0    0.13    0.19
  -3  13   0   -0.48    0.77
  -3  13   0    0.20    0.20
  -3  13   0    0.26    0.27
  -3  13   0    0.27    0.20
  -3  13   0    0.79    0.83
  -5 -13   0   19.77    1.29
   5 -13   0   18.83    1.27
   5 -13   0   19.18    1.95
  -5 -13   0   21.11    1.39
  -5 -13   0   19.18    1.41
   5 -13   0   16.87    2.38
   5 -13   0   21.51    1.32
   5 -13   0   16.87    1.27
   5 -13   0   18.06    3.00
   5 -13   0   19.21    1.24
  -5  13   0   14.92    2.60
  -5  13   0   17.10    1.09
  -5  13   0   17.24    1.22
  -5  13   0   12.50    3.04
  -5  13   0   16.52    1.25
  -5  13   0   16.26    1.06
  -5  13   0   17.10    1.21
  -5  13   0   16.11    1.16
  -5  13   0   17.46    1.32
   7 -13   0   22.66    1.44
  -7 -13   0   23.16    1.65
   7 -13   0   22.69    1.45
   7 -13   0   20.65    1.49
  -7 -13   0   22.52    1.62
  -7 -13   0   22.95    1.50
  -7 -13   0   19.62    1.43
  -7 -13   0   20.63    1.45
   7 -13   0   25.21    3.66
   7 -13   0   23.52    1.48
   7 -13   0   22.21    1.48
  -7  13   0   19.67    1.24
  -7  13   0   19.54    1.34
  -7  13   0   20.52    1.42
  -7  13   0   18.52    1.43
  -7  13   0   16.95    1.26
  -7  13   0   19.11    1.21
  -7  13   0   19.30    1.53
  -7  13   0   19.30    1.52
  -9 -13   0    0.42    0.24
   9 -13   0    0.90    0.26
   9 -13   0    1.09    0.24
  -9 -13   0    1.01    0.34
   9 -13   0    0.59    0.18
  -9 -13   0    1.01    0.44
   9 -13   0    0.82    0.21
  -9 -13   0    1.17    0.42
   9 -13   0    0.69    0.24
  -9 -13   0    0.93    0.18
   9 -13   0   -0.93    1.70
   9 -13   0    0.86    0.17
   9 -13   0    1.06    0.34
  -9 -13   0    0.62    0.18
   9 -13   0    0.92    0.20
  -9 -13   0    0.78    0.23
  -9  13   0    0.88    0.38
  -9  13   0    0.75    0.20
  -9  13   0    0.64    0.17
   9  13   0    0.75    0.12
  -9  13   0    0.82    0.27
  -9  13   0    0.65    0.33
  -9  13   0    0.60    0.47
  -9  13   0    0.64    0.10
  -9  13   0    0.64    0.29
  11 -13   0    0.06    0.36
  11 -13   0   -0.13    0.24
 -11 -13   0    0.04    0.47
  11 -13   0   -0.11    0.21
 -11 -13   0   -0.04    0.25
  11 -13   0    0.01    0.20
  11 -13   0    0.03    0.26
  11 -13   0    0.01    0.25
 -11 -13   0    0.35    0.46
  11 -13   0   -0.95    2.98
 -11 -13   0   -0.02    0.23
 -11 -13   0   -0.09    0.40
 -11  13   0    0.04    0.29
 -11  13   0   -0.30    0.44
 -11  13   0    0.00    0.30
 -11  13   0    0.11    0.41
 -11  13   0    0.07    0.18
  11  13   0   -0.12    0.11
 -11  13   0   -0.08    0.09
 -11  13   0    0.04    0.29
 -11  13   0    0.06    0.23
  11  13   0    0.11    0.10
  13 -13   0    3.20    0.35
  13 -13   0    2.92    0.35
  13 -13   0    3.72    4.34
  13 -13   0    2.25    0.44
  13 -13   0    3.20    0.47
 -13 -13   0    1.74    0.59
 -13 -13   0    2.24    0.38
  13 -13   0    2.28    0.42
  13 -13   0    3.06    0.39
 -13 -13   0    3.29    0.47
  13  13   0    2.73    0.28
 -13  13   0    2.31    0.29
 -13  13   0    2.31    0.65
 -13  13   0    2.14    0.22
  13  13   0    2.74    0.21
  13  13   0    2.35    0.29
 -13  13   0    2.27    0.78
 -13  13   0    2.84    0.35
 -13  13   0    1.88    0.43
  15 -13   0    1.71    0.29
 -15 -13   0    1.32    0.23
 -15 -13   0    1.15    0.32
  15 -13   0    2.21    0.34
  15  13   0    1.71    0.21
  15  13   0    2.16    0.20
 -15  13   0    0.85    0.44
  15  13   0    1.39    0.29
  17 -13   0    0.83    0.27
  17 -13   0    1.11    0.30
 -17 -13   0    1.41    0.38
  17  13   0    1.28    0.38
  17  13   0    1.93    0.19
  17  13   0    1.17    0.21
  17  13   0    1.70    0.38
  17  13   0    1.39    0.36
  19 -13   0    1.18    0.26
  19 -13   0    1.33    0.53
  19 -13   0    0.45    0.49
  19  13   0    1.34    0.16
   0 -14   0   37.75    2.44
   0 -14   0   36.91    2.45
   0 -14   0   38.50    2.97
   0 -14   0   37.41    2.44
   0  14   0   32.49    2.10
   0  14   0   35.62    2.19
   0  14   0   30.60    2.06
   0  14   0   32.11    2.12
   2 -14   0    7.40    0.56
   2 -14   0    4.22    1.62
   2 -14   0    4.92    1.18
   2 -14   0    6.17    1.69
  -2 -14   0    6.88    0.57
  -2 -14   0    6.99    0.61
   2 -14   0    6.38    0.48
   2 -14   0    7.47    0.52
   2 -14   0    6.69    1.26
  -2 -14   0    6.50    0.58
   2  14   0    5.62    0.44
  -2  14   0    6.60    0.52
   2  14   0    5.27    0.41
  -2  14   0    5.84    0.56
  -2  14   0    6.02    1.55
   2  14   0    5.82    0.41
   2  14   0    5.77    0.50
  -2  14   0    6.24    0.61
  -2  14   0    5.42    0.37
  -2  14   0    2.97    1.38
  -2  14   0    5.55    0.40
   4 -14   0   38.16    2.39
  -4 -14   0   39.17    2.45
  -4 -14   0   40.24    2.48
   4 -14   0   34.70    2.33
   4 -14   0   34.69    3.56
   4 -14   0   41.21    4.14
   4 -14   0   32.38    2.34
  -4 -14   0   35.10    2.49
  -4  14   0   31.91    2.22
  -4  14   0   30.55    2.01
  -4  14   0   30.01    2.17
  -4  14   0   30.00    2.16
  -4  14   0   30.83    3.72
  -4  14   0   34.60    2.09
  -4  14   0   33.52    2.13
  -4  14   0   31.41    2.00
   6 -14   0   11.04    0.76
  -6 -14   0   10.09    0.74
  -6 -14   0   11.94    0.80
  -6 -14   0   11.47    0.97
  -6 -14   0   10.74    0.92
  -6 -14   0   11.16    0.87
   6 -14   0   11.61    0.82
   6 -14   0   10.43    0.78
  -6 -14   0   12.40    0.84
  -6 -14   0    9.57    0.76
   6 -14   0   10.74    0.80
  -6  14   0    9.40    0.81
  -6  14   0    9.67    0.84
  -6  14   0    8.68    0.83
  -6  14   0    9.20    0.61
  -6  14   0    9.23    0.93
  -6  14   0    8.41    0.66
  -6  14   0    9.56    0.64
  -6  14   0    9.88    0.81
   8 -14   0    0.31    0.21
  -8 -14   0    0.02    0.36
   8 -14   0   -0.07    0.28
  -8 -14   0    0.03    0.10
  -8 -14   0    0.11    0.16
   8 -14   0    0.06    0.17
   8 -14   0   -1.37    1.44
  -8 -14   0    0.11    0.21
  -8 -14   0    0.04    0.19
   8 -14   0    0.03    0.15
  -8 -14   0   -0.06    0.11
  -8 -14   0    0.51    0.41
   8 -14   0   -0.09    0.15
   8 -14   0    0.07    0.18
  -8 -14   0   -0.48    0.32
  -8  14   0    0.00    0.07
  -8  14   0    0.36    0.31
  -8  14   0   -0.05    0.14
  -8  14   0    0.20    0.20
  -8  14   0    0.37    0.43
  -8  14   0   -0.06    0.25
  -8  14   0   -0.07    0.24
  -8  14   0    0.04    0.17
 -10 -14   0    3.41    0.61
  10 -14   0    2.27    0.30
  10 -14   0    2.71    0.32
  10 -14   0    2.64    0.34
 -10 -14   0    2.28    0.34
 -10 -14   0    2.44    0.35
 -10 -14   0    2.76    0.79
  10 -14   0    3.02    0.51
 -10 -14   0    3.03    0.66
  10 -14   0    1.75    2.60
 -10  14   0    2.22    0.27
 -10  14   0    2.19    0.65
  10  14   0    1.86    0.24
 -10  14   0    2.29    0.32
 -10  14   0    2.75    0.59
 -10  14   0    1.91    0.44
 -10  14   0    1.71    0.46
 -10  14   0    2.47    0.43
 -10  14   0    2.50    0.21
  12 -14   0    4.08    3.27
  12 -14   0    0.21    0.17
  12 -14   0    0.29    0.34
  12 -14   0   -0.12    0.24
 -12 -14   0    0.11    0.26
 -12 -14   0    0.09    0.41
 -12 -14   0    0.06    0.47
  12 -14   0    0.36    0.23
  12 -14   0    0.30    0.22
  12 -14   0   -0.06    0.24
 -12 -14   0    0.01    0.20
  12  14   0   -0.03    0.11
 -12  14   0    0.08    0.21
 -12  14   0   -0.51    0.39
 -12  14   0    0.09    0.10
 -12  14   0    0.07    0.30
  12  14   0    0.04    0.13
 -12  14   0    0.30    0.25
 -12  14   0    0.04    0.55
 -12  14   0    0.53    0.46
 -12  14   0   -0.09    0.32
  14 -14   0    0.71    0.21
  14 -14   0    0.19    0.22
 -14 -14   0    0.67    0.48
  14 -14   0    1.97    0.64
  14 -14   0    0.33    0.38
  14 -14   0    0.16    5.15
  14 -14   0    0.64    0.28
 -14 -14   0    0.63    0.20
  14  14   0    0.65    0.15
 -14  14   0    0.49    0.47
  14  14   0    0.22    0.23
  14  14   0    0.58    0.10
 -14  14   0    0.33    0.10
 -14  14   0    0.01    0.38
 -14  14   0    0.72    0.68
 -14  14   0    0.38    0.65
  14  14   0   -0.02    0.16
  16 -14   0    2.71    0.34
 -16 -14   0    2.94    0.33
  16  14   0    1.99    0.31
  16  14   0    1.61    0.18
 -16  14   0    0.72    0.51
  16  14   0    1.41    0.20
  18 -14   0    0.71    0.48
  18 -14   0    0.54    0.32
 -18 -14   0    0.20    0.28
  18 -14   0    0.89    0.21
  18  14   0    0.06    0.48
   1 -15   0   13.77    1.07
   1 -15   0   12.88    1.68
  -1 -15   0   15.20    1.07
  -1 -15   0   13.57    1.01
  -1 -15   0   16.26    1.05
   1 -15   0   16.43    1.20
   1 -15   0   15.69    1.91
   1 -15   0   13.28    0.98
  -1 -15   0   15.65    1.03
   1 -15   0   15.03    1.01
  -1 -15   0   16.91    1.29
   1 -15   0   13.42    1.02
  -1 -15   0   13.58    0.97
   1 -15   0   14.63    1.03
  -1  15   0    9.39    1.70
   1  15   0   13.24    0.83
  -1  15   0   12.29    0.89
   1  15   0   13.13    0.86
  -1  15   0   11.30    0.94
   1  15   0   11.44    0.78
  -1  15   0   11.31    0.79
  -1  15   0   12.53    0.97
   1  15   0   12.88    0.93
   3 -15   0    4.64    1.77
   3 -15   0    4.65    1.29
   3 -15   0    7.22    1.61
  -3 -15   0    6.96    0.52
  -3 -15   0    6.37    0.61
  -3 -15   0    6.07    0.61
   3 -15   0    5.87    0.45
   3 -15   0    6.91    0.53
  -3 -15   0    5.36    0.47
   3 -15   0    2.31    2.03
   3 -15   0    5.60    0.51
  -3 -15   0    6.89    0.52
   3 -15   0    5.45    0.60
  -3 -15   0    5.88    0.46
   3 -15   0    5.89    0.48
   3 -15   0    5.40    0.48
  -3 -15   0    6.20    0.58
  -3  15   0    5.35    0.68
  -3  15   0    5.01    0.39
  -3  15   0    5.32    0.47
  -3  15   0    5.86    0.64
   3  15   0    5.28    0.38
  -3  15   0    4.79    1.59
  -3  15   0    2.80    1.76
  -3  15   0    5.21    0.53
   5 -15   0    8.26    0.62
   5 -15   0    8.01    0.63
   5 -15   0    8.11    0.66
  -5 -15   0    8.44    0.77
   5 -15   0    8.84    0.61
  -5 -15   0    8.93    0.70
   5 -15   0    5.42    1.65
   5 -15   0    8.42    0.67
   5 -15   0    8.79    0.74
   5 -15   0    7.60    0.64
  -5 -15   0    9.27    0.82
  -5 -15   0    8.62    0.65
  -5  15   0    7.15    0.48
  -5  15   0    7.19    0.69
  -5  15   0    8.33    0.64
  -5  15   0    6.58    0.68
  -5  15   0    7.05    0.52
  -5  15   0    6.98    0.80
  -5  15   0    7.45    0.61
  -5  15   0    6.61    0.71
   7 -15   0    0.32    0.16
  -7 -15   0    0.58    0.23
  -7 -15   0    0.71    0.41
   7 -15   0    0.50    0.22
  -7 -15   0    0.42    0.36
  -7 -15   0    0.36    0.17
  -7 -15   0    0.48    0.17
   7 -15   0    0.22    1.39
   7 -15   0    0.42    0.33
   7 -15   0    0.25    0.15
   7 -15   0    0.47    0.17
  -7 -15   0    0.63    0.26
   7 -15   0    0.13    0.20
  -7 -15   0    0.04    0.33
  -7 -15   0    0.36    0.13
  -7  15   0    0.26    0.30
  -7  15   0    0.16    0.27
  -7  15   0    0.17    0.15
  -7  15   0    0.35    0.09
  -7  15   0    0.39    0.42
  -7  15   0    0.23    0.28
  -7  15   0    0.36    0.21
  -7  15   0    0.27    0.18
  -9 -15   0    3.40    0.34
  -9 -15   0    4.36    0.50
   9 -15   0    4.35    0.41
   9 -15   0    4.67    0.42
  -9 -15   0    3.75    0.40
   9 -15   0    3.74    0.40
  -9 -15   0    3.46    0.46
   9 -15   0    4.29    0.46
   9 -15   0    2.46    2.06
   9 -15   0    3.53    0.61
  -9 -15   0    4.56    0.78
  -9 -15   0    3.79    0.67
  -9 -15   0    3.50    0.62
   9 -15   0    4.71    0.60
   9 -15   0    4.14    0.37
  -9  15   0    3.48    0.61
  -9  15   0    3.55    0.29
  -9  15   0    3.09    0.73
  -9  15   0    3.70    0.51
  -9  15   0    4.12    0.37
  -9  15   0    3.71    0.63
  -9  15   0    3.28    0.54
 -11 -15   0    1.13    0.54
 -11 -15   0    1.76    0.46
  11 -15   0    1.13    0.29
 -11 -15   0    1.79    0.35
 -11 -15   0    1.19    0.56
  11 -15   0    1.35    0.40
  11 -15   0    0.41    2.60
 -11 -15   0    2.15    0.27
  11 -15   0    1.70    0.23
  11 -15   0    1.29    0.27
  11 -15   0    1.84    0.29
  11 -15   0    1.67    0.48
 -11  15   0    1.31    0.24
 -11  15   0    0.94    0.55
  11  15   0    1.37    0.15
 -11  15   0    1.39    0.70
 -11  15   0    1.00    0.48
 -11  15   0    1.25    0.28
 -11  15   0    0.93    0.14
 -11  15   0    1.20    0.41
 -11  15   0    0.81    0.40
  13 -15   0    3.96    0.52
  13 -15   0   -2.82    3.90
 -13 -15   0    4.19    0.55
  13 -15   0    3.52    0.44
  13 -15   0    4.79    0.46
 -13  15   0    3.04    0.36
 -13  15   0    2.91    0.26
 -13  15   0    2.45    0.88
  13  15   0    4.04    0.41
 -13  15   0    2.21    0.51
 -13  15   0    3.13    0.76
  13  15   0    3.81    0.30
 -15 -15   0    0.68    0.20
  15 -15   0    0.80    0.29
 -15 -15   0    0.66    0.33
  15 -15   0    0.61    0.42
  15 -15   0    0.58    0.49
  15 -15   0    1.10    0.19
  15  15   0    0.83    0.12
 -15  15   0    0.59    0.34
 -15  15   0    0.29    0.43
  17 -15   0    0.57    0.31
  17 -15   0    0.58    0.47
  17 -15   0    0.32    0.19
 -17 -15   0    0.13    0.37
  17  15   0    0.45    0.11
  17  15   0    0.51    0.21
   0 -16   0   12.72    0.87
   0 -16   0   11.34    0.86
   0 -16   0   11.46    0.88
   0  16   0   10.30    0.68
   0  16   0   11.24    0.88
   0  16   0   10.37    0.78
   0  16   0    9.92    0.68
  -2 -16   0    7.10    0.57
  -2 -16   0    7.33    0.57
   2 -16   0    6.44    1.34
   2 -16   0    6.40    0.49
  -2 -16   0    6.47    0.50
  -2 -16   0    6.69    0.59
  -2 -16   0    6.22    0.63
  -2  16   0    6.16    0.43
  -2  16   0    7.15    0.47
  -2  16   0    7.40    0.60
   2  16   0    5.72    0.52
  -2  16   0    7.22    0.68
   2  16   0    5.48    0.58
  -2  16   0    7.92    0.72
  -4 -16   0    9.36    0.84
  -4 -16   0   10.03    0.75
   4 -16   0    9.42    0.73
  -4 -16   0    9.48    0.69
   4 -16   0   10.90    0.83
  -4 -16   0   10.16    0.88
  -4 -16   0    9.44    0.71
   4 -16   0   10.33    0.76
   4 -16   0    9.39    0.68
   4 -16   0   10.64    0.76
   4 -16   0    4.78    2.58
   4 -16   0   10.27    0.71
  -4 -16   0    9.71    0.82
   4 -16   0    7.37    1.69
  -4 -16   0    9.65    0.75
  -4 -16   0   10.70    0.79
   4 -16   0    9.72    0.69
  -4  16   0    8.95    0.59
  -4  16   0    9.53    0.72
  -4  16   0    9.26    0.90
  -4  16   0    9.29    0.63
  -4  16   0    8.61    0.83
  -4  16   0    8.48    0.78
   6 -16   0    1.39    0.21
   6 -16   0    2.19    0.34
  -6 -16   0    1.56    0.50
   6 -16   0    2.11    0.30
  -6 -16   0    1.89    0.29
  -6 -16   0    1.83    0.28
   6 -16   0    1.69    0.23
  -6 -16   0    1.49    0.20
  -6 -16   0    1.34    0.20
   6 -16   0    2.14    0.26
   6 -16   0    2.20    0.28
  -6 -16   0    2.38    0.42
  -6 -16   0    1.94    0.33
  -6 -16   0    1.66    0.44
   6 -16   0    0.76    1.38
  -6  16   0    1.23    0.47
  -6  16   0    1.42    0.40
  -6  16   0    1.35    0.19
  -6  16   0    1.40    0.37
  -6  16   0    1.33    0.21
  -6  16   0    1.26    0.14
  -6  16   0    1.11    0.36
  -6  16   0    1.35    0.29
  -8 -16   0    1.31    0.29
  -8 -16   0    1.33    0.40
   8 -16   0    0.92    0.23
   8 -16   0    1.09    0.38
  -8 -16   0    1.19    0.18
  -8 -16   0    0.78    0.50
   8 -16   0    1.89    0.42
  -8 -16   0    1.24    0.22
   8 -16   0    0.88    0.25
  -8 -16   0    1.23    0.48
   8 -16   0    0.49    1.64
   8 -16   0    1.48    0.22
  -8 -16   0    1.40    0.34
  -8  16   0    0.92    0.39
  -8  16   0    0.78    0.11
  -8  16   0    0.60    0.39
  -8  16   0    0.45    0.31
  -8  16   0    0.82    0.39
  -8  16   0    0.87    0.28
  -8  16   0    0.61    0.47
  -8  16   0    0.87    0.20
  10 -16   0    0.50    0.39
 -10 -16   0    0.25    0.61
 -10 -16   0    0.12    0.13
  10 -16   0    0.44    0.18
 -10 -16   0    0.02    0.48
 -10 -16   0    0.36    0.29
  10 -16   0    0.29    0.19
  10 -16   0   -0.11    2.03
  10 -16   0    0.23    0.16
 -10 -16   0    0.62    0.21
  10 -16   0    0.35    0.27
 -10 -16   0    0.95    0.41
 -10 -16   0   -0.02    0.23
  10 -16   0    0.45    0.21
 -10  16   0    0.21    0.49
 -10  16   0    0.54    0.45
 -10  16   0    0.37    0.32
 -10  16   0    0.48    0.65
 -10  16   0    0.20    0.33
 -10  16   0    0.24    0.19
 -10  16   0    0.24    0.10
 -10  16   0    0.46    0.23
  12 -16   0    3.12    0.36
 -12 -16   0    4.40    0.61
  12 -16   0    4.12    0.60
 -12 -16   0    4.18    0.42
  12 -16   0    4.24    0.49
 -12 -16   0    3.22    0.52
  12 -16   0    0.43    3.20
  12 -16   0    3.02    0.41
 -12  16   0    2.55    0.51
  12  16   0    3.29    0.28
 -12  16   0    2.49    0.61
 -12  16   0    2.98    0.26
 -12  16   0    3.80    0.38
 -12  16   0    2.44    0.84
 -12  16   0    2.58    0.69
 -12  16   0    2.05    0.51
  14 -16   0    1.01    0.29
  14 -16   0    2.15    8.18
 -14 -16   0    0.96    0.35
  14 -16   0    0.84    0.27
 -14 -16   0    1.00    0.21
 -14  16   0    0.43    0.47
 -14  16   0    1.50    0.29
 -14  16   0    0.81    0.12
  14  16   0    1.05    0.18
  16 -16   0    0.50    0.19
  16 -16   0    0.64    0.32
 -16 -16   0    0.39    0.34
  16  16   0    1.06    0.30
   1 -17   0    2.20    0.32
   1 -17   0    2.06    0.24
   1 -17   0    1.26    0.25
  -1 -17   0    1.41    0.25
  -1 -17   0    1.89    0.27
  -1 -17   0    2.43    0.37
  -1 -17   0    2.13    0.32
   1 -17   0    1.58    0.21
   1 -17   0    1.80    0.63
  -1  17   0    1.51    0.17
  -1  17   0    1.59    0.32
   1  17   0    1.59    0.35
  -1  17   0    1.26    0.14
  -1  17   0    1.47    0.41
  -1  17   0    1.53    0.25
   1  17   0    1.32    0.17
   1  17   0    1.79    0.29
   3 -17   0   31.42    2.22
  -3 -17   0   33.36    2.16
  -3 -17   0   35.00    2.22
   3 -17   0   33.27    2.20
   3 -17   0   34.23    2.24
   3 -17   0   29.61    5.07
  -3 -17   0   36.84    2.33
  -3 -17   0   32.95    2.27
   3 -17   0   41.55    4.60
  -3 -17   0   33.53    2.17
   3 -17   0   30.56    2.14
  -3 -17   0   35.10    2.25
  -3 -17   0   34.00    2.20
  -3 -17   0   33.37    2.25
   3 -17   0   33.05    2.17
  -3  17   0   27.19    1.70
  -3  17   0   28.86    1.81
  -3  17   0   27.19    1.86
  -3  17   0   27.55    1.97
  -3  17   0   26.27    1.95
   3  17   0   24.78    1.70
  -5 -17   0   10.44    0.87
   5 -17   0    9.67    0.71
  -5 -17   0    9.41    0.74
  -5 -17   0    9.44    0.69
   5 -17   0    9.70    0.69
   5 -17   0   10.91    0.86
  -5 -17   0    9.07    0.89
  -5 -17   0   10.48    0.96
  -5 -17   0    9.54    0.76
  -5 -17   0    9.29    0.71
   5 -17   0    9.44    0.76
  -5 -17   0   10.44    0.82
   5 -17   0    7.30    1.90
   5 -17   0    9.51    0.75
  -5  17   0    7.82    0.57
  -5  17   0    8.32    0.67
  -5  17   0    6.93    0.89
  -5  17   0    6.98    1.04
  -5  17   0    7.57    0.76
  -5  17   0    8.34    0.53
  -5  17   0    7.51    0.60
   7 -17   0    1.68    0.29
   7 -17   0    1.53    1.51
  -7 -17   0    1.74    0.27
  -7 -17   0    2.32    0.34
   7 -17   0    2.37    0.40
  -7 -17   0    1.95    0.59
   7 -17   0    1.88    0.29
  -7 -17   0    2.08    0.39
   7 -17   0    2.07    0.26
   7 -17   0    1.29    0.29
  -7 -17   0    1.80    0.27
  -7 -17   0    1.35    0.49
  -7  17   0    1.55    0.16
  -7  17   0    1.16    0.48
  -7  17   0    1.37    0.22
  -7  17   0    1.43    0.42
  -7  17   0    1.40    0.43
  -7  17   0    1.25    0.31
  -7  17   0    1.37    0.38
  -9 -17   0    0.82    0.28
  -9 -17   0    1.08    0.44
   9 -17   0    0.99    0.22
   9 -17   0    1.52    0.44
  -9 -17   0    0.61    0.15
  -9 -17   0    1.00    0.22
   9 -17   0    0.34    2.00
   9 -17   0    0.96    0.20
  -9 -17   0    0.94    0.66
  -9 -17   0    0.56    0.32
  -9 -17   0    0.37    0.49
   9 -17   0    0.79    0.24
   9 -17   0    0.72    0.27
  -9  17   0    0.39    0.38
  -9  17   0    0.65    0.42
  -9  17   0    0.51    0.20
  -9  17   0    0.90    0.41
  -9  17   0    0.76    0.24
  -9  17   0    0.38    0.49
  -9  17   0    0.77    0.13
  -9  17   0    0.54    0.34
 -11 -17   0   -0.01    0.30
 -11 -17   0    0.19    0.21
  11 -17   0   -0.17    0.26
  11 -17   0   -0.02    0.24
  11 -17   0    1.91    2.74
 -11 -17   0    0.19    0.49
  11 -17   0    0.08    0.20
 -11 -17   0   -0.34    0.41
  11 -17   0    0.49    0.41
 -11  17   0    0.05    0.32
 -11  17   0   -0.38    0.36
 -11  17   0    0.00    0.37
 -11  17   0   -0.18    0.23
 -11  17   0    0.05    0.25
 -11  17   0    0.03    0.10
 -11  17   0   -0.46    0.40
 -11  17   0   -0.29    0.56
  13 -17   0    0.70    0.24
  13 -17   0    0.24    0.25
 -13 -17   0    0.22    0.31
  13 -17   0    0.43    0.30
 -13 -17   0    0.43    0.21
 -13  17   0    0.58    0.30
  13  17   0    0.80    0.14
 -13  17   0    0.46    0.12
 -13  17   0    0.31    0.49
 -13  17   0    0.12    0.21
 -15 -17   0    0.35    0.38
  15 -17   0   -0.26    0.45
 -15  17   0    0.18    0.53
 -17 -17   0    0.29    0.36
  17 -17   0    0.68    0.40
   0 -18   0   12.26    0.96
   0 -18   0   13.76    0.97
   0 -18   0   13.07    0.90
   0 -18   0   12.79    0.93
   0 -18   0   13.75    1.04
   0  18   0   10.26    0.96
   0  18   0    9.92    0.69
   0  18   0   10.67    0.71
   0  18   0   11.02    0.85
   0  18   0   11.71    0.79
  -2 -18   0    1.94    0.28
   2 -18   0    1.90    0.22
  -2 -18   0    1.67    0.30
  -2 -18   0    1.93    0.29
   2 -18   0    0.65    1.38
   2 -18   0    2.14    0.30
   2 -18   0    1.93    0.32
   2 -18   0    1.16    0.87
  -2  18   0    1.85    0.17
  -2  18   0    2.10    0.30
  -2  18   0    1.92    0.50
   2  18   0    2.05    0.30
   2  18   0    1.72    0.25
  -2  18   0    1.97    0.21
   2  18   0    1.45    0.19
  -2  18   0    2.48    0.42
   4 -18   0    1.34    1.21
   4 -18   0    2.58    0.35
  -4 -18   0    2.47    0.33
   4 -18   0    1.95    0.27
  -4 -18   0    2.07    0.33
  -4 -18   0    2.09    0.49
   4 -18   0    2.31    0.35
  -4 -18   0    2.15    0.42
  -4 -18   0    2.21    0.38
  -4 -18   0    2.10    0.29
   4 -18   0    2.32    0.27
  -4 -18   0    1.95    0.34
   4 -18   0    2.60    0.43
  -4  18   0    1.25    0.48
  -4  18   0    1.18    0.65
  -4  18   0    1.53    0.40
  -4  18   0    1.98    0.33
  -4  18   0    1.63    0.29
  -4  18   0    1.94    0.18
  -4  18   0    1.67    0.21
   6 -18   0    6.14    0.69
  -6 -18   0    5.16    0.44
   6 -18   0    5.88    2.02
  -6 -18   0    5.80    0.59
  -6 -18   0    5.26    0.62
   6 -18   0    6.12    0.62
  -6 -18   0    4.88    0.49
  -6 -18   0    4.03    0.67
  -6 -18   0    5.02    0.81
  -6 -18   0    4.66    0.49
   6 -18   0    4.83    0.51
   6 -18   0    5.14    0.46
  -6  18   0    3.74    0.62
  -6  18   0    4.24    0.49
  -6  18   0    3.26    0.60
  -6  18   0    4.22    0.39
  -6  18   0    4.71    0.66
  -6  18   0    3.24    0.66
  -6  18   0    4.39    0.31
  -8 -18   0    0.19    0.26
  -8 -18   0   -0.37    0.44
  -8 -18   0    0.14    0.32
   8 -18   0   -0.03    0.19
  -8 -18   0    0.56    0.42
   8 -18   0   -0.11    0.23
  -8 -18   0    0.29    0.20
   8 -18   0    0.29    0.18
  -8 -18   0    0.03    0.76
  -8 -18   0    0.16    0.14
   8 -18   0    0.80    0.42
   8 -18   0    0.30    0.19
   8 -18   0    0.49    1.73
  -8  18   0    0.33    0.37
  -8  18   0    0.03    0.47
  -8  18   0    0.03    0.38
  -8  18   0    0.06    0.17
  -8  18   0    0.24    0.26
  -8  18   0    0.05    0.22
  -8  18   0    0.20    0.09
  -8  18   0   -0.01    0.31
 -10 -18   0    0.95    0.37
  10 -18   0    0.71    2.60
  10 -18   0    0.95    0.23
 -10 -18   0    0.46    0.26
  10 -18   0    0.83    0.46
  10 -18   0    0.89    0.45
 -10 -18   0    0.81    0.23
 -10 -18   0    0.63    0.15
  10 -18   0    0.57    0.26
 -10 -18   0    0.12    0.51
 -10 -18   0    1.41    0.44
  10 -18   0    0.93    0.21
 -10  18   0    0.24    0.38
 -10  18   0    0.45    0.60
 -10  18   0    0.26    0.33
 -10  18   0    0.41    0.26
 -10  18   0    0.40    0.35
 -10  18   0    0.48    0.11
 -10  18   0    0.50    0.48
 -10  18   0    0.27    0.36
 -12 -18   0    0.21    0.41
 -12 -18   0    0.33    0.33
  12 -18   0    0.55    0.44
  12 -18   0   -6.41    3.51
  12 -18   0    0.51    0.35
 -12 -18   0    0.47    0.21
  12 -18   0    0.83    0.23
  12 -18   0    0.69    0.33
 -12  18   0    0.80    0.28
 -12  18   0    0.41    0.46
 -12  18   0    0.40    0.11
 -12  18   0    0.57    0.22
  14 -18   0    0.59    0.29
 -14 -18   0    0.37    0.34
 -14 -18   0    0.44    0.20
 -14  18   0    0.18    0.10
 -14  18   0   -0.21    0.45
 -14  18   0    0.32    0.32
  16 -18   0    1.05    0.39
 -16 -18   0    0.00    0.33
   1 -19   0    6.06    0.58
   1 -19   0    6.37    0.54
   1 -19   0    5.98    0.61
   1 -19   0    7.91    0.88
  -1 -19   0    6.13    0.55
  -1 -19   0    6.33    0.65
  -1 -19   0    7.23    0.54
  -1 -19   0    5.89    0.58
   1 -19   0    6.34    0.62
  -1 -19   0    7.65    0.80
  -1  19   0    4.96    0.47
  -1  19   0    4.52    0.71
  -1  19   0    4.99    0.34
   1  19   0    5.33    0.44
  -1  19   0    4.54    0.38
   1  19   0    4.70    0.37
   1  19   0    4.71    0.36
   1  19   0    4.87    0.53
  -1  19   0    3.99    0.57
   3 -19   0    2.94    0.42
  -3 -19   0    3.07    0.40
   3 -19   0    2.94    0.29
   3 -19   0    2.96    1.20
  -3 -19   0    3.13    0.37
  -3  19   0    2.62    0.36
  -3  19   0    2.54    0.38
  -3  19   0    2.56    0.30
   3  19   0    2.67    0.29
  -3  19   0    2.81    0.61
  -3  19   0    2.40    0.46
  -3  19   0    2.37    0.22
   5 -19   0    4.47    0.52
  -5 -19   0    5.06    0.55
  -5 -19   0    5.38    0.58
   5 -19   0    3.98    1.56
   5 -19   0    4.24    0.54
  -5 -19   0    5.21    0.80
   5 -19   0    4.80    0.47
  -5 -19   0    5.57    0.49
  -5 -19   0    6.61    0.87
  -5 -19   0    6.05    0.71
   5 -19   0    5.54    0.70
   5 -19   0    4.80    0.44
  -5 -19   0    5.41    0.44
  -5  19   0    4.11    0.44
  -5  19   0    4.04    0.30
  -5  19   0    2.62    0.64
  -5  19   0    4.04    0.48
  -5  19   0    4.26    0.61
  -5  19   0    3.54    0.38
  -7 -19   0    2.41    0.44
  -7 -19   0    2.37    0.36
  -7 -19   0    1.64    0.55
  -7 -19   0    1.47    0.68
   7 -19   0    2.20    0.35
   7 -19   0    2.00    0.33
   7 -19   0    3.09    1.78
  -7 -19   0    3.37    0.62
   7 -19   0    1.83    0.25
  -7 -19   0    2.89    0.30
   7 -19   0    2.72    0.39
  -7  19   0    1.46    0.56
  -7  19   0    1.58    0.24
  -7  19   0    1.78    0.45
  -7  19   0    1.32    0.46
  -7  19   0    1.56    0.48
  -7  19   0    1.41    0.34
  -7  19   0    2.15    0.29
  -7  19   0    1.73    0.20
   9 -19   0    0.78    0.21
   9 -19   0    1.34    0.47
  -9 -19   0    0.39    0.30
  -9 -19   0    0.60    0.16
   9 -19   0    1.06    0.23
   9 -19   0    0.77    2.12
  -9 -19   0    0.95    0.44
  -9 -19   0    0.82    0.22
  -9 -19   0   -0.34    0.52
  -9 -19   0    0.66    0.36
  -9  19   0    0.61    0.34
  -9  19   0    0.33    0.57
  -9  19   0    0.47    0.23
  -9  19   0    0.05    0.37
  -9  19   0    0.38    0.44
  -9  19   0    0.65    0.26
  -9  19   0    0.50    0.12
  -9  19   0    0.15    0.34
 -11 -19   0   -0.05    0.13
  11 -19   0    0.53    0.21
  11 -19   0    0.61    2.92
 -11 -19   0   -0.25    0.39
 -11 -19   0    0.06    0.33
  11 -19   0    0.26    0.43
 -11 -19   0    0.21    0.20
 -11  19   0    0.41    0.78
 -11  19   0    0.08    0.20
 -11  19   0    0.05    0.10
 -11  19   0   -0.03    0.66
 -11  19   0   -0.27    0.40
 -11  19   0    0.30    0.26
 -13 -19   0    0.25    0.35
 -13 -19   0    0.40    0.33
  13 -19   0    0.93    0.27
 -13  19   0    0.38    0.11
 -13  19   0    0.79    0.34
 -13  19   0    0.36    0.22
 -13  19   0   -0.05    0.45
  15 -19   0    2.22    0.40
   0 -20   0    2.36    0.40
   0 -20   0    3.16    0.41
   0 -20   0    3.74    0.66
   0 -20   0    2.29    0.34
   0 -20   0    2.57    0.38
   0  20   0    1.24    0.45
   0  20   0    1.46    0.16
   0  20   0    1.82    0.20
   0  20   0    1.70    0.38
   0  20   0    1.50    0.26
   2 -20   0    6.17    0.59
  -2 -20   0    5.39    0.49
  -2 -20   0    6.56    0.77
  -2 -20   0    5.77    0.60
  -2 -20   0    5.40    0.51
  -2 -20   0    5.22    0.55
   2 -20   0    6.69    0.73
   2 -20   0    5.41    0.57
  -2 -20   0    6.72    0.65
   2 -20   0    5.55    0.57
   2 -20   0    5.38    0.49
  -2  20   0    4.22    0.31
  -2  20   0    4.42    0.46
  -2  20   0    3.81    0.69
  -2  20   0    4.32    0.59
   2  20   0    3.91    0.33
  -2  20   0    4.33    0.38
   2  20   0    4.44    0.41
  -4 -20   0    4.53    0.56
   4 -20   0    3.39    1.42
  -4 -20   0    4.54    0.63
   4 -20   0    5.78    0.71
   4 -20   0    5.19    0.47
  -4 -20   0    5.11    0.45
   4 -20   0    4.77    0.41
  -4 -20   0    6.17    0.73
  -4 -20   0    5.69    0.49
   4 -20   0    4.26    0.51
   4 -20   0   -0.37    2.73
   4 -20   0    3.91    0.54
  -4 -20   0    5.05    0.52
  -4  20   0    2.57    0.73
  -4  20   0    3.47    0.36
  -4  20   0    3.01    1.05
  -4  20   0    3.91    0.42
  -4  20   0    4.59    0.52
   4  20   0    2.93    0.27
   6 -20   0    1.20    0.30
  -6 -20   0    2.13    0.45
  -6 -20   0    2.25    0.31
   6 -20   0    2.23    0.34
   6 -20   0    1.62    0.24
   6 -20   0    2.02    0.27
  -6 -20   0    1.49    0.26
  -6 -20   0    2.04    0.35
  -6 -20   0    2.65    0.46
   6 -20   0    0.55    1.50
   6 -20   0    2.47    0.49
  -6 -20   0    2.10    0.35
  -6  20   0    1.45    0.33
  -6  20   0    1.42    0.58
  -6  20   0    1.04    0.26
  -6  20   0    1.24    0.15
  -6  20   0    1.46    0.48
  -6  20   0    1.13    0.47
  -6  20   0    1.03    0.21
  -8 -20   0    8.10    0.81
   8 -20   0    9.32    0.89
   8 -20   0    8.48    2.80
  -8 -20   0    6.94    0.70
  -8 -20   0    8.07    0.65
   8 -20   0    8.56    0.64
   8 -20   0    8.37    0.64
  -8 -20   0    7.81    0.60
  -8  20   0    6.01    0.84
  -8  20   0    7.09    0.53
  -8  20   0    5.82    0.70
  -8  20   0    6.22    0.45
  -8  20   0    4.96    1.01
  10 -20   0    0.40    0.21
 -10 -20   0    0.26    0.40
  10 -20   0    0.89    0.47
  10 -20   0   -1.94    2.54
 -10 -20   0    0.08    0.14
  10 -20   0   -0.11    0.19
 -10 -20   0    0.26    0.21
 -10 -20   0    0.04    0.25
 -10 -20   0    0.15    0.34
 -10  20   0    0.08    0.10
 -10  20   0    0.07    0.80
 -10  20   0    0.02    0.41
 -10  20   0    0.05    0.19
 -10  20   0    0.14    0.27
 -10  20   0    0.28    0.70
 -12 -20   0   -0.28    0.32
  12 -20   0    0.33    0.23
 -12 -20   0    0.20    0.21
 -12  20   0    0.17    0.20
 -12  20   0    0.13    0.50
 -12  20   0    0.83    0.32
 -12  20   0    0.02    0.10
  14 -20   0    2.05    0.60
 -14  20   0    1.19    0.35
   1 -21   0    0.96    0.27
  -1 -21   0    1.17    0.31
   1 -21   0    0.48    0.22
   1 -21   0    0.63    0.18
   1 -21   0    0.87    0.29
  -1 -21   0    0.47    0.21
  -1 -21   0    0.87    0.28
  -1 -21   0    0.79    0.18
   1  21   0    0.64    0.22
  -1  21   0    0.58    0.17
  -1  21   0    0.14    0.46
   1  21   0    0.59    0.15
  -1  21   0    0.72    0.23
   1  21   0    0.52    0.09
   3 -21   0    2.96    0.49
   3 -21   0    3.50    0.50
  -3 -21   0    4.02    0.44
  -3 -21   0    3.60    0.46
  -3 -21   0    3.98    0.39
   3 -21   0    2.88    0.30
   3 -21   0    3.40    0.45
   3 -21   0    3.48    0.40
  -3 -21   0    4.17    0.55
   3  21   0    2.99    0.26
  -3  21   0    3.06    0.54
   3  21   0    2.28    0.34
  -3  21   0    2.47    0.64
  -3  21   0    2.81    0.23
  -3  21   0    2.48    0.38
  -3  21   0    2.29    0.36
  -3  21   0    2.63    0.28
   5 -21   0    5.46    0.50
   5 -21   0    5.63    0.45
   5 -21   0    5.20    0.54
   5 -21   0    5.12    0.59
  -5 -21   0    5.44    0.60
  -5 -21   0    6.15    0.53
  -5 -21   0    6.32    0.48
  -5 -21   0    4.21    0.65
  -5 -21   0    4.66    0.55
  -5  21   0    4.59    0.36
  -5  21   0    5.30    0.55
  -5  21   0    4.37    0.66
  -5  21   0    4.95    0.44
  -5  21   0    4.71    0.55
   7 -21   0    4.12    0.59
   7 -21   0    2.35    2.10
  -7 -21   0    5.16    0.50
   7 -21   0    5.93    0.78
  -7 -21   0    4.75    0.55
   7 -21   0    5.12    0.49
  -7 -21   0    5.52    0.45
   7 -21   0    5.04    0.48
  -7 -21   0    3.84    0.69
  -7 -21   0    5.88    0.68
  -7  21   0    2.08    0.72
  -7  21   0    3.33    0.66
  -7  21   0    3.92    0.55
  -7  21   0    3.33    0.27
  -7  21   0    2.67    0.47
  -7  21   0    2.83    0.37
   9 -21   0    0.70    2.40
  -9 -21   0    1.96    0.36
  -9 -21   0    2.32    0.47
   9 -21   0    2.94    0.38
  -9 -21   0    2.74    0.39
  -9 -21   0    2.56    0.52
  -9 -21   0    2.75    0.31
   9 -21   0    2.18    0.36
   9 -21   0    3.47    0.57
  -9  21   0    1.48    0.16
  -9  21   0    1.23    0.24
  -9  21   0    0.88    0.50
  -9  21   0    2.05    0.33
 -11 -21   0    0.66    0.57
 -11 -21   0    1.09    0.38
 -11 -21   0    1.28    0.29
 -11  21   0    1.71    0.35
 -11  21   0    1.22    0.15
 -11  21   0    0.66    0.68
 -13 -21   0    0.74    0.40
 -13  21   0    0.49    0.12
 -13  21   0    0.80    0.39
   0 -22   0    7.64    0.71
   0 -22   0    7.77    0.68
   0 -22   0    9.29    0.88
   0 -22   0    8.25    0.64
   0 -22   0    8.64    0.73
   0  22   0    6.54    0.59
   0  22   0    6.41    0.50
   0  22   0    6.38    0.44
   2 -22   0    4.20    0.55
  -2 -22   0    3.32    0.47
   2 -22   0    3.42    0.46
  -2 -22   0    4.39    0.52
  -2 -22   0    3.56    0.45
   2 -22   0    4.14    0.41
  -2 -22   0    3.74    0.40
   2 -22   0    3.13    0.48
   2  22   0    3.30    0.30
  -2  22   0    2.29    0.40
  -2  22   0    2.75    0.23
   2  22   0    2.55    0.22
  -2  22   0    2.31    0.63
  -2  22   0    3.27    0.59
  -2  22   0    2.80    0.34
   2  22   0    2.88    0.35
  -2  22   0    2.26    0.37
  -4 -22   0    4.34    0.58
   4 -22   0    3.30    0.47
   4 -22   0    3.79    0.43
  -4 -22   0    4.51    0.41
  -4 -22   0    3.84    0.45
   4 -22   0    3.38    0.52
  -4 -22   0    4.18    0.53
   4 -22   0    3.41    0.52
  -4 -22   0    3.61    0.48
  -4  22   0    2.74    0.72
  -4  22   0    2.68    0.34
  -4  22   0    3.03    0.25
  -4  22   0    2.91    0.49
   4  22   0    2.80    0.29
  -4  22   0    2.49    0.42
  -4  22   0    3.39    0.64
   6 -22   0    7.61    0.61
   6 -22   0    4.55    1.76
   6 -22   0    7.87    0.73
  -6 -22   0    8.75    1.36
  -6 -22   0    7.01    0.69
  -6 -22   0    8.25    0.76
  -6  22   0    4.89    0.37
  -6  22   0    3.11    0.89
  -6  22   0    6.65    0.81
  -6  22   0    5.15    0.45
  -6  22   0    5.13    0.95
  -6  22   0    4.36    0.80
  -8 -22   0    0.03    0.42
   8 -22   0   -0.18    0.19
  -8 -22   0    0.35    0.21
  -8 -22   0    0.16    0.14
  -8 -22   0    0.35    0.30
   8 -22   0    0.07    0.17
  -8 -22   0    0.04    0.36
   8 -22   0    0.40    0.48
  -8  22   0   -0.09    0.10
  -8  22   0    0.01    0.18
  -8  22   0   -0.19    0.28
 -10 -22   0    0.44    0.23
 -10 -22   0    0.19    0.61
  10 -22   0   -0.25    0.26
 -10 -22   0    0.22    0.33
 -10 -22   0    0.28    0.37
  10 -22   0    0.28    0.54
  10 -22   0    0.34    0.21
 -10 -22   0    0.28    0.15
 -10  22   0    0.67    0.38
 -10  22   0    0.47    0.32
 -12 -22   0    0.43    0.23
 -12 -22   0    0.25    0.43
 -12  22   0    0.28    0.11
 -12  22   0    0.65    0.29
  14 -22   0    0.78    0.28
 -14 -22   0    0.42    0.37
  14 -22   0    0.15    0.32
   1 -23   0    1.62    0.33
   1 -23   0    2.39    0.48
   1 -23   0    1.70    0.31
   1 -23   0    2.29    0.34
  -1 -23   0    1.47    0.36
  -1 -23   0    2.26    0.33
  -1 -23   0    1.26    0.25
  -1 -23   0    2.17    0.36
   1 -23   0    1.52    0.34
  -1  23   0    1.17    0.31
   1  23   0    1.47    0.21
  -1  23   0    1.33    0.22
   1  23   0    1.48    0.15
   1  23   0    1.52    0.32
  -1  23   0    1.26    0.15
   3 -23   0    3.79    0.56
  -3 -23   0    4.31    0.52
   3 -23   0    3.82    0.77
  -3 -23   0    2.56    0.43
   3 -23   0    2.45    0.53
   3 -23   0    5.25    1.07
  -3 -23   0    3.57    0.56
   3  23   0    2.24    0.26
  -3  23   0    0.86    0.64
  -3  23   0    1.90    0.25
  -3  23   0    1.72    0.63
  -3  23   0    1.83    0.20
  -3  23   0    2.41    0.33
   5 -23   0    6.89    0.52
  -5 -23   0    8.12    0.70
   5 -23   0    7.22    0.68
   5 -23   0    7.86    0.61
   5 -23   0    6.90    0.68
  -5 -23   0    8.24    0.63
  -5 -23   0    6.88    0.71
  -5  23   0    5.47    0.49
  -5  23   0    5.79    0.71
  -5  23   0    6.53    0.63
  -5  23   0    6.00    0.43
  -7 -23   0    0.48    0.22
   7 -23   0    0.18    0.28
   7 -23   0    1.17    0.48
  -7 -23   0    0.72    0.18
   7 -23   0    0.44    0.16
  -7 -23   0    0.83    0.32
  -7 -23   0    0.90    0.36
   7 -23   0    0.31    0.21
  -7 -23   0    0.77    0.44
   7 -23   0    0.23    0.30
  -7  23   0    0.22    0.30
  -7  23   0    0.18    0.18
  -7  23   0    0.19    0.11
   9 -23   0    3.94    0.55
   9 -23   0    4.67    0.63
  -9 -23   0    4.34    0.50
   9 -23   0    5.83    0.74
  -9 -23   0    5.10    0.50
  -9 -23   0    3.55    0.63
  -9 -23   0    5.27    0.44
   9 -23   0    5.38    0.46
  -9 -23   0    4.90    0.77
  -9  23   0    3.12    0.45
  -9  23   0    3.21    0.28
  11 -23   0    0.06    0.68
 -11 -23   0    0.88    0.25
 -11 -23   0    1.57    0.46
 -11  23   0    1.25    0.35
 -11  23   0    0.61    0.13
  13 -23   0    0.57    0.26
 -13 -23   0    0.86    0.45
  13 -23   0    0.03    0.33
 -13  23   0    0.29    0.42
   0 -24   0    1.48    0.41
   0 -24   0    1.88    0.31
   0 -24   0    2.62    0.35
   0 -24   0    2.09    0.39
   0  24   0    1.43    0.21
   0  24   0    1.63    0.18
   2 -24   0    4.43    0.44
   2 -24   0    3.60    0.56
   2 -24   0    3.76    0.49
  -2 -24   0    4.10    0.53
  -2 -24   0    3.96    0.48
  -2 -24   0    4.13    0.55
  -2  24   0    2.41    0.29
   2  24   0    3.44    0.30
  -2  24   0    3.33    0.49
   2  24   0    3.23    0.25
  -2  24   0    2.79    0.25
   4 -24   0    3.71    0.52
   4 -24   0    4.13    0.43
   4 -24   0    3.96    0.52
  -4 -24   0    4.02    0.46
  -4 -24   0    4.21    0.54
  -4  24   0    2.93    0.34
  -4  24   0    3.65    0.54
  -4  24   0    2.73    0.26
  -6 -24   0    1.47    0.35
   6 -24   0    1.12    0.37
   6 -24   0    1.47    0.26
   6 -24   0    0.75    0.29
  -6 -24   0    1.30    0.25
  -6 -24   0    1.86    0.46
  -6  24   0    1.33    0.35
  -6  24   0    0.55    0.19
  -6  24   0    0.63    0.13
   8 -24   0    0.11    0.34
  -8 -24   0    0.62    0.25
   8 -24   0    0.18    0.25
   8 -24   0    1.01    0.58
   8 -24   0    0.14    0.33
  -8 -24   0    0.55    0.52
  -8 -24   0    0.54    0.34
  -8 -24   0    0.61    0.19
  -8  24   0    0.19    0.21
  -8  24   0   -0.12    0.12
  -8  24   0    0.21    0.37
 -10 -24   0    0.00    0.25
  10 -24   0   -0.04    0.44
  10 -24   0    0.36    0.21
 -10  24   0    0.23    0.25
 -10  24   0    1.62    0.60
  12 -24   0    0.73    0.36
 -12  24   0    0.64    0.16
 -12  24   0    1.16    0.39
  -1 -25   0    1.22    0.22
   1 -25   0    1.62    0.36
   1 -25   0    0.91    0.28
  -1 -25   0    0.93    0.28
  -1 -25   0    1.07    0.34
  -1 -25   0    1.82    0.48
   1 -25   0    1.05    0.21
   1  25   0    0.63    0.15
  -1  25   0    0.66    0.17
  -1  25   0    0.63    0.29
   1  25   0    0.79    0.12
  -1  25   0    0.72    0.12
  -3 -25   0    1.89    0.37
   3 -25   0    2.12    0.39
  -3 -25   0    1.38    0.27
  -3 -25   0    2.58    0.49
   3 -25   0    1.88    0.33
  -3  25   0    1.67    0.35
  -3  25   0    1.21    0.16
   3  25   0    1.23    0.16
  -3  25   0    1.18    0.21
   5 -25   0    1.17    0.50
   5 -25   0    0.57    0.38
  -5 -25   0    0.65    0.45
  -5 -25   0    0.66    0.20
   5 -25   0    0.01    0.29
  -5 -25   0    0.47    0.35
  -5 -25   0    0.45    0.25
   5 -25   0    0.45    0.24
  -5  25   0    0.02    0.22
  -5  25   0    0.33    0.38
  -5  25   0    0.05    0.12
   7 -25   0    1.07    0.38
  -7 -25   0    1.07    0.38
   7 -25   0    1.45    0.61
   7 -25   0    0.72    0.36
  -7 -25   0    1.02    0.41
  -7 -25   0    1.15    0.76
  -7  25   0    0.49    0.22
  -7  25   0    0.48    0.14
  -7  25   0    1.42    0.44
  -9 -25   0   -0.26    0.49
  -9 -25   0    0.02    0.20
   9 -25   0    0.74    0.67
  -9 -25   0   -0.30    0.26
  -9 -25   0    0.31    0.33
   9 -25   0   -0.28    0.36
  -9  25   0    0.02    0.13
  -9  25   0    0.34    0.46
  -9  25   0    0.41    0.31
   0 -26   0    6.34    0.77
   0 -26   0    4.94    0.64
   0 -26   0    5.99    0.54
   0 -26   0    5.29    0.59
   0  26   0    3.19    0.32
   0  26   0    3.49    0.27
  -2 -26   0    0.47    0.28
   2 -26   0    1.13    0.26
   2 -26   0    1.75    0.53
  -2 -26   0    0.92    0.38
  -2 -26   0    1.72    0.50
   2 -26   0    1.19    0.39
  -2 -26   0    1.02    0.23
  -2  26   0    0.25    0.13
   2  26   0    0.47    0.14
   2  26   0    0.36    0.18
  -2  26   0    0.26    0.41
  -2  26   0    0.46    0.17
  -4 -26   0    2.45    0.43
   4 -26   0    2.65    0.47
   4 -26   0    2.78    0.57
   4 -26   0    1.55    0.34
   4 -26   0    3.20    0.47
  -4 -26   0    2.52    0.54
  -4 -26   0    1.79    0.34
  -4  26   0    1.32    0.23
  -4  26   0    1.50    0.58
  -4  26   0    1.56    0.18
  -6 -26   0    4.93    0.75
   6 -26   0    4.62    0.63
  -6 -26   0    4.93    0.70
   6 -26   0    5.35    0.89
  -6 -26   0    4.18    0.50
   6 -26   0    3.25    0.54
  -6  26   0    2.58    0.27
  -6  26   0    3.43    0.38
  -8 -26   0    0.95    0.36
   8 -26   0   -0.18    0.47
  -8 -26   0    1.18    0.23
  -8 -26   0    0.75    0.29
   8 -26   0    1.44    0.63
   8 -26   0    0.44    0.36
  -8 -26   0    0.49    0.55
  -8  26   0    1.30    0.51
   1 -27   0    2.06    0.37
   1 -27   0    2.23    0.46
  -1 -27   0    2.00    0.37
  -1 -27   0    2.45    0.45
  -1  27   0    1.93    0.21
  -1  27   0    1.41    0.22
   1  27   0    1.72    0.20
  -1  27   0    2.10    0.54
   3 -27   0    2.43    0.48
  -3 -27   0    2.13    0.53
  -3 -27   0    1.96    0.37
   3 -27   0    1.83    0.43
  -3 -27   0    3.47    0.81
   3 -27   0    3.18    0.62
  -3  27   0    1.38    0.19
  -3  27   0    1.51    0.54
  -3  27   0    1.06    0.22
  -5 -27   0    0.67    0.45
  -5 -27   0    0.82    0.55
  -5 -27   0    0.87    0.28
  -5 -27   0    0.47    0.30
   5 -27   0    0.90    0.44
   5 -27   0    1.47    0.66
   5 -27   0    0.47    0.36
   5 -27   0    1.11    0.36
  -5  27   0    0.44    0.55
  -5  27   0    0.11    0.16
  -5  27   0    0.20    0.22
  -7 -27   0    1.07    0.95
  -7 -27   0    1.91    0.41
   7 -27   0    1.57    0.40
  -7 -27   0    2.28    0.29
   7 -27   0    3.20    0.65
  -7  27   0    1.17    0.17
  -7  27   0    2.11    0.55
   0 -28   0    4.41    0.60
   0 -28   0    4.80    0.65
   0  28   0    3.15    0.28
  -2 -28   0    4.39    0.64
   2 -28   0    5.30    0.56
  -2 -28   0    3.23    0.54
   2 -28   0    3.66    0.59
  -2 -28   0    4.51    0.69
   2 -28   0    3.94    0.58
  -2  28   0    2.03    0.23
  -2  28   0    1.69    0.94
  -2  28   0    1.96    0.29
   4 -28   0    2.40    0.39
  -4 -28   0    2.35    0.45
   4 -28   0    2.19    0.60
   4 -28   0    2.27    0.47
  -4 -28   0    1.66    0.53
  -4  28   0    0.94    0.16
  -4  28   0    1.81    0.62
   1 -29   0    1.15    0.43
  -1 -29   0    1.43    0.43
   1 -29   0    0.63    0.33
   1 -29   0    1.41    0.31
  -1 -29   0    1.41    0.29
  -1 -29   0    1.15    0.52
   1 -29   0    0.82    0.54
  -1  29   0    0.40    0.17
  20   0  -1    0.34    0.26
  20   0  -1    0.57    0.29
 -20   0   1    0.31    0.34
  20   0  -1    0.09    0.21
  20   0  -1    0.36    0.25
  20   0  -1    0.31    0.11
  20   0  -1    0.61    0.29
  18   0  -1    1.95    0.20
  18   0  -1    1.58    0.39
 -18   0   1    1.59    0.32
  18   0  -1    1.97    0.34
  18   0  -1    1.72    0.29
  18   0  -1    0.77    0.56
 -18   0   1    1.26    0.70
  18   0  -1    1.75    0.26
  18   0  -1    1.97    0.29
  16   0  -1    1.12    0.15
  16   0  -1    1.29    0.57
  16   0  -1    1.43    0.51
 -16   0   1    0.75    0.53
  16   0  -1    1.62    0.24
  16   0  -1    1.64    0.28
  16   0  -1    1.05    0.26
 -16   0   1    1.74    0.34
  16   0  -1    1.18    0.22
  16   0  -1    1.41    0.31
  16   0  -1    1.21    0.29
  14   0  -1    4.97    0.42
  14   0  -1    4.28    0.48
  14   0  -1    4.32    0.38
  14   0  -1    3.65    0.63
  14   0  -1    3.76    0.32
 -14   0   1    5.04    0.83
  14   0  -1    4.51    0.61
  14   0  -1    4.65    0.47
  14   0  -1    3.41    0.67
  14   0  -1    4.40    0.43
  14   0  -1    5.15    0.44
 -12   0   1   11.39    1.02
 -12   0   1    9.55    0.67
  12   0  -1   10.36    0.97
  12   0  -1    9.47    0.85
  12   0  -1   10.46    0.67
  12   0  -1    8.75    0.77
  12   0  -1    8.69    0.73
  12   0  -1   10.78    0.89
  12   0  -1    9.54    0.70
  10   0  -1   51.89    3.15
  10   0  -1   49.20    3.03
  10   0  -1   48.13    4.51
  10   0  -1   49.95    3.22
 -10   0   1   44.26    3.13
  10   0  -1   46.88    3.67
 -10   0   1   38.81    4.57
  10   0  -1   46.41    3.01
  10   0  -1   46.99    3.07
 -10   0   1   48.97    3.25
 -10   0   1   47.71    3.07
 -10   0   1   45.78    4.66
  10   0  -1   51.60    4.33
 -10   0   1   42.93    3.20
  10   0  -1   51.71    3.05
  10   0  -1   50.10    3.15
  10   0  -1   49.43    3.09
   8   0  -1    2.48    0.32
   8   0  -1    2.14    0.34
   8   0  -1    2.12    0.39
   8   0  -1    1.71    0.19
   8   0  -1    2.93    1.04
   8   0  -1    1.75    0.25
  -8   0   1    1.95    0.26
  -8   0   1    2.75    1.14
  -8   0   1    1.90    0.25
  -8   0   1    2.25    0.32
  -8   0   1    2.32    0.36
   8   0  -1    2.23    0.25
  -8   0   1    2.30    0.27
  -8   0   1    2.35    1.07
  -8   0   1    2.49    0.32
  -8   0   1    2.29    0.37
  -8   0   1    2.64    0.41
  -6   0   1   45.87    3.55
   6   0  -1   41.72    2.73
  -6   0   1   42.70    2.73
   6   0  -1   45.89    2.68
   6   0  -1   42.29    2.67
  -6   0   1   43.10    2.69
   6   0  -1   44.05    2.70
  -6   0   1   38.48    2.71
  -6   0   1   42.01    2.67
   6   0  -1   39.32    2.69
   6   0  -1   47.28    3.44
  -6   0   1   37.28    2.69
   6   0  -1   39.86    2.64
  -6   0   1   47.02    3.57
  -6   0   1   40.21    2.68
  -6   0   1   41.86    2.68
  -2   0   1   88.79    5.71
  -2   0   1   79.14    5.42
   2   0  -1   90.55    5.68
   0   0  -1   39.10    2.35
   0   0  -1   35.66    2.36
   0   0   1   37.11    2.56
   0   0  -1   37.38    2.57
  -2   0  -1   41.86    2.89
   2   0   1   49.71    2.88
   2   0   1   49.63    2.89
   2   0   1   41.25    3.73
   2   0   1   44.73    2.87
  -2   0  -1   41.48    2.88
  -2   0  -1   49.94    2.88
  -2   0  -1   44.79    3.33
   4   0   1  214.19   13.26
  -4   0  -1  185.28   13.34
  -4   0  -1  202.65   13.36
   6   0   1    1.77    0.92
  -6   0  -1    1.85    0.81
  -6   0  -1    2.33    0.81
  -6   0  -1    2.39    0.29
  -6   0  -1    2.10    0.25
   6   0   1    2.03    0.30
   6   0   1    2.36    0.18
   6   0   1    2.00    0.35
  -6   0  -1    1.55    0.27
   6   0   1    1.79    0.88
  -6   0  -1    0.94    0.91
   6   0   1    2.30    0.21
   6   0   1    1.86    0.27
   6   0   1    2.17    0.23
  -6   0  -1    1.63    0.28
   8   0   1   21.35    1.47
  -8   0  -1   21.44    1.41
   8   0   1   19.27    2.57
   8   0   1   22.34    1.47
   8   0   1   19.70    1.96
  -8   0  -1   26.27    3.02
   8   0   1   21.91    1.40
   8   0   1   21.31    1.36
   8   0   1   21.61    1.53
  -8   0  -1   18.66    1.48
   8   0   1   24.53    2.81
  -8   0  -1   21.69    1.43
 -10   0  -1    7.30    2.06
  10   0   1    6.52    0.47
  10   0   1    6.72    0.53
 -10   0  -1    7.43    0.59
 -10   0  -1    5.47    1.64
  10   0   1    6.80    0.44
  10   0   1    6.81    0.55
  10   0   1    6.29    2.13
 -10   0  -1    5.07    0.67
  10   0   1    6.70    0.71
 -10   0  -1    4.68    2.16
  10   0   1    6.95    0.64
  10   0   1    9.41    2.48
  10   0   1    6.54    0.63
  12   0   1    3.09    0.33
  12   0   1    2.47    0.56
  12   0   1    2.52    0.51
  12   0   1    2.51    0.26
  12   0   1    2.06    0.20
  14   0   1    0.40    0.21
  14   0   1    0.06    0.19
  14   0   1   -0.08    0.38
 -14   0  -1    0.87    0.46
  14   0   1    0.10    0.15
  14   0   1    0.33    0.39
 -14   0  -1    0.29    0.23
  14   0   1    0.06    0.28
  14   0   1   -0.33    0.38
  14   0   1    0.39    0.09
  16   0   1    0.51    0.11
 -16   0  -1    0.47    0.76
  16   0   1    0.04    0.45
  16   0   1    0.91    0.24
  16   0   1    0.74    0.23
  16   0   1    0.61    0.55
  16   0   1    0.75    0.25
  16   0   1    0.58    0.26
  16   0   1    0.61    0.21
 -18   0  -1    0.07    0.25
  18   0   1    0.10    0.22
  18   0   1    0.19    0.09
  18   0   1    0.07    0.20
  18   0   1    0.25    0.22
  18   0   1    0.03    0.19
 -18   0  -1   -0.06    0.60
  18   0   1    0.59    0.72
  18   0   1    0.21    0.19
  20   0   1    0.19    0.34
  20   0   1    0.13    0.22
  20   0   1    0.36    0.11
  20   0   1    0.43    0.46
 -20   0  -1    0.24    0.37
  20   0   1    0.17    0.25
  21  -1  -1    0.28    0.30
  21  -1  -1    0.19    0.11
  21  -1  -1    0.26    0.27
  21  -1  -1    0.69    0.30
  21  -1  -1    0.69    0.35
 -21  -1   1   -0.02    0.32
  21   1  -1    0.27    0.23
  21   1  -1    0.55    0.38
  21   1  -1    0.34    0.32
 -21   1   1    0.60    0.33
  21   1  -1   -0.13    0.27
  21   1  -1    0.28    0.31
  21   1  -1    0.04    0.11
  19  -1  -1   -0.02    0.19
  19  -1  -1   -0.05    0.09
 -19  -1   1   -0.11    0.23
 -19  -1   1    0.97    0.70
  19  -1  -1   -0.14    0.22
  19  -1  -1   -0.17    0.19
  19  -1  -1   -0.55    0.65
  19  -1  -1    0.03    0.21
  19  -1  -1    0.04    0.45
  19   1  -1   -0.19    0.23
  19   1  -1   -0.22    0.18
  19   1  -1   -0.14    0.21
 -19   1   1    0.34    0.76
  19   1  -1   -0.21    0.34
  19   1  -1   -0.10    0.11
 -19   1   1   -0.12    0.25
  19   1  -1   -0.02    0.22
  17  -1  -1    1.28    0.33
  17  -1  -1    0.85    0.59
  17  -1  -1    1.94    0.28
  17  -1  -1    1.41    0.26
  17  -1  -1    1.17    0.31
  17  -1  -1    0.93    0.50
 -17  -1   1    1.52    0.62
  17  -1  -1    1.45    0.16
 -17  -1   1    1.16    0.30
  17   1  -1    0.49    0.32
  17   1  -1    1.53    0.16
  17   1  -1    1.66    0.26
  17   1  -1    0.98    0.30
 -17   1   1    1.16    0.30
  17   1  -1    1.24    0.32
  17   1  -1    0.74    0.62
 -17   1   1    1.76    0.66
  17   1  -1    1.19    0.27
  15  -1  -1    1.06    0.26
  15  -1  -1    0.39    0.17
  15  -1  -1    0.44    0.46
  15  -1  -1    0.44    0.19
  15  -1  -1    0.75    0.21
  15  -1  -1    0.49    0.28
  15  -1  -1    0.16    0.41
  15  -1  -1    0.59    0.22
  15  -1  -1    0.85    0.11
 -15  -1   1    0.72    0.46
  15   1  -1    0.72    0.24
 -15   1   1    0.60    0.52
  15   1  -1    0.62    0.17
  15   1  -1    0.81    0.24
  15   1  -1   -0.01    0.40
  15   1  -1    0.45    0.47
  15   1  -1    0.40    0.22
  15   1  -1    0.93    0.12
  13  -1  -1    1.20    0.20
  13  -1  -1    1.13    0.18
 -13  -1   1    1.18    0.43
  13  -1  -1    1.88    0.30
  13  -1  -1    1.00    0.22
  13  -1  -1    0.91    0.34
  13  -1  -1    0.66    0.50
  13  -1  -1    0.83    0.24
  13  -1  -1    1.31    0.21
  13  -1  -1    1.16    0.12
  13  -1  -1    1.16    0.39
 -13   1   1    0.36    0.38
  13   1  -1    1.17    0.12
  13   1  -1    0.78    0.21
  13   1  -1    0.84    0.20
 -13   1   1    0.84    0.33
 -13   1   1    0.78    0.19
  13   1  -1    1.18    0.28
  13   1  -1    1.11    0.22
  13   1  -1    1.00    0.43
 -13   1   1    1.70    0.46
  13   1  -1    0.83    0.20
  13   1  -1    0.95    0.43
  13   1  -1    1.03    0.34
 -11  -1   1    9.85    3.73
 -11  -1   1    9.87    0.85
  11  -1  -1    9.78    0.63
  11  -1  -1   10.77    0.82
 -11  -1   1    8.25    0.78
  11  -1  -1    8.81    2.01
 -11  -1   1   10.77    0.92
  11  -1  -1    8.13    0.61
  11  -1  -1   10.15    0.80
  11  -1  -1    6.93    1.95
 -11  -1   1    5.11    2.93
 -11  -1   1    8.17    0.87
  11  -1  -1    9.07    0.71
  11  -1  -1   10.55    0.92
 -11  -1   1    7.88    0.83
  11  -1  -1   10.55    0.66
  11  -1  -1    9.09    0.69
  11   1  -1   11.10    0.87
  11   1  -1    9.69    0.73
 -11   1   1    8.31    1.04
  11   1  -1    9.70    0.75
  11   1  -1   11.05    0.71
 -11   1   1    7.27    2.19
  11   1  -1   11.49    3.92
  11   1  -1    6.38    2.30
  11   1  -1   10.42    0.68
 -11   1   1    9.33    0.95
  11   1  -1   10.54    0.93
  11   1  -1   11.02    0.84
 -11   1   1   10.37    0.75
 -11   1   1    9.67    1.00
   9  -1  -1   34.03    2.35
   9  -1  -1   39.37    2.39
  -9  -1   1   35.51    2.57
  -9  -1   1   41.66    2.48
   9  -1  -1   31.91    3.52
   9  -1  -1   37.87    2.46
   9  -1  -1   40.03    2.96
   9  -1  -1   37.55    2.40
  -9  -1   1   35.59    2.50
  -9  -1   1   37.58    2.44
  -9  -1   1   33.53    3.71
   9  -1  -1   34.62    2.36
  -9  -1   1   39.69    2.37
   9  -1  -1   35.62    3.41
   9   1  -1   37.30    2.35
  -9   1   1   38.06    2.53
  -9   1   1   36.54    2.42
   9   1  -1   38.60    2.39
   9   1  -1   36.05    2.87
   9   1  -1   32.98    3.45
  -9   1   1   39.67    2.46
   9   1  -1   36.20    2.44
  -9   1   1   39.18    2.42
   9   1  -1   39.59    2.46
  -9   1   1   36.58    2.54
   9   1  -1   36.51    3.31
  -9   1   1   31.42    3.73
   9   1  -1   35.50    2.40
   9   1  -1   34.70    2.49
  -9   1   1   40.70    2.41
   7  -1  -1   72.83    4.96
   7  -1  -1   80.74    5.03
   7  -1  -1   75.71    4.99
   7  -1  -1   78.89    5.91
   7  -1  -1   80.64    5.00
   7  -1  -1   78.03    4.97
   7  -1  -1   75.95    5.07
  -7  -1   1   81.25    4.99
  -7  -1   1   81.30    5.02
  -7  -1   1   79.07    5.06
  -7  -1   1   80.68    5.03
  -7  -1   1   77.86    5.04
  -7  -1   1   81.30    5.99
   7  -1  -1   76.67    5.03
  -7  -1   1   83.82    6.00
  -7  -1   1   83.02    5.09
   7   1  -1   76.43    5.01
  -7   1   1   78.73    4.99
   7   1  -1   73.21    4.94
   7   1  -1   82.45    5.05
  -7   1   1   72.29    5.01
  -7   1   1   78.44    5.06
   7   1  -1   85.22    5.02
  -7   1   1   75.84    4.99
  -7   1   1   81.19    6.10
  -7   1   1   78.24    6.03
   7   1  -1   80.20    4.97
  -7   1   1   77.24    5.00
  -7   1   1   80.02    5.01
   7   1  -1   83.87    4.98
   7   1  -1   81.31    5.80
  -5  -1   1  453.53   28.44
   3  -1  -1   58.88    3.92
   3  -1  -1   55.70    4.43
  -3  -1   1   64.86    3.89
  -3  -1   1   63.05    4.21
  -3  -1   1   61.44    3.91
  -3  -1   1   56.84    3.90
  -3  -1   1   67.63    3.91
  -3  -1   1   57.93    3.89
  -3  -1   1   67.26    3.89
  -3  -1   1   61.15    4.27
   3  -1  -1   65.41    4.33
   3   1  -1   64.58    3.99
  -3   1   1   65.05    4.00
   3   1  -1   64.69    3.98
   3   1  -1   68.70    4.23
  -3   1   1   57.49    3.98
  -3   1   1   64.44    4.44
   3   1  -1   61.20    4.28
  -3   1   1   63.88    3.98
  -3   1   1   65.56    4.41
   3   1  -1   57.86    3.97
  -1  -1   1    5.50    0.41
   1  -1  -1    7.00    0.59
   1  -1  -1    5.44    0.38
   1  -1  -1    5.86    0.38
   1  -1  -1    6.52    0.40
   1  -1  -1    6.20    0.66
  -1  -1   1    5.84    0.57
   1  -1  -1    4.94    0.60
  -1   1   1    6.04    0.65
   1   1  -1    5.11    0.56
   1   1  -1    5.51    0.33
   1   1  -1    4.72    0.34
   1   1  -1    4.92    0.34
  -1   1   1    5.15    0.33
  -1  -1  -1    0.13    0.28
  -1  -1  -1    0.29    0.07
   1  -1   1    0.47    0.11
   1  -1   1    0.30    0.08
   1  -1   1    0.38    0.46
   1  -1   1    0.45    0.05
  -1  -1  -1    0.22    0.10
  -1  -1  -1    0.38    0.07
   1  -1   1    0.52    0.41
  -1  -1  -1    0.16    0.20
  -1  -1  -1    0.24    0.31
  -1   1  -1    0.49    0.07
  -1   1  -1    0.21    0.31
  -1   1  -1    0.32    0.37
  -1   1  -1    0.28    0.11
   1   1   1    0.29    0.31
  -1   1  -1    0.34    0.08
   1   1   1    0.26    0.06
  -1   1  -1    0.31    0.07
   1   1   1    0.15    0.30
   1   1   1    0.28    0.06
   1   1   1    0.37    0.05
  -1   1  -1    0.40    0.26
   3  -1   1   34.42    2.14
   3  -1   1   29.08    2.08
   3  -1   1   35.25    2.11
   3  -1   1   30.90    2.08
  -3  -1  -1   36.94    2.61
   3  -1   1   34.38    2.11
  -3  -1  -1   34.94    2.14
  -3  -1  -1   28.12    2.67
   3  -1   1   34.38    2.71
  -3  -1  -1   30.56    2.12
   3   1   1   33.42    2.72
  -3   1  -1   34.22    2.91
  -3   1  -1   29.63    2.77
  -3   1  -1   31.53    2.18
  -3   1  -1   39.08    2.81
   3   1   1   38.33    2.83
   3   1   1   37.89    2.21
   3   1   1   31.63    2.18
  -5  -1  -1  101.41    6.22
   5  -1   1   89.38    6.32
  -5  -1  -1  105.19    6.22
   5  -1   1  104.87    6.25
  -5  -1  -1   95.49    7.05
  -5  -1  -1  107.35    6.22
   5  -1   1  100.92    7.07
   5  -1   1  104.52    6.25
  -5  -1  -1   87.57    6.26
   5  -1   1   91.23    6.19
   5   1   1   94.55    6.19
   5   1   1   98.66    6.21
  -5   1  -1  110.34    6.23
   5   1   1   96.63    6.93
  -5   1  -1   91.17    6.22
  -5   1  -1  109.65    6.21
  -5   1  -1   92.06    6.27
   5   1   1  105.94    6.26
  -5   1  -1   91.86    7.19
  -5   1  -1   92.38    6.20
  -5   1  -1   96.40    7.20
   7  -1   1   23.08    1.48
   7  -1   1   27.13    2.84
   7  -1   1   23.35    1.59
  -7  -1  -1   27.17    2.57
   7  -1   1   22.62    2.57
  -7  -1  -1   20.02    1.54
   7  -1   1   22.88    1.54
  -7  -1  -1   17.31    2.54
   7  -1   1   24.61    1.54
  -7  -1  -1   25.73    2.69
  -7  -1  -1   20.96    1.47
   7   1   1   19.94    2.41
  -7   1  -1   17.43    2.58
   7   1   1   23.12    1.54
  -7   1  -1   22.20    1.47
   7   1   1   21.20    1.40
  -7   1  -1   18.83    1.56
   7   1   1   22.59    1.48
   7   1   1   21.77    1.48
  -7   1  -1   22.22    1.46
  -7   1  -1   21.31    1.51
   7   1   1   24.56    1.45
   7   1   1   24.00    1.43
   9  -1   1   18.69    1.19
   9  -1   1   18.52    1.21
   9  -1   1   17.22    2.70
  -9  -1  -1   16.00    1.28
   9  -1   1   18.73    1.15
  -9  -1  -1   18.29    1.24
  -9  -1  -1   17.87    2.61
   9  -1   1   17.75    1.18
   9  -1   1   15.64    1.13
   9  -1   1   18.56    1.28
  -9  -1  -1   18.31    1.17
  -9  -1  -1   17.18    2.72
   9  -1   1   14.49    2.52
   9  -1   1   18.50    1.27
   9  -1   1   17.53    1.34
  -9   1  -1   17.55    1.19
  -9   1  -1   19.63    1.20
  -9   1  -1   15.88    1.22
  -9   1  -1   18.33    2.81
   9   1   1   17.98    1.25
   9   1   1   16.55    2.53
   9   1   1   18.70    1.19
  -9   1  -1   18.06    1.29
   9   1   1   15.51    1.32
   9   1   1   18.41    1.17
   9   1   1   18.20    1.13
  -9   1  -1   17.53    2.58
  -9   1  -1   14.95    1.36
   9   1   1   12.65    2.37
   9   1   1   18.64    1.26
  -9   1  -1   12.08    2.99
  11  -1   1    7.35    0.81
  11  -1   1    7.58    0.51
  11  -1   1    7.75    0.60
  11  -1   1    7.33    0.72
  11  -1   1    7.93    0.54
 -11   1  -1    6.73    0.73
 -11   1  -1    8.29    2.10
 -11   1  -1    6.54    0.55
  11   1   1    6.67    0.45
  11   1   1    6.75    0.69
  11   1   1    6.75    0.48
  11   1   1    7.51    0.55
  11   1   1    6.51    0.76
  13  -1   1    2.80    0.34
  13  -1   1    2.97    0.23
 -13  -1  -1    3.08    0.60
 -13  -1  -1    2.22    0.34
  13  -1   1    1.90    0.51
  13  -1   1    2.65    0.36
  13  -1   1    3.00    0.37
  13  -1   1    2.67    0.29
  13  -1   1    2.68    0.51
  13   1   1    2.15    0.52
 -13   1  -1    2.78    0.62
  13   1   1    2.23    0.37
 -13   1  -1    2.57    0.34
  13   1   1    2.92    0.21
  13   1   1    1.98    0.27
  13   1   1    2.39    0.33
  13   1   1    2.37    0.34
  13   1   1    2.20    0.28
  13   1   1    2.40    0.51
  15  -1   1    0.44    0.18
  15  -1   1    0.43    0.23
  15  -1   1    0.73    0.28
  15  -1   1    0.67    0.21
  15  -1   1    0.42    0.19
  15  -1   1   -0.23    0.46
  15  -1   1    0.50    0.10
  15  -1   1    0.10    0.39
 -15  -1  -1    0.37    0.22
 -15  -1  -1    0.63    0.47
  15   1   1    0.33    0.78
  15   1   1    0.48    0.20
  15   1   1    0.40    0.20
  15   1   1    0.45    0.23
  15   1   1    0.40    0.20
  15   1   1    0.34    0.17
  15   1   1   -0.03    0.42
 -15   1  -1    0.39    0.48
  15   1   1    0.40    0.10
 -17  -1  -1   -0.30    0.49
  17  -1   1   -0.33    0.48
  17  -1   1    0.11    0.22
  17  -1   1   -0.26    0.17
  17  -1   1   -0.12    0.42
  17  -1   1    0.08    0.26
  17  -1   1   -0.39    0.25
  17  -1   1    0.27    0.32
  17  -1   1    0.14    0.09
 -17  -1  -1    0.06    0.28
  17  -1   1    0.18    0.59
  17   1   1   -0.08    0.27
  17   1   1    0.07    0.18
  17   1   1   -0.10    0.50
  17   1   1    0.10    0.29
 -17   1  -1   -0.04    0.55
  17   1   1   -0.02    0.63
  17   1   1    0.42    0.23
  17   1   1   -0.03    0.27
  17   1   1    0.24    0.10
  17   1   1    0.05    0.21
  19  -1   1    0.32    0.26
  19  -1   1    0.48    0.20
  19  -1   1    0.69    0.28
  19  -1   1    0.13    0.26
  19  -1   1    0.48    0.24
 -19  -1  -1    0.45    0.29
  19  -1   1    0.41    0.11
  19   1   1    0.29    0.11
  19   1   1    0.62    0.30
  19   1   1    0.40    0.24
  19   1   1    0.45    0.25
  19   1   1    0.25    0.20
 -19   1  -1    0.47    0.30
  19   1   1    0.51    0.27
  21  -1   1   -0.17    0.25
  21  -1   1   -0.05    0.24
  21  -1   1   -0.22    0.19
 -21  -1  -1    0.00    0.25
  21  -1   1    0.04    0.10
  21   1   1   -0.11    0.09
  21   1   1   -0.10    0.26
  21   1   1    0.02    0.30
 -21   1  -1   -0.12    0.24
  21   1   1   -0.10    0.20
  20  -2  -1   -0.03    0.09
 -20  -2   1    0.02    0.30
  20  -2  -1    0.30    0.28
  20  -2  -1    0.17    0.26
  20  -2  -1   -0.08    0.23
  20  -2  -1    0.08    0.26
  20  -2  -1    0.20    0.19
  20   2  -1    0.26    0.33
  20   2  -1    0.04    0.22
 -20   2   1   -0.14    0.30
  20   2  -1    0.11    0.24
  20   2  -1    0.02    0.25
  20   2  -1    0.02    0.10
  20   2  -1    0.17    0.31
  18  -2  -1    2.08    0.30
 -18  -2   1    1.61    0.32
 -18  -2   1    1.85    0.61
  18  -2  -1    1.95    0.45
  18  -2  -1    2.19    0.37
  18  -2  -1    1.78    1.04
  18  -2  -1    1.87    0.32
  18  -2  -1    1.45    0.59
  18  -2  -1    1.75    0.26
  18  -2  -1    1.97    0.20
  18   2  -1    2.38    0.38
  18   2  -1    1.80    0.33
 -18   2   1    2.34    0.74
 -18   2   1    2.44    0.37
  18   2  -1    2.61    0.32
  18   2  -1    1.84    0.21
  18   2  -1    2.12    0.28
  18   2  -1    1.98    0.41
  18   2  -1    2.39    0.35
  16  -2  -1    2.41    0.38
  16  -2  -1    2.99    0.60
 -16  -2   1    3.08    0.45
 -16  -2   1    3.48    0.72
  16  -2  -1    1.84    0.61
  16  -2  -1    3.58    0.40
  16  -2  -1    3.26    0.44
  16  -2  -1    3.02    0.25
  16  -2  -1    3.13    0.41
  16  -2  -1    2.75    0.36
  16  -2  -1    2.53    0.30
  16   2  -1    2.86    0.37
  16   2  -1    2.79    0.25
  16   2  -1    1.99    0.67
  16   2  -1    2.68    0.43
  16   2  -1    3.01    0.41
  16   2  -1    2.68    0.30
 -16   2   1    4.01    0.84
  16   2  -1    3.20    0.41
  14  -2  -1    1.99    0.20
  14  -2  -1    2.57    0.36
  14  -2  -1    2.28    0.33
 -14  -2   1    2.36    0.56
  14  -2  -1    1.92    0.24
  14  -2  -1    2.47    0.52
  14  -2  -1    1.65    0.52
  14  -2  -1    2.83    0.40
  14  -2  -1    2.21    0.48
  14  -2  -1    2.44    0.30
  14  -2  -1    2.44    0.36
  14  -2  -1    2.84    0.36
 -14   2   1    2.26    0.66
  14   2  -1    2.85    0.38
  14   2  -1    2.52    0.37
  14   2  -1    2.45    0.22
  14   2  -1    2.61    0.28
  14   2  -1    2.23    0.32
  14   2  -1    2.63    0.62
  14   2  -1    2.25    0.44
  14   2  -1    2.40    0.35
  14   2  -1    2.34    0.30
  14   2  -1    2.13    0.52
 -12  -2   1   23.84    5.37
  12  -2  -1   30.62    1.93
  12  -2  -1   29.27    2.16
  12  -2  -1   28.99    1.92
  12  -2  -1   29.90    2.31
  12  -2  -1   29.05    1.92
  12  -2  -1   32.30    1.97
  12  -2  -1   30.69    1.93
  12  -2  -1   25.77    2.18
  12  -2  -1   31.20    1.90
  12   2  -1   30.60    1.91
  12   2  -1   36.15    4.63
 -12   2   1   27.49    1.98
  12   2  -1   31.79    2.01
  12   2  -1   30.81    1.95
  12   2  -1   28.07    2.16
  12   2  -1   27.43    2.08
 -12   2   1   33.95    2.28
  12   2  -1   32.46    2.11
 -12   2   1   27.22    2.08
  12   2  -1   31.38    1.93
  10  -2  -1   43.45    2.94
  10  -2  -1   43.94    2.79
  10  -2  -1   43.16    2.86
 -10  -2   1   39.74    2.88
  10  -2  -1   46.28    2.87
 -10  -2   1   39.53    3.03
  10  -2  -1   45.03    2.76
  10  -2  -1   47.24    6.24
  10  -2  -1   44.67    2.81
  10  -2  -1   44.18    2.74
  10  -2  -1   46.59    3.50
  10  -2  -1   51.21    6.18
 -10  -2   1   35.35    4.18
 -10  -2   1   45.56    2.89
  10  -2  -1   42.09    2.73
 -10  -2   1   40.41    2.83
 -10   2   1   42.69    2.89
  10   2  -1   41.96    4.11
  10   2  -1   42.18    2.76
  10   2  -1   46.81    2.77
 -10   2   1   56.00    6.78
 -10   2   1   41.06    2.85
  10   2  -1   46.47    2.83
 -10   2   1   41.02    2.96
  10   2  -1   46.19    3.94
 -10   2   1   41.52    2.84
 -10   2   1   40.33    2.85
  10   2  -1   46.63    2.81
 -10   2   1   40.53    4.57
 -10   2   1   46.02    3.03
  10   2  -1   45.20    2.89
  10   2  -1   41.99    2.93
  10   2  -1   47.02    2.88
  -8  -2   1   23.66    1.70
   8  -2  -1   25.92    1.63
   8  -2  -1   25.86    1.64
  -8  -2   1   27.41    1.59
  -8  -2   1   23.44    2.70
  -8  -2   1   28.44    1.75
   8  -2  -1   22.02    2.64
   8  -2  -1   24.66    1.74
  -8  -2   1   25.35    1.58
  -8  -2   1   21.96    1.73
   8  -2  -1   27.14    1.87
   8  -2  -1   24.67    1.69
  -8  -2   1   24.84    1.67
  -8  -2   1   21.41    2.56
  -8  -2   1   22.98    1.72
   8   2  -1   25.01    1.68
   8   2  -1   22.93    2.45
  -8   2   1   24.40    2.89
  -8   2   1   24.94    1.62
  -8   2   1   24.51    1.64
   8   2  -1   24.04    1.55
   8   2  -1   24.17    1.64
   8   2  -1   25.51    1.59
  -8   2   1   24.11    1.72
   8   2  -1   22.41    1.64
  -8   2   1   25.76    1.65
   8   2  -1   25.85    2.35
   8   2  -1   25.09    1.60
   6  -2  -1   46.61    2.78
  -6  -2   1   39.02    2.86
  -6  -2   1   44.01    2.87
  -6  -2   1   44.71    2.85
  -6  -2   1   41.92    2.84
   6  -2  -1   45.62    2.85
   6  -2  -1   42.70    3.59
  -6  -2   1   42.11    2.81
   6  -2  -1   42.20    2.81
   6  -2  -1   41.78    2.80
   6  -2  -1   47.63    2.84
  -6  -2   1   47.14    2.78
  -6  -2   1   45.71    3.55
   6  -2  -1   45.21    2.79
   6  -2  -1   40.26    2.77
  -6  -2   1   46.55    3.57
   6  -2  -1   48.01    2.89
  -6   2   1   40.16    2.82
  -6   2   1   41.55    2.80
  -6   2   1   43.89    3.71
   6   2  -1   43.38    3.01
  -6   2   1   46.87    3.75
   6   2  -1   41.63    2.77
  -6   2   1   45.75    2.85
  -6   2   1   44.86    3.86
   6   2  -1   43.26    2.79
   6   2  -1   40.13    2.76
   6   2  -1   43.37    3.37
   6   2  -1   47.19    2.82
  -6   2   1   47.75    2.83
  -6   2   1   45.70    2.87
  -6   2   1   42.71    2.80
  -6   2   1   43.79    2.82
   4  -2  -1  120.46    7.13
  -4  -2   1  113.46    7.13
  -4  -2   1  122.82    7.89
   4  -2  -1  102.04    7.09
  -4  -2   1  101.83    7.10
  -4  -2   1  120.67    7.12
   4   2  -1  126.01    7.70
  -4   2   1  106.98    8.06
   4   2  -1  109.34    7.32
  -4   2   1  117.14    7.33
  -4   2   1  125.07    7.36
  -4   2   1  109.27    7.34
  -4   2   1  121.70    7.98
   2  -2  -1   21.86    1.76
   2  -2  -1   20.34    1.41
   2  -2  -1   21.63    1.29
   2  -2  -1   19.52    1.28
   2  -2  -1   20.58    1.28
  -2  -2   1   17.85    1.29
  -2  -2   1   19.63    1.29
   2  -2  -1   21.17    1.30
  -2  -2   1   18.46    1.49
  -2  -2   1   21.40    1.42
  -2   2   1   20.02    1.24
   2   2  -1   19.64    1.23
  -2   2   1   21.19    1.24
  -2   2   1   19.14    1.28
   2   2  -1   17.94    1.42
   2   2  -1   18.23    1.45
   0  -2   1    1.29    0.44
   0  -2   1    1.04    0.10
   0  -2  -1    1.00    0.07
   0  -2  -1    0.88    0.11
   0  -2  -1    0.64    0.30
   0  -2  -1    0.96    0.23
   0  -2   1    0.93    0.40
   0  -2  -1    0.93    0.08
   0  -2  -1    0.91    0.10
   0  -2   1    0.86    0.14
   0  -2  -1    0.93    0.30
   0  -2   1    0.81    0.10
   0   2   1    0.54    0.30
   0   2  -1    1.16    0.39
   0   2  -1    0.97    0.10
   0   2   1    0.75    0.11
   0   2  -1    0.77    0.09
   0   2  -1    0.86    0.12
   0   2   1    0.79    0.06
   0   2  -1    0.80    0.11
   0   2  -1    0.50    0.35
   0   2   1    0.97    0.27
   0   2   1    0.87    0.07
   0   2  -1    0.67    0.06
   2  -2   1   51.81    3.00
   2  -2   1   46.67    3.04
   2  -2   1   44.14    2.97
   2  -2   1   41.32    3.07
  -2  -2  -1   51.45    3.01
   2  -2   1   50.00    3.50
  -2  -2  -1   45.37    3.02
  -2  -2  -1   48.29    3.33
   2   2   1   52.31    3.01
  -2   2  -1   47.52    3.08
  -2   2  -1   44.34    3.04
   2   2   1   48.37    3.41
  -2   2  -1   45.43    3.60
  -2   2  -1   45.35    3.01
   2   2   1   45.38    2.99
  -2   2  -1   49.90    3.02
  -2   2  -1   48.42    3.78
  -2   2  -1   50.04    3.04
   4  -2   1    6.00    0.53
   4  -2   1    7.40    1.31
  -4  -2  -1    5.70    0.39
   4  -2   1    6.07    0.40
  -4  -2  -1    3.84    0.81
  -4  -2  -1    5.44    0.51
  -4  -2  -1    4.96    0.50
  -4  -2  -1    5.73    1.25
   4   2   1    6.10    0.48
  -4   2  -1    6.72    0.58
   4   2   1    5.35    0.42
   4   2   1    7.46    1.28
   4   2   1    8.49    1.24
  -4   2  -1    5.24    1.16
  -4   2  -1    5.58    0.50
  -4   2  -1    6.36    0.57
   4   2   1    6.45    0.46
   6  -2   1    5.27    1.37
  -6  -2  -1    6.37    0.60
   6  -2   1    6.98    0.56
  -6  -2  -1    6.29    1.19
   6  -2   1    7.22    0.51
   6  -2   1    7.88    0.62
   6  -2   1    5.68    1.43
  -6  -2  -1    6.66    0.57
  -6  -2  -1    5.88    0.61
  -6  -2  -1    7.30    0.61
   6   2   1    5.75    0.42
   6   2   1    7.06    1.31
  -6   2  -1    5.12    1.51
   6   2   1    6.21    0.46
  -6   2  -1    5.47    1.27
   6   2   1    5.21    0.40
   6   2   1    4.36    1.15
   8  -2   1   37.47    2.42
   8  -2   1   34.80    2.38
   8  -2   1   40.73    2.68
   8  -2   1   39.07    2.49
   8  -2   1   32.20    3.68
   8  -2   1   40.17    4.01
   8  -2   1   40.75    2.45
  -8  -2  -1   37.61    3.55
   8  -2   1   37.45    2.55
   8  -2   1   37.67    2.39
   8  -2   1   39.62    2.43
   8  -2   1   38.99    2.50
  -8  -2  -1   38.10    4.00
  -8  -2  -1   33.53    2.64
   8   2   1   38.56    3.58
   8   2   1   35.66    2.34
  -8   2  -1   37.06    2.35
  -8   2  -1   34.49    4.35
   8   2   1   37.57    2.30
  -8   2  -1   33.07    2.45
   8   2   1   35.85    2.29
   8   2   1   30.02    3.39
  -8   2  -1   38.04    2.33
   8   2   1   36.37    2.41
  -8   2  -1   35.88    2.38
   8   2   1   35.12    2.35
   8   2   1   34.19    2.25
  10  -2   1   11.95    2.80
  10  -2   1   10.90    0.79
 -10  -2  -1   11.40    2.60
  10  -2   1   11.33    0.75
  10  -2   1   11.44    1.00
  10  -2   1   12.04    0.81
 -10  -2  -1    9.68    2.05
  10  -2   1   10.97    0.90
 -10  -2  -1    9.59    0.89
  10  -2   1   12.76    0.84
  10  -2   1   11.02    0.73
  10  -2   1   11.47    0.92
  10   2   1   10.39    2.44
 -10   2  -1   10.23    0.92
  10   2   1   10.02    0.92
 -10   2  -1   10.34    0.80
 -10   2  -1    7.91    1.98
  10   2   1   11.16    1.09
  10   2   1   11.43    0.71
 -10   2  -1    7.72    2.12
  10   2   1   12.03    0.77
  10   2   1    7.61    2.21
 -10   2  -1   10.41    0.80
  10   2   1   11.88    0.79
  10   2   1   10.20    0.69
  12  -2   1    6.25    0.43
  12  -2   1    5.26    0.64
  12  -2   1    5.15    0.73
  12  -2   1    5.99    0.39
 -12  -2  -1    6.35    0.76
  12  -2   1    5.70    0.46
  12  -2   1    5.21    0.47
  12  -2   1    5.16    0.48
  12  -2   1    5.47    0.50
  12   2   1    5.64    0.55
  12   2   1    5.75    0.37
  12   2   1    5.82    0.47
 -12   2  -1    3.80    0.75
  12   2   1    5.90    0.42
 -12   2  -1    4.99    0.45
 -12   2  -1    4.90    0.49
 -12   2  -1    5.09    0.72
  12   2   1    4.33    0.71
  12   2   1    5.89    0.49
  12   2   1    4.37    0.65
  14  -2   1    2.98    0.65
 -14  -2  -1    3.86    0.46
  14  -2   1    3.93    0.37
  14  -2   1    3.07    0.44
 -14  -2  -1    4.65    0.74
  14  -2   1    4.64    0.30
  14  -2   1    3.54    0.59
  14  -2   1    3.92    0.43
  14  -2   1    4.36    0.47
  14   2   1    3.72    0.73
 -14   2  -1    4.22    0.80
  14   2   1    3.33    0.63
  14   2   1    4.42    0.31
  14   2   1    4.55    0.45
  14   2   1    3.62    0.37
  14   2   1    3.89    0.43
  14   2   1    4.63    0.45
  16  -2   1    0.54    0.21
  16  -2   1    0.78    0.22
  16  -2   1    0.37    0.43
  16  -2   1    0.59    0.25
 -16  -2  -1    0.15    0.51
  16  -2   1    0.36    0.10
  16  -2   1    0.37    0.27
  16  -2   1    0.85    0.29
  16  -2   1    0.58    0.55
  16  -2   1    0.56    0.28
  16   2   1    0.48    0.26
  16   2   1    0.45    0.20
  16   2   1    0.49    0.21
  16   2   1    0.29    0.22
 -16   2  -1    0.72    0.63
  16   2   1   -0.30    0.53
  16   2   1    0.45    0.11
  16   2   1    0.49    0.28
 -18  -2  -1    0.53    0.60
  18  -2   1    0.36    0.22
  18  -2   1    0.69    0.23
 -18  -2  -1    0.32    0.23
  18  -2   1    0.32    0.19
  18  -2   1    0.06    0.65
  18  -2   1    0.34    0.23
  18  -2   1    0.45    0.22
  18  -2   1    0.54    0.13
  18   2   1    0.47    0.19
 -18   2  -1    0.36    0.25
  18   2   1    0.31    0.26
  18   2   1    0.24    0.24
  18   2   1    0.56    0.11
 -18   2  -1   -0.16    0.64
  18   2   1    0.84    0.24
  18   2   1    0.38    0.24
  20  -2   1    0.45    0.25
 -20  -2  -1    0.29    0.27
  20  -2   1    1.07    0.32
  20  -2   1    0.19    0.21
  20   2   1    0.60    0.12
 -20   2  -1    0.44    0.32
  20   2   1    0.34    0.26
  20   2   1    0.28    0.23
  20   2   1    0.64    0.27
  20   2   1    0.91    0.35
 -21  -3   1    0.39    0.34
  21  -3  -1    0.60    0.28
  21  -3  -1    0.78    0.32
  21  -3  -1    0.70    0.10
  21   3  -1    0.08    0.39
  21   3  -1    0.90    0.14
  21   3  -1    0.56    0.34
 -21   3   1    0.61    0.33
  21   3  -1    0.69    0.28
  19  -3  -1    0.51    0.22
  19  -3  -1   -0.14    0.24
  19  -3  -1    0.07    0.20
  19  -3  -1   -1.17    0.67
  19  -3  -1    0.24    0.26
  19  -3  -1    0.15    0.09
 -19  -3   1    0.15    0.28
  19  -3  -1    0.24    0.22
  19   3  -1    0.00    0.22
  19   3  -1    0.08    0.10
 -19   3   1    0.24    0.26
  19   3  -1    0.32    0.24
  19   3  -1    0.30    0.23
  19   3  -1    0.00    0.22
  19   3  -1   -0.18    0.18
 -17  -3   1    0.21    0.24
  17  -3  -1   -0.10    0.48
  17  -3  -1    0.13    0.10
  17  -3  -1    0.16    0.20
  17  -3  -1    0.13    0.19
  17  -3  -1    0.13    0.26
  17  -3  -1   -0.12    0.29
  17  -3  -1   -0.12    0.42
 -17  -3   1    1.15    0.53
  17  -3  -1    0.00    0.27
  17  -3  -1    0.07    0.20
  17   3  -1    0.20    0.23
  17   3  -1    0.22    0.24
  17   3  -1    0.25    0.28
  17   3  -1    0.14    0.10
  17   3  -1    0.35    0.66
  17   3  -1    0.20    0.22
 -17   3   1    0.17    0.25
 -17   3   1   -0.53    0.59
  17   3  -1    0.20    0.19
  17   3  -1    0.27    0.19
  15  -3  -1    0.46    0.43
  15  -3  -1    0.26    0.46
  15  -3  -1    0.61    0.25
  15  -3  -1    0.48    0.21
  15  -3  -1    0.51    0.24
  15  -3  -1    0.37    0.17
 -15  -3   1    0.54    0.44
 -15  -3   1    0.65    0.26
  15  -3  -1    0.52    0.20
  15  -3  -1    0.30    0.18
  15  -3  -1    0.31    0.09
  15   3  -1    0.57    0.23
  15   3  -1    0.53    0.21
  15   3  -1    0.29    0.46
  15   3  -1    0.42    0.16
  15   3  -1    0.28    0.27
  15   3  -1    0.40    0.10
 -15   3   1   -0.66    0.47
  13  -3  -1    6.89    0.61
  13  -3  -1    6.00    0.71
  13  -3  -1    6.16    0.72
  13  -3  -1    6.28    0.56
 -13  -3   1    4.99    0.76
 -13  -3   1    6.47    0.50
  13  -3  -1    6.76    0.52
  13  -3  -1    6.75    0.45
  13  -3  -1    7.08    0.58
 -13  -3   1    7.63    0.91
  13  -3  -1    5.71    0.81
  13  -3  -1    7.04    0.54
  13  -3  -1    6.24    0.57
  13   3  -1    7.90    0.61
 -13   3   1    5.64    0.77
  13   3  -1    5.41    0.82
 -13   3   1    7.51    0.93
  13   3  -1    7.64    0.57
 -13   3   1    5.26    0.89
  13   3  -1    5.78    0.76
  13   3  -1    6.93    0.46
  13   3  -1    7.64    0.61
  13   3  -1    7.11    0.58
  13   3  -1    6.30    0.67
 -11  -3   1    1.88    1.33
  11  -3  -1    1.67    0.40
 -11  -3   1    2.11    0.46
  11  -3  -1    1.68    0.22
  11  -3  -1    1.80    0.26
 -11  -3   1    1.69    0.53
  11  -3  -1    0.64    3.08
  11  -3  -1    2.44    0.41
 -11  -3   1    2.17    1.51
  11  -3  -1    1.53    0.26
  11  -3  -1    1.49    0.16
  11  -3  -1    2.07    0.37
  11  -3  -1    2.20    0.26
 -11  -3   1    2.00    0.41
 -11  -3   1    1.72    0.40
  11  -3  -1    2.38    1.18
 -11   3   1    2.43    0.51
  11   3  -1    1.86    0.17
  11   3  -1    2.24    1.37
  11   3  -1    2.29    0.35
 -11   3   1    2.03    0.31
 -11   3   1    2.19    0.52
  11   3  -1    2.37    1.06
  11   3  -1    2.07    0.50
  11   3  -1    2.04    0.29
 -11   3   1    1.65    0.40
  11   3  -1    2.41    0.40
 -11   3   1    1.86    0.35
  11   3  -1    1.95    0.28
  11   3  -1    2.26    0.21
 -11   3   1    1.81    0.46
  -9  -3   1   41.19    2.79
   9  -3  -1   46.32    2.68
   9  -3  -1   46.08    2.74
  -9  -3   1   43.63    2.79
   9  -3  -1   38.12    2.65
  -9  -3   1   38.21    2.83
  -9  -3   1   38.55    4.08
   9  -3  -1   43.92    2.71
   9  -3  -1   38.14    4.94
   9  -3  -1   46.37    4.23
  -9  -3   1   38.30    2.72
  -9  -3   1   45.02    2.83
   9   3  -1   41.75    2.94
  -9   3   1   44.50    2.88
   9   3  -1   41.82    2.76
  -9   3   1   44.57    4.39
  -9   3   1   48.29    2.97
   9   3  -1   45.77    2.91
   9   3  -1   45.82    2.85
  -9   3   1   47.75    2.88
   9   3  -1   42.85    3.96
  -9   3   1   39.93    2.83
   9   3  -1   42.18    2.80
   9   3  -1   42.78    3.97
  -9   3   1   45.68    4.51
   9   3  -1   41.81    2.81
  -7  -3   1   36.38    2.53
   7  -3  -1   39.31    2.57
   7  -3  -1   35.13    3.41
   7  -3  -1   37.24    2.52
   7  -3  -1   42.12    2.44
  -7  -3   1   38.02    2.47
  -7  -3   1   41.70    2.56
  -7  -3   1   36.89    3.30
   7  -3  -1   42.14    2.47
   7  -3  -1   38.18    2.43
   7  -3  -1   39.99    2.48
  -7  -3   1   38.15    3.32
   7  -3  -1   35.77    2.44
   7  -3  -1   36.90    2.52
   7   3  -1   34.12    2.46
   7   3  -1   38.83    2.52
  -7   3   1   40.65    2.54
  -7   3   1   38.08    3.61
   7   3  -1   41.58    2.49
   7   3  -1   37.17    3.15
  -7   3   1   41.59    2.52
   7   3  -1   40.55    2.55
   7   3  -1   42.17    2.49
   7   3  -1   39.42    3.06
  -7   3   1   37.75    2.59
  -7   3   1   38.56    2.52
  -7   3   1   34.44    3.58
   5  -3  -1  188.55   12.55
   5  -3  -1  203.50   12.60
  -5  -3   1  199.38   13.12
  -5  -3   1  218.32   13.10
  -5  -3   1  186.31   12.60
  -5  -3   1  197.54   12.60
   5  -3  -1  213.06   13.38
  -5   3   1  202.31   13.53
   5   3  -1  214.13   13.05
  -5   3   1  197.14   13.74
   5   3  -1  185.88   12.70
   5   3  -1  211.06   13.12
  -5   3   1  199.26   12.71
  -5   3   1  208.71   13.57
  -3  -3   1  318.53   21.32
  -3  -3   1  362.74   21.33
  -1  -3   1   17.67    1.41
   1  -3  -1   19.11    1.49
  -1  -3   1   17.32    1.15
   1  -3  -1   18.65    1.15
  -1  -3   1   16.95    1.17
  -1  -3   1   16.01    1.15
   1  -3  -1   16.88    1.48
   1  -3  -1   19.21    1.15
   1  -3  -1   17.84    1.16
   1  -3  -1   19.82    1.40
   1  -3  -1   17.90    1.14
   1  -3  -1   17.74    1.15
   1  -3  -1   19.70    1.16
  -1   3   1   16.79    0.98
   1   3  -1   15.04    0.99
  -1   3   1   14.41    0.98
   1   3  -1   15.08    1.00
  -1   3   1   15.91    0.98
  -1   3   1   16.96    1.38
   1   3  -1   16.45    1.27
   1   3  -1   14.29    0.97
   1  -3   1   29.45    1.91
   1  -3   1   30.21    1.86
   1  -3   1   31.49    2.32
   1  -3   1   29.62    1.85
  -1  -3  -1   29.69    2.10
   1  -3   1   27.14    1.85
  -1  -3  -1   29.38    1.89
  -1  -3  -1   27.95    1.85
  -1  -3  -1   30.16    1.87
  -1   3  -1   30.47    1.78
   1   3   1   25.25    1.95
  -1   3  -1   29.04    1.76
  -1   3  -1   29.19    1.74
   1   3   1   24.33    1.73
  -1   3  -1   25.60    2.26
  -3  -3  -1   74.92    4.61
   3  -3   1   66.35    4.59
   3  -3   1   77.44    5.40
   3  -3   1   72.72    4.56
   3  -3   1   72.48    5.25
  -3  -3  -1   69.95    4.62
  -3  -3  -1   81.56    4.96
  -3  -3  -1   69.24    4.94
   3  -3   1   71.71    4.59
  -3  -3  -1   70.63    4.56
   3  -3   1   66.75    4.65
   3  -3   1   75.39    4.62
  -3  -3  -1   76.99    4.61
   3   3   1   69.60    4.35
   3   3   1   74.17    4.35
   3   3   1   67.28    4.33
  -3   3  -1   71.94    4.37
  -3   3  -1   65.94    4.36
  -3   3  -1   65.63    5.17
  -3   3  -1   71.73    4.39
  -3   3  -1   67.93    5.16
  -3   3  -1   67.24    4.41
   3   3   1   71.55    4.34
  -3   3  -1   65.20    4.37
   5  -3   1    7.37    0.53
  -5  -3  -1    8.18    0.52
  -5  -3  -1    7.95    1.15
  -5  -3  -1    7.12    0.62
   5  -3   1    7.51    0.66
  -5  -3  -1    7.27    1.34
  -5  -3  -1    7.11    0.64
   5  -3   1    8.00    0.55
   5  -3   1   10.16    1.52
   5  -3   1    7.64    0.50
  -5   3  -1    8.69    0.72
  -5   3  -1    5.74    1.22
  -5   3  -1    8.58    1.71
   5   3   1    8.13    0.56
  -5   3  -1    9.43    0.65
  -5   3  -1    9.46    0.62
   5   3   1    9.49    1.36
   5   3   1    7.53    0.55
   5   3   1    7.25    0.60
   7  -3   1   18.62    1.21
  -7  -3  -1   20.64    2.14
   7  -3   1   17.52    2.40
  -7  -3  -1   17.59    1.37
   7  -3   1   19.22    1.28
   7  -3   1   18.52    1.22
  -7  -3  -1   19.09    1.18
  -7  -3  -1   16.90    1.31
   7  -3   1   17.66    1.40
  -7  -3  -1   17.15    1.31
   7  -3   1   21.16    2.61
   7  -3   1   17.87    1.22
   7  -3   1   19.41    1.29
   7  -3   1   17.14    1.47
   7   3   1   17.32    1.12
  -7   3  -1   16.24    1.29
  -7   3  -1   17.17    1.18
   7   3   1   15.86    2.09
   7   3   1   15.83    1.15
   7   3   1   16.58    1.09
  -7   3  -1   16.03    1.22
  -7   3  -1   18.15    1.21
   7   3   1   19.27    1.24
   7   3   1   17.13    1.23
   7   3   1   20.71    2.17
  -7   3  -1   15.31    2.64
  -7   3  -1   17.80    1.18
  -7   3  -1   15.70    2.49
   9  -3   1    7.55    0.64
   9  -3   1    7.38    0.72
   9  -3   1    4.66    2.44
   9  -3   1    7.72    0.53
  -9  -3  -1    6.41    0.85
   9  -3   1    5.82    1.84
  -9  -3  -1    5.55    0.58
   9  -3   1    7.50    0.65
   9  -3   1    7.55    0.56
  -9  -3  -1    3.86    1.69
   9  -3   1    7.07    0.47
   9  -3   1    5.75    0.81
   9  -3   1    6.87    0.53
  -9  -3  -1    5.77    0.74
  -9  -3  -1    5.94    1.40
   9  -3   1    6.33    0.45
  -9  -3  -1    5.67    0.71
  -9   3  -1    3.81    1.87
   9   3   1    7.09    0.64
   9   3   1    6.87    0.47
  -9   3  -1    5.99    0.68
  -9   3  -1    6.04    0.79
   9   3   1    6.89    0.52
  -9   3  -1    6.28    0.62
   9   3   1    5.96    1.84
   9   3   1    7.33    0.54
  -9   3  -1    7.48    0.61
   9   3   1    8.44    1.97
  -9   3  -1   11.19    4.05
  -9   3  -1    7.67    0.63
   9   3   1    7.23    0.61
  -9   3  -1    5.07    2.24
   9   3   1    7.58    0.70
  11  -3   1    2.34    0.33
  11  -3   1    2.67    0.30
  11  -3   1    2.32    0.47
  11  -3   1    3.07    0.27
  11  -3   1    2.63    0.30
  11  -3   1    2.35    0.26
  11  -3   1    3.19    0.34
 -11  -3  -1    1.77    1.34
 -11  -3  -1    3.25    0.38
 -11  -3  -1    0.19    1.47
  11  -3   1    2.80    0.47
 -11  -3  -1    3.70    0.59
  11   3   1    3.11    0.50
  11   3   1    2.68    0.22
 -11   3  -1    3.29    0.55
 -11   3  -1    3.10    0.40
 -11   3  -1    2.66    0.39
  11   3   1    3.33    0.26
  11   3   1    1.77    1.60
  11   3   1    2.93    0.52
  13  -3   1    1.43    0.45
  13  -3   1    1.38    0.27
  13  -3   1    2.19    0.47
 -13  -3  -1    1.61    0.23
  13  -3   1    1.89    0.26
  13  -3   1    1.79    0.22
  13  -3   1    2.28    0.35
  13  -3   1    2.19    0.32
 -13  -3  -1    1.81    0.47
  13  -3   1    1.72    0.18
 -13   3  -1    1.80    0.30
  13   3   1    2.36    0.36
 -13   3  -1    0.78    0.59
  13   3   1    1.73    0.20
  13   3   1    1.72    0.24
  13   3   1    1.75    0.26
  13   3   1    1.65    0.18
  13   3   1    1.67    0.53
 -15  -3  -1    1.36    0.55
  15  -3   1    0.50    0.27
 -15  -3  -1    1.12    0.23
  15  -3   1    0.83    0.12
  15  -3   1    0.47    0.43
  15  -3   1    0.47    0.47
  15  -3   1    0.58    0.21
  15  -3   1    0.73    0.22
  15  -3   1    0.73    0.19
  15  -3   1    0.79    0.21
  15  -3   1    0.76    0.31
  15   3   1    0.53    0.68
  15   3   1    0.66    0.22
 -15   3  -1    0.43    0.55
  15   3   1    0.87    0.12
  15   3   1    0.85    0.23
  15   3   1    0.81    0.18
  15   3   1    0.50    0.21
  15   3   1    0.59    0.22
  17  -3   1    0.30    0.19
  17  -3   1    0.17    0.09
  17  -3   1    0.14    0.22
  17  -3   1    0.42    0.23
  17  -3   1    0.26    0.59
  17  -3   1    0.28    0.22
 -17  -3  -1    0.21    0.25
  17  -3   1   -0.12    0.46
 -17  -3  -1   -0.39    0.48
  17  -3   1   -0.08    0.30
  17  -3   1    0.15    0.23
  17   3   1    0.14    0.10
  17   3   1    0.12    0.22
  17   3   1    0.28    0.24
 -17   3  -1    0.88    0.63
  17   3   1    0.11    0.26
  17   3   1    0.37    0.22
  17   3   1    0.16    0.18
  19  -3   1    0.83    0.21
 -19  -3  -1    0.41    0.28
  19  -3   1    0.67    0.25
  19  -3   1    1.14    0.27
  19  -3   1    0.81    0.12
  19  -3   1    0.55    0.25
  19   3   1    0.33    0.20
  19   3   1    0.89    0.22
 -19   3  -1    0.53    0.31
  19   3   1    1.51    0.36
  19   3   1    0.52    0.25
  19   3   1    1.06    0.32
  19   3   1    0.83    0.13
  20  -4  -1    0.40    0.28
  20  -4  -1    0.31    0.28
 -20  -4   1   -0.02    0.27
  20  -4  -1    0.40    0.26
  20  -4  -1    0.52    0.25
  20  -4  -1    0.54    0.26
  20  -4  -1    0.15    0.09
 -20   4   1    0.45    0.33
  20   4  -1    0.15    0.11
  20   4  -1    0.30    0.34
  20   4  -1    0.22    0.22
  20   4  -1    0.33    0.26
  20   4  -1    0.03    0.26
  20   4  -1    0.48    0.34
  18  -4  -1    0.10    0.53
  18  -4  -1    0.66    0.20
  18  -4  -1    0.88    0.23
  18  -4  -1    1.02    0.23
  18  -4  -1    0.79    0.26
  18  -4  -1    0.46    0.25
 -18  -4   1    0.41    0.24
  18  -4  -1    0.53    0.11
  18   4  -1    0.62    0.36
  18   4  -1    0.83    0.13
  18   4  -1    0.69    0.21
  18   4  -1    0.83    0.23
  18   4  -1    0.55    0.24
  18   4  -1    0.66    0.27
  18   4  -1    1.09    0.26
 -18   4   1    0.51    0.72
 -18   4   1    0.69    0.27
 -16  -4   1    1.95    0.35
  16  -4  -1    1.68    0.32
  16  -4  -1    2.21    0.31
  16  -4  -1    1.59    0.52
  16  -4  -1    1.00    0.54
  16  -4  -1    1.53    0.36
  16  -4  -1    1.65    0.25
 -16  -4   1    2.05    0.57
  16  -4  -1    1.81    0.26
  16  -4  -1    1.54    0.19
  16  -4  -1    2.18    0.28
  16  -4  -1    2.13    0.34
  16   4  -1    1.58    0.20
  16   4  -1    1.56    0.23
  16   4  -1    1.64    0.23
  16   4  -1    1.96    0.27
  16   4  -1    1.36    0.63
  16   4  -1    1.48    0.28
  16   4  -1    2.19    0.32
 -16   4   1    1.20    0.64
  14  -4  -1    1.82    0.31
 -14  -4   1    2.04    0.49
  14  -4  -1    2.27    0.37
  14  -4  -1    1.47    0.42
  14  -4  -1    2.12    0.32
  14  -4  -1    2.18    0.19
  14  -4  -1    1.43    0.23
 -14  -4   1    0.78    0.51
  14  -4  -1    1.73    0.47
  14  -4  -1    1.55    0.31
 -14  -4   1    2.36    0.41
  14  -4  -1    1.64    0.28
  14  -4  -1    1.75    0.50
  14  -4  -1    2.19    0.31
  14  -4  -1    2.02    0.23
  14   4  -1    2.29    0.26
  14   4  -1    1.54    0.55
  14   4  -1    1.90    0.44
  14   4  -1    2.29    0.31
 -14   4   1    1.02    0.45
  14   4  -1    2.02    0.23
  14   4  -1    2.38    0.35
  14   4  -1    1.87    0.29
  14   4  -1    2.22    0.20
 -14   4   1    2.70    0.65
  14   4  -1    2.24    0.27
 -12  -4   1    1.36    0.67
  12  -4  -1    2.42    0.25
 -12  -4   1    3.50    0.83
  12  -4  -1    1.96    0.27
  12  -4  -1    2.02    0.34
  12  -4  -1    1.71    0.18
  12  -4  -1    1.56    0.26
  12  -4  -1    1.27    0.55
 -12  -4   1    2.34    0.49
 -12  -4   1    2.20    0.45
 -12  -4   1    1.49    2.28
  12  -4  -1    2.13    0.43
  12  -4  -1    1.79    0.38
  12  -4  -1    2.40    0.28
  12   4  -1    2.67    0.30
  12   4  -1    2.06    0.18
  12   4  -1    1.69    0.28
 -12   4   1    1.83    0.49
  12   4  -1    2.56    0.24
 -12   4   1    2.09    0.45
 -12   4   1    1.67    0.49
  12   4  -1    1.64    1.74
 -12   4   1    1.97    0.37
  12   4  -1    1.29    1.42
 -12   4   1    2.68    0.39
  12   4  -1    1.86    0.42
  12   4  -1    2.34    0.50
  10  -4  -1    9.15    1.45
  10  -4  -1   10.73    0.81
  10  -4  -1   11.59    0.90
  10  -4  -1   10.56    0.78
  10  -4  -1    9.55    2.48
  10  -4  -1    9.92    1.91
 -10  -4   1    7.36    2.00
 -10  -4   1    9.64    0.90
  10  -4  -1   11.92    0.75
  10  -4  -1   10.52    0.96
  10  -4  -1   12.45    0.73
  10  -4  -1   10.82    0.88
  10   4  -1   10.92    0.75
 -10   4   1   10.50    0.98
 -10   4   1    6.61    2.41
  10   4  -1   11.02    0.91
 -10   4   1   11.45    0.85
  10   4  -1    8.44    1.55
 -10   4   1   12.03    0.90
 -10   4   1   11.84    0.82
  10   4  -1   10.00    0.76
  10   4  -1    7.26    1.78
 -10   4   1   10.23    0.81
  10   4  -1   11.33    0.71
  10   4  -1   10.07    0.82
   8  -4  -1    8.83    0.76
   8  -4  -1    8.92    0.66
  -8  -4   1   10.32    0.79
   8  -4  -1    9.48    0.64
   8  -4  -1   10.87    0.71
  -8  -4   1    9.78    0.80
  -8  -4   1    8.15    1.53
   8  -4  -1    9.27    0.76
  -8  -4   1    9.49    1.66
  -8  -4   1    9.93    0.78
   8  -4  -1   10.96    2.23
   8  -4  -1    8.85    0.84
   8  -4  -1    9.98    0.71
  -8   4   1    9.37    0.67
  -8   4   1    8.97    2.23
   8   4  -1    8.76    0.72
   8   4  -1    9.64    1.28
   8   4  -1    8.58    1.41
  -8   4   1    8.38    0.71
   8   4  -1    9.01    0.62
   8   4  -1    8.35    0.57
  -8   4   1    8.55    0.79
   8   4  -1    8.79    0.67
  -8   4   1    9.00    0.72
  -8   4   1    8.14    0.67
   8   4  -1    9.50    0.61
  -6  -4   1   76.61    5.18
  -6  -4   1   70.89    4.56
  -6  -4   1   64.40    5.12
   6  -4  -1   75.09    4.67
   6  -4  -1   74.17    4.61
   6  -4  -1   66.14    4.51
   6  -4  -1   73.73    5.52
  -6  -4   1   71.09    4.57
   6  -4  -1   74.63    4.58
  -6  -4   1   73.81    4.57
   6  -4  -1   74.81    4.54
   6  -4  -1   66.77    4.50
   6  -4  -1   72.70    4.53
   6  -4  -1   71.41    4.57
   6  -4  -1   69.83    4.51
   6   4  -1   67.47    4.28
   6   4  -1   72.32    4.73
  -6   4   1   69.67    4.33
  -6   4   1   59.79    4.27
   6   4  -1   66.93    4.30
  -6   4   1   71.91    5.46
  -6   4   1   78.64    5.76
  -6   4   1   68.14    4.35
  -6   4   1   69.86    4.38
   6   4  -1   61.72    4.27
  -6   4   1   71.12    5.38
  -4  -4   1  182.62   12.25
  -4  -4   1  199.65   12.25
   4  -4  -1  205.07   12.23
  -4  -4   1  205.83   12.26
   4  -4  -1  183.06   12.32
  -4   4   1  203.65   14.05
   4   4  -1  203.80   13.07
  -4   4   1  208.16   13.83
   4   4  -1  228.06   13.09
   4   4  -1  198.66   13.30
   4   4  -1  202.89   13.09
  -4   4   1  208.38   13.10
  -4   4   1  216.05   13.86
  -2  -4   1  304.84   20.04
   2  -4  -1  340.52   20.68
  -2  -4   1  316.81   20.19
   0  -4  -1   80.83    5.41
   0  -4  -1   82.63    5.14
   0  -4  -1   87.18    5.14
   0  -4  -1   89.93    5.43
   0  -4   1   76.14    5.12
   0  -4  -1   77.18    5.15
   0  -4   1   91.42    5.58
   0  -4   1   78.74    5.55
   0  -4   1   79.09    5.50
   0  -4  -1   78.16    5.34
   0  -4   1   78.15    5.13
   0  -4   1   82.39    5.16
   0   4   1   73.37    5.10
   0   4  -1   87.91    5.14
   0   4  -1   78.80    5.12
   0   4   1   80.17    5.19
   0   4  -1   87.41    5.12
  -2  -4  -1  129.38    8.64
  -2  -4  -1  147.75    8.44
  -2  -4  -1  123.37    8.43
   2  -4   1  124.61    8.47
   2  -4   1  136.96    9.02
  -2  -4  -1  136.00    8.64
   2  -4   1  126.68    8.41
   2  -4   1  151.59    9.18
  -2   4  -1  132.18    7.82
  -2   4  -1  127.62    7.82
  -2   4  -1  125.54    7.85
  -2   4  -1  120.68    8.54
  -2   4  -1  123.01    8.55
   2   4   1  115.16    8.06
   4  -4   1   27.76    1.71
   4  -4   1   26.60    2.52
  -4  -4  -1   29.50    2.35
  -4  -4  -1   24.99    1.69
   4  -4   1   26.23    1.67
   4  -4   1   23.52    1.63
  -4  -4  -1   24.63    2.05
  -4  -4  -1   24.81    1.62
   4  -4   1   25.56    1.65
  -4  -4  -1   22.97    1.69
  -4  -4  -1   24.86    1.69
   4  -4   1   25.22    1.75
   4  -4   1   26.53    1.68
   4  -4   1   25.03    1.63
   4  -4   1   29.78    2.69
   4   4   1   19.95    2.06
  -4   4  -1   22.68    1.56
   4   4   1   25.82    2.24
  -4   4  -1   23.80    2.53
  -4   4  -1   24.66    1.58
  -4   4  -1   25.41    2.64
  -4   4  -1   26.30    1.61
   4   4   1   24.18    1.53
   4   4   1   21.86    1.53
   4   4   1   24.84    1.55
  -4   4  -1   22.76    1.59
  -4   4  -1   24.81    1.65
   4   4   1   26.65    1.57
   6  -4   1   70.98    4.18
   6  -4   1   64.57    4.09
   6  -4   1   62.41    4.04
   6  -4   1   65.54    4.24
   6  -4   1   65.03    5.25
   6  -4   1   67.43    4.12
   6  -4   1   60.09    4.07
  -6  -4  -1   61.65    4.05
  -6  -4  -1   60.40    4.17
   6  -4   1   65.82    4.13
   6  -4   1   64.93    4.08
  -6   4  -1   56.86    3.77
   6   4   1   56.12    3.74
  -6   4  -1   58.96    3.84
   6   4   1   56.29    3.70
  -6   4  -1   67.93    5.30
   6   4   1   61.09    3.71
   6   4   1   59.22    3.76
  -6   4  -1   59.24    3.69
   6   4   1   63.22    3.74
  -6   4  -1   61.14    3.75
  -6   4  -1   56.75    3.74
   6   4   1   53.11    4.48
  -6   4  -1   54.73    5.08
   8  -4   1    1.46    1.19
   8  -4   1    1.76    1.29
   8  -4   1    2.04    0.34
   8  -4   1    2.33    0.37
  -8  -4  -1    0.99    1.02
  -8  -4  -1    1.33    0.36
  -8  -4  -1    1.85    0.40
   8  -4   1    1.54    0.35
  -8  -4  -1    2.23    0.45
   8  -4   1    2.30    0.29
  -8  -4  -1    1.49    0.70
   8  -4   1    1.65    0.25
   8  -4   1    1.98    0.16
   8  -4   1    1.92    0.28
  -8  -4  -1    1.66    0.90
   8  -4   1    2.04    0.21
   8  -4   1    1.75    0.20
   8  -4   1    2.13    0.63
   8   4   1    1.95    0.36
  -8   4  -1    1.42    0.34
  -8   4  -1    1.50    0.30
  -8   4  -1    1.94    1.13
   8   4   1    1.56    0.17
  -8   4  -1    1.23    0.42
   8   4   1    1.97    0.29
   8   4   1    1.66    0.21
  -8   4  -1    1.55    0.28
  -8   4  -1    0.36    0.99
  -8   4  -1    1.75    0.29
   8   4   1    1.91    1.14
   8   4   1    1.86    0.23
   8   4   1    2.13    1.00
  -8   4  -1    1.67    0.24
  -8   4  -1    1.20    1.11
  10  -4   1    8.24    0.84
 -10  -4  -1    7.85    0.85
  10  -4   1    8.40    0.80
 -10  -4  -1    6.49    2.28
  10  -4   1    8.73    0.63
  10  -4   1    8.44    1.06
 -10  -4  -1    7.90    1.25
  10  -4   1    8.30    0.58
  10  -4   1    9.66    0.61
  10  -4   1    9.78    0.67
  10  -4   1    9.54    0.66
  10   4   1    9.77    0.64
 -10   4  -1    8.35    0.73
  10   4   1    9.27    0.58
 -10   4  -1    8.27    0.94
  10   4   1    8.06    0.56
 -10   4  -1    8.85    0.70
 -10   4  -1    5.44    2.02
  10   4   1    8.87    0.83
 -10   4  -1    9.17    0.82
  10   4   1    5.54    1.84
 -10   4  -1    7.96    0.74
  12  -4   1    0.15    0.07
 -12  -4  -1    0.06    0.15
  12  -4   1    0.24    0.15
  12  -4   1   -0.01    0.30
  12  -4   1    0.17    0.18
 -12  -4  -1   -0.08    0.31
  12  -4   1    0.08    0.13
  12  -4   1   -0.07    0.21
  12  -4   1    0.30    0.34
  12  -4   1    0.19    0.15
  12   4   1    0.16    0.32
  12   4   1    0.16    0.14
 -12   4  -1    0.04    0.21
 -12   4  -1    0.02    0.22
 -12   4  -1    0.16    0.43
 -12   4  -1    0.16    0.47
  12   4   1    0.28    0.19
  12   4   1    0.17    0.07
  12   4   1    0.13    0.17
  12   4   1    0.15    0.16
 -14  -4  -1    0.03    0.21
  14  -4   1   -0.16    0.35
  14  -4   1   -0.13    0.19
  14  -4   1   -0.03    0.18
  14  -4   1   -0.02    0.17
  14  -4   1    0.34    0.24
  14  -4   1    0.20    0.25
  14  -4   1    0.07    0.08
  14  -4   1   -0.06    0.16
  14  -4   1   -0.04    0.40
 -14  -4  -1   -0.21    0.35
 -14   4  -1    0.96    0.52
  14   4   1   -0.13    0.43
  14   4   1   -0.06    0.14
  14   4   1   -0.09    0.22
 -14   4  -1    0.83    0.62
 -14   4  -1    0.06    0.22
 -14   4  -1   -0.06    0.51
  14   4   1   -0.03    0.19
  14   4   1    0.02    0.08
  14   4   1    0.01    0.17
  16  -4   1    1.39    0.34
  16  -4   1    1.51    0.30
  16  -4   1    2.30    0.36
 -16  -4  -1    1.56    0.52
  16  -4   1    2.97    0.38
  16  -4   1    1.98    0.30
  16  -4   1    2.40    0.39
  16  -4   1    1.15    0.30
  16  -4   1    1.38    0.58
  16  -4   1    2.07    0.20
  16  -4   1    1.64    0.48
 -16  -4  -1    2.39    0.37
 -16  -4  -1    2.52    0.43
  16   4   1    2.32    0.30
 -16   4  -1    1.69    0.70
  16   4   1    1.55    0.31
  16   4   1    2.19    0.28
  16   4   1    1.63    0.31
  16   4   1    2.02    0.21
  16   4   1    1.81    0.37
  18  -4   1    1.38    0.15
  18  -4   1    0.99    0.25
  18  -4   1    0.48    0.30
 -18  -4  -1    1.19    0.29
  18  -4   1    0.96    0.63
  18   4   1    2.08    0.32
  18   4   1    1.49    0.23
  18   4   1    1.34    0.18
  18   4   1    1.60    0.28
  18   4   1    0.80    0.32
 -18   4  -1    1.50    0.31
  20  -4   1    0.06    0.27
  20  -4   1    0.08    0.27
 -20  -4  -1   -0.01    0.29
  20  -4   1    0.08    0.09
  20  -4   1    0.61    0.26
 -20   4  -1    0.15    0.31
  20   4   1   -0.11    0.26
  20   4   1   -0.01    0.12
  20   4   1    0.51    0.31
  20   4   1    0.11    0.27
  20   4   1   -0.44    0.38
  20   4   1    0.44    0.35
  21  -5  -1    0.00    0.35
 -21  -5   1    0.11    0.31
  21  -5  -1   -0.06    0.37
  21  -5  -1    0.47    0.26
  21  -5  -1    0.30    0.24
  21   5  -1    0.08    0.59
  21   5  -1    0.02    0.15
  21   5  -1    0.08    0.25
  21   5  -1    0.25    0.25
  19  -5  -1    1.66    0.24
  19  -5  -1    2.37    0.32
  19  -5  -1    0.92    0.65
 -19  -5   1    1.37    0.35
  19  -5  -1    1.16    0.25
  19  -5  -1    1.99    0.17
  19   5  -1    2.20    0.21
  19   5  -1    2.07    0.27
 -19   5   1    1.46    0.37
  19   5  -1    2.04    0.34
  19   5  -1    1.53    0.30
  17  -5  -1    1.66    0.43
  17  -5  -1    2.11    0.35
  17  -5  -1    2.95    0.41
  17  -5  -1    2.45    0.22
  17  -5  -1    1.84    0.53
  17  -5  -1    2.58    0.35
  17  -5  -1    2.81    0.34
 -17  -5   1    2.45    0.39
  17  -5  -1    3.50    0.52
  17  -5  -1    2.36    0.69
 -17   5   1    2.11    0.82
  17   5  -1    1.91    0.34
  17   5  -1    2.27    0.29
  17   5  -1    2.93    0.41
  17   5  -1    3.13    0.24
 -17   5   1    2.30    0.41
  17   5  -1    2.65    0.46
  17   5  -1    3.25    0.39
  17   5  -1    2.60    0.35
  15  -5  -1    0.75    0.30
  15  -5  -1    0.35    0.27
  15  -5  -1    0.18    0.18
 -15  -5   1    0.61    0.40
  15  -5  -1    0.61    0.20
  15  -5  -1    0.71    0.40
  15  -5  -1    0.26    0.58
  15  -5  -1    0.69    0.22
 -15  -5   1    0.36    0.25
  15  -5  -1    0.48    0.20
  15   5  -1    0.22    0.22
 -15   5   1    0.19    0.24
  15   5  -1    0.21    0.09
  15   5  -1    0.72    0.24
  15   5  -1    0.37    0.17
 -15   5   1    1.10    0.54
  15   5  -1    0.35    0.25
  15   5  -1    0.23    0.21
 -15   5   1   -0.49    0.49
  15   5  -1   -0.29    0.48
 -15   5   1    1.10    0.63
  13  -5  -1    1.93    0.23
 -13  -5   1    1.10    0.48
  13  -5  -1    1.55    0.21
 -13  -5   1    1.70    0.28
 -13  -5   1    0.53    0.61
 -13  -5   1    1.13    0.48
  13  -5  -1    0.90    0.32
 -13  -5   1    0.89    0.31
  13  -5  -1    1.42    0.46
  13  -5  -1    1.92    0.25
 -13  -5   1    0.98    0.45
  13  -5  -1    1.25    0.29
  13  -5  -1    1.37    0.28
  13  -5  -1    1.35    0.38
  13  -5  -1    1.95    0.45
  13  -5  -1    1.89    0.40
  13  -5  -1    1.46    0.16
  13   5  -1    1.61    0.19
  13   5  -1    1.47    0.50
 -13   5   1    1.37    0.32
  13   5  -1    1.48    0.24
 -13   5   1    1.49    0.74
  13   5  -1    1.76    0.37
  13   5  -1    1.73    0.29
  13   5  -1    1.42    0.16
  13   5  -1    1.54    0.23
  13   5  -1    1.78    0.28
 -13   5   1    1.41    0.52
 -13   5   1    1.06    0.30
  13   5  -1    1.78    0.26
  11  -5  -1   16.29    1.07
 -11  -5   1   14.44    1.23
  11  -5  -1   16.59    1.10
  11  -5  -1   15.72    1.19
  11  -5  -1   15.88    1.01
 -11  -5   1   16.70    1.22
  11  -5  -1   15.78    1.05
 -11  -5   1   16.12    1.32
  11  -5  -1   17.02    1.23
  11  -5  -1   14.37    3.60
  11  -5  -1   14.38    1.05
  11  -5  -1   15.99    1.29
  11  -5  -1   14.11    1.04
  11  -5  -1   15.77    1.03
  11  -5  -1   16.09    1.12
 -11   5   1   14.57    1.04
  11   5  -1   13.25    1.14
 -11   5   1   13.79    1.23
 -11   5   1   12.46    0.91
  11   5  -1   15.08    0.99
 -11   5   1   13.84    1.11
  11   5  -1   15.17    0.97
 -11   5   1   14.24    1.08
  11   5  -1   11.93    2.27
 -11   5   1   15.88    1.31
  11   5  -1   14.09    0.91
  11   5  -1   15.13    1.05
 -11   5   1   12.80    1.04
  11   5  -1   15.08    0.93
  11   5  -1   14.83    2.12
  -9  -5   1    4.82    1.51
   9  -5  -1    7.91    0.55
   9  -5  -1    7.00    0.46
   9  -5  -1    3.68    2.44
   9  -5  -1    5.76    0.61
   9  -5  -1    5.56    0.47
   9  -5  -1    5.55    0.61
   9  -5  -1    5.76    2.08
   9   5  -1    6.07    0.58
  -9   5   1    7.50    0.47
  -9   5   1    6.76    0.50
   9   5  -1    5.78    1.43
  -9   5   1    7.23    0.65
  -9   5   1    8.55    0.81
  -9   5   1    3.26    1.94
  -9   5   1    7.60    0.59
   9   5  -1    5.63    1.22
   9   5  -1    7.71    0.48
   7  -5  -1   11.58    0.76
  -7  -5   1   11.74    1.54
   7  -5  -1   12.06    0.77
   7  -5  -1   11.61    0.87
  -7  -5   1   11.18    0.87
  -7  -5   1   11.91    1.55
   7  -5  -1   11.55    0.80
   7  -5  -1   11.51    0.95
  -7   5   1   10.77    0.76
  -7   5   1   11.63    0.97
  -7   5   1   11.25    0.82
   7   5  -1   11.86    0.80
  -7   5   1   13.33    0.85
   7   5  -1   10.92    0.82
   7   5  -1   10.54    0.77
   7   5  -1   12.73    1.32
  -7   5   1   14.00    2.15
   7   5  -1   12.76    1.44
  -5  -5   1   49.19    3.06
  -5  -5   1   40.99    3.41
  -5  -5   1   48.39    3.42
  -5  -5   1   51.34    3.02
   5  -5  -1   51.70    3.09
   5  -5  -1   51.07    3.03
   5  -5  -1   52.00    3.04
   5  -5  -1   43.95    3.05
  -5  -5   1   48.33    3.08
   5  -5  -1   47.92    3.08
   5  -5  -1   41.60    3.04
  -5   5   1   48.88    3.18
  -5   5   1   48.36    4.07
  -5   5   1   50.60    4.09
  -5   5   1   50.37    3.17
   5   5  -1   50.31    3.40
   5   5  -1   47.85    3.08
   5   5  -1   45.51    3.09
  -5   5   1   47.14    3.13
   5   5  -1   47.92    3.39
   5   5  -1   50.66    3.11
  -5   5   1   53.02    3.14
   3  -5  -1   26.62    1.84
  -3  -5   1   28.22    1.86
   3  -5  -1   27.66    1.84
   3  -5  -1   27.84    1.85
   3  -5  -1   30.23    1.88
   3  -5  -1   31.40    1.87
   3  -5  -1   32.54    2.55
  -3   5   1   28.02    1.87
  -3   5   1   32.28    1.91
  -3   5   1   29.70    2.57
  -3   5   1   29.49    1.90
  -3   5   1   25.93    1.86
  -3   5   1   28.64    1.88
  -3   5   1   32.33    2.61
   1  -5  -1   47.04    3.06
  -1  -5   1   53.89    3.39
  -1  -5   1   51.54    3.07
   1  -5  -1   45.50    3.51
   1  -5  -1   45.72    3.05
   1  -5  -1   48.79    3.46
   1  -5  -1   44.92    3.58
   1  -5  -1   46.15    3.05
  -1  -5   1   52.00    3.45
   1  -5  -1   49.86    3.04
   1  -5  -1   45.13    3.06
   1  -5  -1   50.88    3.39
   1   5  -1   50.87    2.88
  -1   5   1   44.71    3.38
  -1   5   1   47.10    3.31
  -1   5   1   40.76    2.88
   1   5  -1   50.88    2.90
   1   5  -1   43.11    2.86
  -1   5   1   43.01    2.89
  -1  -5  -1   44.03    2.59
   1  -5   1   42.16    2.58
  -1  -5  -1   42.68    2.81
   1  -5   1   45.54    3.20
   1  -5   1   44.89    2.58
   1  -5   1   35.88    2.62
   1  -5   1   39.73    2.57
  -1  -5  -1   36.36    2.58
  -1  -5  -1   39.26    2.59
  -1  -5  -1   39.45    2.57
  -1  -5  -1   39.50    2.83
  -1   5  -1   44.60    2.73
   1   5   1   43.10    2.68
   1   5   1   40.33    2.67
  -1   5  -1   40.22    2.70
  -1   5  -1   43.24    2.71
  -1   5  -1   47.36    3.23
  -1   5  -1   38.38    3.35
  -3  -5  -1    4.74    0.42
  -3  -5  -1    5.07    0.34
   3  -5   1    4.48    0.34
   3  -5   1    3.47    0.95
  -3  -5  -1    4.31    0.62
   3  -5   1    5.12    0.34
   3  -5   1    4.00    0.45
   3  -5   1    3.33    0.92
  -3  -5  -1    4.12    0.37
   3  -5   1    4.85    0.40
   3  -5   1    5.02    0.44
  -3  -5  -1    5.39    0.43
  -3  -5  -1    3.90    0.57
   3   5   1    3.22    0.67
   3   5   1    4.66    0.70
  -3   5  -1    4.51    0.47
  -3   5  -1    4.59    0.39
  -3   5  -1    3.85    1.14
  -3   5  -1    4.78    0.42
  -3   5  -1    4.45    0.36
  -3   5  -1    3.95    0.96
  -3   5  -1    5.04    0.41
   5  -5   1   11.60    0.75
  -5  -5  -1   11.08    0.83
   5  -5   1   11.10    0.82
   5  -5   1   11.64    0.86
   5  -5   1   11.56    0.74
  -5  -5  -1   10.00    0.84
   5  -5   1   10.95    0.76
   5  -5   1   11.78    0.78
  -5  -5  -1   10.75    0.74
   5  -5   1   14.05    2.05
   5  -5   1   11.53    0.74
   5  -5   1   12.68    0.97
  -5  -5  -1   11.12    0.85
   5  -5   1   11.51    0.82
   5  -5   1   11.14    0.78
   5   5   1   10.90    0.72
  -5   5  -1    5.98    2.47
  -5   5  -1   10.75    0.79
  -5   5  -1   11.26    0.77
  -5   5  -1   10.51    0.74
  -5   5  -1    9.58    0.84
   5   5   1    9.16    0.70
  -5   5  -1   10.15    0.78
   5   5   1    8.31    1.30
  -5   5  -1   12.96    2.05
   5   5   1   11.44    0.69
   5   5   1   11.06    0.68
   5   5   1   10.95    0.74
  -5   5  -1    9.88    0.69
  -7  -5  -1    6.28    1.29
   7  -5   1    6.65    0.52
   7  -5   1    6.11    0.50
  -7  -5  -1    7.24    0.46
   7  -5   1    6.81    0.74
   7  -5   1    6.89    0.53
   7  -5   1    8.13    2.30
  -7  -5  -1    6.31    0.66
  -7  -5  -1    5.45    0.74
   7  -5   1    6.36    0.65
   7  -5   1    7.03    0.60
   7  -5   1    6.42    0.59
  -7  -5  -1    7.14    0.66
   7   5   1    5.69    0.63
  -7   5  -1    6.66    0.58
  -7   5  -1    6.38    0.70
   7   5   1    6.63    1.30
   7   5   1    6.55    0.56
  -7   5  -1    6.25    0.53
  -7   5  -1    7.00    0.61
   7   5   1    4.29    1.29
  -7   5  -1    6.26    0.53
  -7   5  -1    5.00    1.79
   7   5   1    5.76    0.43
   7   5   1    5.78    0.41
   9  -5   1   14.70    0.90
   9  -5   1   16.65    1.30
   9  -5   1   13.43    1.06
   9  -5   1   14.19    0.94
   9  -5   1   15.56    3.26
  -9  -5  -1   14.01    1.21
  -9  -5  -1   13.00    1.13
   9  -5   1   13.98    3.22
   9  -5   1   14.27    0.97
   9  -5   1   14.64    0.97
   9  -5   1   12.76    1.12
   9  -5   1   13.44    0.92
  -9   5  -1   13.84    2.52
   9   5   1   11.30    0.98
  -9   5  -1   10.58    1.08
  -9   5  -1   12.59    0.81
  -9   5  -1   11.64    0.95
  -9   5  -1   13.61    2.84
  -9   5  -1   13.08    1.01
   9   5   1   13.64    0.84
  -9   5  -1   13.30    0.94
  -9   5  -1   11.85    0.91
  -9   5  -1   12.54    0.79
   9   5   1   10.40    2.43
  -9   5  -1    8.13    2.71
   9   5   1   11.80    0.79
  11  -5   1    0.76    0.31
  11  -5   1    0.56    0.19
  11  -5   1    0.55    0.09
 -11  -5  -1    0.57    0.27
 -11  -5  -1    0.50    0.58
  11  -5   1    0.18    0.46
 -11  -5  -1    0.73    1.29
  11  -5   1    0.65    0.16
 -11  -5  -1    0.79    0.16
 -11  -5  -1    0.33    0.38
 -11  -5  -1   -0.43    1.46
  11  -5   1    0.30    0.32
 -11   5  -1    0.64    0.36
 -11   5  -1   -0.12    0.22
  11   5   1    0.47    0.99
  11   5   1    0.46    0.32
 -11   5  -1   -0.76    1.78
 -11   5  -1    0.53    0.46
  11   5   1    0.46    0.07
  11   5   1   -1.05    1.50
  13  -5   1    6.95    0.66
  13  -5   1    6.26    0.88
  13  -5   1    6.96    0.63
  13  -5   1    7.53    0.50
  13  -5   1    7.98    0.59
 -13  -5  -1    6.99    0.57
  13  -5   1    6.85    0.58
 -13  -5  -1    9.03    0.87
  13  -5   1    6.80    0.63
  13  -5   1    8.11    0.59
  13  -5   1    6.77    0.78
  13  -5   1    7.24    0.55
 -13   5  -1    6.94    0.95
  13   5   1    6.43    1.13
  13   5   1    7.64    0.51
  13   5   1    7.70    0.61
  13   5   1    8.00    0.65
 -13   5  -1    7.75    1.11
  13   5   1    8.09    0.56
  13   5   1    7.33    0.60
  15  -5   1    0.75    0.50
  15  -5   1    0.92    0.31
  15  -5   1    1.67    0.28
  15  -5   1    1.32    0.22
  15  -5   1    0.97    0.43
  15  -5   1    1.81    0.33
  15  -5   1    0.96    0.29
  15  -5   1    1.07    0.24
 -15  -5  -1    1.35    0.31
 -15  -5  -1    1.45    0.49
 -15  -5  -1    1.29    0.23
  15  -5   1    0.98    0.13
  15  -5   1    1.33    0.24
  15   5   1    1.14    0.25
  15   5   1    1.49    0.27
  15   5   1    1.44    0.15
  15   5   1    1.15    0.25
  15   5   1    1.18    0.23
  15   5   1    1.44    0.21
 -15   5  -1    1.13    0.57
 -17  -5  -1   -0.01    0.25
  17  -5   1   -0.55    0.29
  17  -5   1    0.22    0.20
  17  -5   1    0.08    0.50
  17  -5   1   -0.02    0.18
  17  -5   1    0.03    0.08
  17  -5   1    0.04    0.20
  17  -5   1    0.17    0.17
  17  -5   1   -0.18    0.22
  17   5   1    0.01    0.23
 -17   5  -1   -0.26    0.70
  17   5   1    0.12    0.20
  17   5   1   -0.01    0.28
  17   5   1    0.16    0.23
  17   5   1   -0.01    0.09
  17   5   1    0.08    0.17
  19  -5   1    1.88    0.29
  19  -5   1    1.46    0.17
  19  -5   1    1.44    0.31
  19  -5   1    1.66    0.27
  19   5   1    1.56    0.33
  19   5   1    1.24    0.15
  19   5   1    1.10    0.23
  19   5   1    1.59    0.37
  19   5   1    0.66    0.27
  19   5   1    0.88    0.27
 -19   5  -1    0.61    0.32
  20  -6  -1    0.82    0.27
  20  -6  -1    0.54    0.28
  20  -6  -1    0.47    0.26
 -20  -6   1    0.23    0.42
  20  -6  -1    0.34    0.09
  20  -6  -1    0.65    0.25
  20   6  -1    0.39    0.28
  20   6  -1    0.89    0.39
  20   6  -1    0.05    0.22
  20   6  -1    0.32    0.12
  20   6  -1    0.45    0.28
  18  -6  -1    0.68    0.21
 -18  -6   1    0.53    0.29
  18  -6  -1    0.23    0.23
  18  -6  -1    0.56    0.38
  18  -6  -1    0.33    0.19
  18  -6  -1    0.50    0.11
  18  -6  -1    0.67    0.21
  18  -6  -1    0.62    0.22
  18  -6  -1    0.29    0.55
  18   6  -1    0.27    0.19
  18   6  -1    0.71    0.26
  18   6  -1    0.17    0.26
  18   6  -1    0.63    0.26
  18   6  -1    0.52    0.20
 -18   6   1    0.09    0.87
 -18   6   1    0.39    0.26
  18   6  -1    0.44    0.12
  16  -6  -1    2.57    0.36
  16  -6  -1    3.20    0.36
  16  -6  -1    2.40    0.54
  16  -6  -1    3.52    0.56
  16  -6  -1    2.35    0.44
  16  -6  -1    2.31    0.61
  16  -6  -1    2.50    0.24
  16  -6  -1    3.57    0.41
  16  -6  -1    3.35    0.41
 -16  -6   1    2.85    0.45
  16   6  -1    3.23    0.35
  16   6  -1    3.31    0.46
 -16   6   1    4.47    1.29
  16   6  -1    3.39    0.40
  16   6  -1    3.15    0.27
  16   6  -1    2.72    0.40
  14  -6  -1    3.31    0.59
  14  -6  -1    2.52    0.32
  14  -6  -1    2.62    0.40
  14  -6  -1    3.09    0.48
 -14  -6   1    2.04    0.56
  14  -6  -1    2.62    0.58
 -14  -6   1    3.17    0.49
 -14  -6   1    3.02    0.33
  14  -6  -1    3.13    0.41
  14  -6  -1    2.61    0.49
  14  -6  -1    2.84    0.30
 -14  -6   1    4.03    0.64
  14  -6  -1    3.11    0.25
  14  -6  -1    3.33    0.43
 -14  -6   1    3.20    0.76
 -14   6   1    2.14    0.44
  14   6  -1    3.11    0.37
  14   6  -1    2.62    0.36
  14   6  -1    3.10    0.31
  14   6  -1    3.42    0.25
  14   6  -1    3.64    0.40
 -14   6   1    3.92    0.86
  14   6  -1    3.38    0.43
 -14   6   1    1.94    0.73
 -14   6   1    3.16    0.68
  12  -6  -1    6.67    0.56
  12  -6  -1    5.40    0.67
 -12  -6   1    7.06    0.58
 -12  -6   1    6.00    0.80
  12  -6  -1    6.21    0.49
  12  -6  -1    6.31    0.72
  12  -6  -1    6.30    0.43
 -12  -6   1    4.95    0.75
 -12  -6   1    5.99    0.77
 -12  -6   1    7.50    0.71
  12  -6  -1    6.51    0.54
  12  -6  -1    5.84    0.50
  12  -6  -1    5.73    0.75
  12  -6  -1    6.38    0.47
  12  -6  -1    6.27    0.51
  12  -6  -1    6.37    0.59
 -12   6   1    5.35    0.60
 -12   6   1    7.63    0.94
 -12   6   1    5.50    0.55
  12   6  -1    6.18    0.48
 -12   6   1    5.43    0.57
  12   6  -1    4.35    0.81
 -12   6   1    5.42    0.82
 -12   6   1    6.08    0.72
  12   6  -1    6.38    0.42
  12   6  -1    5.99    0.39
  12   6  -1    4.84    0.79
  10  -6  -1    0.22    1.79
  10  -6  -1    0.98    0.32
  10  -6  -1    1.86    0.29
  10  -6  -1    1.23    0.37
  10  -6  -1    1.95    0.98
  10  -6  -1    1.46    0.17
 -10  -6   1    1.16    0.32
  10  -6  -1    1.34    0.14
  10  -6  -1    1.57    0.24
 -10  -6   1    0.88    0.94
 -10  -6   1    1.39    0.30
 -10  -6   1    1.32    0.36
  10  -6  -1    1.84    0.25
 -10  -6   1    1.29    0.36
  10  -6  -1    1.74    0.38
 -10  -6   1    0.83    1.02
  10  -6  -1    1.38    0.20
  10   6  -1    1.17    0.83
 -10   6   1    1.70    0.47
 -10   6   1    1.28    0.18
 -10   6   1    0.87    0.28
 -10   6   1    1.28    0.28
 -10   6   1    1.24    0.14
  10   6  -1    1.64    0.21
  10   6  -1    1.02    0.31
 -10   6   1    0.94    0.29
  10   6  -1    1.30    0.16
  10   6  -1    1.09    0.97
  10   6  -1    1.38    0.26
 -10   6   1    0.77    0.37
  10   6  -1    1.66    0.20
 -10   6   1    0.96    0.30
   8  -6  -1   21.24    2.73
  -8  -6   1   17.25    1.37
   8  -6  -1   20.96    1.39
  -8  -6   1   18.31    1.41
   8  -6  -1   19.47    1.34
   8  -6  -1   18.38    1.26
   8  -6  -1   21.01    1.31
  -8  -6   1   21.78    1.51
   8  -6  -1   17.60    1.31
   8  -6  -1   20.72    1.41
   8  -6  -1   21.37    1.47
   8  -6  -1   20.37    1.29
   8  -6  -1   22.01    1.30
   8   6  -1   17.23    1.88
  -8   6   1   17.74    2.69
  -8   6   1   19.48    1.25
   8   6  -1   17.85    1.18
  -8   6   1   16.15    1.11
   8   6  -1   17.98    1.22
  -8   6   1   17.49    1.20
  -8   6   1   20.52    2.74
   8   6  -1   16.07    1.15
   8   6  -1   17.98    1.75
   8   6  -1   15.92    1.13
  -8   6   1   19.90    1.34
  -6  -6   1   13.06    1.41
   6  -6  -1   14.58    1.05
  -6  -6   1   15.28    0.96
   6  -6  -1   13.90    0.96
   6  -6  -1   14.34    1.01
   6  -6  -1   15.16    1.05
   6  -6  -1   15.24    0.97
  -6  -6   1   15.58    1.06
   6  -6  -1   16.50    1.11
  -6  -6   1   15.11    1.01
   6  -6  -1   14.33    0.98
  -6  -6   1   15.36    1.01
   6  -6  -1   14.92    1.99
  -6   6   1   14.15    0.99
   6   6  -1   13.74    0.92
   6   6  -1   14.32    1.30
  -6   6   1   14.81    2.05
  -6   6   1   14.68    1.02
   6   6  -1   14.64    0.94
   6   6  -1   13.23    0.91
  -6   6   1   12.83    0.92
   6   6  -1   15.93    1.36
  -6   6   1   14.56    2.10
  -6   6   1   15.38    1.05
   4  -6  -1   39.70    2.32
  -4  -6   1   36.50    2.31
   4  -6  -1   31.94    2.27
   4  -6  -1   40.14    3.15
   4  -6  -1   34.83    2.29
   4  -6  -1   35.29    2.28
   4  -6  -1   37.30    2.32
  -4  -6   1   33.55    2.27
   4  -6  -1   35.81    2.28
  -4   6   1   30.92    2.20
   4   6  -1   32.99    2.22
  -4   6   1   34.04    2.25
  -4   6   1   37.82    3.16
  -4   6   1   38.17    3.15
  -4   6   1   35.71    2.25
  -4   6   1   35.83    2.28
  -4   6   1   37.83    2.29
   2  -6  -1   17.18    1.40
   2  -6  -1   19.71    1.18
   2  -6  -1   17.47    1.75
   2  -6  -1   18.42    1.18
  -2  -6   1   20.63    1.34
   2  -6  -1   15.65    1.79
   2  -6  -1   20.37    1.66
   2  -6  -1   16.45    1.19
   2  -6  -1   19.17    1.18
   2  -6  -1   16.96    1.18
  -2   6   1   16.51    1.12
  -2   6   1   18.79    1.79
  -2   6   1   16.03    1.10
  -2   6   1   18.15    1.76
  -2   6   1   16.77    1.12
   0  -6  -1    7.54    0.54
   0  -6   1    8.69    0.60
   0  -6   1    7.59    1.06
   0  -6   1    8.09    0.53
   0  -6  -1    7.59    0.96
   0  -6   1    7.18    1.13
   0  -6  -1    7.16    0.53
   0   6  -1    6.32    0.89
   0   6  -1    6.43    0.43
   0   6  -1    6.68    0.46
   0   6  -1    7.19    0.44
   0   6  -1    6.27    1.15
   0   6   1    4.67    0.89
   0   6   1    5.30    0.83
   2  -6   1   11.05    0.76
   2  -6   1   11.72    0.84
   2  -6   1   10.86    1.50
  -2  -6  -1   10.71    0.75
   2  -6   1   11.12    0.77
   2  -6   1   10.30    0.73
  -2  -6  -1   11.76    0.79
  -2  -6  -1   12.65    0.79
   2  -6   1   12.49    1.56
   2  -6   1   11.24    0.77
  -2   6  -1   10.70    0.72
  -2   6  -1   10.60    0.88
  -2   6  -1   10.09    0.73
  -2   6  -1    9.90    1.58
  -2   6  -1   10.42    0.74
  -2   6  -1   10.66    0.79
  -2   6  -1   12.44    1.41
   4  -6   1   44.38    2.81
   4  -6   1   40.17    3.72
  -4  -6  -1   43.92    2.86
   4  -6   1   42.96    2.92
  -4  -6  -1   46.14    2.79
   4  -6   1   43.19    2.83
   4  -6   1   42.26    2.81
   4  -6   1   45.68    2.87
  -4  -6  -1   46.49    3.06
   4  -6   1   41.14    2.82
  -4  -6  -1   46.22    2.86
   4  -6   1   46.81    3.90
  -4   6  -1   40.69    2.64
  -4   6  -1   42.59    3.99
  -4   6  -1   40.02    2.58
  -4   6  -1   40.13    2.60
  -4   6  -1   39.77    2.56
  -4   6  -1   37.53    2.52
  -4   6  -1   44.40    3.55
  -4   6  -1   35.21    3.64
  -4   6  -1   40.83    2.58
   6  -6   1   22.19    1.61
   6  -6   1   27.62    1.74
  -6  -6  -1   21.90    1.67
   6  -6   1   27.21    1.67
   6  -6   1   24.27    1.58
   6  -6   1   27.21    1.60
  -6  -6  -1   24.75    1.71
   6  -6   1   22.51    1.78
  -6  -6  -1   25.30    2.15
  -6  -6  -1   25.24    1.60
   6  -6   1   22.62    2.82
   6  -6   1   26.32    1.63
  -6  -6  -1   25.09    1.71
  -6   6  -1   25.17    1.57
  -6   6  -1   23.21    1.49
  -6   6  -1   22.37    1.55
  -6   6  -1   25.25    1.61
  -6   6  -1   22.50    1.59
  -6   6  -1   24.49    1.68
   6   6   1   24.32    1.55
  -6   6  -1   26.86    4.29
   6   6   1   20.27    1.51
  -6   6  -1   20.31    2.90
   8  -6   1    3.61    1.67
   8  -6   1    3.68    0.54
  -8  -6  -1    4.16    0.56
   8  -6   1    4.00    0.36
  -8  -6  -1    5.69    1.30
   8  -6   1    3.61    1.60
   8  -6   1    3.92    0.28
   8  -6   1    3.90    0.34
   8  -6   1    4.00    0.39
  -8  -6  -1    3.93    0.57
   8  -6   1    3.78    0.31
   8  -6   1    4.80    0.64
   8  -6   1    3.58    0.47
   8   6   1    3.41    0.46
  -8   6  -1    3.24    0.34
  -8   6  -1    3.86    0.46
  -8   6  -1    5.57    1.89
  -8   6  -1    3.94    0.26
   8   6   1    3.53    0.27
  -8   6  -1    3.28    0.56
  -8   6  -1    3.11    1.71
  -8   6  -1    3.31    1.63
  -8   6  -1    4.14    0.51
  -8   6  -1    3.12    0.41
  -8   6  -1    3.17    0.46
   8   6   1    2.26    1.13
   8   6   1    4.30    0.31
  10  -6   1    6.30    0.74
 -10  -6  -1    6.20    1.75
  10  -6   1    6.72    0.55
 -10  -6  -1    7.76    0.67
 -10  -6  -1    5.56    0.74
  10  -6   1    6.89    0.51
  10  -6   1    7.04    0.51
  10  -6   1    5.48    0.87
  10  -6   1    6.81    0.67
  10  -6   1    6.60    0.51
  10  -6   1    7.67    0.56
  10  -6   1    6.38    0.45
  10  -6   1    6.96    0.49
 -10   6  -1    5.89    0.61
 -10   6  -1    5.80    0.40
 -10   6  -1    6.52    0.71
 -10   6  -1    4.05    2.07
  10   6   1    5.93    0.69
 -10   6  -1    5.86    0.62
  10   6   1    6.96    1.50
 -10   6  -1    6.47    0.58
  10   6   1    6.42    0.47
  10   6   1    5.39    0.40
 -10   6  -1    6.84    0.45
  10   6   1    6.30    0.42
  10   6   1    3.68    1.55
 -10   6  -1    5.48    0.80
  12  -6   1   11.79    0.85
  12  -6   1   11.24    1.09
  12  -6   1   11.60    0.81
  12  -6   1   11.83    0.87
 -12  -6  -1   10.45    0.80
  12  -6   1   10.43    0.97
 -12  -6  -1   10.52    1.03
  12  -6   1   11.70    0.82
  12  -6   1   12.84    0.75
 -12  -6  -1   12.92    1.25
  12  -6   1   11.60    0.81
 -12   6  -1    9.09    0.85
  12   6   1    9.70    1.04
 -12   6  -1    8.20    1.13
 -12   6  -1    9.45    0.82
 -12   6  -1    9.06    0.99
  12   6   1   10.73    0.68
  12   6   1   11.45    0.73
  14  -6   1    1.76    0.36
  14  -6   1    1.72    0.28
 -14  -6  -1    1.81    0.34
  14  -6   1    1.82    0.26
  14  -6   1    1.66    0.36
 -14  -6  -1    1.43    0.40
  14  -6   1    2.67    0.39
  14  -6   1    1.73    0.25
 -14  -6  -1    1.81    0.25
  14  -6   1    1.85    0.24
  14  -6   1    1.53    0.18
  14  -6   1    1.56    0.46
 -14  -6  -1    0.25    0.66
  14   6   1    1.56    0.18
  14   6   1    1.78    0.22
 -14   6  -1    1.81    0.79
 -14   6  -1    1.15    0.69
  14   6   1    2.05    0.34
 -14   6  -1    1.47    0.70
 -14   6  -1    1.20    0.33
  14   6   1    1.32    0.35
  16  -6   1    0.50    0.31
  16  -6   1    0.37    0.18
  16  -6   1    0.33    0.26
  16  -6   1   -0.18    0.34
  16  -6   1    0.37    0.10
  16  -6   1    0.68    0.43
  16  -6   1    0.47    0.24
  16  -6   1    0.58    0.21
 -16  -6  -1    0.36    0.27
  16  -6   1    0.15    0.18
  16  -6   1    0.08    0.46
 -16  -6  -1    0.68    0.26
  16   6   1    0.12    0.22
  16   6   1    0.56    0.11
 -16   6  -1   -0.04    0.69
  16   6   1    0.29    0.17
  16   6   1    0.37    0.24
  16   6   1    0.37    0.22
  16   6   1    0.28    0.22
  18  -6   1    0.54    0.22
  18  -6   1   -0.48    0.66
  18  -6   1    0.63    0.22
  18  -6   1    0.44    0.64
  18  -6   1    0.31    0.19
  18  -6   1    0.31    0.19
  18  -6   1    0.11    0.08
  18  -6   1    0.12    0.20
 -18  -6  -1    0.10    0.25
  18   6   1    0.24    0.29
  18   6   1    0.12    0.11
  18   6   1   -0.06    0.28
  18   6   1    0.18    0.21
 -18   6  -1    0.22    0.27
  18   6   1    0.25    0.26
  18   6   1    0.02    0.18
  20  -6   1    0.00    0.26
  20  -6   1    0.24    0.26
  20  -6   1    0.33    0.33
  20  -6   1   -0.24    0.28
 -20  -6  -1    0.00    0.22
  20   6   1   -0.09    0.13
  20   6   1    0.21    0.36
 -20   6  -1    0.14    0.31
  20   6   1    0.88    0.52
  20   6   1    0.25    0.25
  20   6   1   -0.12    0.24
  20   6   1    0.30    0.31
  21   7  -1    0.48    0.37
  21   7  -1   -0.13    0.22
  21   7  -1    0.06    0.11
  19  -7  -1    1.61    0.17
  19  -7  -1    1.13    0.57
  19  -7  -1    1.82    0.49
  19  -7  -1    0.97    0.30
  19  -7  -1    1.01    0.37
  19   7  -1    1.00    0.33
  19   7  -1    1.05    0.30
  19   7  -1    1.57    0.33
  19   7  -1    2.26    0.39
  19   7  -1    1.72    0.21
 -17  -7   1    0.56    0.37
  17  -7  -1    1.31    0.34
  17  -7  -1    0.83    0.27
  17  -7  -1    0.61    0.54
  17  -7  -1    1.16    0.12
  17  -7  -1    0.50    0.27
  17  -7  -1    1.76    0.37
  17  -7  -1    0.93    0.21
  17  -7  -1    0.50    0.49
  17  -7  -1    1.28    0.35
 -17   7   1    1.56    0.86
  17   7  -1    0.98    0.21
  17   7  -1    0.76    0.27
  17   7  -1    0.42    0.34
  17   7  -1    1.18    0.15
 -17   7   1    1.09    0.28
  17   7  -1    1.26    0.29
  17   7  -1    0.72    0.20
 -15  -7   1    4.39    0.54
  15  -7  -1    4.04    0.69
  15  -7  -1    4.98    0.45
  15  -7  -1    3.97    0.58
  15  -7  -1    4.75    0.49
  15  -7  -1    5.20    0.60
 -15  -7   1    5.22    0.43
  15  -7  -1    5.17    0.52
  15  -7  -1    5.24    0.48
  15  -7  -1    5.45    0.49
  15   7  -1    4.69    0.39
 -15   7   1    3.77    1.00
  15   7  -1    4.14    0.36
  15   7  -1    5.21    0.50
 -15   7   1    5.20    0.97
  15   7  -1    4.37    0.46
  15   7  -1    4.32    0.44
 -15   7   1    3.36    0.51
  15   7  -1    3.70    0.38
 -15   7   1    3.87    0.87
  13  -7  -1    5.48    0.82
 -13  -7   1    8.10    0.72
 -13  -7   1    5.35    0.82
  13  -7  -1    7.28    0.55
 -13  -7   1    7.36    0.54
  13  -7  -1    6.00    0.73
 -13  -7   1    6.60    0.80
 -13  -7   1    8.31    0.75
  13  -7  -1    7.79    0.63
  13  -7  -1    5.58    0.61
 -13  -7   1    7.21    0.88
  13  -7  -1    8.06    0.64
  13  -7  -1    6.92    0.59
  13  -7  -1    6.99    0.65
 -13  -7   1    6.66    0.63
  13  -7  -1    7.57    0.56
  13  -7  -1    6.61    0.57
  13   7  -1    6.88    0.45
 -13   7   1    5.43    0.92
  13   7  -1    5.69    0.40
 -13   7   1    4.27    0.83
  13   7  -1    6.66    0.51
 -13   7   1    5.87    0.60
 -13   7   1    5.02    0.63
 -13   7   1    5.70    0.79
 -11  -7   1   32.24    2.35
  11  -7  -1   35.73    2.22
  11  -7  -1   36.64    2.25
  11  -7  -1   34.36    2.38
  11  -7  -1   32.43    2.42
 -11  -7   1   30.13    2.37
  11  -7  -1   34.95    2.34
  11  -7  -1   38.04    2.20
  11  -7  -1   32.99    2.26
  11  -7  -1   33.99    2.29
 -11  -7   1   32.54    2.34
 -11  -7   1   37.21    2.32
 -11  -7   1   38.32    2.56
  11  -7  -1   32.58    2.17
 -11   7   1   31.19    2.30
  11   7  -1   33.06    2.00
 -11   7   1   32.23    2.38
 -11   7   1   32.91    2.13
 -11   7   1   30.23    2.16
  11   7  -1   30.44    2.10
 -11   7   1   30.55    2.12
  11   7  -1   29.83    2.04
 -11   7   1   33.48    2.20
   9  -7  -1    9.58    2.43
   9  -7  -1    5.90    0.42
   9  -7  -1    6.27    0.66
  -9  -7   1    3.71    1.08
   9  -7  -1    6.64    0.61
   9  -7  -1    5.28    0.48
   9  -7  -1    4.92    0.45
   9  -7  -1    4.14    1.10
   9  -7  -1    6.33    0.43
  -9  -7   1    4.57    0.59
   9  -7  -1    6.75    2.18
  -9  -7   1    4.62    0.48
   9  -7  -1    4.76    0.36
   9  -7  -1    6.26    0.68
   9  -7  -1    5.73    0.40
   9  -7  -1    5.16    1.88
  -9  -7   1    4.71    0.59
   9  -7  -1    6.16    0.47
  -9   7   1    5.44    0.54
   9   7  -1    4.29    0.32
  -9   7   1    6.53    2.13
   9   7  -1    4.77    0.43
  -9   7   1    4.05    0.66
  -9   7   1    6.29    2.37
  -9   7   1    5.29    0.49
   9   7  -1    5.05    0.51
  -9   7   1    5.42    0.65
   9   7  -1    5.26    1.20
  -9   7   1    5.26    0.53
  -9   7   1    4.45    0.45
   9   7  -1    4.81    1.06
   9   7  -1    4.22    0.36
  -9   7   1    4.40    0.32
   9   7  -1    4.03    0.36
   7  -7  -1   42.21    2.65
  -7  -7   1   38.67    2.62
   7  -7  -1   42.25    2.63
   7  -7  -1   40.57    2.67
   7  -7  -1   43.50    4.06
   7  -7  -1   39.87    2.66
  -7  -7   1   42.65    2.74
   7  -7  -1   40.14    2.73
   7  -7  -1   45.48    2.78
   7  -7  -1   41.28    2.68
   7  -7  -1   42.34    2.71
  -7   7   1   36.35    2.41
   7   7  -1   37.29    2.44
  -7   7   1   36.76    2.45
  -7   7   1   42.06    4.00
  -7   7   1   40.29    2.51
  -7   7   1   36.92    3.94
  -7   7   1   40.03    2.52
   7   7  -1   36.00    2.43
  -7   7   1   40.47    2.55
  -7   7   1   40.55    2.59
   7   7  -1   37.46    2.45
   7   7  -1   36.97    2.42
  -7   7   1   39.44    2.50
   5  -7  -1  130.51    8.60
   5  -7  -1  118.57    7.23
  -5  -7   1  112.56    7.23
   5  -7  -1  112.56    7.29
   5  -7  -1  122.63    7.32
   5  -7  -1  112.02    7.24
   5  -7  -1  108.02    7.26
  -5  -7   1  121.64    7.29
  -5  -7   1  105.27    7.29
   5  -7  -1  118.47    7.28
   5  -7  -1  109.62    7.26
   5   7  -1  106.84    6.66
  -5   7   1   95.89    6.65
  -5   7   1  108.68    6.71
   5   7  -1  102.52    6.65
  -5   7   1  109.81    6.75
  -5   7   1  112.66    8.06
  -5   7   1  110.11    6.77
  -5   7   1  105.10    6.71
   3  -7  -1   18.14    1.20
   3  -7  -1   18.25    1.19
   3  -7  -1   17.45    1.87
   3  -7  -1   16.76    1.20
   3  -7  -1   18.73    1.18
  -3  -7   1   16.78    1.17
   3  -7  -1   19.10    1.17
   3  -7  -1   20.13    1.51
  -3  -7   1   17.60    1.20
  -3  -7   1   16.49    1.21
   3  -7  -1   19.76    2.08
   3  -7  -1   18.97    1.18
   3  -7  -1   18.60    1.76
  -3   7   1   17.56    1.89
  -3   7   1   17.88    1.93
  -3   7   1   18.41    1.17
  -3   7   1   16.57    1.15
  -3   7   1   17.52    1.11
  -3   7   1   16.25    1.08
  -3   7   1   16.12    1.13
   1  -7  -1   13.28    1.30
   1  -7  -1   12.51    0.75
  -1  -7   1   11.16    0.75
  -1  -7   1    9.76    1.18
  -1  -7   1   10.61    1.10
   1  -7  -1   10.62    1.35
   1  -7  -1   10.87    1.27
  -1  -7   1   10.72    0.74
  -1  -7   1   10.46    0.76
   1   7  -1    9.00    0.63
  -1   7   1    9.52    0.62
  -1   7   1    9.97    0.63
   1   7  -1    9.78    0.95
   1   7  -1    9.88    0.67
  -1   7   1    8.97    0.62
   1  -7   1   47.80    4.03
   1  -7   1   47.75    3.24
  -1  -7  -1   49.37    3.24
  -1  -7  -1   54.44    3.25
   1  -7   1   51.15    3.22
  -1  -7  -1   52.97    3.52
   1  -7   1   52.75    3.93
   1  -7   1   56.19    3.25
  -1  -7  -1   46.23    3.25
   1  -7   1   52.42    3.25
   1  -7   1   51.50    3.30
   1  -7   1   53.64    3.24
  -1  -7  -1   48.16    3.49
   1   7   1   45.33    3.11
  -1   7  -1   48.69    3.13
  -1   7  -1   53.41    3.15
  -1   7  -1   43.81    3.88
  -1   7  -1   53.38    3.17
   3  -7   1   96.20    6.53
   3  -7   1   86.25    5.49
  -3  -7  -1   88.49    5.46
   3  -7   1   88.09    5.46
   3  -7   1   79.17    5.56
   3  -7   1   84.56    6.37
   3  -7   1   76.67    5.45
   3  -7   1   93.89    5.50
  -3  -7  -1   80.78    5.50
   3  -7   1   91.39    5.48
  -3  -7  -1   90.36    5.50
  -3   7  -1   78.33    5.20
  -3   7  -1   80.35    6.48
  -3   7  -1   83.38    5.24
  -3   7  -1   84.68    5.27
  -3   7  -1   84.72    5.22
  -3   7  -1   81.64    5.17
  -3   7  -1   80.50    5.22
  -3   7  -1   75.56    6.26
  -3   7  -1   91.49    6.14
   5  -7   1   21.12    1.51
   5  -7   1   22.26    2.59
   5  -7   1   22.73    1.44
   5  -7   1   21.26    1.36
   5  -7   1   20.89    1.33
   5  -7   1   19.15    2.47
   5  -7   1   22.31    1.39
  -5  -7  -1   18.11    1.32
  -5  -7  -1   18.30    1.40
   5  -7   1   18.33    1.33
   5  -7   1   21.98    1.32
   5   7   1   17.39    1.22
  -5   7  -1   20.19    1.30
   5   7   1   16.12    1.16
   5   7   1   16.73    1.27
  -5   7  -1   18.33    3.10
  -5   7  -1   17.49    1.17
  -5   7  -1   18.87    1.23
  -5   7  -1   18.90    1.27
  -5   7  -1   21.94    2.41
  -5   7  -1   19.77    1.26
  -5   7  -1   19.61    1.35
  -5   7  -1   16.52    2.49
   7  -7   1    2.51    0.37
  -7  -7  -1    1.91    0.38
  -7  -7  -1    1.45    0.64
   7  -7   1    0.65    0.92
   7  -7   1    0.52    1.01
   7   7   1    1.19    0.24
   7   7   1    0.68    0.16
  -7   7  -1    1.10    1.02
  -7   7  -1   -1.09    1.29
  -7   7  -1    1.74    0.44
  -7   7  -1    0.69    1.14
   7   7   1    0.76    0.66
   7   7   1    0.91    0.41
   9  -7   1    2.56    0.32
   9  -7   1    2.50    0.53
   9  -7   1    2.82    0.52
   9  -7   1    2.96    0.29
  -9  -7  -1    2.64    0.52
   9  -7   1    3.18    0.26
   9  -7   1    2.98    0.45
   9  -7   1    2.83    0.32
  -9  -7  -1    2.18    0.48
   9  -7   1    3.24    0.36
  -9  -7  -1    2.62    1.01
   9  -7   1    2.66    0.36
  -9  -7  -1    3.50    0.39
   9  -7   1    2.48    0.21
  -9   7  -1    2.88    0.42
  -9   7  -1    2.37    1.76
  -9   7  -1    2.49    0.21
   9   7   1    2.44    0.26
  -9   7  -1    1.88    0.40
  -9   7  -1    1.63    0.47
   9   7   1    2.08    1.05
   9   7   1    3.36    0.86
  -9   7  -1    3.31    0.42
  -9   7  -1    3.10    0.46
   9   7   1    2.63    0.22
  -9   7  -1    3.25    0.28
   9   7   1    2.39    0.49
  11  -7   1    2.60    0.28
  11  -7   1    1.77    0.45
  11  -7   1    2.48    0.32
  11  -7   1    2.72    0.33
 -11  -7  -1    2.95    0.48
 -11  -7  -1    3.32    0.46
  11  -7   1    2.33    0.42
  11  -7   1    2.53    0.34
  11  -7   1    2.78    0.21
  11  -7   1    3.03    0.36
  11  -7   1    2.75    0.31
 -11  -7  -1    1.83    0.53
 -11   7  -1    2.04    0.75
 -11   7  -1    2.69    0.29
  11   7   1    2.70    0.29
 -11   7  -1    1.38    0.59
 -11   7  -1    2.14    0.37
 -11   7  -1    1.96    0.41
 -11   7  -1    2.41    0.20
  11   7   1    2.47    0.19
 -11   7  -1    2.40    0.36
  11   7   1    2.25    0.23
  13  -7   1   12.54    0.99
 -13  -7  -1   14.14    0.99
  13  -7   1   16.09    1.05
  13  -7   1   13.56    1.02
  13  -7   1   14.33    0.97
  13  -7   1   15.44    1.00
  13  -7   1   13.28    1.06
  13  -7   1   15.24    1.03
 -13  -7  -1   13.92    1.51
  13  -7   1   14.06    0.93
  13   7   1   13.95    1.00
  13   7   1   13.61    0.95
  13   7   1   13.64    0.91
 -13   7  -1   12.16    1.27
  13   7   1   13.48    0.88
  15  -7   1    2.38    0.61
  15  -7   1    2.94    0.34
 -15  -7  -1    3.55    0.48
  15  -7   1    3.16    0.46
  15  -7   1    2.39    0.45
  15  -7   1    2.56    0.35
  15  -7   1    2.84    0.25
  15  -7   1    3.38    0.56
  15  -7   1    3.70    0.40
 -15  -7  -1    3.36    0.37
  15  -7   1    3.57    0.38
  15  -7   1    2.04    0.49
  15   7   1    3.22    0.27
  15   7   1    3.54    0.43
  15   7   1    3.78    0.50
 -15   7  -1    4.30    1.51
  15   7   1    3.20    0.34
  15   7   1    3.16    0.38
  15   7   1    3.10    0.41
 -15   7  -1    1.34    0.81
  17  -7   1    2.77    0.27
  17  -7   1    1.69    0.59
 -17  -7  -1    2.61    0.42
  17  -7   1    3.69    0.57
 -17  -7  -1    3.28    0.39
  17  -7   1    3.25    0.37
  17   7   1    2.53    0.33
  17   7   1    2.69    0.36
 -17   7  -1    0.76    1.00
  17   7   1    2.02    0.33
  17   7   1    3.46    0.49
  17   7   1    2.88    0.24
  19  -7   1    0.31    0.27
  19  -7   1    0.31    0.26
  19  -7   1    0.02    0.54
 -19  -7  -1    0.39    0.32
  20  -8  -1   -0.14    0.25
  20  -8  -1   -0.47    1.03
 -20  -8   1    0.04    0.28
  20  -8  -1   -0.19    0.25
  20  -8  -1    0.40    0.30
  20   8  -1   -0.11    0.31
  20   8  -1   -0.02    0.23
  20   8  -1   -0.41    0.33
  20   8  -1   -0.03    0.11
  18  -8  -1    0.46    0.09
  18  -8  -1    0.12    0.22
  18  -8  -1    0.61    0.18
  18  -8  -1    0.53    0.38
 -18  -8   1    0.15    0.27
  18  -8  -1    0.23    0.31
  18  -8  -1    0.69    0.20
  18  -8  -1   -0.06    0.51
  18   8  -1    0.21    0.11
  18   8  -1    0.35    0.27
  18   8  -1    0.16    0.26
  18   8  -1    0.40    0.19
  18   8  -1    0.07    0.23
  18   8  -1   -0.19    0.23
  16  -8  -1    2.93    0.50
 -16  -8   1    4.77    0.42
  16  -8  -1    4.75    0.45
  16  -8  -1    5.38    0.63
  16  -8  -1    4.82    0.43
  16  -8  -1    3.80    0.49
 -16  -8   1    3.43    0.49
  16  -8  -1    3.30    0.41
  16  -8  -1    3.62    0.30
  16   8  -1    3.63    0.26
  16   8  -1    3.27    0.44
 -16   8   1    4.25    0.94
  16   8  -1    2.13    0.31
  16   8  -1    3.33    0.45
  16   8  -1    2.73    0.39
  16   8  -1    2.77    0.36
 -16   8   1    4.77    1.01
 -16   8   1    2.60    1.02
  14  -8  -1    0.15    0.30
  14  -8  -1    0.37    0.19
  14  -8  -1    0.22    0.40
 -14  -8   1    0.33    0.44
 -14  -8   1    0.52    0.48
 -14  -8   1    0.11    0.23
  14  -8  -1    0.43    0.26
 -14  -8   1    0.36    0.17
  14  -8  -1    0.42    0.20
  14  -8  -1    0.10    0.08
  14  -8  -1    0.56    0.37
  14  -8  -1    0.29    0.18
  14  -8  -1    0.44    0.17
 -14   8   1    0.08    0.59
 -14   8   1    0.26    0.28
  14   8  -1    0.28    0.18
 -14   8   1    0.35    0.66
 -14   8   1    0.26    0.53
  14   8  -1    0.31    0.09
  14   8  -1    0.29    0.21
 -14   8   1    0.05    0.29
  14   8  -1    0.24    0.14
  12  -8  -1    4.25    0.41
  12  -8  -1    3.78    0.45
 -12  -8   1    5.13    0.47
  12  -8  -1    3.82    0.45
  12  -8  -1    4.83    0.31
  12  -8  -1    3.76    0.59
  12  -8  -1    4.35    0.40
  12  -8  -1    4.38    0.65
 -12  -8   1    4.89    0.72
  12  -8  -1    4.45    0.50
  12  -8  -1    4.85    0.49
  12  -8  -1    4.46    0.37
  12  -8  -1    4.00    0.40
  12  -8  -1    2.93    2.85
  12  -8  -1    3.80    0.64
 -12  -8   1    3.72    0.63
 -12   8   1    4.13    0.32
  12   8  -1    4.55    0.29
 -12   8   1    3.74    0.50
 -12   8   1    5.70    0.96
  12   8  -1    4.46    0.39
 -12   8   1    3.61    0.36
 -12   8   1    3.17    0.67
  12   8  -1    4.48    0.38
 -12   8   1    3.37    0.50
  12   8  -1    4.44    0.33
 -12   8   1    3.95    0.61
  10  -8  -1    4.17    0.44
  10  -8  -1    4.91    0.49
  10  -8  -1    3.95    0.41
 -10  -8   1    3.84    0.44
  10  -8  -1    4.65    0.53
  10  -8  -1    1.55    2.11
  10  -8  -1    4.11    0.30
  10  -8  -1    4.57    0.61
  10  -8  -1    4.91    0.39
  10  -8  -1    4.10    0.37
 -10  -8   1    3.62    0.58
  10  -8  -1    5.00    0.42
  10  -8  -1    4.86    0.35
  10  -8  -1    4.80    0.59
 -10   8   1    4.63    0.55
  10   8  -1    3.43    0.32
  10   8  -1    3.70    0.39
  10   8  -1    3.52    0.28
 -10   8   1    3.47    0.66
 -10   8   1    3.21    0.59
 -10   8   1    4.20    0.51
 -10   8   1    4.16    0.48
 -10   8   1    3.80    0.27
  10   8  -1    3.73    0.32
 -10   8   1    3.67    0.44
   8  -8  -1   33.97    2.27
   8  -8  -1   36.69    2.99
   8  -8  -1   33.42    2.25
   8  -8  -1   40.60    4.47
   8  -8  -1   37.13    2.24
  -8  -8   1   31.73    2.35
   8  -8  -1   34.86    2.22
   8  -8  -1   36.20    2.30
   8  -8  -1   35.21    2.33
  -8  -8   1   32.74    2.35
   8  -8  -1   35.53    3.90
   8  -8  -1   36.88    3.64
   8  -8  -1   36.15    2.39
   8  -8  -1   35.67    2.36
   8  -8  -1   35.33    2.25
  -8   8   1   33.25    2.12
   8   8  -1   32.73    2.02
  -8   8   1   32.98    2.29
   8   8  -1   30.53    2.03
  -8   8   1   32.10    2.10
  -8   8   1   32.83    2.20
   8   8  -1   29.99    2.00
  -8   8   1   32.70    2.15
   8   8  -1   28.86    1.99
  -8   8   1   30.22    2.00
  -8   8   1   31.60    2.07
  -8   8   1   30.45    1.98
  -8   8   1   29.14    3.77
  -8   8   1   33.59    3.85
   6  -8  -1    0.97    0.25
   6  -8  -1    0.37    0.72
   6  -8  -1    1.06    0.26
   6  -8  -1    0.75    0.78
   6  -8  -1    0.64    0.18
   6  -8  -1    0.74    0.20
   6   8  -1    1.34    0.14
  -6   8   1    1.18    0.95
  -6   8   1    0.83    0.28
   6   8  -1    1.55    0.18
  -6   8   1    0.62    0.83
  -6   8   1    0.88    0.21
   4  -8  -1  260.69   15.49
  -4  -8   1  246.29   15.47
  -4  -8   1  224.90   15.47
   4  -8  -1  258.06   15.82
   4  -8  -1  271.70   16.30
   4  -8  -1  230.13   15.43
   4  -8  -1  236.19   15.47
   4  -8  -1  257.06   16.47
   4  -8  -1  252.04   16.75
  -4  -8   1  241.74   15.43
   4  -8  -1  235.82   15.44
  -4   8   1  233.15   15.15
  -4   8   1  231.06   14.05
  -4   8   1  208.02   13.96
  -4   8   1  206.53   14.24
  -4   8   1  236.03   15.13
  -4   8   1  226.64   14.02
   2  -8  -1  163.33    9.68
   2  -8  -1  138.29    9.07
  -2  -8   1  142.73    9.08
   2  -8  -1  145.72    9.94
   2  -8  -1  141.23    9.07
  -2  -8   1  136.01    9.11
   2  -8  -1  144.07    9.06
   2  -8  -1  149.93    9.06
  -2  -8   1  151.24    9.10
   2  -8  -1  145.32    9.09
   2  -8  -1  132.98    9.94
   2  -8  -1  144.68    9.10
   2  -8  -1  145.40    9.08
  -2   8   1  140.15    9.19
  -2   8   1  145.62    8.43
  -2   8   1  133.07    8.42
  -2   8   1  123.58    8.38
   2   8  -1  138.22    8.39
  -2   8   1  136.24    8.40
   2   8  -1  130.43    8.38
  -2   8   1  122.77    8.36
   0  -8   1   25.76    2.47
   0  -8  -1   27.53    2.39
   0  -8  -1   25.90    2.22
   0  -8   1   27.72    2.56
   0  -8   1   30.70    1.91
   0  -8  -1   31.64    2.36
   0  -8  -1   29.18    2.28
   0  -8   1   31.85    2.46
   0  -8  -1   30.57    1.91
   0  -8   1   30.17    1.91
   0  -8   1   31.17    1.94
   0  -8  -1   32.53    1.94
   0  -8   1   27.69    1.90
   0   8   1   25.88    1.73
   0   8   1   25.51    1.73
   0   8  -1   25.94    1.76
   0   8  -1   29.75    1.76
   0   8  -1   29.47    1.80
   0   8  -1   25.97    1.74
   0   8   1   27.65    1.76
   0   8   1   27.09    1.74
   0   8   1   28.51    2.22
   0   8  -1   29.47    2.25
   2  -8   1  100.37    7.27
   2  -8   1  114.47    7.38
   2  -8   1   92.13    6.40
  -2  -8  -1  107.51    6.43
  -2  -8  -1   99.87    6.41
   2  -8   1   98.34    6.41
   2  -8   1  101.46    6.42
  -2  -8  -1   99.51    6.44
   2  -8   1   99.66    6.49
   2  -8   1  107.61    6.42
  -2   8  -1   98.60    5.85
  -2   8  -1   80.92    6.74
   2   8   1   82.85    5.75
  -2   8  -1   93.92    5.80
  -2   8  -1   97.56    5.82
  -2   8  -1   93.64    5.80
   4  -8   1   42.93    2.71
  -4  -8  -1   42.04    2.79
   4  -8   1   42.45    2.69
   4  -8   1   42.70    2.73
  -4  -8  -1   43.25    2.71
   4  -8   1   40.49    3.82
   4  -8   1   39.30    2.84
   4  -8   1   45.34    3.94
   4  -8   1   38.63    2.70
   4  -8   1   44.14    2.87
   4  -8   1   44.87    2.74
  -4  -8  -1   45.51    2.77
  -4   8  -1   39.84    2.60
  -4   8  -1   42.35    2.67
  -4   8  -1   40.22    2.63
  -4   8  -1   40.32    2.60
  -4   8  -1   37.33    4.44
  -4   8  -1   42.56    3.67
  -4   8  -1   39.83    2.60
  -4   8  -1   33.79    3.77
   6  -8   1   39.90    3.91
   6  -8   1   35.66    2.24
   6  -8   1   37.35    2.27
   6  -8   1   38.28    2.47
   6  -8   1   37.80    2.35
   6  -8   1   32.04    3.65
   6  -8   1   31.23    2.24
   6  -8   1   37.22    2.30
  -6  -8  -1   32.69    2.23
  -6  -8  -1   33.36    2.33
   6  -8   1   32.86    2.21
   6  -8   1   33.23    2.24
  -6  -8  -1   35.02    2.35
  -6   8  -1   32.31    2.10
  -6   8  -1   31.16    2.22
  -6   8  -1   31.33    2.03
  -6   8  -1   31.58    2.02
  -6   8  -1   37.66    3.65
  -6   8  -1   32.48    2.12
   6   8   1   32.96    2.02
   6   8   1   30.09    2.05
  -6   8  -1   30.79    2.14
  -6   8  -1   39.24    4.23
  -6   8  -1   31.98    2.16
   8  -8   1   17.05    1.31
   8  -8   1   15.37    0.98
   8  -8   1   16.33    1.03
   8  -8   1   14.33    0.99
   8  -8   1   14.82    1.08
  -8  -8  -1   12.65    0.96
   8  -8   1   14.45    1.16
   8  -8   1   14.39    1.00
  -8  -8  -1   13.51    1.16
   8  -8   1   15.13    0.99
  -8   8  -1   15.79    2.98
  -8   8  -1   13.54    0.88
  -8   8  -1   12.95    1.04
  -8   8  -1   13.32    1.01
  -8   8  -1   14.34    0.85
   8   8   1   12.83    0.87
  -8   8  -1   13.23    0.97
  -8   8  -1   11.90    1.14
  -8   8  -1   12.69    1.03
  10  -8   1   11.89    1.00
  10  -8   1   11.83    0.86
  10  -8   1   13.19    0.85
  10  -8   1   12.11    0.87
  10  -8   1   11.38    1.07
  10  -8   1   14.13    0.92
 -10  -8  -1   11.78    0.86
 -10  -8  -1   12.90    1.14
  10  -8   1   14.07    0.91
  10  -8   1   15.45    1.32
 -10   8  -1    9.52    0.93
 -10   8  -1   11.65    3.36
 -10   8  -1   11.65    0.77
 -10   8  -1   12.50    1.05
 -10   8  -1   10.20    0.90
  10   8   1   11.57    0.75
 -10   8  -1   12.59    0.94
  10   8   1   11.98    0.73
  12  -8   1    1.19    0.22
  12  -8   1    1.83    0.28
  12  -8   1    1.44    0.21
  12  -8   1    1.20    0.43
  12  -8   1    0.86    0.25
  12  -8   1    1.50    0.39
  12  -8   1    1.46    0.26
 -12  -8  -1    1.40    0.28
 -12  -8  -1    1.24    0.22
  12  -8   1    1.13    0.13
  12  -8   1    1.53    0.21
  12  -8   1    1.41    0.21
  12  -8   1    4.81    4.00
 -12  -8  -1    1.02    0.50
  12   8   1    1.22    0.15
 -12   8  -1    1.13    0.24
 -12   8  -1    0.95    0.35
 -12   8  -1    1.28    0.62
 -12   8  -1    0.01    0.60
 -12   8  -1    1.02    0.52
 -12   8  -1    1.16    0.34
  12   8   1    1.44    0.17
  12   8   1    1.26    0.21
  14  -8   1    0.33    0.18
  14  -8   1    0.32    0.10
 -14  -8  -1    0.17    0.19
  14  -8   1    0.43    0.34
  14  -8   1    0.26    0.40
  14  -8   1    0.20    0.21
  14  -8   1    0.53    0.28
  14  -8   1    0.14    0.16
  14  -8   1    0.41    0.25
 -14  -8  -1    0.31    0.26
  14  -8   1    0.58    0.20
 -14   8  -1   -0.90    0.69
 -14   8  -1    0.16    0.29
 -14   8  -1   -0.48    0.78
 -14   8  -1    0.76    1.16
 -14   8  -1    0.01    0.28
  14   8   1    0.35    0.15
  14   8   1    0.41    0.23
  14   8   1    0.28    0.17
 -16  -8  -1   -0.16    0.24
  16  -8   1    0.03    0.08
  16  -8   1    0.02    0.20
 -16  -8  -1    0.23    0.21
  16  -8   1   -0.27    0.46
  16  -8   1   -0.14    0.25
  16  -8   1   -0.18    0.40
  16  -8   1    0.34    0.45
  16  -8   1    0.21    0.19
  16  -8   1   -0.26    0.27
  16   8   1   -0.10    0.16
  16   8   1   -0.07    0.23
  16   8   1   -0.10    0.23
  16   8   1    0.06    0.24
 -16   8  -1    0.86    0.89
 -16   8  -1   -0.05    0.25
  16   8   1   -0.27    0.16
  16   8   1    0.01    0.09
  18  -8   1    2.62    0.55
 -18  -8  -1    0.88    0.33
  18  -8   1    0.84    0.28
  18  -8   1    1.04    0.30
  18  -8   1    1.54    0.24
  18  -8   1    1.75    0.27
 -18   8  -1    1.00    0.33
  18   8   1    0.78    0.27
  18   8   1    0.94    0.33
  18   8   1    0.91    0.25
  18   8   1    1.23    0.30
  20  -8   1    0.09    0.24
 -20  -8  -1    0.09    0.27
  20  -8   1    0.24    0.23
  20   8   1    0.59    0.38
  20   8   1    0.20    0.24
  20   8   1    0.04    0.12
 -19  -9   1   -0.04    0.25
  19  -9  -1    0.53    0.25
  19  -9  -1   -0.01    0.27
  19  -9  -1   -0.07    0.25
  19  -9  -1    0.16    0.50
  19   9  -1    0.19    0.27
  19   9  -1    0.66    0.40
  19   9  -1    0.14    0.26
  19   9  -1    0.21    0.20
  19   9  -1    0.13    0.13
  17  -9  -1    5.76    0.70
  17  -9  -1    4.81    0.44
  17  -9  -1    3.68    0.49
  17  -9  -1    4.82    0.54
  17  -9  -1    5.14    0.46
  17   9  -1    4.47    0.39
 -17   9   1    1.96    1.39
  17   9  -1    4.23    0.52
  17   9  -1    4.57    0.49
  17   9  -1    3.96    0.47
  17   9  -1    4.04    0.32
  15  -9  -1    3.68    0.39
  15  -9  -1    3.97    0.40
  15  -9  -1    2.24    0.49
  15  -9  -1    3.86    0.40
 -15  -9   1    3.26    0.34
 -15  -9   1    3.14    0.47
  15  -9  -1    3.05    0.25
  15  -9  -1    2.62    0.36
  15  -9  -1    3.03    0.46
 -15   9   1    1.87    0.80
 -15   9   1    2.43    0.94
  15   9  -1    2.85    0.48
  15   9  -1    3.10    0.38
  15   9  -1    3.03    0.25
 -15   9   1    2.82    0.74
  15   9  -1    3.37    0.32
  15   9  -1    2.91    0.36
 -13  -9   1    3.98    0.66
 -13  -9   1    2.75    0.67
 -13  -9   1    2.54    0.45
  13  -9  -1    3.13    0.44
  13  -9  -1    3.71    0.25
  13  -9  -1    4.04    0.48
  13  -9  -1    2.20    0.70
 -13  -9   1    3.93    0.74
 -13  -9   1    3.15    0.36
  13  -9  -1    3.95    0.39
  13  -9  -1    2.39    0.54
  13  -9  -1    2.33    0.50
  13  -9  -1    4.53    4.30
 -13   9   1    7.17    1.69
  13   9  -1    3.78    0.26
  13   9  -1    3.42    0.31
  13   9  -1    3.53    0.36
 -13   9   1    3.22    0.51
 -13   9   1    3.46    0.67
 -13   9   1    2.82    0.26
  11  -9  -1    3.71    0.33
  11  -9  -1    4.02    0.42
  11  -9  -1    3.62    0.36
  11  -9  -1    2.96    0.53
 -11  -9   1    3.75    0.63
 -11  -9   1    4.33    0.43
  11  -9  -1    1.87    2.30
 -11  -9   1    4.67    0.56
  11  -9  -1    3.32    0.55
 -11  -9   1    5.48    0.75
  11  -9  -1    3.89    0.46
  11  -9  -1    3.53    0.37
  11  -9  -1    3.65    0.36
  11  -9  -1    3.62    0.27
  11  -9  -1    3.47    0.52
 -11   9   1    3.11    0.46
 -11   9   1    3.25    0.43
 -11   9   1    3.26    0.48
 -11   9   1    3.33    0.67
 -11   9   1    2.73    0.59
 -11   9   1    3.37    0.52
  11   9  -1    3.44    0.26
 -11   9   1    3.15    0.33
  11   9  -1    4.02    0.33
  11   9  -1    3.98    0.33
 -11   9   1    3.00    0.26
 -11   9   1    2.97    0.49
  11   9  -1    3.64    0.27
   9  -9  -1    6.72    1.30
   9  -9  -1    7.75    0.63
   9  -9  -1    4.77    1.67
   9  -9  -1    8.17    0.57
   9  -9  -1    6.51    0.73
  -9  -9   1    8.22    0.76
  -9  -9   1    8.34    0.77
   9  -9  -1    7.32    0.59
   9  -9  -1    7.50    0.73
   9  -9  -1    8.15    0.60
   9  -9  -1    8.81    0.57
   9  -9  -1    6.95    0.68
   9   9  -1    6.11    0.45
  -9   9   1    7.35    0.46
   9   9  -1    6.43    0.48
  -9   9   1    7.64    0.90
  -9   9   1    6.66    0.66
  -9   9   1    6.66    0.78
   9   9  -1    6.04    0.53
  -9   9   1    7.16    0.63
   9   9  -1    7.19    0.49
  -9   9   1    7.82    0.68
  -9   9   1    7.32    0.60
   7  -9  -1    9.99    1.83
  -7  -9   1   13.04    1.01
   7  -9  -1   14.35    0.95
  -7  -9   1   12.91    0.88
   7  -9  -1   14.47    0.91
   7  -9  -1   13.92    0.92
   7  -9  -1   15.95    2.66
   7  -9  -1   13.48    1.03
   7  -9  -1   13.64    0.98
   7  -9  -1   10.02    2.49
   7  -9  -1   12.02    1.00
  -7   9   1   14.61    1.01
  -7   9   1   10.03    2.58
  -7   9   1   13.21    1.13
  -7   9   1   13.03    1.08
   7   9  -1   14.73    0.92
  -7   9   1   15.59    1.06
  -7   9   1   15.12    0.92
   5  -9  -1   12.79    1.37
   5  -9  -1   16.42    2.21
   5  -9  -1   13.41    0.91
  -5  -9   1   13.54    0.88
   5  -9  -1   13.61    0.94
   5  -9  -1   13.24    0.89
  -5  -9   1   14.21    0.97
   5  -9  -1   14.23    0.92
   5  -9  -1   13.15    0.88
   5  -9  -1   12.42    1.68
  -5  -9   1   13.46    0.98
   5  -9  -1   11.97    0.95
   5  -9  -1   13.03    0.95
   5  -9  -1   11.38    1.90
  -5   9   1   11.90    0.94
  -5   9   1   12.13    1.94
  -5   9   1   11.45    0.90
  -5   9   1   12.51    1.04
  -5   9   1   12.95    0.88
  -5   9   1   10.45    1.94
  -5   9   1   12.86    0.85
  -5   9   1   11.79    0.87
   3  -9  -1   20.37    2.72
   3  -9  -1   20.77    1.39
   3  -9  -1   25.33    2.33
   3  -9  -1   20.02    1.36
   3  -9  -1   22.23    1.37
   3  -9  -1   22.85    2.45
   3  -9  -1   24.27    2.10
  -3  -9   1   20.43    1.41
  -3  -9   1   22.13    1.38
   3  -9  -1   21.75    1.37
  -3  -9   1   18.51    1.42
  -3   9   1   21.49    1.33
  -3   9   1   22.52    2.29
  -3   9   1   20.08    1.36
  -3   9   1   19.26    1.34
  -3   9   1   20.13    1.34
  -3   9   1   21.32    2.31
  -3   9   1   18.50    1.28
  -1  -9   1   70.25    5.07
   1  -9  -1   57.94    3.78
  -1  -9   1   55.51    3.78
  -1  -9   1   55.65    3.79
   1  -9  -1   66.83    4.32
  -1  -9   1   57.22    4.40
   1  -9  -1   53.66    4.50
   1  -9  -1   59.74    4.45
   1  -9  -1   62.25    3.77
   1  -9  -1   61.21    3.79
  -1  -9   1   57.09    3.80
   1  -9  -1   61.11    3.78
  -1  -9   1   62.29    3.80
  -1   9   1   52.46    4.21
   1   9  -1   54.68    3.54
  -1   9   1   56.38    3.53
   1   9  -1   60.68    3.58
  -1   9   1   51.71    3.53
  -1   9   1   55.33    3.56
  -1   9   1   59.81    3.55
   1  -9   1   81.36    5.37
  -1  -9  -1   83.08    5.57
   1  -9   1   83.28    6.27
   1  -9   1   88.44    5.32
   1  -9   1   88.61    5.32
   1  -9   1   86.56    5.31
  -1  -9  -1   86.31    5.31
   1  -9   1   86.15    6.16
  -1  -9  -1   78.23    5.33
  -1  -9  -1   80.86    5.57
   1  -9   1   77.56    5.31
  -1  -9  -1   88.98    5.32
  -1   9  -1   71.26    4.55
   1   9   1   69.67    4.55
  -1   9  -1   80.59    4.60
   1   9   1   69.05    4.55
   3  -9   1   80.50    4.91
   3  -9   1   86.68    4.94
   3  -9   1   77.05    4.92
   3  -9   1   73.02    6.10
   3  -9   1   84.02    6.10
   3  -9   1   78.59    4.92
   3  -9   1   77.83    4.92
  -3  -9  -1   72.58    4.92
   3  -9   1   77.61    5.04
  -3  -9  -1   70.73    4.96
   3  -9   1   77.92    4.91
  -3  -9  -1   78.81    5.08
  -3   9  -1   76.33    4.61
  -3   9  -1   74.06    4.63
  -3   9  -1   73.86    4.69
  -3   9  -1   68.38    4.57
  -3   9  -1   79.43    5.70
  -3   9  -1   60.29    5.94
  -3   9  -1   73.75    4.64
  -3   9  -1   73.16    4.66
   5  -9   1    5.41    0.65
   5  -9   1    5.90    0.48
   5  -9   1    3.72    1.49
   5  -9   1    7.41    0.50
  -5  -9  -1    7.65    0.62
  -5  -9  -1    7.40    0.49
   5  -9   1    6.47    0.46
   5  -9   1    5.50    0.52
  -5   9  -1    4.95    1.92
   5   9   1    4.19    0.30
   5   9   1    3.03    0.34
  -5   9  -1    3.98    1.35
  -5   9  -1    2.61    1.37
   7  -9   1   16.40    1.16
   7  -9   1   18.23    1.20
  -7  -9  -1   17.47    1.17
  -7  -9  -1   16.79    1.29
   7  -9   1   18.04    1.16
   7  -9   1   16.86    1.16
   7  -9   1   17.95    1.26
   7  -9   1   16.28    1.28
   7  -9   1   16.12    2.72
  -7  -9  -1   19.63    1.34
   7  -9   1   17.52    1.15
  -7   9  -1   15.62    1.28
  -7   9  -1   16.30    2.90
  -7   9  -1   14.51    2.55
  -7   9  -1   16.29    1.11
  -7   9  -1   16.17    0.99
  -7   9  -1   17.39    1.18
  -7   9  -1   16.23    1.18
   7   9   1   14.43    1.00
  -7   9  -1   15.86    1.12
   7   9   1   13.34    1.05
   9  -9   1   25.40    1.69
   9  -9   1   25.91    1.74
   9  -9   1   27.33    1.70
   9  -9   1   27.34    1.66
   9  -9   1   23.33    1.72
   9  -9   1   27.83    1.71
   9  -9   1   26.76    1.81
   9  -9   1   28.14    2.07
   9  -9   1   25.28    1.72
   9  -9   1   26.58    1.97
   9  -9   1   27.13    1.69
  -9  -9  -1   24.78    1.94
  -9   9  -1   23.37    1.78
  -9   9  -1   21.95    3.99
  -9   9  -1   24.84    1.67
  -9   9  -1   24.64    1.75
  -9   9  -1   24.44    1.53
  -9   9  -1   24.14    1.58
  -9   9  -1   23.83    1.67
  -9   9  -1   26.18    1.56
   9   9   1   24.72    1.56
  -9   9  -1   21.78    1.84
   9   9   1   22.59    1.53
  11  -9   1   16.94    1.14
  11  -9   1   16.24    1.10
  11  -9   1   14.85    1.25
  11  -9   1   15.44    1.18
  11  -9   1   16.43    1.11
  11  -9   1   15.35    1.33
  11  -9   1   18.33    1.07
  11  -9   1   17.16    1.10
  11  -9   1   18.51    1.15
 -11  -9  -1   16.04    1.12
 -11   9  -1   15.38    1.04
 -11   9  -1   14.04    1.27
  11   9   1   16.66    0.99
  11   9   1   16.69    1.03
  11   9   1   15.61    0.97
 -11   9  -1   13.34    1.14
 -11   9  -1   12.61    1.18
 -11   9  -1   15.90    0.98
 -11   9  -1   14.45    1.01
  13  -9   1    1.73    0.23
  13  -9   1    1.85    0.29
 -13  -9  -1    1.50    0.32
  13  -9   1    1.74    0.43
  13  -9   1    1.98    0.25
  13  -9   1    2.36    0.32
  13  -9   1    2.00    0.32
 -13  -9  -1    1.58    0.25
  13  -9   1    1.10    0.49
  13  -9   1   -3.56    5.06
  13  -9   1    1.75    0.18
  13  -9   1    1.61    0.22
 -13   9  -1    1.19    0.27
 -13   9  -1    0.87    0.65
 -13   9  -1    1.37    0.60
 -13   9  -1    1.51    0.38
  13   9   1    1.76    0.20
 -13   9  -1    1.10    0.40
 -13   9  -1    0.75    0.77
  13   9   1    1.60    0.16
  13   9   1    1.45    0.23
 -15  -9  -1    0.82    0.29
  15  -9   1    1.31    0.30
  15  -9   1    1.44    0.24
  15  -9   1    0.86    0.39
  15  -9   1    0.98    0.26
 -15  -9  -1    1.12    0.23
  15  -9   1    0.93    0.12
  15  -9   1    1.24    0.50
  15  -9   1    1.51    0.32
  15   9   1    1.26    0.28
 -15   9  -1    1.32    0.90
 -15   9  -1    0.76    0.44
  15   9   1    1.21    0.28
  15   9   1    0.99    0.23
 -15   9  -1    0.89    0.92
 -15   9  -1    0.79    0.33
  15   9   1    1.23    0.21
 -15   9  -1    0.46    0.78
  15   9   1    1.35    0.15
  17  -9   1    1.74    0.29
 -17  -9  -1    1.55    0.35
  17  -9   1    1.82    0.25
  17  -9   1    1.16    0.30
  17  -9   1    0.88    0.52
  17  -9   1    0.96    0.26
  17  -9   1    2.08    0.40
  17   9   1    1.92    0.32
  17   9   1    1.23    0.29
  17   9   1    1.08    0.21
  17   9   1    1.52    0.18
  19  -9   1   -0.23    0.47
  19  -9   1   -0.06    0.48
 -19  -9  -1   -0.01    0.23
  19   9   1    0.05    0.45
  19   9   1    0.71    0.38
  19   9   1   -0.01    0.21
  19   9   1    0.01    0.14
  20 -10  -1    0.63    0.25
  20 -10  -1    0.46    0.86
  20 -10  -1    0.14    0.27
 -20 -10   1    0.09    0.32
  20  10  -1    0.11    0.28
  20  10  -1    0.83    0.38
  20  10  -1    0.03    0.12
  20  10  -1    0.11    0.45
  18 -10  -1    1.27    0.41
  18 -10  -1    1.03    0.23
  18 -10  -1    1.10    0.34
  18 -10  -1    0.89    0.30
  18 -10  -1    0.39    0.52
  18  10  -1    0.75    0.29
  18  10  -1    1.42    0.37
  18  10  -1    1.10    0.28
  18  10  -1    0.73    0.37
  18  10  -1    0.82    0.14
 -16 -10   1    6.45    0.70
 -16 -10   1    8.10    0.57
  16 -10  -1    6.14    0.64
  16 -10  -1    8.20    0.63
  16  10  -1    5.87    0.54
 -16  10   1    3.78    0.96
 -16  10   1    4.23    0.79
  16  10  -1    6.66    0.59
 -16  10   1    3.51    1.16
  16  10  -1    5.80    0.41
  16  10  -1    6.49    0.47
 -14 -10   1    2.74    0.33
  14 -10  -1   -2.49    4.97
  14 -10  -1    2.32    0.22
  14 -10  -1    1.86    0.44
  14 -10  -1    3.63    0.52
  14 -10  -1    3.14    0.35
 -14 -10   1    3.85    0.69
  14 -10  -1    3.69    0.46
  14 -10  -1    2.79    0.35
  14 -10  -1    3.53    0.38
 -14 -10   1    2.45    0.43
 -14  10   1    2.24    0.91
  14  10  -1    2.14    0.30
  14  10  -1    2.59    0.28
 -14  10   1    1.49    0.37
 -14  10   1    1.16    0.78
 -14  10   1    2.31    0.32
 -14  10   1    1.69    0.43
  14  10  -1    2.54    0.32
  14  10  -1    2.51    0.21
 -14  10   1    2.90    0.93
 -12 -10   1    0.23    0.21
 -12 -10   1    0.69    0.46
  12 -10  -1    0.41    0.21
 -12 -10   1    1.06    0.38
  12 -10  -1    0.20    0.34
  12 -10  -1    0.39    0.23
  12 -10  -1   -4.58    2.89
 -12 -10   1    0.70    0.47
  12 -10  -1    0.30    0.08
  12 -10  -1    0.29    0.29
  12 -10  -1    0.46    0.20
 -12 -10   1    0.10    0.17
  12 -10  -1    0.26    0.15
  12 -10  -1    0.33    0.17
 -12  10   1    0.31    0.17
 -12  10   1    0.16    0.09
 -12  10   1    0.20    0.29
 -12  10   1    0.08    0.69
  12  10  -1    0.46    0.16
  12  10  -1    0.27    0.13
 -12  10   1    0.33    0.28
 -12  10   1    0.71    0.23
 -12  10   1    0.07    0.45
 -12  10   1    0.26    0.37
 -12  10   1   -0.06    0.29
  10 -10  -1    2.67    1.96
 -10 -10   1    4.03    0.64
 -10 -10   1    3.78    0.42
  10 -10  -1    3.71    0.26
  10 -10  -1    3.38    0.56
  10 -10  -1    3.80    0.44
  10 -10  -1    3.93    0.37
  10 -10  -1    3.41    0.34
  10 -10  -1    4.41    0.58
 -10 -10   1    3.66    0.61
  10 -10  -1    3.88    0.35
  10 -10  -1    3.50    0.44
  10 -10  -1    3.79    0.51
  10  10  -1    3.37    0.27
 -10  10   1    3.55    0.47
 -10  10   1    4.15    0.56
 -10  10   1    3.55    0.53
 -10  10   1    2.40    0.60
 -10  10   1    3.66    0.45
 -10  10   1    3.94    0.33
  10  10  -1    4.13    0.38
 -10  10   1    3.11    0.63
 -10  10   1    3.31    0.27
  -8 -10   1   23.24    1.56
  -8 -10   1   21.36    1.39
   8 -10  -1   23.31    1.41
   8 -10  -1   18.26    3.35
   8 -10  -1   21.77    1.47
   8 -10  -1   20.37    1.53
   8 -10  -1   22.68    2.43
   8 -10  -1   19.52    1.43
   8 -10  -1   21.55    1.43
   8 -10  -1   21.08    1.49
   8 -10  -1   21.55    1.42
  -8 -10   1   22.65    1.57
   8 -10  -1   21.47    1.55
  -8  10   1   20.34    1.65
   8  10  -1   19.12    1.25
  -8  10   1   18.95    1.37
  -8  10   1   19.28    1.26
   8  10  -1   20.69    1.29
  -8  10   1   19.03    1.49
  -8  10   1   20.22    1.40
  -8  10   1   19.27    1.24
  -8  10   1   18.46    1.42
  -8  10   1   19.69    1.34
   6 -10  -1   59.42    3.61
   6 -10  -1   59.65    4.26
   6 -10  -1   56.30    5.14
   6 -10  -1   56.73    3.65
  -6 -10   1   58.22    3.71
  -6 -10   1   61.72    3.71
  -6 -10   1   56.34    3.61
   6 -10  -1   53.50    3.61
   6 -10  -1   59.01    3.67
   6 -10  -1   59.58    4.87
   6 -10  -1   57.31    3.68
   6 -10  -1   54.25    3.69
   6 -10  -1   51.18    3.62
   6 -10  -1   56.89    3.63
  -6  10   1   49.24    3.43
  -6  10   1   53.46    3.34
  -6  10   1   51.91    3.26
  -6  10   1   48.51    3.15
  -6  10   1   50.42    3.17
  -6  10   1   48.21    4.87
  -6  10   1   49.56    3.25
  -6  10   1   48.44    4.77
  -6  10   1   50.46    3.30
   4 -10  -1   22.44    2.18
   4 -10  -1   21.23    1.30
  -4 -10   1   18.39    1.35
   4 -10  -1   19.11    1.29
   4 -10  -1   22.01    2.43
   4 -10  -1   19.34    2.41
  -4 -10   1   19.42    1.29
   4 -10  -1   17.48    1.30
   4 -10  -1   19.83    1.27
  -4 -10   1   20.65    1.35
  -4  10   1   17.42    1.20
  -4  10   1   19.11    1.26
  -4  10   1   15.97    1.16
  -4  10   1   16.20    1.12
  -4  10   1   19.92    2.35
  -4  10   1   19.28    2.41
  -4  10   1   18.53    1.24
  -4  10   1   16.97    1.19
   2 -10  -1   42.18    3.32
  -2 -10   1   38.16    2.47
   2 -10  -1   37.15    2.43
   2 -10  -1   37.01    2.46
  -2 -10   1   36.58    2.45
   2 -10  -1   43.07    3.15
   2 -10  -1   36.79    3.48
   2  10  -1   34.39    2.22
  -2  10   1   36.15    2.27
   2  10  -1   33.94    2.24
  -2  10   1   34.74    3.12
  -2  10   1   33.21    2.19
   2  10  -1   33.02    2.22
  -2  10   1   34.55    2.22
  -2  10   1   38.06    3.22
  -2  10   1   38.32    2.24
   2  10  -1   33.36    2.20
   0 -10  -1   64.70    4.15
   0 -10   1   68.87    4.14
   0 -10   1   64.01    4.15
   0 -10  -1   57.16    4.52
   0 -10   1   65.89    4.99
   0 -10   1   68.00    4.18
   0 -10  -1   60.72    4.11
   0 -10   1   67.55    4.77
   0 -10  -1   63.44    5.09
   0 -10   1   67.47    4.15
   0 -10  -1   65.11    4.14
   0 -10  -1   67.64    4.13
   0 -10  -1   68.06    4.68
   0 -10  -1   64.58    4.61
   0  10  -1   64.77    3.86
   0  10   1   57.60    3.77
   0  10   1   59.54    4.39
   0  10   1   62.75    3.79
   0  10  -1   57.04    3.76
   0  10  -1   64.98    4.44
   0  10  -1   60.98    3.83
   0  10   1   60.85    3.82
   0  10  -1   64.47    3.81
   0  10   1   53.83    3.80
   0  10  -1   57.63    3.79
   0  10   1   57.18    3.78
   2 -10   1   25.65    1.73
  -2 -10  -1   27.48    1.76
   2 -10   1   26.64    2.67
   2 -10   1   27.32    1.73
   2 -10   1   29.05    1.74
   2 -10   1   25.44    2.74
  -2 -10  -1   25.31    1.77
   2 -10   1   23.92    1.82
  -2 -10  -1   28.32    1.74
  -2  10  -1   26.09    1.70
  -2  10  -1   24.54    1.63
  -2  10  -1   22.02    1.56
  -2  10  -1   25.27    1.66
  -2  10  -1   27.95    2.56
   2  10   1   25.77    1.61
   2  10   1   23.05    1.60
  -2  10  -1   25.22    1.64
  -4 -10  -1   34.92    2.28
   4 -10   1   35.56    2.23
   4 -10   1   34.64    2.19
  -4 -10  -1   33.43    2.29
   4 -10   1   35.61    2.24
   4 -10   1   33.78    2.21
   4 -10   1   34.44    2.24
   4 -10   1   29.22    3.43
   4 -10   1   31.92    2.20
   4 -10   1   31.81    2.21
  -4 -10  -1   37.66    2.22
   4 -10   1   34.85    2.21
   4 -10   1   36.32    2.39
   4 -10   1   35.40    2.23
  -4  10  -1   32.57    2.01
  -4  10  -1   31.89    2.13
  -4  10  -1   30.45    2.04
  -4  10  -1   31.34    2.05
  -4  10  -1   30.80    1.96
  -4  10  -1   33.77    3.29
  -4  10  -1   31.80    2.08
  -4  10  -1   28.40    1.94
  -4  10  -1   24.43    3.33
   6 -10   1   30.52    2.12
   6 -10   1   26.18    4.02
   6 -10   1   36.35    2.13
  -6 -10  -1   32.74    2.12
   6 -10   1   31.76    2.19
   6 -10   1   34.10    2.15
   6 -10   1   35.12    2.10
  -6 -10  -1   32.52    2.23
   6 -10   1   33.09    2.35
   6 -10   1   29.89    2.19
  -6 -10  -1   34.98    2.26
   6 -10   1   33.03    2.12
  -6  10  -1   30.72    2.17
  -6  10  -1   32.07    2.08
  -6  10  -1   33.27    4.49
  -6  10  -1   29.25    1.93
  -6  10  -1   30.10    2.05
  -6  10  -1   30.42    2.09
  -6  10  -1   37.96    5.71
  -6  10  -1   30.39    2.02
  -6  10  -1   30.25    1.95
   8 -10   1    1.42    0.36
  -8 -10  -1    2.59    0.47
   8 -10   1    1.87    0.23
  -8 -10  -1    2.88    0.53
  -8 -10  -1    2.44    0.36
   8 -10   1    1.73    0.46
   8 -10   1    1.95    0.27
   8 -10   1    2.20    0.27
   8 -10   1    2.37    0.29
   8 -10   1    1.74    0.33
  -8 -10  -1    2.47    0.24
  -8  10  -1    1.04    0.44
  -8  10  -1    1.90    0.24
   8  10   1    2.26    0.20
  -8  10  -1    1.82    3.05
  -8  10  -1    1.90    0.34
  -8  10  -1    1.59    0.36
  -8  10  -1    1.62    0.38
  -8  10  -1    1.58    0.30
  -8  10  -1    2.20    0.18
  -8  10  -1    1.98    0.30
  10 -10   1    9.45    0.64
 -10 -10  -1    7.63    0.90
  10 -10   1    8.92    0.65
  10 -10   1    7.80    0.76
  10 -10   1    7.83    0.58
  10 -10   1    9.76    0.67
  10 -10   1    8.60    0.68
  10 -10   1    9.64    0.69
  10 -10   1    9.45    0.63
 -10 -10  -1    8.81    0.72
 -10  10  -1    7.03    0.70
 -10  10  -1    6.58    0.94
  10  10   1    8.59    0.53
 -10  10  -1    9.56    0.78
 -10  10  -1    7.46    0.53
 -10  10  -1    6.80    0.77
 -10  10  -1    8.84    0.88
  10  10   1    8.44    0.57
  12 -10   1    7.21    0.86
  12 -10   1    0.08    6.92
  12 -10   1    8.85    0.69
  12 -10   1    8.74    0.65
  12 -10   1    8.98    0.65
  12 -10   1    8.58    0.66
  12 -10   1    8.02    0.56
 -12 -10  -1    9.46    0.74
  12 -10   1    7.94    0.80
 -12  10  -1    7.18    1.57
 -12  10  -1    6.26    0.48
 -12  10  -1    6.47    1.07
 -12  10  -1    5.75    0.75
  12  10   1    7.29    0.48
  12  10   1    8.02    0.55
  12  10   1    7.98    0.51
 -12  10  -1    6.78    0.89
 -12  10  -1    6.91    0.71
  14 -10   1    0.38    0.16
 -14 -10  -1    0.53    0.20
  14 -10   1   -0.03    0.19
  14 -10   1    0.34    0.10
  14 -10   1    0.51    0.20
  14 -10   1    0.28    0.24
 -14 -10  -1    0.21    0.26
  14 -10   1    0.09    0.37
  14 -10   1    0.17    0.31
  14 -10   1    0.19    0.26
  14  10   1    0.29    0.15
 -14  10  -1    0.45    0.62
 -14  10  -1    0.79    0.66
 -14  10  -1    0.34    0.30
  14  10   1    0.32    0.09
  14  10   1    0.24    0.17
 -14  10  -1   -0.50    1.12
 -14  10  -1    0.01    0.31
  16 -10   1    1.63    0.28
  16 -10   1    1.45    0.51
  16 -10   1    2.35    0.32
 -16 -10  -1    2.48    0.34
  16 -10   1    2.31    0.34
 -16 -10  -1    1.69    0.35
  16  10   1    3.07    0.48
  16  10   1    2.20    0.22
  16  10   1    2.24    0.33
  16  10   1    2.18    0.26
 -16  10  -1    0.70    1.54
  18 -10   1    1.32    0.30
 -18 -10  -1    0.81    0.35
  18 -10   1    1.25    0.27
  18  10   1    0.94    0.29
  18  10   1    1.32    0.16
  18  10   1    1.16    0.23
  18  10   1    1.39    0.31
 -19 -11   1    0.11    0.31
  19 -11  -1   -0.02    0.26
  19 -11  -1    0.22    0.28
  19 -11  -1    0.69    0.61
  19  11  -1    0.51    0.22
  19  11  -1    0.57    0.44
  19  11  -1    0.13    0.27
  17 -11  -1    0.66    0.41
  17 -11  -1    0.77    0.35
  17 -11  -1    0.37    0.24
 -17 -11   1    0.15    0.27
  17 -11  -1    0.17    0.45
  17  11  -1    0.71    0.26
  17  11  -1    0.35    0.11
  17  11  -1    0.52    0.26
  17  11  -1    0.21    0.16
  17  11  -1    0.37    0.26
 -17  11   1   -0.05    0.36
  15 -11  -1    0.72    0.42
  15 -11  -1    1.27    0.30
  15 -11  -1    1.24    0.40
  15 -11  -1    1.17    0.19
  15 -11  -1    1.90    0.34
 -15 -11   1    1.64    0.36
 -15 -11   1    0.87    0.58
 -15 -11   1    1.69    0.29
 -15  11   1    0.76    0.38
  15  11  -1    1.92    0.35
  15  11  -1    1.39    0.23
 -15  11   1    1.23    0.72
 -15  11   1    0.95    0.36
  15  11  -1    1.61    0.15
 -15  11   1    1.56    0.72
  15  11  -1    1.29    0.24
  13 -11  -1    0.22    0.20
  13 -11  -1    0.43    0.22
  13 -11  -1    0.30    0.18
 -13 -11   1    0.50    0.51
  13 -11  -1   -0.03    0.21
  13 -11  -1    0.17    0.25
  13 -11  -1    0.23    0.30
 -13 -11   1    0.36    0.38
 -13 -11   1    0.17    0.55
  13 -11  -1   -0.12    0.33
  13 -11  -1   -2.78    3.78
 -13 -11   1    0.04    0.24
 -13  11   1    0.36    0.19
 -13  11   1   -0.15    0.33
 -13  11   1    0.20    0.43
 -13  11   1    0.22    0.51
  13  11  -1    0.28    0.07
  13  11  -1    0.29    0.16
  13  11  -1    0.40    0.21
  13  11  -1    0.27    0.12
 -13  11   1   -0.03    0.36
 -13  11   1   -1.28    1.02
 -13  11   1    0.56    0.28
 -13  11   1    0.17    0.29
 -13  11   1    0.19    0.10
  11 -11  -1    6.36    0.62
  11 -11  -1    3.47    2.63
  11 -11  -1    7.10    0.59
  11 -11  -1    6.70    0.55
  11 -11  -1    7.73    0.59
 -11 -11   1    6.50    0.79
 -11 -11   1    7.37    0.86
  11 -11  -1    5.62    0.66
 -11 -11   1    6.09    0.52
  11 -11  -1    5.87    0.72
  11 -11  -1    6.96    0.52
 -11  11   1    6.21    0.65
  11  11  -1    6.98    0.48
 -11  11   1    5.04    0.72
  11  11  -1    6.67    0.43
 -11  11   1    4.94    0.85
 -11  11   1    7.22    0.54
 -11  11   1    6.05    0.43
 -11  11   1    6.70    0.57
 -11  11   1    5.04    0.68
 -11  11   1    5.77    0.98
 -11  11   1    5.07    0.64
   9 -11  -1   16.36    1.00
  -9 -11   1   13.91    1.17
   9 -11  -1   14.24    0.98
   9 -11  -1   12.90    1.04
  -9 -11   1   14.37    1.29
   9 -11  -1   16.41    1.10
   9 -11  -1   10.67    2.52
   9 -11  -1   14.42    1.01
   9 -11  -1   15.73    1.16
   9  11  -1   11.43    0.82
  -9  11   1   12.69    1.12
  -9  11   1   15.06    1.23
  -9  11   1   12.73    0.83
   9  11  -1   12.83    0.85
  -9  11   1   13.21    1.36
  -9  11   1   13.78    1.01
  -9  11   1   14.07    1.28
  -9  11   1   11.06    1.07
  -9  11   1   12.33    0.96
  -9  11   1   13.70    0.87
   7 -11  -1   13.49    2.61
   7 -11  -1   19.16    1.20
   7 -11  -1   18.64    1.26
  -7 -11   1   17.52    1.18
  -7 -11   1   16.88    1.33
   7 -11  -1   15.64    2.36
   7 -11  -1   17.76    1.20
   7 -11  -1   16.78    1.25
   7 -11  -1   19.76    1.19
  -7 -11   1   19.02    1.32
   7 -11  -1   18.57    1.28
  -7  11   1   13.46    2.59
  -7  11   1   17.37    1.20
  -7  11   1   16.04    1.17
  -7  11   1   15.50    1.04
  -7  11   1   18.28    1.31
  -7  11   1   11.21    2.79
  -7  11   1   16.10    1.14
  -7  11   1   16.16    1.23
  -7  11   1   16.87    1.07
   5 -11  -1   15.81    1.01
   5 -11  -1   16.48    2.32
   5 -11  -1   14.30    1.00
  -5 -11   1   14.12    0.98
   5 -11  -1   15.26    1.98
  -5 -11   1   16.09    1.08
   5 -11  -1   11.95    2.22
   5 -11  -1   14.65    0.97
  -5 -11   1   14.16    1.08
   5 -11  -1   13.73    0.97
  -5  11   1   14.03    1.02
  -5  11   1   12.74    0.92
  -5  11   1   12.87    2.29
  -5  11   1   11.75    0.83
  -5  11   1   11.34    2.08
  -5  11   1   12.18    0.89
  -5  11   1   13.59    1.04
  -3 -11   1   34.64    2.09
   3 -11  -1   24.86    4.02
   3 -11  -1   28.18    2.00
  -3 -11   1   34.56    2.08
   3 -11  -1   27.49    2.98
  -3 -11   1   32.66    2.03
   3 -11  -1   31.28    2.05
  -3  11   1   25.07    1.64
  -3  11   1   26.05    1.72
   3  11  -1   24.66    1.62
  -3  11   1   26.38    1.80
  -3  11   1   23.65    1.70
  -3  11   1   24.69    1.60
   3  11  -1   25.80    1.60
  -3  11   1   27.06    1.67
  -3  11   1   24.82    3.34
  -3  11   1   18.91    3.54
  -1 -11   1   66.46    4.69
  -1 -11   1   67.24    4.24
   1 -11  -1   65.08    4.19
   1 -11  -1   72.65    4.22
   1 -11  -1   67.89    4.97
  -1 -11   1   64.75    4.22
   1 -11  -1   64.74    4.22
  -1 -11   1   62.37    4.76
   1 -11  -1   66.87    4.83
  -1 -11   1   66.43    4.25
   1 -11  -1   69.53    4.24
   1 -11  -1   68.95    5.33
   1 -11  -1   60.20    5.39
  -1  11   1   52.04    3.60
  -1  11   1   56.63    3.59
   1  11  -1   57.76    3.61
   1  11  -1   56.75    3.62
   1  11  -1   61.17    3.65
  -1  11   1   57.41    3.64
  -1  11   1   55.61    3.56
   1  11  -1   55.68    4.14
  -1  11   1   49.16    4.34
   1  11  -1   54.84    3.58
  -1  11   1   63.52    3.63
  -1  11   1   59.40    4.52
  -1 -11  -1    6.98    0.56
   1 -11   1    7.95    1.62
   1 -11   1    5.37    1.27
  -1 -11  -1    7.33    0.53
  -1 -11  -1    6.74    0.52
   1 -11   1    6.68    0.52
   1 -11   1    6.38    0.56
   1 -11   1    7.63    1.33
  -1  11  -1    6.24    0.54
   1  11   1    7.67    0.48
  -1  11  -1    7.35    1.25
  -1  11  -1    6.06    0.46
  -1  11  -1    6.61    0.57
  -1  11  -1    5.04    1.52
   1  11   1    7.40    0.46
   1  11   1    6.70    0.47
  -1  11  -1    6.46    0.61
   1  11   1    7.74    0.51
   3 -11   1    3.16    1.33
   3 -11   1    3.71    0.34
  -3 -11  -1    3.58    0.42
   3 -11   1    3.71    0.34
   3 -11   1    3.05    1.16
   3 -11   1    3.63    0.32
   3 -11   1    0.04    1.54
   3 -11   1    3.45    0.27
   3 -11   1    3.29    0.27
  -3 -11  -1    3.26    0.39
  -3 -11  -1    3.76    0.34
   3 -11   1    3.26    0.47
  -3  11  -1    3.30    0.38
  -3  11  -1    2.96    0.32
   3  11   1    2.60    0.26
  -3  11  -1    2.82    0.25
  -3  11  -1    2.80    1.09
  -3  11  -1    2.50    1.21
  -3  11  -1    3.09    0.38
  -3  11  -1    3.47    0.40
  -3  11  -1    3.47    0.49
   5 -11   1   41.11    3.01
   5 -11   1   52.30    3.01
  -5 -11  -1   47.11    3.09
   5 -11   1   48.12    3.00
   5 -11   1   45.68    2.98
   5 -11   1   41.57    4.53
   5 -11   1   44.65    4.53
  -5 -11  -1   48.52    3.07
   5 -11   1   49.01    3.20
   5 -11   1   45.45    2.98
  -5 -11  -1   46.70    2.99
   5 -11   1   46.38    2.99
  -5  11  -1   40.85    2.82
  -5  11  -1   42.14    2.68
  -5  11  -1   41.51    2.66
  -5  11  -1   45.06    4.35
  -5  11  -1   42.28    2.79
  -5  11  -1   41.75    2.88
  -5  11  -1   41.59    2.78
  -5  11  -1   45.36    2.75
   7 -11   1    9.55    0.79
   7 -11   1    9.51    0.71
   7 -11   1    9.92    0.78
  -7 -11  -1   11.09    0.93
  -7 -11  -1    9.25    0.86
   7 -11   1   11.25    0.72
  -7 -11  -1    9.99    0.70
   7 -11   1    9.80    0.98
   7 -11   1   10.13    0.69
   7 -11   1    9.26    0.80
   7  11   1    9.04    0.58
  -7  11  -1    8.12    0.91
  -7  11  -1    8.45    0.73
  -7  11  -1    8.39    0.79
  -7  11  -1    9.14    0.79
  -7  11  -1    9.26    0.72
  -7  11  -1    8.81    0.58
  -7  11  -1    9.08    0.61
  -7  11  -1    3.16    5.68
   9 -11   1    4.16    0.57
  -9 -11  -1    4.79    0.73
  -9 -11  -1    3.93    0.67
   9 -11   1    5.38    0.46
   9 -11   1    4.91    0.46
  -9 -11  -1    4.43    0.42
   9 -11   1    5.05    0.41
   9 -11   1    4.41    0.49
  -9 -11  -1    5.24    0.49
   9 -11   1    5.12    0.55
   9 -11   1    4.58    0.40
   9  11   1    3.99    0.32
  -9  11  -1    3.70    0.74
  -9  11  -1    4.93    0.54
  -9  11  -1    4.58    0.64
  -9  11  -1    5.29    0.39
  -9  11  -1    4.62    0.32
  -9  11  -1    3.87    0.57
  -9  11  -1    4.65    0.53
   9  11   1    4.52    0.41
  11 -11   1    4.15    0.64
  11 -11   1    4.82    0.45
  11 -11   1    5.28    0.44
 -11 -11  -1    4.62    0.51
  11 -11   1    3.69    0.63
  11 -11   1    4.91    0.49
 -11  11  -1    6.00    0.70
 -11  11  -1    5.42    0.52
  11  11   1    5.26    0.36
 -11  11  -1    4.04    0.61
 -11  11  -1    4.18    0.34
  11  11   1    4.62    0.39
 -11  11  -1    3.21    0.95
 -11  11  -1    4.01    0.59
  13 -11   1    0.85    0.40
  13  11   1    1.44    0.23
  13  11   1    1.96    0.20
 -13  11  -1    1.00    0.65
 -13  11  -1    1.07    0.36
 -13  11  -1    1.70    0.29
 -13  11  -1    1.24    0.60
 -13  11  -1    1.71    0.20
  13  11   1    1.65    0.22
  15 -11   1    0.35    0.40
 -15 -11  -1    1.03    0.23
  15 -11   1    1.19    0.30
 -15 -11  -1    1.46    0.42
  15 -11   1    0.76    0.25
  15 -11   1    0.85    0.42
  15  11   1    1.07    0.28
 -15  11  -1    1.39    0.87
  15  11   1    1.52    0.16
  15  11   1    0.85    0.27
  15  11   1    0.98    0.25
  15  11   1    1.27    0.20
 -15  11  -1    0.42    0.41
 -15  11  -1    0.39    0.82
 -17 -11  -1   -0.02    0.23
  17 -11   1   -0.01    0.41
  17 -11   1    0.08    0.27
  17 -11   1    0.08    0.22
  17 -11   1    0.34    0.38
  17 -11   1    0.33    0.20
  17  11   1    0.20    0.25
  17  11   1    0.30    0.19
  17  11   1    0.06    0.12
  17  11   1    0.98    0.75
  19 -11   1    0.29    0.22
 -19 -11  -1    0.03    0.30
  19 -11   1    0.05    0.28
  19 -11   1    0.21    0.62
  19  11   1    0.06    0.12
  19  11   1   -0.21    0.26
  19  11   1    0.10    0.44
  18 -12  -1   -0.03    0.60
  18 -12  -1    0.26    0.29
  18 -12  -1   -0.16    0.25
 -18 -12   1    0.09    0.29
  18 -12  -1    0.39    0.22
  18  12  -1   -0.30    0.38
  18  12  -1    0.12    0.18
  18  12  -1   -0.02    0.12
  18  12  -1    0.26    0.31
  16 -12  -1    2.99    0.36
  16 -12  -1    2.58    0.36
  16 -12  -1    1.76    0.51
  16 -12  -1    3.29    0.41
  16 -12  -1    2.64    0.37
  16  12  -1    2.02    0.32
  16  12  -1    2.21    0.28
 -14 -12   1    5.37    0.71
  14 -12  -1    4.07    0.60
 -14 -12   1    4.31    0.42
  14 -12  -1   -6.76    6.02
  14 -12  -1    4.26    0.48
  14 -12  -1    4.79    0.53
 -14 -12   1    4.91    0.55
  14 -12  -1    3.69    0.64
  14 -12  -1    5.40    0.44
  14  12  -1    4.38    0.42
  14  12  -1    4.96    0.48
 -14  12   1    3.19    0.58
 -14  12   1    5.24    0.58
 -14  12   1    3.30    0.73
  14  12  -1    4.80    0.38
  14  12  -1    4.91    0.33
 -12 -12   1    0.22    0.49
 -12 -12   1    0.16    0.18
 -12 -12   1    0.33    0.43
 -12 -12   1    0.37    0.23
  12 -12  -1    0.54    0.22
  12 -12  -1    0.27    0.26
  12 -12  -1    0.04    2.75
  12 -12  -1    0.23    0.29
  12 -12  -1    0.08    0.20
 -12 -12   1    0.57    0.41
  12 -12  -1    0.34    0.17
  12 -12  -1    0.37    0.34
  12  12  -1    0.32    0.15
 -12  12   1    0.22    0.31
 -12  12   1    0.30    0.20
 -12  12   1    0.44    0.25
 -12  12   1    0.50    0.32
 -12  12   1    0.37    0.32
 -12  12   1    0.27    0.51
 -12  12   1    0.23    0.39
  12  12  -1    0.40    0.12
 -12  12   1    0.21    0.10
  10 -12  -1   12.88    1.13
  10 -12  -1   14.91    0.99
  10 -12  -1   15.26    1.08
 -10 -12   1   15.76    1.29
  10 -12  -1   15.36    1.03
  10 -12  -1   13.10    1.10
 -10 -12   1   13.58    1.23
 -10 -12   1   15.43    1.08
  10 -12  -1   15.84    1.05
  10 -12  -1   10.13    2.72
  10 -12  -1   15.90    1.03
 -10 -12   1   15.23    1.13
 -10  12   1   12.89    0.99
  10  12  -1   13.30    0.85
 -10  12   1   12.80    0.83
 -10  12   1   12.55    1.22
 -10  12   1   12.14    1.07
  10  12  -1   12.58    0.82
 -10  12   1   12.96    1.08
 -10  12   1   12.27    1.02
   8 -12  -1   32.66    2.05
  -8 -12   1   31.88    2.20
  -8 -12   1   34.13    2.11
   8 -12  -1   33.00    2.08
   8 -12  -1   31.56    2.10
   8 -12  -1   28.07    2.11
   8 -12  -1   31.47    2.12
   8 -12  -1   32.92    4.50
   8 -12  -1   31.94    2.06
  -8 -12   1   32.24    2.29
  -8  12   1   27.86    2.06
  -8  12   1   28.26    1.82
  -8  12   1   25.59    1.91
  -8  12   1   24.92    1.75
  -8  12   1   28.82    1.73
  -8  12   1   26.20    1.85
   6 -12  -1    5.80    1.60
  -6 -12   1    7.61    0.58
  -6 -12   1    7.92    0.73
   6 -12  -1    8.65    0.62
   6 -12  -1    8.38    0.58
  -6 -12   1    8.31    0.80
   6 -12  -1    7.83    2.03
   6 -12  -1    7.99    0.59
   6 -12  -1    9.06    0.63
   6 -12  -1    7.73    0.58
   6 -12  -1    7.46    1.81
  -6  12   1    5.11    1.83
  -6  12   1    8.77    2.31
  -6  12   1    8.18    0.76
  -6  12   1    7.85    0.66
  -6  12   1    7.62    0.50
  -6  12   1    7.08    0.69
  -6  12   1    7.46    0.65
  -6  12   1    7.52    0.53
   4 -12  -1   40.75    2.45
   4 -12  -1   35.90    3.70
  -4 -12   1   34.45    2.49
   4 -12  -1   35.13    2.43
  -4 -12   1   38.66    2.42
   4 -12  -1   39.19    3.88
  -4 -12   1   39.71    2.48
  -4  12   1   36.99    2.30
  -4  12   1   29.97    2.12
  -4  12   1   35.25    2.22
  -4  12   1   35.14    2.27
  -4  12   1   33.29    2.19
  -4  12   1   33.16    2.14
  -4  12   1   32.78    3.53
  -4  12   1   33.59    2.23
  -4  12   1   33.29    3.66
  -2 -12   1  121.44    7.34
   2 -12  -1  119.00    8.39
   2 -12  -1  114.26    7.32
   2 -12  -1  113.56    7.31
   2 -12  -1  103.38    7.33
   2 -12  -1  118.21    7.35
  -2 -12   1  123.86    7.37
   2 -12  -1  114.68    8.38
   2 -12  -1  106.38    8.53
   2 -12  -1  121.55    8.19
  -2 -12   1  122.34    7.39
   2  12  -1   99.30    6.26
  -2  12   1  105.73    6.31
   2  12  -1   99.92    6.29
  -2  12   1   96.77    7.47
   2  12  -1  100.17    6.33
  -2  12   1  103.74    6.36
  -2  12   1   94.93    6.25
  -2  12   1   94.45    7.37
  -2  12   1  100.65    6.29
   0 -12   1    7.08    1.03
   0 -12  -1    8.91    0.61
   0 -12  -1    7.75    0.62
   0 -12   1    6.93    1.25
   0 -12  -1    9.15    1.25
   0 -12   1    8.63    0.63
   0 -12   1    8.64    0.62
   0 -12  -1    8.76    0.63
   0 -12   1    8.06    0.61
   0 -12  -1    6.61    1.14
   0 -12   1    7.12    1.26
   0  12  -1    6.40    0.57
   0  12   1    5.36    0.41
   0  12  -1    5.13    0.43
   0  12   1    5.11    0.53
   0  12   1    6.53    0.43
   0  12   1    5.67    1.18
   0  12   1    4.06    0.97
   0  12   1    6.18    0.42
   0  12  -1    4.10    1.22
   0  12  -1    6.58    0.49
   0  12  -1    6.25    0.51
   0  12  -1    5.63    0.39
   0  12  -1    6.73    1.13
  -2 -12  -1   95.56    5.79
   2 -12   1   97.45    5.76
  -2 -12  -1   93.22    5.76
   2 -12   1   84.77    7.37
   2 -12   1   88.81    5.76
  -2 -12  -1   92.27    5.81
   2 -12   1   82.26    5.71
  -2  12  -1   86.95    6.49
   2  12   1   73.51    5.20
   2  12   1   76.02    5.18
   2  12   1   80.11    5.16
  -2  12  -1   85.68    5.31
  -2  12  -1   85.17    5.24
  -2  12  -1   90.17    5.22
   2  12   1   84.32    5.20
   2  12   1   79.10    5.16
   2  12   1   85.58    5.17
  -2  12  -1   81.86    5.27
  -2  12  -1   79.34    5.16
  -2  12  -1   83.59    5.35
  -4 -12  -1   31.19    2.07
  -4 -12  -1   33.36    1.99
  -4 -12  -1   31.53    2.05
   4 -12   1   28.93    1.97
   4 -12   1   26.63    2.13
   4 -12   1   32.13    2.00
   4 -12   1   29.33    1.94
   4 -12   1   30.31    1.95
  -4  12  -1   26.08    3.07
  -4  12  -1   26.22    1.79
  -4  12  -1   25.99    1.71
  -4  12  -1   26.99    1.76
  -4  12  -1   26.99    1.85
  -4  12  -1   25.34    1.64
  -4  12  -1   23.18    1.62
   6 -12   1   12.33    0.82
   6 -12   1   11.59    0.87
   6 -12   1   11.02    0.78
   6 -12   1   13.17    0.84
   6 -12   1   10.27    0.77
  -6 -12  -1   10.77    0.80
  -6 -12  -1   10.30    0.96
   6 -12   1   12.00    0.83
  -6  12  -1   11.71    0.84
  -6  12  -1   11.08    0.75
  -6  12  -1   10.81    0.87
  -6  12  -1    9.97    1.01
  -6  12  -1   10.29    0.90
  -6  12  -1   11.70    0.72
  -6  12  -1   11.05    0.93
   8 -12   1    1.31    0.31
  -8 -12  -1    1.59    0.45
   8 -12   1    1.69    0.24
   8 -12   1    1.02    0.18
  -8 -12  -1    1.22    0.42
  -8 -12  -1    1.17    0.24
   8 -12   1    1.07    0.19
   8 -12   1    1.16    0.27
   8 -12   1    0.85    0.26
  -8 -12  -1    1.34    0.20
  -8  12  -1    0.85    0.28
  -8  12  -1    1.26    0.40
  -8  12  -1    0.85    0.31
   8  12   1    1.30    0.15
  -8  12  -1    1.37    0.15
  -8  12  -1    0.81    0.27
  -8  12  -1    1.01    0.48
 -10 -12  -1    2.88    0.30
  10 -12   1    3.19    0.49
  10 -12   1    2.83    0.51
 -10 -12  -1    3.90    0.45
  10 -12   1    3.75    0.39
  10 -12   1    2.61    2.56
 -10 -12  -1    2.42    0.58
  10 -12   1    3.73    0.46
 -10 -12  -1    2.95    0.61
  10 -12   1    4.51    0.42
  10  12   1    3.70    0.30
 -10  12  -1    2.93    0.49
  10  12   1    3.22    0.27
 -10  12  -1    3.12    0.26
 -10  12  -1    4.20    0.57
 -10  12  -1    3.07    0.57
 -10  12  -1    3.93    0.36
 -10  12  -1    2.00    0.60
 -12 -12  -1    0.34    0.26
  12 -12   1    0.73    0.24
  12 -12   1    0.60    0.22
  12 -12   1    0.59    0.30
 -12 -12  -1    0.47    0.51
  12 -12   1    1.88    3.80
  12 -12   1    0.81    0.29
  12 -12   1    0.78    0.20
  12  12   1    0.73    0.14
  12  12   1    0.61    0.09
 -12  12  -1    1.02    0.21
 -12  12  -1    1.06    0.24
 -12  12  -1    0.01    0.33
 -12  12  -1    0.41    0.11
 -12  12  -1    1.00    1.02
 -12  12  -1    0.66    0.34
 -12  12  -1    0.44    0.35
  14 -12   1    0.57    0.34
  14 -12   1    0.39    0.36
  14 -12   1   -1.64    6.05
  14 -12   1    0.68    0.25
  14 -12   1    0.83    0.29
 -14 -12  -1    1.41    0.35
  14  12   1    1.33    0.20
 -14  12  -1    1.13    0.38
 -14  12  -1    0.43    0.76
 -14  12  -1    1.60    0.72
  14  12   1    0.96    0.22
  14  12   1    1.54    0.15
  16 -12   1    1.04    0.29
  16 -12   1    1.55    0.41
  16 -12   1    0.45    0.41
  16 -12   1    0.93    0.20
  16 -12   1    0.55    0.24
  16  12   1    0.53    0.12
 -16  12  -1    0.55    0.40
  16  12   1    0.89    0.26
  16  12   1    0.80    0.17
  16  12   1    0.82    0.30
  18 -12   1    0.05    0.29
  18 -12   1    0.61    0.22
  18 -12   1    0.53    0.53
  18  12   1    0.90    0.43
  18  12   1    0.33    0.31
  18  12   1   -0.03    0.45
  18  12   1    0.17    0.14
  19 -13  -1    0.73    0.22
  19 -13  -1    1.32    0.55
  19 -13  -1    0.02    0.30
 -19 -13   1    0.41    0.35
  19  13  -1    1.06    0.60
  19  13  -1    0.76    0.14
  17 -13  -1    0.23    0.19
  17 -13  -1    0.48    0.45
 -17 -13   1   -0.22    0.27
  17 -13  -1   -0.01    0.23
  17 -13  -1    0.14    0.28
  17 -13  -1    0.02    0.41
  17  13  -1   -0.29    0.32
  17  13  -1    0.12    0.11
  17  13  -1   -0.04    0.15
  17  13  -1    0.32    0.30
 -17  13   1   -0.09    0.38
  15 -13  -1    0.72    0.37
  15 -13  -1   -0.48    7.02
  15 -13  -1    1.20    0.26
 -15 -13   1    0.34    0.28
  15 -13  -1    1.27    0.30
  15 -13  -1    1.08    0.29
 -15 -13   1    0.09    0.67
 -15 -13   1    0.71    0.18
 -15  13   1    0.19    0.41
  15  13  -1    0.58    0.20
  15  13  -1    1.02    0.12
 -15  13   1    0.73    0.39
  15  13  -1    1.03    0.17
 -15  13   1    0.66    0.26
 -15  13   1    2.17    0.76
 -15  13   1    1.01    0.70
  15  13  -1    0.79    0.25
  13 -13  -1    0.42    0.23
 -13 -13   1    0.04    0.43
  13 -13  -1   -0.12    0.27
  13 -13  -1    0.40    0.23
 -13 -13   1    0.14    0.26
  13 -13  -1   -6.21    3.34
 -13 -13   1    0.52    0.58
  13 -13  -1    0.03    0.27
 -13 -13   1    0.41    0.19
  13 -13  -1    0.47    0.26
 -13 -13   1   -0.18    0.48
 -13  13   1   -0.06    0.09
  13  13  -1    0.30    0.15
  13  13  -1    0.06    0.19
 -13  13   1    0.14    0.48
 -13  13   1    0.31    0.20
 -13  13   1   -0.28    0.48
  13  13  -1    0.13    0.12
 -13  13   1    0.11    0.29
 -13  13   1    0.14    0.33
 -13  13   1    0.23    0.48
  11 -13  -1    2.15    0.31
 -11 -13   1    1.40    0.23
  11 -13  -1    1.34    0.34
  11 -13  -1   -0.61    2.40
 -11 -13   1    1.36    0.33
 -11 -13   1    2.10    0.61
  11 -13  -1    1.94    0.27
 -11 -13   1    2.18    0.45
 -11 -13   1    0.74    0.60
  11 -13  -1    2.06    0.24
  11 -13  -1    1.72    0.37
 -11  13   1    2.00    0.40
 -11  13   1    2.23    0.32
 -11  13   1    1.68    0.44
  11  13  -1    1.97    0.25
 -11  13   1    1.73    0.20
 -11  13   1    1.55    0.56
 -11  13   1    1.62    0.49
 -11  13   1    1.57    0.41
  11  13  -1    1.64    0.23
 -11  13   1    1.86    0.25
  -9 -13   1    0.86    0.25
   9 -13  -1    1.10    0.17
  -9 -13   1    1.43    0.40
  -9 -13   1    0.75    0.19
   9 -13  -1    1.30    0.25
  -9 -13   1    1.07    0.43
   9 -13  -1    0.84    0.20
   9 -13  -1    1.12    0.34
   9 -13  -1    0.88    0.25
   9 -13  -1   -0.82    1.57
  -9 -13   1    0.88    0.42
  -9 -13   1    0.52    0.23
   9 -13  -1    1.30    0.28
   9 -13  -1    1.34    0.24
   9 -13  -1    1.16    0.21
  -9  13   1    0.91    0.34
  -9  13   1    1.22    0.47
  -9  13   1    0.79    0.25
  -9  13   1    0.85    0.34
  -9  13   1    0.96    0.12
  -9  13   1    1.28    0.22
  -9  13   1    1.33    0.26
  -9  13   1    1.12    0.33
  -7 -13   1    8.03    0.78
  -7 -13   1    7.80    0.75
   7 -13  -1    8.99    0.59
   7 -13  -1    8.07    0.68
  -7 -13   1    7.03    0.58
   7 -13  -1    5.12    1.59
   7 -13  -1    8.68    0.62
  -7 -13   1    7.89    0.66
  -7 -13   1    7.62    0.72
   7 -13  -1    8.47    0.63
   7 -13  -1    8.84    0.63
  -7  13   1    7.86    0.59
  -7  13   1    7.41    0.68
  -7  13   1    7.31    0.74
  -7  13   1    8.77    0.56
  -7  13   1    7.10    0.64
  -5 -13   1   13.48    0.93
   5 -13  -1   12.83    2.20
  -5 -13   1   13.99    1.02
   5 -13  -1   12.93    0.95
   5 -13  -1   13.48    0.96
   5 -13  -1   12.61    0.90
   5 -13  -1   15.88    2.48
  -5 -13   1   14.72    1.06
  -5  13   1   10.90    0.71
  -5  13   1   10.72    0.85
  -5  13   1   10.76    0.89
  -5  13   1   10.82    0.73
  -5  13   1   11.40    0.85
  -5  13   1   11.31    0.94
   3 -13  -1   69.89    5.48
  -3 -13   1   62.63    4.10
   3 -13  -1   54.98    4.98
   3 -13  -1   62.65    6.02
   3 -13  -1   63.20    5.39
  -3 -13   1   68.30    4.15
   3 -13  -1   67.62    4.08
   3 -13  -1   63.95    4.11
  -3 -13   1   64.56    4.16
  -3  13   1   54.52    3.39
  -3  13   1   56.66    3.37
   3  13  -1   54.36    3.29
  -3  13   1   49.19    4.64
  -3  13   1   48.31    3.27
  -3  13   1   55.22    3.43
  -3  13   1   49.34    4.76
   3  13  -1   46.72    3.31
  -3  13   1   52.71    3.29
   1 -13  -1   43.64    3.46
  -1 -13   1   44.28    2.96
  -1 -13   1   39.51    2.61
  -1 -13   1   42.04    2.63
   1 -13  -1   39.67    3.67
   1 -13  -1   37.40    2.57
   1 -13  -1   42.26    2.60
   1 -13  -1   35.83    3.25
   1 -13  -1   37.35    3.43
   1 -13  -1   42.46    2.62
   1 -13  -1   39.91    2.61
  -1 -13   1   40.70    2.64
  -1  13   1   38.10    2.22
  -1  13   1   33.10    2.16
   1  13  -1   32.83    2.19
   1  13  -1   32.22    2.15
  -1  13   1   35.75    2.27
   1  13  -1   33.96    2.22
   1  13  -1   33.23    2.27
  -1  13   1   36.88    2.20
  -1  13   1   30.51    3.15
   1 -13   1   43.75    3.15
   1 -13   1   52.33    3.93
   1 -13   1   41.86    4.38
  -1 -13  -1   49.83    3.21
   1 -13   1   54.46    3.19
   1 -13   1   49.42    3.17
   1 -13   1   47.89    3.18
   1 -13   1   50.90    4.24
  -1 -13  -1   52.46    3.18
   1 -13   1   49.52    3.52
  -1  13  -1   44.27    2.93
  -1  13  -1   44.60    2.83
  -1  13  -1   45.26    3.87
  -1  13  -1   44.35    2.90
   1  13   1   47.20    2.85
   1  13   1   42.92    2.79
  -1  13  -1   42.34    2.78
   1  13   1   46.43    2.81
  -1  13  -1   43.36    2.86
   1  13   1   40.85    2.79
   3 -13   1   44.53    5.72
  -3 -13  -1   51.87    3.20
   3 -13   1   53.55    3.19
  -3 -13  -1   49.30    3.23
   3 -13   1   49.09    3.18
  -3 -13  -1   50.77    3.26
   3 -13   1   40.86    4.55
   3 -13   1   46.18    3.14
   3 -13   1   52.91    3.20
  -3  13  -1   49.37    2.90
  -3  13  -1   42.86    2.82
  -3  13  -1   45.46    2.94
  -3  13  -1   43.11    2.94
  -3  13  -1   43.70    3.01
  -3  13  -1   45.05    2.98
  -3  13  -1   44.11    2.83
  -3  13  -1   45.45    4.29
   5 -13   1    5.04    1.90
   5 -13   1    5.62    0.46
  -5 -13  -1    5.19    0.45
   5 -13   1    4.61    0.43
   5 -13   1    5.44    0.45
  -5 -13  -1    5.56    0.62
   5 -13   1    4.88    0.48
  -5 -13  -1    4.72    0.58
   5 -13   1    5.57    0.40
  -5  13  -1    4.65    0.33
  -5  13  -1    4.94    0.67
  -5  13  -1    4.96    0.47
  -5  13  -1    4.99    0.37
  -5  13  -1    4.91    0.55
  -5  13  -1    1.97    1.64
  -5  13  -1    5.10    0.52
  -5  13  -1    4.93    0.57
  -5  13  -1    4.95    1.85
  -7 -13  -1   13.84    0.95
   7 -13   1   14.23    0.94
   7 -13   1   15.40    0.97
   7 -13   1   14.16    0.92
  -7 -13  -1   12.78    1.11
   7 -13   1   13.38    0.98
  -7 -13  -1   12.19    0.90
   7 -13   1   14.34    0.98
  -7 -13  -1   12.27    1.20
   7 -13   1   13.38    0.94
   7 -13   1   14.23    1.00
  -7  13  -1   13.17    0.77
  -7  13  -1   11.10    0.94
  -7  13  -1   10.66    0.96
  -7  13  -1   10.08    1.11
  -7  13  -1   11.13    0.86
  -7  13  -1   12.24    1.01
  -7  13  -1   12.26    0.81
  -7  13  -1   13.11    1.06
   9 -13   1    4.33    0.54
   9 -13   1    4.27    0.52
  -9 -13  -1    5.77    0.45
   9 -13   1    5.03    2.34
   9 -13   1    4.75    0.44
   9 -13   1    5.32    0.48
  -9 -13  -1    5.95    0.83
  -9 -13  -1    4.03    0.70
   9 -13   1    5.61    0.49
   9 -13   1    5.59    0.43
  -9 -13  -1    4.43    0.50
  -9 -13  -1    4.93    0.39
  -9  13  -1    3.67    0.60
  -9  13  -1    4.24    0.30
  -9  13  -1    4.16    0.56
  -9  13  -1    4.62    0.55
   9  13   1    4.22    0.32
  -9  13  -1    2.97    0.55
   9  13   1    4.13    0.30
  11 -13   1    0.66    2.95
  11 -13   1    1.56    0.26
  11 -13   1    1.72    0.31
 -11 -13  -1    1.10    0.18
  11 -13   1    1.12    0.33
  11 -13   1    1.03    0.31
 -11 -13  -1    1.06    0.54
 -11  13  -1    1.90    0.19
 -11  13  -1    1.25    0.43
 -11  13  -1    1.36    0.66
  11  13   1    1.90    0.22
 -11  13  -1    1.65    0.45
 -11  13  -1    2.02    0.29
 -11  13  -1    1.65    0.26
  11  13   1    1.75    0.18
 -11  13  -1    1.06    0.38
 -11  13  -1    2.09    0.58
  13 -13   1    3.19    0.49
  13 -13   1   -9.91    5.50
  13 -13   1    2.13    0.43
 -13  13  -1    2.38    0.46
  13  13   1    3.17    0.34
 -13  13  -1    2.86    0.26
 -13  13  -1    3.18    0.73
  13  13   1    3.68    0.25
  13  13   1    4.41    0.47
  15 -13   1    1.54    0.28
  15 -13   1    1.48    0.44
 -15 -13  -1    1.50    0.24
 -15 -13  -1    1.74    0.35
 -15  13  -1    1.04    0.49
  15  13   1    1.84    0.22
  15  13   1    1.43    0.29
  15  13   1    2.24    0.19
  17 -13   1    1.43    0.40
  17 -13   1    0.84    0.36
  17  13   1    0.51    0.40
  17  13   1    0.75    0.43
  17  13   1    0.86    0.48
  17  13   1    0.76    0.19
  17  13   1    0.95    0.17
  18 -14  -1    0.16    0.20
 -18 -14   1    0.32    0.36
  18 -14  -1    0.19    0.32
  18 -14  -1   -0.35    0.28
  18  14  -1    0.14    0.12
  16 -14  -1    0.71    0.38
 -16 -14   1    0.16    0.28
  16 -14  -1    0.27    0.27
  16 -14  -1    0.08    0.24
  16 -14  -1    0.40    0.17
  16 -14  -1   -0.12    0.35
  16  14  -1    0.29    0.10
  16  14  -1    0.76    0.24
 -16  14   1    0.01    0.40
  14 -14  -1    1.48    0.29
  14 -14  -1    3.78    4.88
  14 -14  -1    1.62    0.33
 -14 -14   1    0.97    0.34
 -14 -14   1    0.99    0.83
  14 -14  -1    1.51    0.30
 -14 -14   1    1.46    0.30
 -14 -14   1    0.36    0.63
  14 -14  -1    1.87    0.26
  14 -14  -1    0.84    0.34
 -14  14   1    0.99    0.43
 -14  14   1    1.05    0.14
 -14  14   1    1.55    0.39
 -14  14   1    0.63    0.46
  14  14  -1    1.49    0.18
 -14  14   1    0.13    0.65
 -14  14   1    1.08    0.66
  14  14  -1    1.28    0.15
  14  14  -1    1.11    0.26
  12 -14  -1    4.41    0.50
  12 -14  -1    3.35    0.49
 -12 -14   1    3.41    0.66
  12 -14  -1    3.77    0.61
  12 -14  -1    4.09    0.39
 -12 -14   1    3.18    0.49
 -12 -14   1    2.56    0.68
 -12 -14   1    2.61    0.69
 -12 -14   1    3.54    0.39
  12 -14  -1    4.85    0.53
  12 -14  -1    3.65    0.43
  12 -14  -1    0.21    2.82
  12  14  -1    3.33    0.27
 -12  14   1    2.11    0.49
 -12  14   1    3.75    0.37
 -12  14   1    2.64    0.25
 -12  14   1    2.15    0.72
 -12  14   1    2.41    0.45
 -12  14   1    2.76    0.60
 -12  14   1    3.07    0.65
  12  14  -1    3.43    0.37
  12  14  -1    2.70    0.36
  10 -14  -1    7.96    0.64
 -10 -14   1    7.46    0.71
 -10 -14   1    9.62    1.00
 -10 -14   1    7.34    0.88
 -10 -14   1    9.19    0.82
  10 -14  -1    6.72    0.68
  10 -14  -1    8.94    0.68
  10 -14  -1    8.44    0.72
  10 -14  -1    3.03    2.39
 -10 -14   1    8.01    0.62
  10 -14  -1    9.14    0.61
 -10  14   1    5.77    0.73
  10  14  -1    5.95    0.42
 -10  14   1    7.08    0.78
 -10  14   1    6.40    0.69
 -10  14   1    6.52    0.92
 -10  14   1    6.26    0.44
 -10  14   1    6.73    0.65
   8 -14  -1    5.01    0.46
   8 -14  -1    5.24    0.44
  -8 -14   1    5.21    0.60
   8 -14  -1    6.05    0.58
   8 -14  -1    5.46    0.48
  -8 -14   1    4.55    0.66
  -8 -14   1    5.19    0.70
   8 -14  -1    5.30    0.42
  -8 -14   1    4.55    0.47
   8 -14  -1    5.02    0.48
   8 -14  -1    5.61    0.45
  -8  14   1    4.37    0.61
  -8  14   1    4.23    0.56
  -8  14   1    4.49    0.72
  -8  14   1    5.42    0.51
  -8  14   1    4.82    0.46
  -8  14   1    4.54    0.41
  -8  14   1    4.68    0.61
  -8  14   1    5.21    0.34
   6 -14  -1   32.23    2.03
  -6 -14   1   30.23    2.00
  -6 -14   1   30.39    2.01
  -6 -14   1   31.17    2.11
  -6 -14   1   27.05    1.97
  -6 -14   1   30.11    2.06
   6 -14  -1   31.43    1.98
  -6 -14   1   31.61    2.15
  -6 -14   1   34.11    2.05
   6 -14  -1   29.84    1.99
   6 -14  -1   32.46    4.04
  -6  14   1   25.34    1.84
  -6  14   1   27.40    1.86
  -6  14   1   26.97    1.72
  -6  14   1   25.97    1.89
  -6  14   1   27.76    1.72
  -4 -14   1   45.54    2.87
   4 -14  -1   48.44    4.46
   4 -14  -1   35.97    3.86
  -4 -14   1   46.80    2.85
   4 -14  -1   34.70    4.18
   4 -14  -1   40.82    2.74
   4 -14  -1   42.21    2.79
  -4 -14   1   45.83    2.89
  -4  14   1   34.21    2.39
  -4  14   1   33.26    2.41
  -4  14   1   38.21    2.37
  -4  14   1   28.37    3.74
  -4  14   1   34.99    2.26
  -4  14   1   38.14    2.33
  -4  14   1   37.01    2.45
  -4  14   1   36.48    2.24
   2 -14  -1    4.46    0.44
  -2 -14   1    5.35    0.46
   2 -14  -1    3.05    1.34
  -2 -14   1    5.15    0.50
   2 -14  -1    5.18    0.39
   2 -14  -1    4.71    0.45
  -2 -14   1    5.23    0.48
   2 -14  -1    4.37    0.99
   2 -14  -1    4.78    1.69
   2  14  -1    3.72    0.43
  -2  14   1    5.58    2.01
  -2  14   1    4.07    0.39
   2  14  -1    3.75    0.36
   2  14  -1    3.23    0.30
  -2  14   1    4.05    0.45
   2  14  -1    3.80    0.26
  -2  14   1    4.33    1.50
  -2  14   1    3.89    0.35
  -2  14   1    3.97    0.29
  -2  14   1    3.20    0.25
   0 -14  -1   15.26    1.44
   0 -14  -1   14.12    1.01
   0 -14  -1   15.44    1.03
   0 -14   1   15.32    1.03
   0 -14   1   16.33    1.73
   0 -14   1   13.99    1.00
   0 -14  -1   14.13    1.00
   0 -14   1   14.13    1.01
   0 -14   1   11.71    1.43
   0  14  -1   11.46    1.56
   0  14   1   13.04    0.91
   0  14  -1   13.55    0.85
   0  14   1   10.99    0.78
   0  14   1   12.99    0.85
   0  14  -1   12.24    0.88
   0  14  -1   10.56    0.91
   0  14  -1   11.79    0.96
   0  14   1   12.68    0.82
   2 -14   1    3.79    0.33
   2 -14   1    3.43    0.35
  -2 -14  -1    2.58    0.38
  -2 -14  -1    3.45    0.43
  -2 -14  -1    3.02    0.35
   2 -14   1    2.36    1.28
   2 -14   1    2.91    0.92
   2 -14   1    3.07    0.33
   2 -14   1    3.10    0.33
   2 -14   1    1.31    1.61
  -2  14  -1    3.04    0.39
   2  14   1    2.65    0.22
  -2  14  -1    2.42    0.47
  -2  14  -1    2.01    1.06
  -2  14  -1    3.21    0.32
   2  14   1    2.62    0.23
  -2  14  -1    2.65    0.20
  -2  14  -1    2.20    0.39
   2  14   1    2.30    0.24
  -2  14  -1    0.75    1.10
  -2  14  -1    2.55    0.23
   2  14   1    2.23    0.30
   4 -14   1    1.29    0.24
  -4 -14  -1    1.36    0.23
   4 -14   1    1.37    0.34
   4 -14   1    1.39    0.24
  -4 -14  -1    1.37    0.24
   4 -14   1    0.89    1.02
   4 -14   1    0.93    0.20
   4 -14   1   -0.15    1.23
  -4 -14  -1    1.92    0.38
  -4 -14  -1    1.64    0.35
  -4 -14  -1    1.22    0.17
  -4  14  -1    0.55    0.25
  -4  14  -1    0.82    0.09
  -4  14  -1    1.07    0.23
  -4  14  -1    0.80    0.37
  -4  14  -1    0.38    0.25
  -4  14  -1    0.80    1.51
  -4  14  -1    0.97    0.15
  -4  14  -1    0.74    1.10
  -4  14  -1    1.13    0.31
  -6 -14  -1    8.86    0.64
   6 -14   1    8.26    0.62
   6 -14   1    7.77    0.60
  -6 -14  -1    8.29    0.90
  -6 -14  -1    7.73    0.74
   6 -14   1    7.91    0.57
   6 -14   1    4.96    1.65
  -6 -14  -1    8.58    0.67
  -6 -14  -1    7.74    0.78
   6 -14   1    8.70    0.59
   6 -14   1    8.26    0.64
  -6  14  -1    8.14    0.55
  -6  14  -1    7.83    0.51
  -6  14  -1    7.19    0.79
  -6  14  -1    7.77    0.66
  -6  14  -1    6.98    0.75
  -6  14  -1    6.58    0.86
  -6  14  -1    8.73    0.78
   8 -14   1   13.81    0.97
   8 -14   1   14.85    0.96
   8 -14   1   13.79    0.99
  -8 -14  -1   13.56    1.05
  -8 -14  -1   13.61    1.24
  -8 -14  -1   12.81    0.91
   8 -14   1   14.12    0.92
  -8 -14  -1   12.25    1.15
   8 -14   1   13.29    0.93
  -8 -14  -1   13.64    0.96
  -8 -14  -1   13.54    0.95
   8 -14   1   14.65    1.02
  -8  14  -1   12.25    1.09
  -8  14  -1   12.39    0.87
  -8  14  -1   12.38    0.83
  -8  14  -1   13.08    0.79
  -8  14  -1   12.39    0.97
  -8  14  -1   10.77    1.18
  -8  14  -1   10.81    1.04
  -8  14  -1   11.73    0.98
 -10 -14  -1    2.54    0.42
  10 -14   1    0.66    2.32
  10 -14   1    2.45    0.33
  10 -14   1    1.88    0.34
 -10 -14  -1    1.77    0.26
 -10 -14  -1    2.18    0.62
  10 -14   1    2.64    0.38
  10 -14   1    2.42    0.31
 -10 -14  -1    2.71    0.49
  10 -14   1    2.45    0.30
 -10 -14  -1    2.37    0.37
 -10  14  -1    1.68    0.26
 -10  14  -1    1.65    0.19
 -10  14  -1    1.51    0.39
  10  14   1    1.98    0.21
 -10  14  -1    1.48    0.65
 -10  14  -1    1.63    0.50
 -10  14  -1    1.75    0.27
 -10  14  -1    1.36    0.44
 -10  14  -1    1.95    0.44
  10  14   1    1.68    0.19
 -12 -14  -1    5.47    0.49
 -12 -14  -1    5.47    0.57
  12 -14   1    5.98    0.57
  12 -14   1    3.80    3.67
  12 -14   1    3.95    0.49
  12 -14   1    4.13    0.54
  12 -14   1    5.38    0.46
 -12  14  -1    2.81    0.85
 -12  14  -1    4.24    0.68
 -12  14  -1    3.92    0.31
  12  14   1    3.99    0.35
  12  14   1    3.89    0.34
 -12  14  -1    3.60    0.75
 -12  14  -1    4.26    0.41
  14 -14   1  -12.23    9.76
  14  14   1    3.13    0.36
  14  14   1    2.56    0.27
  14  14   1    3.28    0.29
 -14  14  -1    2.14    0.32
 -14  14  -1    1.46    0.49
  16 -14   1    0.08    0.35
  16 -14   1   -0.46    0.22
 -16 -14  -1   -0.05    0.32
 -16 -14  -1    0.15    0.20
  16 -14   1   -0.03    0.27
  16 -14   1    0.29    0.18
 -16  14  -1    0.17    0.40
  16  14   1    0.26    0.26
  16  14   1    0.23    0.16
  16  14   1    0.04    0.11
 -18 -14  -1    0.05    0.29
  18 -14   1   -0.09    0.23
  18 -14   1   -0.04    0.44
  18  14   1    0.00    0.69
  18  14   1    0.16    0.12
  17 -15  -1    1.10    0.40
  17 -15  -1    1.75    0.46
  17 -15  -1    0.58    0.32
  17 -15  -1    1.12    0.21
 -17 -15   1    0.79    0.38
  17  15  -1    0.97    0.14
  15 -15  -1    0.84    0.26
  15 -15  -1    1.28    0.32
  15 -15  -1    1.10    0.37
 -15 -15   1    0.94    0.33
 -15 -15   1    0.56    0.21
 -15  15   1    1.25    0.30
  15  15  -1    1.92    0.18
  15  15  -1    1.93    0.25
 -13 -15   1    3.78    0.51
  13 -15  -1    3.61    0.51
 -13 -15   1    3.44    0.41
  13 -15  -1    3.67    0.38
  13 -15  -1    1.11    3.65
 -13 -15   1    4.20    0.64
  13 -15  -1    3.35    0.39
 -13 -15   1    2.16    0.70
 -13  15   1    2.50    0.50
 -13  15   1    2.66    0.23
 -13  15   1    2.61    0.31
 -13  15   1    2.02    0.65
 -13  15   1    2.78    0.65
 -13  15   1    2.41    0.80
 -13  15   1    1.99    0.50
 -11 -15   1    6.01    0.74
  11 -15  -1    6.30    0.71
  11 -15  -1    5.43    0.44
 -11 -15   1    5.53    0.59
  11 -15  -1    0.91    2.35
 -11 -15   1    4.60    0.53
  11 -15  -1    4.21    0.49
 -11 -15   1    4.07    0.74
  11 -15  -1    5.52    0.69
 -11 -15   1    5.16    0.46
  11 -15  -1    6.06    0.53
 -11 -15   1    6.13    0.96
  11 -15  -1    4.79    0.49
 -11  15   1    4.01    0.32
 -11  15   1    4.59    0.42
 -11  15   1    3.12    0.61
 -11  15   1    4.44    0.72
 -11  15   1    3.37    0.59
  11  15  -1    4.59    0.31
 -11  15   1    3.66    0.59
 -11  15   1    3.44    0.82
  -9 -15   1    0.22    0.18
   9 -15  -1    0.20    0.19
   9 -15  -1    0.32    0.18
   9 -15  -1    0.15    0.19
   9 -15  -1    0.01    0.18
   9 -15  -1    0.33    0.38
   9 -15  -1    0.19    0.17
  -9 -15   1    0.16    0.26
   9 -15  -1    0.07    0.15
  -9 -15   1    0.12    0.41
  -9 -15   1    0.19    0.12
  -9 -15   1    0.83    0.49
  -9 -15   1    0.34    0.38
   9 -15  -1    0.06    0.23
   9 -15  -1    0.50    1.87
  -9 -15   1    0.01    0.22
  -9  15   1    0.16    0.28
  -9  15   1    0.29    0.45
  -9  15   1    0.08    0.23
  -9  15   1    0.16    0.34
  -9  15   1    0.19    0.09
  -9  15   1   -0.01    0.29
  -9  15   1    0.10    0.22
  -9  15   1   -0.15    0.16
   7 -15  -1    1.96    1.44
  -7 -15   1    1.75    0.29
  -7 -15   1    1.43    0.22
   7 -15  -1    2.19    0.31
  -7 -15   1    1.83    0.26
   7 -15  -1    1.74    0.24
   7 -15  -1    2.28    0.33
  -7 -15   1    1.78    0.44
  -7 -15   1    1.45    0.24
  -7 -15   1    2.55    0.44
  -7 -15   1    1.96    0.48
  -7 -15   1    2.21    0.33
  -7  15   1    1.84    0.39
  -7  15   1    1.63    0.30
  -7  15   1    1.69    0.17
  -7  15   1    1.54    0.37
  -7  15   1    1.34    0.38
  -7  15   1    1.40    0.20
  -7  15   1    1.60    0.23
  -7  15   1    1.10    0.45
   5 -15  -1   21.12    3.16
   5 -15  -1   21.18    1.41
  -5 -15   1   20.04    1.53
   5 -15  -1   21.54    1.39
  -5 -15   1   20.15    1.40
   5 -15  -1   22.70    1.38
   5 -15  -1   21.17    1.45
   5 -15  -1   19.71    1.37
  -5 -15   1   22.00    1.51
   5 -15  -1   21.42    1.43
  -5 -15   1   18.77    1.37
  -5 -15   1   21.66    1.45
  -5  15   1   19.74    1.48
  -5  15   1   19.40    1.36
  -5  15   1   17.50    1.34
  -5  15   1   17.47    1.38
  -5  15   1   18.65    1.21
  -3 -15   1   18.08    1.18
   3 -15  -1   18.08    1.14
   3 -15  -1   17.37    1.16
  -3 -15   1   19.45    1.19
  -3 -15   1   16.88    1.24
   3 -15  -1   17.11    1.20
   3 -15  -1   15.45    1.14
  -3 -15   1   16.50    1.14
   3 -15  -1   16.84    1.18
  -3 -15   1   19.60    1.28
   3 -15  -1   16.80    2.29
   3 -15  -1   18.24    2.53
   3 -15  -1   13.71    2.54
   3 -15  -1   16.48    1.22
  -3  15   1   14.77    1.02
  -3  15   1   15.02    1.05
   3  15  -1   14.34    0.96
  -3  15   1   15.52    1.16
   3  15  -1   12.87    0.98
  -3  15   1   11.90    2.82
  -3  15   1   15.51    1.15
  -3  15   1   12.19    2.29
   3  15  -1   16.25    0.97
  -3  15   1   14.23    0.95
  -3  15   1   13.58    0.93
   1 -15  -1   38.48    2.55
  -1 -15   1   42.95    2.57
   1 -15  -1   38.58    2.56
  -1 -15   1   40.10    2.61
   1 -15  -1   40.19    2.59
   1 -15  -1   42.17    2.58
   1 -15  -1   38.43    2.53
  -1 -15   1   42.59    2.59
  -1 -15   1   35.49    2.54
  -1 -15   1   38.99    2.59
  -1 -15   1   36.79    2.52
  -1  15   1   29.01    2.10
  -1  15   1   32.62    2.12
   1  15  -1   32.11    2.19
   1  15  -1   34.93    2.13
  -1  15   1   35.52    2.26
   1  15  -1   36.44    2.16
  -1  15   1   37.24    2.20
  -1  15   1   34.64    2.17
   1  15  -1   29.13    2.24
  -1 -15  -1   21.00    1.47
   1 -15   1   22.47    1.54
   1 -15   1   24.83    2.54
  -1 -15  -1   21.59    1.48
  -1 -15  -1   21.78    1.53
  -1 -15  -1   23.12    1.51
   1 -15   1   25.48    1.53
  -1 -15  -1   22.02    1.56
  -1 -15  -1   23.54    1.53
   1 -15   1   22.60    1.53
   1 -15   1   24.63    1.53
   1 -15   1   22.78    1.53
   1 -15   1   21.25    2.34
   1 -15   1   21.23    1.48
   1  15   1   20.67    1.35
  -1  15  -1   20.10    1.42
  -1  15  -1   19.68    1.47
   1  15   1   20.98    1.33
  -1  15  -1   19.96    1.31
   1  15   1   19.42    1.30
   1  15   1   21.86    1.41
  -1  15  -1   21.45    1.37
  -1  15  -1   18.09    3.23
  -1  15  -1   20.03    1.50
  -3 -15  -1    6.15    0.51
   3 -15   1    5.78    0.50
  -3 -15  -1    6.29    0.62
   3 -15   1    5.08    0.49
  -3 -15  -1    5.57    0.45
   3 -15   1    4.99    0.42
   3 -15   1    6.57    0.50
   3 -15   1    4.19    2.54
  -3 -15  -1    6.51    0.51
   3 -15   1    4.26    1.35
   3 -15   1    5.74    0.48
   3 -15   1    5.48    0.43
  -3 -15  -1    5.79    0.57
   3 -15   1    5.39    0.57
  -3 -15  -1    5.12    0.43
   3 -15   1    5.47    1.45
   3 -15   1    6.12    2.05
  -3 -15  -1    5.55    0.59
  -3  15  -1    5.03    0.60
  -3  15  -1    4.83    0.53
  -3  15  -1    5.19    0.59
   3  15   1    4.87    0.36
  -3  15  -1    5.13    1.69
   3  15   1    4.95    0.36
  -3  15  -1    4.71    2.13
  -3  15  -1    5.18    0.64
  -3  15  -1    4.94    0.38
  -3  15  -1    4.88    0.34
   5 -15   1   13.03    0.99
   5 -15   1   13.63    0.95
   5 -15   1   13.40    0.94
  -5 -15  -1   13.84    0.94
   5 -15   1   10.90    2.38
  -5 -15  -1   12.86    0.99
   5 -15   1   14.67    1.05
  -5 -15  -1   15.79    1.03
   5 -15   1   15.21    1.01
  -5 -15  -1   15.58    1.17
  -5 -15  -1   14.57    1.00
  -5 -15  -1   14.40    1.13
   5 -15   1   13.21    1.97
  -5 -15  -1   13.95    0.96
  -5  15  -1   11.96    0.80
  -5  15  -1   11.14    1.10
  -5  15  -1   10.92    1.00
  -5  15  -1   10.37    0.85
  -5  15  -1   13.68    0.91
  -5  15  -1   12.04    0.99
  -5  15  -1   11.14    0.96
  -5  15  -1   13.39    0.77
   7 -15   1    2.45    0.34
  -7 -15  -1    2.38    0.52
   7 -15   1    2.68    0.29
   7 -15   1   -1.14    1.62
   7 -15   1    1.71    0.25
  -7 -15  -1    2.81    0.41
   7 -15   1    2.21    0.33
  -7 -15  -1    2.21    0.32
   7 -15   1    2.96    0.42
  -7 -15  -1    2.44    0.26
  -7 -15  -1    2.31    0.32
  -7 -15  -1    2.66    0.33
  -7 -15  -1    2.91    0.61
   7 -15   1    1.97    0.29
  -7  15  -1    1.84    0.18
  -7  15  -1    1.96    0.35
  -7  15  -1    1.37    0.53
  -7  15  -1    1.82    0.45
  -7  15  -1    1.71    0.40
  -7  15  -1    1.83    0.24
  -7  15  -1    1.29    0.40
  -7  15  -1    1.70    0.22
  -9 -15  -1    4.88    0.81
   9 -15   1    3.06    0.38
  -9 -15  -1    4.52    0.50
   9 -15   1    4.01    0.36
   9 -15   1    3.52    0.44
  -9 -15  -1    3.36    0.33
  -9 -15  -1    2.95    0.44
  -9 -15  -1    3.56    0.59
  -9 -15  -1    3.08    0.77
   9 -15   1    1.43    2.20
   9 -15   1    4.09    0.45
  -9  15  -1    3.48    0.27
  -9  15  -1    3.60    0.37
  -9  15  -1    2.63    0.53
  -9  15  -1    2.79    0.46
  -9  15  -1    3.76    0.46
  -9  15  -1    3.59    0.64
  -9  15  -1    2.84    0.55
  -9  15  -1    2.58    0.74
  11 -15   1    1.60    0.31
 -11 -15  -1    0.87    0.52
  11 -15   1   -0.87    2.80
  11 -15   1    1.84    0.31
  11 -15   1    1.95    0.29
 -11 -15  -1    1.29    0.19
 -11 -15  -1    2.30    0.38
  11 -15   1    2.17    0.29
 -11  15  -1    1.16    0.66
 -11  15  -1    1.75    0.20
  11  15   1    1.95    0.23
 -11  15  -1    1.45    0.47
 -11  15  -1    2.20    0.30
 -11  15  -1    1.67    0.50
 -11  15  -1    1.98    0.45
 -11  15  -1    1.83    0.58
 -11  15  -1    1.88    0.26
  13 -15   1    0.46    0.23
  13 -15   1    1.14    0.29
  13 -15   1    0.72    0.30
  13 -15   1   -2.45    4.35
 -13 -15  -1    0.58    0.31
  13 -15   1    0.84    0.28
  13  15   1    0.65    0.14
 -13  15  -1    1.02    0.25
 -13  15  -1    0.91    0.67
 -13  15  -1    0.34    0.42
 -13  15  -1    0.53    0.10
 -13  15  -1    0.33    0.62
  13  15   1    0.54    0.16
 -13  15  -1    0.37    0.41
 -15 -15  -1   -0.21    0.29
 -15 -15  -1    0.02    0.20
  15 -15   1   -0.33    0.25
  15 -15   1    0.16    0.16
  15 -15   1    0.53    0.30
  15 -15   1   -0.38    0.23
  15  15   1   -0.01    0.14
 -15  15  -1   -0.46    0.46
  15  15   1    0.09    0.10
  15  15   1    0.03    0.24
  17 -15   1    1.64    0.46
 -17 -15  -1    0.90    0.43
  17  15   1    0.71    0.14
  18 -16  -1    0.54    0.47
 -18 -16   1   -0.22    0.30
 -16 -16   1    0.73    0.39
  16 -16  -1    0.81    0.32
  16 -16  -1    0.51    0.26
  16 -16  -1    0.61    0.19
  16  16  -1    1.70    0.17
  16  16  -1    1.22    0.21
  14 -16  -1    1.29    0.19
 -14 -16   1    1.16    0.20
  14 -16  -1    0.88    0.27
 -14 -16   1    0.21    0.65
  14 -16  -1    1.17    0.44
 -14 -16   1    0.88    0.33
 -14 -16   1    1.39    0.46
  14 -16  -1    1.30    5.74
 -14  16   1    0.25    0.47
 -14  16   1    1.14    0.17
  12 -16  -1    1.72    0.29
 -12 -16   1    2.04    0.27
  12 -16  -1    0.98    3.06
 -12 -16   1    2.30    0.41
 -12 -16   1    0.96    0.54
  12 -16  -1    2.98    0.48
  12 -16  -1    2.39    0.35
 -12 -16   1    3.13    0.86
 -12  16   1    1.28    0.43
 -12  16   1    1.49    0.70
 -12  16   1    1.13    0.44
 -12  16   1    1.18    0.40
 -12  16   1    1.43    0.54
 -12  16   1    1.11    0.47
 -12  16   1    1.80    0.19
 -10 -16   1   10.95    0.84
  10 -16  -1    5.64    2.40
  10 -16  -1   10.15    0.87
 -10 -16   1    8.74    1.37
 -10 -16   1    8.77    0.67
  10 -16  -1   10.86    0.75
 -10 -16   1   10.79    0.92
  10 -16  -1    9.14    0.76
  10 -16  -1    9.22    0.73
 -10 -16   1    9.85    0.77
 -10 -16   1    7.95    1.01
 -10 -16   1    9.00    0.71
 -10  16   1    7.98    0.55
 -10  16   1    6.36    0.76
 -10  16   1    6.53    0.98
 -10  16   1    8.44    0.79
 -10  16   1    8.71    0.70
 -10  16   1    8.05    0.60
   8 -16  -1    3.39    0.44
  -8 -16   1    3.88    0.59
  -8 -16   1    3.31    0.33
   8 -16  -1    4.07    0.44
   8 -16  -1    4.32    0.41
   8 -16  -1    4.64    0.44
  -8 -16   1    4.04    0.39
  -8 -16   1    3.49    0.44
  -8 -16   1    3.03    0.58
   8 -16  -1    2.75    0.41
  -8 -16   1    3.43    0.50
   8 -16  -1    3.58    0.38
   8 -16  -1    4.60    0.61
   8 -16  -1    1.57    1.67
  -8 -16   1    3.47    0.64
  -8  16   1    2.49    0.45
  -8  16   1    3.36    0.66
  -8  16   1    3.17    0.58
  -8  16   1    2.34    0.39
  -8  16   1    2.77    0.50
  -8  16   1    3.62    0.34
  -8  16   1    3.16    0.26
  -8  16   1    3.85    0.44
   6 -16  -1   25.19    1.65
  -6 -16   1   25.31    1.65
  -6 -16   1   25.70    1.72
  -6 -16   1   25.16    1.82
  -6 -16   1   24.09    1.60
   6 -16  -1   23.52    1.67
   6 -16  -1   25.19    1.62
   6 -16  -1   26.53    1.71
  -6 -16   1   25.29    1.66
  -6 -16   1   24.21    1.78
  -6 -16   1   23.22    1.62
   6 -16  -1   24.39    1.61
   6 -16  -1   24.71    1.62
  -6  16   1   20.84    1.54
  -6  16   1   21.82    1.68
  -6  16   1   19.77    1.41
  -6  16   1   22.16    1.91
  -6  16   1   22.46    1.36
  -6  16   1   19.66    1.58
  -6  16   1   22.98    1.49
  -6  16   1   21.23    1.39
  -4 -16   1   13.25    0.90
  -4 -16   1   15.15    1.04
  -4 -16   1   12.95    0.89
  -4 -16   1   14.68    1.08
  -4 -16   1   14.21    0.95
   4 -16  -1   11.64    0.89
   4 -16  -1   12.87    0.92
  -4 -16   1   14.49    1.03
   4 -16  -1    7.87    2.62
  -4 -16   1   14.04    0.93
   4 -16  -1   13.00    0.89
   4 -16  -1   11.55    0.87
   4 -16  -1   12.88    0.95
   4 -16  -1   11.14    2.49
   4 -16  -1    9.61    2.00
  -4 -16   1   13.98    1.00
   4 -16  -1   12.15    0.99
   4 -16  -1   12.66    0.94
  -4  16   1   10.76    0.87
  -4  16   1   11.35    0.72
  -4  16   1   10.79    0.74
  -4  16   1   10.96    0.98
  -4  16   1    5.92    3.47
  -4  16   1   10.65    0.95
  -2 -16   1    4.98    0.53
   2 -16  -1    4.79    0.55
  -2 -16   1    4.24    0.43
   2 -16  -1    3.57    1.74
   2 -16  -1    3.81    2.21
   2 -16  -1    4.55    0.45
  -2 -16   1    4.62    0.46
  -2 -16   1    4.18    0.48
  -2 -16   1    4.39    0.40
   2 -16  -1    5.62    0.56
   2 -16  -1    4.39    0.42
   2 -16  -1    4.24    1.08
   2 -16  -1    4.51    0.38
  -2 -16   1    4.79    0.59
   2  16  -1    3.57    0.27
  -2  16   1    3.47    0.30
   2  16  -1    3.88    0.42
  -2  16   1    4.24    0.52
  -2  16   1    4.14    0.42
   2  16  -1    3.42    0.47
   2  16  -1    4.14    0.34
  -2  16   1    3.53    0.26
  -2  16   1    3.53    0.50
  -2  16   1    4.24    0.38
   0 -16   1    9.95    0.71
   0 -16  -1    9.27    0.72
   0 -16   1    7.26    0.95
   0 -16   1    9.78    0.72
   0 -16   1    8.59    0.68
   0 -16  -1    8.14    0.70
   0 -16  -1    8.57    0.68
   0 -16  -1    9.25    0.89
   0 -16   1    9.47    0.69
   0  16   1    7.08    0.53
   0  16   1    6.44    0.47
   0  16   1    7.45    0.65
   0  16  -1    7.15    0.48
   0  16   1    7.22    0.56
   0  16  -1    7.65    0.62
   0  16  -1    7.49    0.67
   0  16  -1    6.17    0.46
   0  16  -1    6.55    0.69
   2 -16   1    5.07    0.40
   2 -16   1    5.74    0.47
  -2 -16  -1    5.25    0.44
   2 -16   1    4.27    2.01
   2 -16   1    5.38    2.02
   2 -16   1    5.69    0.49
   2 -16   1    4.96    0.46
   2 -16   1    5.83    0.59
  -2 -16  -1    5.35    0.49
  -2 -16  -1    4.98    0.42
  -2 -16  -1    6.10    0.50
  -2 -16  -1    5.11    0.57
   2 -16   1    4.44    1.19
   2  16   1    4.66    0.40
  -2  16  -1    5.18    0.45
  -2  16  -1    4.73    0.37
   2  16   1    4.69    0.37
  -2  16  -1    5.07    0.64
  -2  16  -1    5.19    0.65
  -2  16  -1    4.47    0.33
  -2  16  -1    4.87    0.53
  -4 -16  -1   17.11    1.11
   4 -16   1   15.65    1.15
  -4 -16  -1   15.59    1.04
  -4 -16  -1   16.51    1.14
   4 -16   1   15.17    1.06
   4 -16   1   14.29    1.04
   4 -16   1   15.52    1.09
  -4 -16  -1   14.45    1.18
  -4 -16  -1   17.24    1.26
   4 -16   1   15.89    1.10
   4 -16   1   11.01    2.32
  -4 -16  -1   16.51    1.09
  -4 -16  -1   16.15    1.16
  -4 -16  -1   14.94    1.06
  -4  16  -1   13.40    0.83
  -4  16  -1   14.15    0.96
  -4  16  -1   12.11    1.14
  -4  16  -1   11.67    1.03
  -4  16  -1   12.15    0.89
  -4  16  -1   13.99    0.89
  -4  16  -1   12.52    1.07
  -4  16  -1   12.10    1.03
   6 -16   1   14.33    1.06
  -6 -16  -1   12.53    0.99
   6 -16   1   14.28    0.96
  -6 -16  -1   13.98    1.00
   6 -16   1   14.56    0.98
  -6 -16  -1   14.48    1.04
  -6 -16  -1   14.06    0.97
  -6 -16  -1   14.21    1.09
  -6 -16  -1   13.61    0.94
  -6 -16  -1   15.80    1.26
   6 -16   1    9.21    2.51
   6 -16   1   13.80    1.00
  -6  16  -1   11.37    0.79
  -6  16  -1    9.62    0.95
  -6  16  -1   11.89    1.03
  -6  16  -1   11.79    0.82
  -6  16  -1   11.99    0.91
  -6  16  -1   12.06    0.75
  -8 -16  -1    0.27    0.49
   8 -16   1   -0.86    1.74
   8 -16   1    0.36    0.19
   8 -16   1    0.35    0.23
  -8 -16  -1    0.22    0.46
  -8 -16  -1    0.05    0.31
  -8 -16  -1    0.73    0.28
  -8 -16  -1    0.25    0.23
   8 -16   1    0.12    0.18
  -8 -16  -1    0.01    0.36
   8 -16   1    0.42    0.19
  -8  16  -1    0.40    0.33
  -8  16  -1    0.40    0.21
  -8  16  -1    0.26    0.18
  -8  16  -1    0.45    0.34
  -8  16  -1    0.26    0.26
  -8  16  -1    0.29    0.43
  -8  16  -1    0.21    0.10
  -8  16  -1    0.47    0.39
  10 -16   1    0.49    0.17
  10 -16   1    0.13    0.21
  10 -16   1    1.07    0.22
 -10 -16  -1    1.00    0.23
  10 -16   1    0.53    0.48
 -10 -16  -1    0.44    0.51
  10 -16   1    0.79    0.22
 -10 -16  -1    0.60    0.14
  10 -16   1    0.78    0.38
 -10 -16  -1    0.19    0.38
 -10 -16  -1    0.83    0.32
  10 -16   1   -0.40    2.27
 -10  16  -1    0.28    0.33
 -10  16  -1    0.29    0.37
 -10  16  -1    0.40    0.20
 -10  16  -1    0.41    0.11
 -10  16  -1    0.73    0.24
 -10  16  -1    0.50    0.39
 -10  16  -1    0.44    0.44
 -10  16  -1    0.86    0.61
  10  16   1    0.44    0.11
  12 -16   1    1.05    0.25
  12 -16   1    0.39    0.24
  12 -16   1    0.65    0.28
 -12 -16  -1    0.78    0.31
 -12 -16  -1    0.89    0.48
  12 -16   1    0.68    3.51
 -12  16  -1    0.65    0.87
 -12  16  -1    0.78    0.45
 -12  16  -1    0.15    0.54
  12  16   1    0.70    0.14
 -12  16  -1    0.08    0.67
 -12  16  -1    0.72    0.24
 -12  16  -1    0.61    0.69
 -12  16  -1    0.74    0.29
 -12  16  -1    0.52    0.12
  14 -16   1    0.59    0.26
 -14 -16  -1    0.85    0.33
 -14 -16  -1    0.81    0.22
  14 -16   1    0.59    0.27
  14 -16   1    1.10    0.18
  14  16   1    0.64    0.31
 -14  16  -1    0.81    0.26
  14  16   1    0.96    0.16
 -14  16  -1    0.68    0.49
  16 -16   1    0.79    0.53
 -16 -16  -1    0.13    0.36
  16  16   1    0.82    0.15
  17 -17  -1    1.45    0.44
 -17 -17   1    0.17    0.36
 -15 -17   1    0.34    0.32
  15 -17  -1    0.18    0.25
  15 -17  -1    0.78    0.28
  15 -17  -1    0.46    0.30
 -15  17   1    0.44    0.52
 -15  17   1    0.26    0.45
 -13 -17   1    0.99    0.68
  13 -17  -1    2.09    4.01
 -13 -17   1    1.47    0.24
  13 -17  -1    1.37    0.34
  13 -17  -1    1.16    0.30
 -13 -17   1    2.04    0.50
 -13 -17   1    1.79    0.41
  13 -17  -1    2.05    0.29
 -13  17   1    1.62    1.21
 -13  17   1    0.93    0.13
 -13  17   1   -0.01    0.75
 -13  17   1    1.18    0.24
 -13  17   1    0.59    0.46
  11 -17  -1    7.53    0.65
 -11 -17   1    7.17    0.63
 -11 -17   1    7.93    0.58
  11 -17  -1    6.57    0.66
 -11 -17   1    6.64    0.52
 -11 -17   1    6.99    1.11
  11 -17  -1    4.58    3.91
 -11 -17   1    8.27    0.74
 -11  17   1    6.88    0.78
 -11  17   1    5.55    0.73
 -11  17   1    6.08    0.88
 -11  17   1    8.09    0.67
 -11  17   1    6.97    0.48
   9 -17  -1    0.40    0.25
   9 -17  -1    0.77    0.18
  -9 -17   1    1.15    0.43
  -9 -17   1    0.38    0.14
  -9 -17   1    1.15    0.72
   9 -17  -1    0.65    0.25
   9 -17  -1   -1.68    1.78
  -9 -17   1    0.43    0.31
   9 -17  -1   -0.15    0.26
  -9 -17   1    0.36    0.46
   9 -17  -1    0.49    0.23
   9 -17  -1    0.61    0.19
  -9 -17   1    0.24    0.19
  -9 -17   1    0.77    0.28
  -9  17   1    0.25    0.31
  -9  17   1    0.67    0.35
  -9  17   1    0.77    0.25
  -9  17   1    0.45    0.12
  -9  17   1    0.02    0.47
  -9  17   1    0.67    0.20
  -9  17   1    0.00    0.53
  -9  17   1    0.53    0.49
   7 -17  -1    1.53    0.29
   7 -17  -1    1.58    0.27
  -7 -17   1    2.19    0.33
   7 -17  -1    1.62    1.53
  -7 -17   1    2.46    0.45
  -7 -17   1    1.71    0.30
  -7 -17   1    2.13    0.38
   7 -17  -1    1.32    0.29
  -7 -17   1    1.95    0.26
   7 -17  -1    1.95    0.51
   7 -17  -1    1.50    0.22
   7 -17  -1    0.98    0.37
  -7 -17   1    1.70    0.50
  -7  17   1    0.88    0.35
  -7  17   1    1.11    0.37
  -7  17   1    1.03    0.20
  -7  17   1    0.62    0.36
  -7  17   1    1.35    0.14
  -7  17   1    1.31    0.25
  -7  17   1    0.94    0.48
  -7  17   1    1.30    0.30
  -5 -17   1   10.37    0.95
  -5 -17   1   11.94    0.80
  -5 -17   1   10.44    0.78
  -5 -17   1   11.83    1.02
   5 -17  -1   11.76    0.80
  -5 -17   1   11.23    0.85
  -5 -17   1   11.11    0.94
  -5 -17   1   11.16    0.91
   5 -17  -1   10.49    0.78
   5 -17  -1   12.30    0.87
   5 -17  -1   11.47    0.84
   5 -17  -1   12.09    0.93
   5 -17  -1   10.80    0.79
  -5 -17   1   11.67    0.83
  -5  17   1    9.94    0.63
  -5  17   1    8.86    0.93
  -5  17   1   10.04    0.67
  -5  17   1    9.07    0.95
  -5  17   1    9.58    0.70
  -5  17   1    9.61    0.84
  -5  17   1    8.89    0.76
   3 -17  -1    6.83    0.54
   3 -17  -1    7.43    0.62
  -3 -17   1    7.23    0.66
   3 -17  -1    4.54    2.03
   3 -17  -1    6.85    0.58
  -3 -17   1    6.85    0.61
  -3 -17   1    7.90    0.72
  -3 -17   1    7.32    0.71
   3 -17  -1    7.14    0.53
  -3 -17   1    6.60    0.54
   3 -17  -1    5.45    1.41
   3 -17  -1    6.40    0.50
  -3 -17   1    6.97    0.58
   3 -17  -1    8.36    0.72
  -3 -17   1    8.16    0.70
   3 -17  -1    7.40    0.62
  -3 -17   1    7.17    0.55
   3  17  -1    5.20    0.39
  -3  17   1    6.06    0.67
  -3  17   1    5.70    0.50
  -3  17   1    5.97    0.40
  -3  17   1    6.04    0.57
  -3  17   1    5.89    0.69
   3  17  -1    6.21    0.46
  -1 -17   1    4.78    0.57
   1 -17  -1    3.91    0.45
   1 -17  -1    4.22    0.47
  -1 -17   1    4.56    0.43
   1 -17  -1    3.87    0.38
  -1 -17   1    4.45    0.40
  -1 -17   1    4.08    0.46
   1 -17  -1    4.19    0.44
  -1 -17   1    4.08    0.43
   1 -17  -1    4.48    0.57
  -1 -17   1    5.37    0.64
  -1 -17   1    5.09    0.50
  -1  17   1    3.93    0.41
  -1  17   1    3.15    0.50
  -1  17   1    3.35    0.28
   1  17  -1    3.49    0.27
   1  17  -1    4.11    0.35
   1  17  -1    3.65    0.44
  -1  17   1    3.01    0.24
  -1  17   1    3.62    0.36
   1  17  -1    2.94    0.51
   1 -17   1    9.48    1.56
  -1 -17  -1    7.70    0.65
   1 -17   1    8.71    0.66
   1 -17   1    8.81    0.61
   1 -17   1    8.79    0.73
   1 -17   1    9.05    0.66
   1 -17   1    7.42    0.54
  -1 -17  -1    7.08    0.72
  -1 -17  -1    7.45    0.65
  -1 -17  -1    7.59    0.58
  -1 -17  -1    7.43    0.61
  -1  17  -1    7.35    0.56
  -1  17  -1    6.88    0.44
   1  17   1    5.73    0.45
  -1  17  -1    6.47    0.80
   1  17   1    6.30    0.53
  -1  17  -1    6.63    0.90
  -1  17  -1    6.68    0.47
   1  17   1    6.76    0.51
   1  17   1    6.41    0.61
  -3 -17  -1    2.05    0.41
  -3 -17  -1    2.51    0.34
  -3 -17  -1    1.62    0.42
   3 -17   1   -1.70    2.98
   3 -17   1    1.75    0.24
  -3 -17  -1    1.74    0.29
  -3 -17  -1    2.07    0.33
  -3 -17  -1    1.75    0.25
   3 -17   1    1.44    0.23
   3 -17   1    1.54    0.27
   3 -17   1    1.77    0.38
   3 -17   1    1.95    0.31
  -3  17  -1    1.65    0.39
   3  17   1    1.42    0.20
  -3  17  -1    1.19    0.21
  -3  17  -1    0.96    0.35
   3  17   1    1.21    0.14
  -3  17  -1    1.18    0.44
  -3  17  -1    1.43    0.27
  -3  17  -1    1.49    0.19
  -3  17  -1    1.32    0.15
   5 -17   1    6.41    0.52
   5 -17   1    6.91    0.71
   5 -17   1    6.29    0.58
  -5 -17  -1    6.94    0.51
  -5 -17  -1    6.13    0.80
   5 -17   1    6.76    0.55
  -5 -17  -1    6.76    0.59
   5 -17   1    6.17    0.58
  -5 -17  -1    6.52    0.66
  -5 -17  -1    6.23    0.58
   5 -17   1    5.30    1.87
  -5 -17  -1    7.41    0.65
  -5 -17  -1    6.71    0.54
  -5  17  -1    4.84    0.45
  -5  17  -1    4.44    0.75
  -5  17  -1    4.75    0.66
  -5  17  -1    5.16    0.41
  -5  17  -1    5.18    0.53
  -5  17  -1    3.93    0.64
  -5  17  -1    4.98    0.67
  -5  17  -1    5.54    0.36
  -7 -17  -1    3.01    0.64
   7 -17   1    3.79    0.44
   7 -17   1    4.12    0.65
  -7 -17  -1    3.70    0.75
  -7 -17  -1    4.36    0.70
  -7 -17  -1    4.95    0.45
  -7 -17  -1    4.60    0.39
  -7  17  -1    3.06    0.46
  -7  17  -1    3.27    0.34
  -7  17  -1    2.44    0.48
  -7  17  -1    3.03    0.56
  -7  17  -1    3.17    0.25
  -7  17  -1    1.74    0.59
  -7  17  -1    2.42    0.50
  -7  17  -1    3.04    0.43
  -9 -17  -1    1.16    0.18
  -9 -17  -1    1.45    0.36
   9 -17   1    0.07    2.21
   9 -17   1    0.83    0.39
  -9 -17  -1    1.09    0.28
   9 -17   1    1.52    0.25
  -9 -17  -1    1.39    0.25
   9 -17   1    0.87    0.24
   9 -17   1    1.73    0.24
  -9 -17  -1    0.73    0.53
  -9 -17  -1    1.11    0.41
   9 -17   1    1.78    0.44
  -9  17  -1    0.65    0.58
  -9  17  -1    1.09    0.22
  -9  17  -1    1.08    0.47
  -9  17  -1    1.04    0.25
  -9  17  -1    0.59    0.34
  -9  17  -1    0.86    0.37
  -9  17  -1    0.83    0.42
  -9  17  -1    0.89    0.13
 -11 -17  -1   -0.12    0.29
  11 -17   1   -0.28    0.23
  11 -17   1   -0.23    0.24
 -11 -17  -1    0.16    0.22
  11 -17   1    0.69    2.95
  11 -17   1    0.05    0.41
  11 -17   1   -0.06    0.19
 -11  17  -1    0.06    0.57
 -11  17  -1   -0.23    0.19
 -11  17  -1   -0.01    0.50
 -11  17  -1   -0.05    0.25
 -11  17  -1   -0.24    0.35
 -11  17  -1   -0.08    0.10
 -11  17  -1   -0.01    0.35
 -11  17  -1   -0.23    0.43
  13 -17   1    6.14    5.21
 -13 -17  -1    3.00    0.46
 -13 -17  -1    2.29    0.38
  13 -17   1    2.22    0.36
  13 -17   1    3.42    0.46
 -13  17  -1    1.86    0.19
  13  17   1    2.57    0.31
 -13  17  -1    1.77    0.56
 -13  17  -1    1.70    0.33
 -15 -17  -1    0.62    0.22
 -15 -17  -1    0.57    0.35
  15 -17   1    1.03    0.35
  16 -18  -1    0.99    0.43
 -16 -18   1    0.37    0.36
  14 -18  -1    0.24    0.28
  14 -18  -1    0.37    0.27
 -14 -18   1   -0.01    0.24
 -14 -18   1    0.51    0.37
 -14  18   1    0.49    0.59
 -14  18   1    0.56    0.11
  12 -18  -1    3.83    0.50
  12 -18  -1    2.02    3.23
  12 -18  -1    3.65    0.45
 -12 -18   1    4.76    0.41
 -12 -18   1    3.28    0.56
 -12  18   1    3.35    0.26
 -12  18   1    2.38    0.64
 -12  18   1    2.40    0.74
 -12  18   1    1.39    0.78
 -12  18   1    3.06    0.56
 -10 -18   1    0.47    0.26
 -10 -18   1    0.58    0.14
 -10 -18   1    0.89    0.36
 -10 -18   1    1.13    0.46
  10 -18  -1    3.69    3.99
 -10 -18   1    0.88    0.21
 -10 -18   1   -0.04    0.50
 -10 -18   1    0.12    0.66
  10 -18  -1    0.44    0.27
  10 -18  -1    1.47    0.46
  10 -18  -1    0.43    0.25
  10 -18  -1    0.64    0.18
 -10  18   1    0.53    0.11
 -10  18   1    0.48    0.55
 -10  18   1    0.49    0.24
 -10  18   1    0.02    0.35
 -10  18   1    0.43    0.33
 -10  18   1    0.64    0.44
 -10  18   1    0.28    0.32
   8 -18  -1    0.46    0.25
  -8 -18   1    0.19    0.45
  -8 -18   1    0.30    0.26
  -8 -18   1    0.37    0.14
  -8 -18   1    0.56    0.43
  -8 -18   1    0.36    0.20
   8 -18  -1    0.36    0.24
   8 -18  -1    1.53    1.84
   8 -18  -1   -0.05    0.23
  -8 -18   1    0.89    0.87
   8 -18  -1   -0.12    0.20
   8 -18  -1    0.19    0.16
  -8 -18   1   -0.09    0.31
   8 -18  -1    0.69    0.40
   8 -18  -1    0.42    0.19
  -8  18   1    0.20    0.10
  -8  18   1   -0.07    0.30
  -8  18   1    0.04    0.38
  -8  18   1    0.14    0.23
  -8  18   1   -0.04    0.48
  -8  18   1   -0.03    0.37
  -8  18   1    0.02    0.18
  -8  18   1    0.18    0.27
   6 -18  -1    5.12    0.51
   6 -18  -1    4.20    0.44
   6 -18  -1    4.13    0.54
   6 -18  -1    4.34    1.51
  -6 -18   1    5.58    0.77
   6 -18  -1    6.02    0.68
  -6 -18   1    6.02    0.92
  -6 -18   1    4.21    0.68
  -6 -18   1    4.01    0.57
  -6 -18   1    5.66    0.74
  -6 -18   1    5.30    0.47
   6 -18  -1    4.41    0.50
   6 -18  -1    5.01    0.45
  -6  18   1    2.64    0.62
  -6  18   1    4.17    0.29
  -6  18   1    3.96    0.36
  -6  18   1    3.48    0.54
  -6  18   1    3.84    0.46
  -6  18   1    2.96    0.54
  -6  18   1    3.11    0.58
  -4 -18   1    1.34    0.21
  -4 -18   1    1.45    0.36
  -4 -18   1    0.82    0.18
   4 -18  -1    1.50    0.37
   4 -18  -1    1.19    0.17
   4 -18  -1    1.08    0.28
   4 -18  -1    2.81    2.83
  -4 -18   1    1.23    0.38
  -4 -18   1    0.92    0.24
   4 -18  -1    1.20    0.21
   4 -18  -1    1.46    1.10
  -4 -18   1    1.72    0.46
  -4 -18   1    1.65    0.43
   4 -18  -1    1.11    0.21
   4 -18  -1    1.11    0.28
  -4 -18   1    1.41    0.31
  -4  18   1    0.66    0.34
   4  18  -1    0.90    0.18
  -4  18   1    1.09    0.12
  -4  18   1    1.10    0.26
  -4  18   1    0.93    0.45
  -4  18   1    0.95    0.18
  -4  18   1    0.98    0.20
  -4  18   1    1.11    0.34
   2 -18  -1    2.17    0.30
   2 -18  -1    0.49    1.03
   2 -18  -1    1.92    0.75
   2 -18  -1    1.94    0.23
   2 -18  -1    2.45    0.36
  -2 -18   1    2.22    0.32
  -2 -18   1    2.61    0.35
   2 -18  -1    1.72    0.28
  -2 -18   1    2.09    0.30
  -2 -18   1    2.33    0.33
  -2 -18   1    3.08    0.45
   2 -18  -1    2.93    0.43
  -2  18   1    1.93    0.21
  -2  18   1    1.94    0.17
  -2  18   1    2.19    0.36
   2  18  -1    1.78    0.20
   2  18  -1    1.98    0.28
  -2  18   1    1.91    0.47
   2  18  -1    2.49    0.35
   0 -18  -1   14.64    1.06
   0 -18   1   14.11    0.93
   0 -18  -1   12.67    0.99
   0 -18  -1   13.97    0.92
   0 -18   1   11.48    1.18
   0 -18   1   12.55    0.98
   0 -18  -1   13.41    0.98
   0 -18   1   14.16    1.06
   0 -18   1   13.28    0.98
   0 -18  -1   13.51    0.95
   0 -18   1   13.21    0.96
   0  18  -1   10.19    0.87
   0  18   1   10.86    0.96
   0  18  -1    8.72    0.96
   0  18   1   10.72    0.69
   0  18   1   11.87    0.88
   0  18  -1    9.91    0.76
   0  18  -1   11.73    0.80
   0  18  -1    9.90    0.72
   0  18   1   11.26    0.71
   2 -18   1    6.07    1.36
  -2 -18  -1    7.13    0.68
  -2 -18  -1    8.24    0.60
   2 -18   1    7.72    0.56
   2 -18   1    7.32    0.68
   2 -18   1    4.50    1.86
   2 -18   1    9.08    0.79
  -2 -18  -1    8.30    0.68
   2 -18   1    7.85    0.68
  -2 -18  -1    8.82    0.63
   2 -18   1    8.49    0.62
  -2 -18  -1    9.18    0.79
  -2  18  -1    5.31    0.78
  -2  18  -1    6.78    0.45
  -2  18  -1    7.17    0.59
   2  18   1    6.22    0.45
  -2  18  -1    7.01    0.49
  -2  18  -1    7.22    0.69
  -4 -18  -1    5.07    0.61
   4 -18   1    4.75    0.50
  -4 -18  -1    3.13    0.63
  -4 -18  -1    4.90    0.48
   4 -18   1    4.31    0.50
   4 -18   1    3.86    0.38
  -4 -18  -1    4.50    0.56
  -4 -18  -1    4.68    0.52
  -4 -18  -1    4.54    0.41
   4 -18   1    4.05    0.43
   4 -18   1    5.28    0.64
  -4  18  -1    3.24    0.44
  -4  18  -1    3.32    0.64
  -4  18  -1    3.27    0.60
  -4  18  -1    3.69    0.34
  -4  18  -1    3.40    0.27
  -4  18  -1    3.56    0.55
  -4  18  -1    3.49    0.38
  -6 -18  -1    5.50    0.57
   6 -18   1    4.03    1.81
  -6 -18  -1    6.22    0.72
   6 -18   1    6.17    0.57
  -6 -18  -1    6.65    0.53
  -6 -18  -1    6.46    0.49
   6 -18   1    6.09    0.53
   6 -18   1    6.81    0.74
   6 -18   1    5.82    0.52
  -6 -18  -1    5.66    0.56
  -6 -18  -1    5.09    0.86
  -6  18  -1    4.12    0.64
  -6  18  -1    3.60    0.64
  -6  18  -1    4.88    0.55
  -6  18  -1    3.12    0.71
  -6  18  -1    4.76    0.41
  -6  18  -1    4.03    0.65
  -6  18  -1    4.93    0.34
  -6  18  -1    4.81    0.47
  -8 -18  -1    2.86    0.31
   8 -18   1    3.13    2.14
  -8 -18  -1    2.76    0.46
   8 -18   1    2.18    0.34
   8 -18   1    3.09    0.40
  -8 -18  -1    3.08    0.40
  -8 -18  -1    3.53    0.48
   8 -18   1    2.40    0.39
  -8 -18  -1    3.07    0.48
  -8  18  -1    1.81    0.39
  -8  18  -1    1.84    0.50
  -8  18  -1    2.06    0.27
  -8  18  -1    1.72    0.64
  -8  18  -1    2.13    0.30
  -8  18  -1    1.80    0.49
  -8  18  -1    1.60    0.43
  -8  18  -1    2.01    0.21
  10 -18   1    1.58    0.27
  10 -18   1    1.60    0.45
  10 -18   1    1.18    0.23
 -10 -18  -1    0.83    0.32
 -10 -18  -1    1.14    0.18
  10 -18   1   -2.16    2.38
 -10 -18  -1    1.75    0.39
 -10  18  -1    1.09    0.24
 -10  18  -1    0.82    0.39
 -10  18  -1    1.19    0.27
 -10  18  -1    0.27    0.40
 -10  18  -1    0.85    0.55
 -10  18  -1    0.66    0.57
 -10  18  -1    0.77    0.45
 -10  18  -1    1.05    0.14
 -12 -18  -1    0.47    0.20
  12 -18   1   -3.70    4.12
 -12  18  -1    1.08    0.27
 -12  18  -1    0.66    0.14
 -12  18  -1    0.37    0.50
 -12  18  -1    0.71    0.22
  14 -18   1    0.44    0.29
 -14 -18  -1    0.09    0.21
 -14 -18  -1    0.07    0.35
 -14  18  -1    0.52    0.42
 -16 -18  -1    0.08    0.33
  16 -18   1    0.76    0.37
 -15 -19   1   -0.15    0.36
 -15  19   1   -0.04    0.34
 -13 -19   1    0.59    0.31
  13 -19  -1    0.01    0.29
  13 -19  -1    1.00    0.25
 -13 -19   1    0.26    0.34
 -13  19   1   -0.46    0.66
 -13  19   1    0.60    0.22
 -13  19   1    0.41    0.10
  11 -19  -1    0.97    0.33
 -11 -19   1    1.14    0.38
 -11 -19   1    0.62    0.60
  11 -19  -1    1.21    0.28
  11 -19  -1   -1.39    2.77
 -11 -19   1    0.95    0.16
 -11 -19   1    1.39    0.29
 -11  19   1    1.43    0.52
 -11  19   1    0.64    0.49
 -11  19   1    1.20    0.15
 -11  19   1    0.97    0.24
 -11  19   1    1.39    0.63
 -11  19   1    1.00    0.85
 -11  19   1    1.76    0.31
 -11  19   1    0.35    0.41
   9 -19  -1    1.99    0.34
  -9 -19   1    1.50    0.72
   9 -19  -1    1.57    0.42
  -9 -19   1    1.97    0.35
  -9 -19   1    1.94    0.29
  -9 -19   1    2.11    0.44
  -9 -19   1    1.75    0.27
   9 -19  -1    2.24    0.33
  -9 -19   1    2.74    0.53
   9 -19  -1    2.55    0.38
  -9 -19   1    1.03    0.56
   9 -19  -1    0.76    2.29
  -9  19   1    1.88    0.31
  -9  19   1    1.57    0.17
  -9  19   1    1.35    0.48
  -9  19   1    1.44    0.64
  -9  19   1    0.89    0.46
  -9  19   1    1.25    0.44
  -9  19   1    1.60    0.40
  -7 -19   1    5.97    0.59
   7 -19  -1    5.06    0.49
  -7 -19   1    4.02    0.70
  -7 -19   1    6.21    1.05
   7 -19  -1    5.93    0.50
   7 -19  -1    5.39    0.54
   7 -19  -1    3.88    2.07
  -7 -19   1    6.12    0.76
   7 -19  -1    5.95    0.48
  -7 -19   1    5.68    0.45
   7 -19  -1    5.15    0.53
  -7 -19   1    5.58    0.49
  -7 -19   1    4.95    0.64
   7 -19  -1    4.76    0.54
  -7  19   1    4.31    0.85
  -7  19   1    4.73    0.42
  -7  19   1    3.79    0.85
  -7  19   1    4.52    0.53
  -7  19   1    4.59    0.34
  -7  19   1    3.79    0.64
  -7  19   1    4.97    0.70
  -7  19   1    4.88    0.51
  -5 -19   1    2.40    0.50
   5 -19  -1    1.77    0.23
  -5 -19   1    1.58    0.24
   5 -19  -1    2.06    0.36
  -5 -19   1    1.73    0.22
   5 -19  -1    1.05    1.31
  -5 -19   1    2.55    0.51
  -5 -19   1    2.53    0.58
   5 -19  -1    1.64    0.25
  -5 -19   1    1.94    0.32
   5 -19  -1    1.55    0.22
   5 -19  -1    2.14    0.43
   5 -19  -1    2.22    0.32
  -5  19   1    1.42    0.53
  -5  19   1    1.68    0.43
  -5  19   1    1.33    0.45
  -5  19   1    1.31    0.30
  -5  19   1    1.33    0.22
  -5  19   1    1.72    0.17
  -3 -19   1   10.46    0.79
  -3 -19   1   10.17    0.95
  -3 -19   1   10.24    0.91
   3 -19  -1    9.37    0.68
   3 -19  -1    9.70    0.79
   3 -19  -1   12.20    1.10
   3 -19  -1    6.95    1.44
  -3 -19   1    9.96    0.78
  -3 -19   1    9.60    0.85
   3  19  -1    7.19    0.55
  -3  19   1    8.68    0.54
  -3  19   1    8.30    0.59
  -3  19   1    8.11    0.76
  -3  19   1    7.68    0.62
  -3  19   1    7.35    0.88
  -3  19   1    8.49    0.68
   3  19  -1    8.99    0.63
   1 -19  -1    6.86    0.56
   1 -19  -1    7.16    0.67
  -1 -19   1    7.52    0.66
  -1 -19   1    7.59    0.60
  -1 -19   1    7.69    0.59
   1 -19  -1    7.15    0.78
  -1 -19   1    6.82    0.87
  -1 -19   1    6.22    0.70
   1 -19  -1    7.21    0.63
  -1 -19   1    6.61    0.61
   1 -19  -1    5.98    0.71
  -1  19   1    4.66    0.55
   1  19  -1    5.48    0.57
   1  19  -1    4.14    0.64
  -1  19   1    4.88    0.35
   1  19  -1    5.52    0.39
  -1  19   1    5.12    0.47
  -1  19   1    4.67    0.68
   1  19  -1    4.93    0.35
  -1  19   1    4.80    0.40
   1  19  -1    5.76    0.48
   1 -19   1    3.51    0.64
   1 -19   1    4.49    0.36
  -1 -19  -1    5.76    0.54
   1 -19   1    4.55    0.55
   1 -19   1    4.59    0.61
   1 -19   1    6.04    0.62
  -1 -19  -1    6.13    0.65
   1  19   1    4.59    0.34
  -1  19  -1    4.74    0.37
   1  19   1    4.49    0.59
   1  19   1    4.37    0.48
  -1  19  -1    4.41    0.70
  -1  19  -1    4.23    0.58
  -1  19  -1    4.20    0.45
  -1  19  -1    4.09    0.31
   3 -19   1    3.68    1.23
  -3 -19  -1    4.93    0.47
   3 -19   1    3.92    0.37
   3 -19   1    4.34    0.46
   3 -19   1    4.73    0.64
  -3 -19  -1    4.59    0.40
  -3 -19  -1    4.50    0.53
   3 -19   1    4.16    0.47
  -3 -19  -1    3.36    0.54
  -3  19  -1    3.52    0.38
   3  19   1    3.12    0.27
  -3  19  -1    3.33    0.26
  -3  19  -1    2.96    0.34
  -3  19  -1    2.89    0.68
  -3  19  -1    3.81    0.58
  -3  19  -1    3.60    0.43
  -5 -19  -1    2.38    0.42
   5 -19   1    1.56    1.49
   5 -19   1    1.62    0.31
  -5 -19  -1    1.36    0.27
  -5 -19  -1    1.71    0.42
  -5 -19  -1    1.62    0.33
   5 -19   1    1.79    0.33
   5 -19   1    1.49    0.22
  -5 -19  -1    1.75    0.34
   5 -19   1    1.92    0.26
  -5 -19  -1    1.35    0.20
  -5  19  -1    1.37    0.45
  -5  19  -1    0.95    0.22
  -5  19  -1    0.66    0.51
  -5  19  -1    1.05    0.43
  -5  19  -1    1.27    0.22
  -5  19  -1    1.18    0.14
  -5  19  -1    1.09    0.33
   7 -19   1    1.27    1.84
  -7 -19  -1    2.10    0.42
  -7 -19  -1    3.32    0.52
   7 -19   1    2.27    0.30
   7 -19   1    3.14    0.52
  -7 -19  -1    2.30    0.36
   7 -19   1    2.32    0.37
  -7 -19  -1    2.87    0.32
  -7  19  -1    1.55    0.49
  -7  19  -1    1.58    0.19
  -7  19  -1    1.54    0.37
  -7  19  -1    1.51    0.24
  -7  19  -1    0.83    0.42
  -7  19  -1    1.95    0.28
  -7  19  -1    1.18    0.60
  -7  19  -1    1.03    0.44
  -9 -19  -1    0.09    0.44
  -9 -19  -1    0.50    0.22
  -9 -19  -1    0.27    0.15
  -9 -19  -1    0.18    0.27
  -9 -19  -1    0.12    0.34
   9 -19   1    0.40    0.20
   9 -19   1    0.28    0.22
   9 -19   1    0.46    0.45
   9 -19   1   -0.76    2.27
  -9  19  -1    0.19    0.11
  -9  19  -1    0.55    0.50
  -9  19  -1    0.10    0.25
  -9  19  -1   -0.30    0.32
  -9  19  -1   -0.06    0.50
  -9  19  -1   -0.01    0.34
  -9  19  -1   -0.03    0.19
  -9  19  -1   -0.32    0.37
  11 -19   1    0.06    0.19
  11 -19   1   -1.18    3.86
  11 -19   1    0.07    0.41
 -11 -19  -1   -0.25    0.31
 -11 -19  -1    0.07    0.22
 -11  19  -1   -0.01    0.25
 -11  19  -1   -0.03    0.10
 -11  19  -1    0.23    0.49
 -11  19  -1   -0.12    0.20
 -13 -19  -1    2.31    0.45
 -13 -19  -1    1.39    0.32
 -13  19  -1    1.24    0.14
 -13  19  -1    0.86    0.66
 -13  19  -1    1.56    0.35
  15 -19   1    0.40    0.34
 -15 -19  -1   -0.17    0.28
  14 -20  -1    1.50    0.34
 -14 -20   1    0.66    0.42
 -14  20   1    0.58    0.12
 -14  20   1    0.77    0.37
 -12 -20   1    2.97    0.47
 -12 -20   1    2.14    0.38
 -12 -20   1    1.83    0.40
 -12  20   1    2.47    0.41
 -12  20   1    1.82    0.20
 -12  20   1    1.43    0.60
 -10 -20   1    3.55    0.62
  10 -20  -1    4.54    0.68
  10 -20  -1    4.23    0.44
 -10 -20   1    3.38    0.47
 -10 -20   1    3.07    0.33
  10 -20  -1    1.36    2.60
 -10 -20   1    3.39    0.41
 -10 -20   1    3.38    0.54
 -10  20   1    1.74    0.49
 -10  20   1    1.59    0.49
 -10  20   1    2.34    0.88
 -10  20   1    2.20    0.64
 -10  20   1    2.34    0.23
 -10  20   1    1.88    0.84
 -10  20   1    3.16    0.35
  -8 -20   1    3.53    0.53
   8 -20  -1    3.46    2.19
  -8 -20   1    3.77    0.94
   8 -20  -1    4.72    0.44
   8 -20  -1    3.63    0.48
  -8 -20   1    3.93    0.43
  -8 -20   1    2.78    0.50
  -8 -20   1    4.50    0.68
   8 -20  -1    3.62    0.41
  -8 -20   1    4.35    0.38
  -8  20   1    2.78    0.47
  -8  20   1    2.82    0.26
  -8  20   1    3.48    0.53
[truncated: 2,754,045 more chars]
